# Supplementary material for: Interactome Profiling of N-Terminus-Truncated NS1 Protein of Influenza A Virus Reveals Role of 14-3-3γ in Virus Replication
Source: MDPI journal article supplement (doi:10.3390/pathogens11070733), 2022-06-27
Supplement: s1 [file s1]

Supplemental Table S4. Components identified in protein complexes of full-length and truncated NS1 proteins<sup>a</sup>

| Protein group                                                      | Protein number | Protein list                                                                                                                                                                                                                                                                                                                                                                                             |
|--------------------------------------------------------------------|----------------|----------------------------------------------------------------------------------------------------------------------------------------------------------------------------------------------------------------------------------------------------------------------------------------------------------------------------------------------------------------------------------------------------------|
| Proteins identified in both analyses                               | 10             | FLG2, IMPDH2, CCT2, MDH2, DDX47, ECHDC1, PNO1, YWHAG, NSA2, DDX39B                                                                                                                                                                                                                                                                                                                                       |
| Proteins uniquely detected in full-length NS1 interactome analysis | 54             | HNRNPA3, ANXA2, PRPF19, CSNK2A1, FIBP, NCOA5, YWHAQ, HSPA4, SNRNP40, BRIX1, SNRPA1, YWHAH, PSMD6, PRKRA, RBMXL1, XAB2, STAU1, DHX8, DIAPH1, PTBP1, C1QBP, SEPTIN2, YTHDC2, RPRD1A, AHCTF1, DNAJB6, HSPBP1, CPVL, RPL7L1, CIT, IGF2BP2, QPCT, SAFB2, SAFB, FANCI, NIFK, MSI1, PIK3R2, FANCD2, ISY1, C1orf35, TUBA1A, DNAJB11, PABPN1, MBOAT7, HTT, YWHAB, CPOX, DYNC2H1, YWHAE, AKR1B1, NMNAT1, AUP1, ZFR |
| Proteins exclusively identified in tNS1 interactome analysis       | 36             | RPS11, HIST1H2BC, RPL12, PPL, HSPB1, MYO1B, DHRS4, TRNAU1AP, LGALS7B, SFN, RPL26, HIST1H2AD, EVPL, PPIA, LMNA, CASP14, KPRP, TRIM29, EPPK1, DSG1, RPL28, CALML5, ZC3HAV1L, SERPINB3, FLG, HAGH, AHNAK, DSP, LIG3, TUBA1C, STK38, LONP1, COQ5, SBSN, POF1B, IVL                                                                                                                                           |

<sup>a</sup> The information of proteins interacted with the full-length NS1 is adopted from Kuo et al., J Proteome Res. 2016, 15(5), 1639-48. The proteins listed in Table 1 are considered as the tNS1-interacting partners.
