# Supplementary material for: Interactome Profiling of N-Terminus-Truncated NS1 Protein of Influenza A Virus Reveals Role of 14-3-3γ in Virus Replication
Source: Pathogens. 2022 Jun 27;11(7):733. doi: 10.3390/pathogens11070733 (PMC9321973; doi:10.3390/pathogens11070733)
Supplement: Supplementary file 1 [file pathogens-11-00733-s001.zip]

Archive with 5 entries (5 files):
- Supplemental Figure S1.pdf
- Supplemental Table S1.xlsx
- Supplemental Table S2.xlsx
- Supplemental Table S3.xlsx
- Supplemental Table S4.pdf
