# Supplementary material for: Interactome Profiling of N-Terminus-Truncated NS1 Protein of Influenza A Virus Reveals Role of 14-3-3γ in Virus Replication
Source: Pathogens. 2022 Jun 27;11(7):733. doi: 10.3390/pathogens11070733 (PMC9321973; doi:10.3390/pathogens11070733)
Supplement: Supplementary file 1 [file pathogens-11-00733-s001.zip › Supplemental Table S1.xlsx]

## Sheet: Table S1-1
Supplemental Table S1-1. List of proteins identified in immunoprecipitation product of vector control (Replicate 1)
Protein name and gene name (GN)	Accession number	M.W. (kDa)	Protein probability	No. of unique peptide	No. of unique spectra	No. of total spectra	Percentage of total spectra	Sequence coverage	Peptide sequence	Best peptide probability	Mascot			No. of spectra			Calculated +1H peptide mass (AMU)	Peptide index
											ion score	identity score	delta ion score	+2H	+3H	+4H		start	stop
14-3-3 protein zeta/delta GN=YWHAZ	1433Z_HUMAN	27.7459	1	4	4	7	9.62e-05	0.192	LAEQAER	0.968	20.4	25	13.4	1	0	0	816.421	12	18
14-3-3 protein zeta/delta GN=YWHAZ	1433Z_HUMAN	27.7459	1	4	4	7	9.62e-05	0.192	NLLSVAYKNVVGAR	0.997	60.6	25	60.6	2	0	0	1503.86	42	55
14-3-3 protein zeta/delta GN=YWHAZ	1433Z_HUMAN	27.7459	1	4	4	7	9.62e-05	0.192	VVSSIEQKTEGAEK	0.997	60.9	25	58.5	2	0	0	1504.79	61	74
14-3-3 protein zeta/delta GN=YWHAZ	1433Z_HUMAN	27.7459	1	4	4	7	9.62e-05	0.192	YLAEVAAGDDKK	0.997	66.4	25	55	2	0	0	1279.65	128	139
4F2 cell-surface antigen heavy chain GN=SLC3A2	4F2_HUMAN	67.9964	1	3	4	7	9.62e-05	0.0714	IKVAEDEAEAAAAAK	0.997	60.1	25	53.6	2	1	0	1486.77	146	160
4F2 cell-surface antigen heavy chain GN=SLC3A2	4F2_HUMAN	67.9964	1	3	4	7	9.62e-05	0.0714	FTGLSKEELLK	0.997	46	25	44.7	2	0	0	1264.71	161	171
4F2 cell-surface antigen heavy chain GN=SLC3A2	4F2_HUMAN	67.9964	1	3	4	7	9.62e-05	0.0714	IGDLQAFQGHGAGNLAGLK	0.996	22.1	25	22.1	0	2	0	1866.98	227	245
Aldehyde dehydrogenase family 16 member A1 GN=ALDH16A1	A16A1_HUMAN	85.1268	1	6	6	10	0.000137	0.0898	LAEVIQKHQR	0.987	18.3	25	14.9	0	2	0	1221.71	108	117
Aldehyde dehydrogenase family 16 member A1 GN=ALDH16A1	A16A1_HUMAN	85.1268	1	6	6	10	0.000137	0.0898	VAFCGAPEEGR	0.997	38.5	25	38.5	2	0	0	1192.54	246	256
Aldehyde dehydrogenase family 16 member A1 GN=ALDH16A1	A16A1_HUMAN	85.1268	1	6	6	10	0.000137	0.0898	GLDGAVDMGAR	0.997	48.1	25	26.7	1	0	0	1061.5	335	345
Aldehyde dehydrogenase family 16 member A1 GN=ALDH16A1	A16A1_HUMAN	85.1268	1	6	6	10	0.000137	0.0898	GAAACDLVQR	0.997	44.3	25	32.9	2	0	0	1060.52	346	355
Aldehyde dehydrogenase family 16 member A1 GN=ALDH16A1	A16A1_HUMAN	85.1268	1	6	6	10	0.000137	0.0898	AAEAEVELSAR	0.968	20.8	25	0	1	0	0	1145.58	619	629
Aldehyde dehydrogenase family 16 member A1 GN=ALDH16A1	A16A1_HUMAN	85.1268	1	6	6	10	0.000137	0.0898	VQAQGHTLQVAGLRGPVLR	0.996	21.6	25	21.6	0	2	0	2000.15	638	656
Aladin GN=AAAS	AAAS_HUMAN	59.5741	0.998	2	2	2	2.75e-05	0.0421	ILATTPSAVFR	0.981	39.3	25	34.7	1	0	0	1175.68	302	312
Aladin GN=AAAS	AAAS_HUMAN	59.5741	0.998	2	2	2	2.75e-05	0.0421	VQDGKPVILLFR	0.997	40.1	25	40.1	1	0	0	1384.83	421	432
Neutral amino acid transporter B(0) GN=SLC1A5	AAAT_HUMAN	56.5998	1	2	2	4	5.49e-05	0.0425	NIFPSNLVSAAFR	0.997	43.7	25	37.4	3	0	0	1435.77	190	202
Neutral amino acid transporter B(0) GN=SLC1A5	AAAT_HUMAN	56.5998	1	2	2	4	5.49e-05	0.0425	LGPEGELLIR	0.984	23.4	25	20.8	1	0	0	1096.64	248	257
5'-AMP-activated protein kinase subunit gamma-1 GN=PRKAG1	AAKG1_HUMAN	37.5798	0.998	2	2	3	4.12e-05	0.0665	AFFALVTNGVR	0.997	39.5	25	39.5	1	0	0	1194.66	60	70
5'-AMP-activated protein kinase subunit gamma-1 GN=PRKAG1	AAKG1_HUMAN	37.5798	0.998	2	2	3	4.12e-05	0.0665	TYNNLDVSVTK	0.997	44.1	25	44.1	2	0	0	1253.64	254	264
Alpha-aminoadipic semialdehyde synthase, mitochondrial GN=AASS	AASS_HUMAN	102.135	1	2	2	3	4.12e-05	0.0302	SIGPLTFVFTGTGNVSK	0.997	36.6	25	36.6	2	0	0	1724.92	213	229
Alpha-aminoadipic semialdehyde synthase, mitochondrial GN=AASS	AASS_HUMAN	102.135	1	2	2	3	4.12e-05	0.0302	TVGLPTAMAAK	0.997	30.3	25	20.6	1	0	0	1059.59	873	883
Aspartate aminotransferase, mitochondrial GN=GOT2	AATM_HUMAN	47.5186	1	4	5	8	0.00011	0.112	ASAELALGENSEVLK	0.997	51.3	25	48.2	2	0	0	1530.8	108	122
Aspartate aminotransferase, mitochondrial GN=GOT2	AATM_HUMAN	47.5186	1	4	5	8	0.00011	0.112	FVTVQTISGTGALR	0.997	111	25	110	2	0	0	1449.81	126	139
Aspartate aminotransferase, mitochondrial GN=GOT2	AATM_HUMAN	47.5186	1	4	5	8	0.00011	0.112	DAGMQLQGYR	0.997	32.5	25	32.5	2	0	0	1138.53	171	180
Aspartate aminotransferase, mitochondrial GN=GOT2	AATM_HUMAN	47.5186	1	4	5	8	0.00011	0.112	TQLVSNLKK	0.983	23.2	25	23.2	2	0	0	1030.63	356	364
ATP-binding cassette sub-family B member 7, mitochondrial GN=ABCB7	ABCB7_HUMAN	82.6432	0.998	2	2	3	4.12e-05	0.0293	VAISLGFLGGAK	0.997	85.3	25	80.2	2	0	0	1132.67	140	151
ATP-binding cassette sub-family B member 7, mitochondrial GN=ABCB7	ABCB7_HUMAN	82.6432	0.998	2	2	3	4.12e-05	0.0293	AGAAFFNEVR	0.997	44.5	25	38.5	1	0	0	1081.54	201	210
ATP-binding cassette sub-family D member 3 GN=ABCD3	ABCD3_HUMAN	75.4792	1	9	10	14	0.000192	0.167	SGKPPLQNNEK	0.966	21.3	25	21.3	1	0	0	1211.64	40	50
ATP-binding cassette sub-family D member 3 GN=ABCD3	ABCD3_HUMAN	75.4792	1	9	10	14	0.000192	0.167	AVVDKVFFSR	0.997	40.1	25	32.6	1	0	0	1167.65	57	66
ATP-binding cassette sub-family D member 3 GN=ABCD3	ABCD3_HUMAN	75.4792	1	9	10	14	0.000192	0.167	MGNLDNR	0.993	25.9	25	21.6	1	0	0	819.378	175	181
ATP-binding cassette sub-family D member 3 GN=ABCD3	ABCD3_HUMAN	75.4792	1	9	10	14	0.000192	0.167	IANPDQLLTQDVEK	0.997	66.9	25	61.6	2	0	0	1583.83	182	195
ATP-binding cassette sub-family D member 3 GN=ABCD3	ABCD3_HUMAN	75.4792	1	9	10	14	0.000192	0.167	LITNSEEIAFYNGNKR	0.997	29.4	25	27.7	0	2	0	1868.95	272	287
ATP-binding cassette sub-family D member 3 GN=ABCD3	ABCD3_HUMAN	75.4792	1	9	10	14	0.000192	0.167	STHSELLEDYYQSGR	0.997	37.5	25	37.5	1	2	0	1784.81	348	362
ATP-binding cassette sub-family D member 3 GN=ABCD3	ABCD3_HUMAN	75.4792	1	9	10	14	0.000192	0.167	IVLAGREMTR	0.996	29.1	25	24.2	1	0	0	1145.65	374	383
ATP-binding cassette sub-family D member 3 GN=ABCD3	ABCD3_HUMAN	75.4792	1	9	10	14	0.000192	0.167	SGANVLICGPNGCGK	0.997	61.5	25	61.5	2	0	0	1503.7	465	479
ATP-binding cassette sub-family D member 3 GN=ABCD3	ABCD3_HUMAN	75.4792	1	9	10	14	0.000192	0.167	VLGELWPLFGGR	0.994	26.7	25	26.2	1	0	0	1343.75	485	496
ATP-binding cassette sub-family F member 2 GN=ABCF2	ABCF2_HUMAN	71.2925	1	13	19	32	0.00044	0.18	YGLIGLNGIGK	0.997	32.2	25	23.9	2	0	0	1104.64	114	124
ATP-binding cassette sub-family F member 2 GN=ABCF2	ABCF2_HUMAN	71.2925	1	13	19	32	0.00044	0.18	SMLLSAIGKR	0.997	30.4	25	19.4	2	0	0	1091.62	125	134
ATP-binding cassette sub-family F member 2 GN=ABCF2	ABCF2_HUMAN	71.2925	1	13	19	32	0.00044	0.18	EVPIPEHIDIYHLTR	0.997	53.1	25	51.1	1	1	0	1831.97	135	149
ATP-binding cassette sub-family F member 2 GN=ABCF2	ABCF2_HUMAN	71.2925	1	13	19	32	0.00044	0.18	ILHGLGFTPAMQR	0.997	44.9	25	38.8	4	2	0	1440.78	211	223
ATP-binding cassette sub-family F member 2 GN=ABCF2	ABCF2_HUMAN	71.2925	1	13	19	32	0.00044	0.18	YYTGNYDQYVK	0.997	52.1	25	49.5	2	0	0	1413.63	305	315
ATP-binding cassette sub-family F member 2 GN=ABCF2	ABCF2_HUMAN	71.2925	1	13	19	32	0.00044	0.18	VALVGPNGAGK	0.982	22.5	25	22.5	1	0	0	982.568	426	436
ATP-binding cassette sub-family F member 2 GN=ABCF2	ABCF2_HUMAN	71.2925	1	13	19	32	0.00044	0.18	LLTGELLPTDGMIR	0.997	48.3	25	48.1	4	0	0	1544.84	442	455
ATP-binding cassette sub-family F member 2 GN=ABCF2	ABCF2_HUMAN	71.2925	1	13	19	32	0.00044	0.18	LLTGELLPTDGMIRK	0.979	22.4	25	13.5	1	1	0	1656.94	442	456
ATP-binding cassette sub-family F member 2 GN=ABCF2	ABCF2_HUMAN	71.2925	1	13	19	32	0.00044	0.18	YGLTGKQQVSPIR	0.997	70.8	25	65.6	2	2	0	1446.81	503	515
ATP-binding cassette sub-family F member 2 GN=ABCF2	ABCF2_HUMAN	71.2925	1	13	19	32	0.00044	0.18	QQVSPIR	0.994	27.1	25	17.8	2	0	0	827.473	509	515
ATP-binding cassette sub-family F member 2 GN=ABCF2	ABCF2_HUMAN	71.2925	1	13	19	32	0.00044	0.18	SKLVDEEPQLTK	0.997	40.9	25	36.8	1	0	0	1386.75	607	618
ATP-binding cassette sub-family F member 2 GN=ABCF2	ABCF2_HUMAN	71.2925	1	13	19	32	0.00044	0.18	LVDEEPQLTK	0.997	31.1	25	14.7	2	0	0	1171.62	609	618
ATP-binding cassette sub-family F member 2 GN=ABCF2	ABCF2_HUMAN	71.2925	1	13	19	32	0.00044	0.18	LVDEEPQLTKR	0.997	37.5	25	30.5	2	0	0	1327.72	609	619
Activator of basal transcription 1 GN=ABT1	ABT1_HUMAN	31.0794	1	4	5	7	9.62e-05	0.125	NLLSAYGEVGR	0.997	58.6	25	48.2	2	0	0	1178.62	64	74
Activator of basal transcription 1 GN=ABT1	ABT1_HUMAN	31.0794	1	4	5	7	9.62e-05	0.125	RVAASLHNTPMGAR	0.972	15.1	25	15.1	0	1	0	1496.78	120	133
Activator of basal transcription 1 GN=ABT1	ABT1_HUMAN	31.0794	1	4	5	7	9.62e-05	0.125	VAASLHNTPMGAR	0.997	31.7	25	27.4	3	0	0	1324.68	121	133
Activator of basal transcription 1 GN=ABT1	ABT1_HUMAN	31.0794	1	4	5	7	9.62e-05	0.125	LRAEVAQAK	0.995	33.3	25	27	1	0	0	985.579	171	179
Acetyl-CoA carboxylase 1 GN=ACACA	ACACA_HUMAN	265.556	1	6	6	7	9.62e-05	0.0345	DFTVASPAEFVTR	0.997	45.3	25	45.3	1	0	0	1439.72	99	111
Acetyl-CoA carboxylase 1 GN=ACACA	ACACA_HUMAN	265.556	1	6	6	7	9.62e-05	0.0345	FGGNKVIEK	0.956	23.1	25	12.5	1	0	0	991.557	112	120
Acetyl-CoA carboxylase 1 GN=ACACA	ACACA_HUMAN	265.556	1	6	6	7	9.62e-05	0.0345	QVQAEVPGSPIFVMR	0.997	32.5	25	32.5	1	0	0	1657.87	336	350
Acetyl-CoA carboxylase 1 GN=ACACA	ACACA_HUMAN	265.556	1	6	6	7	9.62e-05	0.0345	ITSENPDEGFKPSSGTVQELNFR	0.997	27.4	25	27.4	0	1	0	2552.23	510	532
Acetyl-CoA carboxylase 1 GN=ACACA	ACACA_HUMAN	265.556	1	6	6	7	9.62e-05	0.0345	YLYLTPQDYKR	0.965	25.6	25	24.7	1	0	0	1459.76	1750	1760
Acetyl-CoA carboxylase 1 GN=ACACA	ACACA_HUMAN	265.556	1	6	6	7	9.62e-05	0.0345	AIGIGAYLVR	0.997	34.8	25	30.3	2	0	0	1032.62	1824	1833
Medium-chain specific acyl-CoA dehydrogenase, mitochondrial GN=ACADM	ACADM_HUMAN	46.5895	1	4	4	6	8.24e-05	0.116	ANWYFLLAR	0.997	37.1	25	36.9	2	0	0	1153.62	198	206
Medium-chain specific acyl-CoA dehydrogenase, mitochondrial GN=ACADM	ACADM_HUMAN	46.5895	1	4	4	6	8.24e-05	0.116	TRPVVAAGAVGLAQR	0.963	16.4	25	16.4	0	1	0	1465.86	280	294
Medium-chain specific acyl-CoA dehydrogenase, mitochondrial GN=ACADM	ACADM_HUMAN	46.5895	1	4	4	6	8.24e-05	0.116	ALDEATKYALER	0.997	52.1	25	39.8	1	0	0	1379.72	295	306
Medium-chain specific acyl-CoA dehydrogenase, mitochondrial GN=ACADM	ACADM_HUMAN	46.5895	1	4	4	6	8.24e-05	0.116	IYQIYEGTSQIQR	0.997	58.4	25	58.4	2	0	0	1598.82	396	408
Short/branched chain specific acyl-CoA dehydrogenase, mitochondrial GN=ACADSB	ACDSB_HUMAN	47.4871	1	4	4	7	9.62e-05	0.144	FAQEQIAPLVSTMDENSKMEK	0.984	18.5	25	18.5	0	1	0	2428.14	71	91
Short/branched chain specific acyl-CoA dehydrogenase, mitochondrial GN=ACADSB	ACDSB_HUMAN	47.4871	1	4	4	7	9.62e-05	0.144	YAIGSLNEGR	0.997	52.5	25	39.1	2	0	0	1079.55	285	294
Short/branched chain specific acyl-CoA dehydrogenase, mitochondrial GN=ACADSB	ACDSB_HUMAN	47.4871	1	4	4	7	9.62e-05	0.144	YYASEIAGQTTSK	0.997	84.8	25	82.5	2	0	0	1418.68	372	384
Short/branched chain specific acyl-CoA dehydrogenase, mitochondrial GN=ACADSB	ACDSB_HUMAN	47.4871	1	4	4	7	9.62e-05	0.144	IGTIYEGASNIQLNTIAK	0.997	78.4	25	70.7	2	0	0	1906.03	409	426
Apoptotic chromatin condensation inducer in the nucleus GN=ACIN1	ACINU_HUMAN	151.862	1	19	20	50	0.000687	0.147	VTDLKAALEQR	0.997	55.2	25	45.6	2	0	0	1243.7	77	87
Apoptotic chromatin condensation inducer in the nucleus GN=ACIN1	ACINU_HUMAN	151.862	1	19	20	50	0.000687	0.147	LKGALMLENLQK	0.997	46.2	25	44.2	1	0	0	1357.79	102	113
Apoptotic chromatin condensation inducer in the nucleus GN=ACIN1	ACINU_HUMAN	151.862	1	19	20	50	0.000687	0.147	GALMLENLQK	0.99	31.7	25	24.2	2	0	0	1116.61	104	113
Apoptotic chromatin condensation inducer in the nucleus GN=ACIN1	ACINU_HUMAN	151.862	1	19	20	50	0.000687	0.147	LSEGSQPAEEEEDQETPSR	0.997	39.9	25	38	2	0	0	2117.91	239	257
Apoptotic chromatin condensation inducer in the nucleus GN=ACIN1	ACINU_HUMAN	151.862	1	19	20	50	0.000687	0.147	SQEQEVLER	0.997	60.2	25	52	2	0	0	1117.55	328	336
Apoptotic chromatin condensation inducer in the nucleus GN=ACIN1	ACINU_HUMAN	151.862	1	19	20	50	0.000687	0.147	ASLVALPEQTASEEETPPPLLTK	0.997	51.7	25	51.7	1	1	0	2421.28	399	421
Apoptotic chromatin condensation inducer in the nucleus GN=ACIN1	ACINU_HUMAN	151.862	1	19	20	50	0.000687	0.147	SLSPGVSR	0.975	21.7	25.4	1.48	1	0	0	802.442	655	662
Apoptotic chromatin condensation inducer in the nucleus GN=ACIN1	ACINU_HUMAN	151.862	1	19	20	50	0.000687	0.147	TSTSSSSVQAR	0.997	59.5	25	49.9	6	0	0	1110.54	697	707
Apoptotic chromatin condensation inducer in the nucleus GN=ACIN1	ACINU_HUMAN	151.862	1	19	20	50	0.000687	0.147	RLSQPESAEK	0.996	28.4	25	19.5	2	0	0	1144.6	708	717
Apoptotic chromatin condensation inducer in the nucleus GN=ACIN1	ACINU_HUMAN	151.862	1	19	20	50	0.000687	0.147	KISVVSATK	0.997	46.9	25	34.9	4	0	0	932.577	823	831
Apoptotic chromatin condensation inducer in the nucleus GN=ACIN1	ACINU_HUMAN	151.862	1	19	20	50	0.000687	0.147	GVPAGNSDTEGGQPGR	0.997	72.7	25	69.4	5	0	0	1498.69	832	847
Apoptotic chromatin condensation inducer in the nucleus GN=ACIN1	ACINU_HUMAN	151.862	1	19	20	50	0.000687	0.147	WGASTATTQK	0.978	22.1	25	15.9	1	0	0	1050.52	851	860
Apoptotic chromatin condensation inducer in the nucleus GN=ACIN1	ACINU_HUMAN	151.862	1	19	20	50	0.000687	0.147	WGASTATTQKKPSISITTESLK	0.997	32.9	25	32.9	0	1	0	2335.25	851	872
Apoptotic chromatin condensation inducer in the nucleus GN=ACIN1	ACINU_HUMAN	151.862	1	19	20	50	0.000687	0.147	KPSISITTESLK	0.997	43.4	25	38.4	4	0	0	1303.75	861	872
Apoptotic chromatin condensation inducer in the nucleus GN=ACIN1	ACINU_HUMAN	151.862	1	19	20	50	0.000687	0.147	VTLGDTLTR	0.997	32.5	25	20.1	1	0	0	975.547	971	979
Apoptotic chromatin condensation inducer in the nucleus GN=ACIN1	ACINU_HUMAN	151.862	1	19	20	50	0.000687	0.147	VTLGDTLTRR	0.994	26.4	25	23.1	2	0	0	1131.65	971	980
Apoptotic chromatin condensation inducer in the nucleus GN=ACIN1	ACINU_HUMAN	151.862	1	19	20	50	0.000687	0.147	SGVSITIDDPVR	0.997	68	25	58.6	9	0	0	1258.66	987	998
Apoptotic chromatin condensation inducer in the nucleus GN=ACIN1	ACINU_HUMAN	151.862	1	19	20	50	0.000687	0.147	SHCFVTYSTVEEAVATR	0.997	62.1	25	62.1	1	0	0	1956.91	1050	1066
Apoptotic chromatin condensation inducer in the nucleus GN=ACIN1	ACINU_HUMAN	151.862	1	19	20	50	0.000687	0.147	LLDDLFRK	0.987	25.8	25	20.3	2	0	0	1019.59	1210	1217
ATP-citrate synthase GN=ACLY	ACLY_HUMAN	120.843	1	31	47	106	0.00146	0.301	AISEQTGKELLYK	0.997	50.2	25	50.2	2	0	0	1479.81	5	17
ATP-citrate synthase GN=ACLY	ACLY_HUMAN	120.843	1	31	47	106	0.00146	0.301	FICTTSAIQNR	0.997	53.3	25	48.5	2	0	0	1310.65	18	28
ATP-citrate synthase GN=ACLY	ACLY_HUMAN	120.843	1	31	47	106	0.00146	0.301	GKLGLVGVNLTLDGVK	0.997	44.1	25	44.1	2	2	0	1582.95	67	82
ATP-citrate synthase GN=ACLY	ACLY_HUMAN	120.843	1	31	47	106	0.00146	0.301	LGLVGVNLTLDGVK	0.997	56.2	25	55.9	2	0	0	1397.84	69	82
ATP-citrate synthase GN=ACLY	ACLY_HUMAN	120.843	1	31	47	106	0.00146	0.301	LGQEATVGK	0.997	65.8	25	55.1	4	0	0	902.494	89	97
ATP-citrate synthase GN=ACLY	ACLY_HUMAN	120.843	1	31	47	106	0.00146	0.301	LGQEATVGKATGFLK	0.997	57.3	25	51.6	2	2	0	1519.85	89	103
ATP-citrate synthase GN=ACLY	ACLY_HUMAN	120.843	1	31	47	106	0.00146	0.301	VDATADYICK	0.997	35.5	25	35.5	1	0	0	1155.54	221	230
ATP-citrate synthase GN=ACLY	ACLY_HUMAN	120.843	1	31	47	106	0.00146	0.301	EAYPEEAYIADLDAK	0.997	42.8	25	42.8	2	0	0	1697.79	245	259
ATP-citrate synthase GN=ACLY	ACLY_HUMAN	120.843	1	31	47	106	0.00146	0.301	TILSLMTR	0.997	33.7	25	30	5	0	0	934.539	322	329
ATP-citrate synthase GN=ACLY	ACLY_HUMAN	120.843	1	31	47	106	0.00146	0.301	RGGPNYQEGLR	0.997	39.8	25	35.2	2	0	0	1246.63	379	389
ATP-citrate synthase GN=ACLY	ACLY_HUMAN	120.843	1	31	47	106	0.00146	0.301	GGPNYQEGLR	0.997	36	25	22.6	2	0	0	1090.53	380	389
ATP-citrate synthase GN=ACLY	ACLY_HUMAN	120.843	1	31	47	106	0.00146	0.301	TASFSESRADEVAPAK	0.997	56	25	56	2	2	0	1665.81	453	468
ATP-citrate synthase GN=ACLY	ACLY_HUMAN	120.843	1	31	47	106	0.00146	0.301	AKPAMPQDSVPSPR	0.997	45.6	25	41.5	4	3	0	1480.76	470	483
ATP-citrate synthase GN=ACLY	ACLY_HUMAN	120.843	1	31	47	106	0.00146	0.301	SLQGKSTTLFSR	0.997	40.1	25	40.1	2	0	0	1324.72	484	495
ATP-citrate synthase GN=ACLY	ACLY_HUMAN	120.843	1	31	47	106	0.00146	0.301	SAYDSTMETMNYAQIR	0.997	52.4	25	52.4	4	0	0	1880.82	577	592
ATP-citrate synthase GN=ACLY	ACLY_HUMAN	120.843	1	31	47	106	0.00146	0.301	TIAIIAEGIPEALTR	0.997	73.1	25	73.1	7	0	0	1567.91	593	607
ATP-citrate synthase GN=ACLY	ACLY_HUMAN	120.843	1	31	47	106	0.00146	0.301	TIAIIAEGIPEALTRK	0.996	23.6	25	23.6	0	1	0	1696	593	608
ATP-citrate synthase GN=ACLY	ACLY_HUMAN	120.843	1	31	47	106	0.00146	0.301	ADQKGVTIIGPATVGGIKPGCFK	0.997	54.5	25	52.9	0	1	0	2314.26	613	635
ATP-citrate synthase GN=ACLY	ACLY_HUMAN	120.843	1	31	47	106	0.00146	0.301	GVTIIGPATVGGIKPGCFK	0.997	45.5	25	45.5	2	4	0	1872.04	617	635
ATP-citrate synthase GN=ACLY	ACLY_HUMAN	120.843	1	31	47	106	0.00146	0.301	IGNTGGMLDNILASK	0.997	56.5	25	56.5	5	0	0	1503.78	636	650
ATP-citrate synthase GN=ACLY	ACLY_HUMAN	120.843	1	31	47	106	0.00146	0.301	LYRPGSVAYVSR	0.997	44.9	25	40.5	2	4	0	1367.74	651	662
ATP-citrate synthase GN=ACLY	ACLY_HUMAN	120.843	1	31	47	106	0.00146	0.301	SGGMSNELNNIISR	0.997	95.6	25	92.9	9	0	0	1491.72	663	676
ATP-citrate synthase GN=ACLY	ACLY_HUMAN	120.843	1	31	47	106	0.00146	0.301	YQDTPGVK	0.997	31.7	25	19.9	2	0	0	907.452	704	711
ATP-citrate synthase GN=ACLY	ACLY_HUMAN	120.843	1	31	47	106	0.00146	0.301	MIVVLGEIGGTEEYKICR	0.997	39.8	25	39.8	0	2	0	2067.06	712	729
ATP-citrate synthase GN=ACLY	ACLY_HUMAN	120.843	1	31	47	106	0.00146	0.301	NQALKEAGVFVPR	0.997	74.5	25	70.2	4	2	0	1428.8	776	788
ATP-citrate synthase GN=ACLY	ACLY_HUMAN	120.843	1	31	47	106	0.00146	0.301	EAGVFVPR	0.981	22.9	25	17.2	1	0	0	874.478	781	788
ATP-citrate synthase GN=ACLY	ACLY_HUMAN	120.843	1	31	47	106	0.00146	0.301	AFDSGIIPMEFVNK	0.997	63.7	25	63.7	5	0	0	1583.78	949	962
ATP-citrate synthase GN=ACLY	ACLY_HUMAN	120.843	1	31	47	106	0.00146	0.301	EGKLIMGIGHR	0.997	33.9	25	29.1	1	3	0	1210.67	966	976
ATP-citrate synthase GN=ACLY	ACLY_HUMAN	120.843	1	31	47	106	0.00146	0.301	SINNPDMR	0.997	32.2	25	23.1	1	0	0	946.441	979	986
ATP-citrate synthase GN=ACLY	ACLY_HUMAN	120.843	1	31	47	106	0.00146	0.301	VQILKDYVR	0.997	44.5	25	37.6	2	0	0	1133.67	987	995
ATP-citrate synthase GN=ACLY	ACLY_HUMAN	120.843	1	31	47	106	0.00146	0.301	SMGFIGHYLDQKR	0.997	24.1	25	22.2	0	1	0	1551.77	1066	1078
Acyl-coenzyme A thioesterase 1 GN=ACOT1	ACOT1_HUMAN	46.2782	0.998	2	2	4	5.49e-05	0.0523	AATLILEPAGR	0.997	47.4	25	40.3	2	0	0	1111.65	2	12
Acyl-coenzyme A thioesterase 1 GN=ACOT1	ACOT1_HUMAN	46.2782	0.998	2	2	4	5.49e-05	0.0523	GLAPEQPVTLR	0.997	34.1	25	16.3	2	0	0	1180.67	25	35
Acyl-coenzyme A thioesterase 8 GN=ACOT8	ACOT8_HUMAN	35.9134	0.998	2	2	6	8.24e-05	0.0815	LFGGQIVGQALVAAAK	0.997	49.7	25	49.7	4	0	0	1542.9	54	69
Acyl-coenzyme A thioesterase 8 GN=ACOT8	ACOT8_HUMAN	35.9134	0.998	2	2	6	8.24e-05	0.0815	VKPQVSESKL	0.997	35.3	25	30.1	2	0	0	1114.65	310	319
Acyl-coenzyme A thioesterase 9, mitochondrial GN=ACOT9	ACOT9_HUMAN	49.9025	1	2	2	4	5.49e-05	0.0456	IAFSSTSLLK	0.997	37.1	25	36.3	2	0	0	1066.61	241	250
Acyl-coenzyme A thioesterase 9, mitochondrial GN=ACOT9	ACOT9_HUMAN	49.9025	1	2	2	4	5.49e-05	0.0456	SLEICHPQER	0.997	38.4	25	38.4	2	0	0	1268.61	295	304
Long-chain-fatty-acid--CoA ligase 3 GN=ACSL3	ACSL3_HUMAN	80.4231	1	3	3	6	8.24e-05	0.0556	LKDIVSLVPR	0.997	48.5	25	45.6	2	0	0	1139.71	221	230
Long-chain-fatty-acid--CoA ligase 3 GN=ACSL3	ACSL3_HUMAN	80.4231	1	3	3	6	8.24e-05	0.0556	IGYSSPQTLADQSSK	0.997	69	25	69	2	0	0	1581.78	349	363
Long-chain-fatty-acid--CoA ligase 3 GN=ACSL3	ACSL3_HUMAN	80.4231	1	3	3	6	8.24e-05	0.0556	LLLCGGAPLSATTQR	0.997	80.7	25	68.6	2	0	0	1557.84	447	461
Actin, cytoplasmic 2 GN=ACTG1	ACTG_HUMAN	41.7939	1	24	43	186	0.00255	0.555	AGFAGDDAPR	0.997	71.7	25	62	16	0	0	976.448	19	28
Actin, cytoplasmic 2 GN=ACTG1	ACTG_HUMAN	41.7939	1	24	43	186	0.00255	0.555	AVFPSIVGRPR	0.997	63.5	25	63.5	7	2	0	1198.71	29	39
Actin, cytoplasmic 2 GN=ACTG1	ACTG_HUMAN	41.7939	1	24	43	186	0.00255	0.555	HQGVMVGMGQK	0.997	57	25	57	8	0	0	1171.57	40	50
Actin, cytoplasmic 2 GN=ACTG1	ACTG_HUMAN	41.7939	1	24	43	186	0.00255	0.555	HQGVMVGMGQKDSYVGDEAQSK	0.997	46.6	25	46.6	0	8	0	2351.08	40	61
Actin, cytoplasmic 2 GN=ACTG1	ACTG_HUMAN	41.7939	1	24	43	186	0.00255	0.555	DSYVGDEAQSK	0.997	54.8	25	48.7	4	0	0	1198.52	51	61
Actin, cytoplasmic 2 GN=ACTG1	ACTG_HUMAN	41.7939	1	24	43	186	0.00255	0.555	DSYVGDEAQSKR	0.997	61.9	25	54.2	6	2	0	1354.62	51	62
Actin, cytoplasmic 2 GN=ACTG1	ACTG_HUMAN	41.7939	1	24	43	186	0.00255	0.555	RGILTLK	0.986	24	25	11.2	2	0	0	800.535	62	68
Actin, cytoplasmic 2 GN=ACTG1	ACTG_HUMAN	41.7939	1	24	43	186	0.00255	0.555	VAPEEHPVLLTEAPLNPK	0.997	59.6	25	42.9	10	8	0	1954.06	96	113
Actin, cytoplasmic 2 GN=ACTG1	ACTG_HUMAN	41.7939	1	24	43	186	0.00255	0.555	VAPEEHPVLLTEAPLNPKANR	0.997	37.1	25	29.1	0	1	0	2295.25	96	116
Actin, cytoplasmic 2 GN=ACTG1	ACTG_HUMAN	41.7939	1	24	43	186	0.00255	0.555	LDLAGRDLTDYLMK	0.997	44.5	25	39.2	6	7	0	1639.84	178	191
Actin, cytoplasmic 2 GN=ACTG1	ACTG_HUMAN	41.7939	1	24	43	186	0.00255	0.555	DLTDYLMK	0.979	22	25	16.5	3	0	0	1014.48	184	191
Actin, cytoplasmic 2 GN=ACTG1	ACTG_HUMAN	41.7939	1	24	43	186	0.00255	0.555	ILTERGYSFTTTAER	0.997	29.8	25	27.9	1	0	0	1744.89	192	206
Actin, cytoplasmic 2 GN=ACTG1	ACTG_HUMAN	41.7939	1	24	43	186	0.00255	0.555	GYSFTTTAER	0.997	59.4	25	53	8	0	0	1132.53	197	206
Actin, cytoplasmic 2 GN=ACTG1	ACTG_HUMAN	41.7939	1	24	43	186	0.00255	0.555	GYSFTTTAEREIVR	0.997	35.1	25	25.6	1	2	0	1629.82	197	210
Actin, cytoplasmic 2 GN=ACTG1	ACTG_HUMAN	41.7939	1	24	43	186	0.00255	0.555	LCYVALDFEQEMATAASSSSLEK	0.997	26.8	25	26.8	0	2	0	2566.17	216	238
Actin, cytoplasmic 2 GN=ACTG1	ACTG_HUMAN	41.7939	1	24	43	186	0.00255	0.555	SYELPDGQVITIGNER	0.997	75.3	25	68.6	21	0	0	1790.89	239	254
Actin, cytoplasmic 2 GN=ACTG1	ACTG_HUMAN	41.7939	1	24	43	186	0.00255	0.555	CDVDIRK	0.997	36.5	25	12.4	2	0	0	905.451	285	291
Actin, cytoplasmic 2 GN=ACTG1	ACTG_HUMAN	41.7939	1	24	43	186	0.00255	0.555	DLYANTVLSGGTTMYPGIADR	0.997	83.2	25	83.2	4	2	0	2231.07	292	312
Actin, cytoplasmic 2 GN=ACTG1	ACTG_HUMAN	41.7939	1	24	43	186	0.00255	0.555	MQKEITALAPSTMK	0.997	78.8	25	71.5	13	8	0	1564.81	313	326
Actin, cytoplasmic 2 GN=ACTG1	ACTG_HUMAN	41.7939	1	24	43	186	0.00255	0.555	EITALAPSTMK	0.997	62.4	25	41.1	18	0	0	1161.62	316	326
Actin, cytoplasmic 2 GN=ACTG1	ACTG_HUMAN	41.7939	1	24	43	186	0.00255	0.555	EITALAPSTMKIK	0.997	36	25	36	4	0	0	1402.8	316	328
Actin, cytoplasmic 2 GN=ACTG1	ACTG_HUMAN	41.7939	1	24	43	186	0.00255	0.555	IKIIAPPER	0.997	36.5	25	36.5	2	0	0	1036.65	327	335
Actin, cytoplasmic 2 GN=ACTG1	ACTG_HUMAN	41.7939	1	24	43	186	0.00255	0.555	QEYDESGPSIVHR	0.997	46.9	25	43.5	2	2	0	1516.7	360	372
Actin, cytoplasmic 2 GN=ACTG1	ACTG_HUMAN	41.7939	1	24	43	186	0.00255	0.555	QEYDESGPSIVHRK	0.997	49.4	25	47	2	2	0	1644.8	360	373
Alpha-centractin GN=ACTR1A	ACTZ_HUMAN	42.6152	1	8	10	23	0.000316	0.269	AGFAGDQIPK	0.997	66.7	25	50.1	4	0	0	1003.52	23	32
Alpha-centractin GN=ACTR1A	ACTZ_HUMAN	42.6152	1	8	10	23	0.000316	0.269	YCFPNYVGRPK	0.997	40.9	25	40.9	2	1	0	1400.68	33	43
Alpha-centractin GN=ACTR1A	ACTZ_HUMAN	42.6152	1	8	10	23	0.000316	0.269	VMAGALEGDIFIGPK	0.997	72.9	25	0	6	0	0	1517.8	47	61
Alpha-centractin GN=ACTR1A	ACTZ_HUMAN	42.6152	1	8	10	23	0.000316	0.269	IDIAGRDVSR	0.997	34	25	21.7	1	0	0	1101.6	183	192
Alpha-centractin GN=ACTR1A	ACTZ_HUMAN	42.6152	1	8	10	23	0.000316	0.269	EGYDFHSSSEFEIVK	0.997	36.2	25	25.2	1	0	0	1773.8	201	215
Alpha-centractin GN=ACTR1A	ACTZ_HUMAN	42.6152	1	8	10	23	0.000316	0.269	AQYYLPDGSTIEIGPSR	0.997	60.1	25	60.1	2	0	0	1866.92	239	255
Alpha-centractin GN=ACTR1A	ACTZ_HUMAN	42.6152	1	8	10	23	0.000316	0.269	TLFSNIVLSGGSTLFK	0.997	92.1	25	92.1	2	0	0	1683.93	293	308
Alpha-centractin GN=ACTR1A	ACTZ_HUMAN	42.6152	1	8	10	23	0.000316	0.269	ISAPQER	0.996	28.6	25	13.3	4	0	0	800.426	330	336
Proteasomal ubiquitin receptor ADRM1 GN=ADRM1	ADRM1_HUMAN	42.1543	0.998	2	2	4	5.49e-05	0.0663	GASNKYLVEFR	0.997	40.1	25	21.6	2	0	0	1283.67	17	27
Proteasomal ubiquitin receptor ADRM1 GN=ADRM1	ADRM1_HUMAN	42.1543	0.998	2	2	4	5.49e-05	0.0663	SQSAAVTPSSTTSSTR	0.997	64.8	25	64.6	2	0	0	1567.76	211	226
ADP/ATP translocase 1 GN=SLC25A4	ADT1_HUMAN	33.0654	0.999	2	2	3	4.12e-05	0.403	TAVAPIER	0.997	34.8	25	33.3	5	0	0	856.489	24	31
ADP/ATP translocase 1 GN=SLC25A4	ADT1_HUMAN	33.0654	0.999	2	2	3	4.12e-05	0.403	TAVAPIERVK	0.997	42.5	25	38.3	2	0	0	1083.65	24	33
ADP/ATP translocase 1 GN=SLC25A4	ADT1_HUMAN	33.0654	0.999	2	2	3	4.12e-05	0.403	VKLLLQVQHASK	0.997	57.6	25	57.6	4	2	0	1363.84	32	43
ADP/ATP translocase 1 GN=SLC25A4	ADT1_HUMAN	33.0654	0.999	2	2	3	4.12e-05	0.403	LLLQVQHASK	0.997	53	25	45.6	13	0	0	1136.68	34	43
ADP/ATP translocase 1 GN=SLC25A4	ADT1_HUMAN	33.0654	0.999	2	2	3	4.12e-05	0.403	GIIDCVVR	0.989	24.3	25	9.29	2	0	0	931.503	53	60
ADP/ATP translocase 1 GN=SLC25A4	ADT1_HUMAN	33.0654	0.999	2	2	3	4.12e-05	0.403	GIIDCVVRIPK	0.949	21.5	25	14.3	1	0	0	1269.73	53	63
ADP/ATP translocase 1 GN=SLC25A4	ADT1_HUMAN	33.0654	0.999	2	2	3	4.12e-05	0.403	YFPTQALNFAFK	0.997	53.1	25	43.3	4	0	0	1446.74	81	92
ADP/ATP translocase 1 GN=SLC25A4	ADT1_HUMAN	33.0654	0.999	2	2	3	4.12e-05	0.403	YFPTQALNFAFKDK	0.997	53	25	49.1	2	0	0	1689.86	81	94
ADP/ATP translocase 1 GN=SLC25A4	ADT1_HUMAN	33.0654	0.999	2	2	3	4.12e-05	0.403	YFAGNLASGGAAGATSLCFVYPLDFAR	0.997	68.8	25	68.8	1	0	0	2796.35	112	138
ADP/ATP translocase 1 GN=SLC25A4	ADT1_HUMAN	33.0654	0.999	2	2	3	4.12e-05	0.403	TRLAADVGK	0.997	31.9	25	7.68	4	0	0	930.537	139	147
ADP/ATP translocase 1 GN=SLC25A4	ADT1_HUMAN	33.0654	0.999	2	2	3	4.12e-05	0.403	LAADVGKGAAQR	0.997	66.3	25	53.8	2	0	0	1156.64	141	152
ADP/ATP translocase 1 GN=SLC25A4	ADT1_HUMAN	33.0654	0.999	2	2	3	4.12e-05	0.403	EFHGLGDCIIK	0.968	21	25	18.6	1	0	0	1288.64	153	163
ADP/ATP translocase 1 GN=SLC25A4	ADT1_HUMAN	33.0654	0.999	2	2	3	4.12e-05	0.403	AAYFGVYDTAK	0.997	56.2	25	54.2	3	0	0	1205.58	189	199
ADP/ATP translocase 1 GN=SLC25A4	ADT1_HUMAN	33.0654	0.999	2	2	3	4.12e-05	0.403	AFFKGAWSNVLR	0.997	36.5	25	36.5	2	1	0	1395.75	269	280
ADP/ATP translocase 1 GN=SLC25A4	ADT1_HUMAN	33.0654	0.999	2	2	3	4.12e-05	0.403	GAWSNVLR	0.997	40.9	25	26.9	2	0	0	902.484	273	280
ADP/ATP translocase 2 GN=SLC25A5	ADT2_HUMAN	32.8535	1	24	27	76	0.00104	0.497	DFLAGGVAAAISK	0.997	99.9	25	89.8	3	0	0	1219.67	11	23
ADP/ATP translocase 2 GN=SLC25A5	ADT2_HUMAN	32.8535	1	24	27	76	0.00104	0.497	TAVAPIER	0.997	34.8	25	33.3	5	0	0	856.489	24	31
ADP/ATP translocase 2 GN=SLC25A5	ADT2_HUMAN	32.8535	1	24	27	76	0.00104	0.497	TAVAPIERVK	0.997	42.5	25	38.3	2	0	0	1083.65	24	33
ADP/ATP translocase 2 GN=SLC25A5	ADT2_HUMAN	32.8535	1	24	27	76	0.00104	0.497	VKLLLQVQHASK	0.997	57.6	25	57.6	4	2	0	1363.84	32	43
ADP/ATP translocase 2 GN=SLC25A5	ADT2_HUMAN	32.8535	1	24	27	76	0.00104	0.497	LLLQVQHASK	0.997	53	25	45.6	13	0	0	1136.68	34	43
ADP/ATP translocase 2 GN=SLC25A5	ADT2_HUMAN	32.8535	1	24	27	76	0.00104	0.497	GIIDCVVR	0.989	24.3	25	9.29	2	0	0	931.503	53	60
ADP/ATP translocase 2 GN=SLC25A5	ADT2_HUMAN	32.8535	1	24	27	76	0.00104	0.497	GIIDCVVRIPK	0.949	21.5	25	14.3	1	0	0	1269.73	53	63
ADP/ATP translocase 2 GN=SLC25A5	ADT2_HUMAN	32.8535	1	24	27	76	0.00104	0.497	IPKEQGVLSFWR	0.997	62.6	25	60	2	2	0	1459.81	61	72
ADP/ATP translocase 2 GN=SLC25A5	ADT2_HUMAN	32.8535	1	24	27	76	0.00104	0.497	EQGVLSFWR	0.996	30.3	25	27.5	6	0	0	1121.57	64	72
ADP/ATP translocase 2 GN=SLC25A5	ADT2_HUMAN	32.8535	1	24	27	76	0.00104	0.497	YFPTQALNFAFK	0.997	53.1	25	43.3	4	0	0	1446.74	81	92
ADP/ATP translocase 2 GN=SLC25A5	ADT2_HUMAN	32.8535	1	24	27	76	0.00104	0.497	YFPTQALNFAFKDK	0.997	53	25	49.1	2	0	0	1689.86	81	94
ADP/ATP translocase 2 GN=SLC25A5	ADT2_HUMAN	32.8535	1	24	27	76	0.00104	0.497	QIFLGGVDKR	0.997	47.4	25	36.8	3	0	0	1132.65	97	106
ADP/ATP translocase 2 GN=SLC25A5	ADT2_HUMAN	32.8535	1	24	27	76	0.00104	0.497	TRLAADVGK	0.997	31.9	25	7.68	4	0	0	930.537	139	147
ADP/ATP translocase 2 GN=SLC25A5	ADT2_HUMAN	32.8535	1	24	27	76	0.00104	0.497	LAADVGKAGAER	0.997	84.6	25	77.3	2	0	0	1157.63	141	152
ADP/ATP translocase 2 GN=SLC25A5	ADT2_HUMAN	32.8535	1	24	27	76	0.00104	0.497	AGAEREFR	0.981	22.2	25	0.24	3	0	0	935.469	148	155
ADP/ATP translocase 2 GN=SLC25A5	ADT2_HUMAN	32.8535	1	24	27	76	0.00104	0.497	EFRGLGDCLVK	0.997	39.8	25	31.8	1	0	0	1293.66	153	163
ADP/ATP translocase 2 GN=SLC25A5	ADT2_HUMAN	32.8535	1	24	27	76	0.00104	0.497	GLGDCLVK	0.989	26.5	25	15.8	1	0	0	861.45	156	163
ADP/ATP translocase 2 GN=SLC25A5	ADT2_HUMAN	32.8535	1	24	27	76	0.00104	0.497	GLGDCLVKIYK	0.997	61.2	25	54.1	2	0	0	1265.69	156	166
ADP/ATP translocase 2 GN=SLC25A5	ADT2_HUMAN	32.8535	1	24	27	76	0.00104	0.497	AAYFGIYDTAK	0.997	53	25	41.9	4	0	0	1219.6	189	199
ADP/ATP translocase 2 GN=SLC25A5	ADT2_HUMAN	32.8535	1	24	27	76	0.00104	0.497	KGTDIMYTGTLDCWR	0.997	47	25	47	1	0	0	1832.83	245	259
ADP/ATP translocase 2 GN=SLC25A5	ADT2_HUMAN	32.8535	1	24	27	76	0.00104	0.497	GTDIMYTGTLDCWR	0.987	26.9	25	26.9	1	0	0	1704.74	246	259
ADP/ATP translocase 2 GN=SLC25A5	ADT2_HUMAN	32.8535	1	24	27	76	0.00104	0.497	DEGGKAFFK	0.997	31	25	24.3	1	0	0	998.494	264	272
ADP/ATP translocase 2 GN=SLC25A5	ADT2_HUMAN	32.8535	1	24	27	76	0.00104	0.497	AFFKGAWSNVLR	0.997	36.5	25	36.5	2	1	0	1395.75	269	280
ADP/ATP translocase 2 GN=SLC25A5	ADT2_HUMAN	32.8535	1	24	27	76	0.00104	0.497	GAWSNVLR	0.997	40.9	25	26.9	2	0	0	902.484	273	280
ADP/ATP translocase 3 GN=SLC25A6	ADT3_HUMAN	32.8671	1	5	5	16	0.00022	0.477	DFLAGGIAAAISK	0.997	88.2	25	78.7	8	0	0	1233.68	11	23
ADP/ATP translocase 3 GN=SLC25A6	ADT3_HUMAN	32.8671	1	5	5	16	0.00022	0.477	TAVAPIER	0.997	34.8	25	33.3	5	0	0	856.489	24	31
ADP/ATP translocase 3 GN=SLC25A6	ADT3_HUMAN	32.8671	1	5	5	16	0.00022	0.477	TAVAPIERVK	0.997	42.5	25	38.3	2	0	0	1083.65	24	33
ADP/ATP translocase 3 GN=SLC25A6	ADT3_HUMAN	32.8671	1	5	5	16	0.00022	0.477	VKLLLQVQHASK	0.997	57.6	25	57.6	4	2	0	1363.84	32	43
ADP/ATP translocase 3 GN=SLC25A6	ADT3_HUMAN	32.8671	1	5	5	16	0.00022	0.477	LLLQVQHASK	0.997	53	25	45.6	13	0	0	1136.68	34	43
ADP/ATP translocase 3 GN=SLC25A6	ADT3_HUMAN	32.8671	1	5	5	16	0.00022	0.477	IPKEQGVLSFWR	0.997	62.6	25	60	2	2	0	1459.81	61	72
ADP/ATP translocase 3 GN=SLC25A6	ADT3_HUMAN	32.8671	1	5	5	16	0.00022	0.477	EQGVLSFWR	0.996	30.3	25	27.5	6	0	0	1121.57	64	72
ADP/ATP translocase 3 GN=SLC25A6	ADT3_HUMAN	32.8671	1	5	5	16	0.00022	0.477	YFPTQALNFAFK	0.997	53.1	25	43.3	4	0	0	1446.74	81	92
ADP/ATP translocase 3 GN=SLC25A6	ADT3_HUMAN	32.8671	1	5	5	16	0.00022	0.477	YFPTQALNFAFKDK	0.997	53	25	49.1	2	0	0	1689.86	81	94
ADP/ATP translocase 3 GN=SLC25A6	ADT3_HUMAN	32.8671	1	5	5	16	0.00022	0.477	YFAGNLASGGAAGATSLCFVYPLDFAR	0.997	68.8	25	68.8	1	0	0	2796.35	112	138
ADP/ATP translocase 3 GN=SLC25A6	ADT3_HUMAN	32.8671	1	5	5	16	0.00022	0.477	TRLAADVGK	0.997	31.9	25	7.68	4	0	0	930.537	139	147
ADP/ATP translocase 3 GN=SLC25A6	ADT3_HUMAN	32.8671	1	5	5	16	0.00022	0.477	LAADVGKSGTER	0.997	73.4	25	60.6	2	0	0	1203.63	141	152
ADP/ATP translocase 3 GN=SLC25A6	ADT3_HUMAN	32.8671	1	5	5	16	0.00022	0.477	EFRGLGDCLVK	0.997	39.8	25	31.8	1	0	0	1293.66	153	163
ADP/ATP translocase 3 GN=SLC25A6	ADT3_HUMAN	32.8671	1	5	5	16	0.00022	0.477	GLGDCLVK	0.989	26.5	25	15.8	1	0	0	861.45	156	163
ADP/ATP translocase 3 GN=SLC25A6	ADT3_HUMAN	32.8671	1	5	5	16	0.00022	0.477	GLGDCLVKITK	0.997	38.8	25	33.1	2	0	0	1203.68	156	166
ADP/ATP translocase 3 GN=SLC25A6	ADT3_HUMAN	32.8671	1	5	5	16	0.00022	0.477	AAYFGVYDTAK	0.997	56.2	25	54.2	3	0	0	1205.58	189	199
ADP/ATP translocase 3 GN=SLC25A6	ADT3_HUMAN	32.8671	1	5	5	16	0.00022	0.477	DEGGKAFFK	0.997	31	25	24.3	1	0	0	998.494	264	272
ADP/ATP translocase 3 GN=SLC25A6	ADT3_HUMAN	32.8671	1	5	5	16	0.00022	0.477	AFFKGAWSNVLR	0.997	36.5	25	36.5	2	1	0	1395.75	269	280
ADP/ATP translocase 3 GN=SLC25A6	ADT3_HUMAN	32.8671	1	5	5	16	0.00022	0.477	GAWSNVLR	0.997	40.9	25	26.9	2	0	0	902.484	273	280
AFG3-like protein 2 GN=AFG3L2	AFG32_HUMAN	88.5868	1	6	6	8	0.00011	0.0778	TGRGMGGLFSVGETTAK	0.997	27.7	25	27.7	0	1	0	1684.83	281	297
AFG3-like protein 2 GN=AFG3L2	AFG32_HUMAN	88.5868	1	6	6	8	0.00011	0.0778	GMGGLFSVGETTAK	0.997	41.6	25	39.9	2	0	0	1354.67	284	297
AFG3-like protein 2 GN=AFG3L2	AFG32_HUMAN	88.5868	1	6	6	8	0.00011	0.0778	GAILTGPPGTGKTLLAK	0.997	40.5	25	40.5	1	0	0	1594.95	343	359
AFG3-like protein 2 GN=AFG3L2	AFG32_HUMAN	88.5868	1	6	6	8	0.00011	0.0778	VRDLFALAR	0.997	32.2	25	27.4	1	0	0	1060.63	389	397
AFG3-like protein 2 GN=AFG3L2	AFG32_HUMAN	88.5868	1	6	6	8	0.00011	0.0778	VSEEIFFGR	0.997	64	25	48.8	2	0	0	1083.55	633	641
AFG3-like protein 2 GN=AFG3L2	AFG32_HUMAN	88.5868	1	6	6	8	0.00011	0.0778	VGQISFDLPR	0.997	50.5	25	40.2	1	0	0	1131.62	670	679
Acylglycerol kinase, mitochondrial GN=AGK	AGK_HUMAN	47.138	0.998	2	2	3	4.12e-05	0.0332	KATVFLNPAACK	0.997	37.5	25	37.5	2	0	0	1319.71	62	73
Acylglycerol kinase, mitochondrial GN=AGK	AGK_HUMAN	47.138	0.998	2	2	3	4.12e-05	0.0332	ATVFLNPAACKGK	0.997	36.4	25	36.4	1	0	0	1376.74	63	75
Phosphoacetylglucosamine mutase GN=PGM3	AGM1_HUMAN	59.8524	1	3	4	5	6.87e-05	0.0535	VQVADRR	0.968	21.5	25	3.54	1	0	0	843.48	454	460
Phosphoacetylglucosamine mutase GN=PGM3	AGM1_HUMAN	59.8524	1	3	4	5	6.87e-05	0.0535	VISTTDAER	0.974	21.1	25	17.8	1	0	0	991.505	461	469
Phosphoacetylglucosamine mutase GN=PGM3	AGM1_HUMAN	59.8524	1	3	4	5	6.87e-05	0.0535	AFVRPSGTEDVVR	0.997	41.8	25	39.8	1	2	0	1432.75	493	505
Activator of 90 kDa heat shock protein ATPase homolog 1 GN=AHSA1	AHSA1_HUMAN	38.2744	1	4	4	7	9.62e-05	0.121	WIVEER	0.997	30	25	16.8	1	0	0	831.436	11	16
Activator of 90 kDa heat shock protein ATPase homolog 1 GN=AHSA1	AHSA1_HUMAN	38.2744	1	4	4	7	9.62e-05	0.121	TQARPVGVK	0.997	40.2	25	36.2	2	0	0	955.568	195	203
Activator of 90 kDa heat shock protein ATPase homolog 1 GN=AHSA1	AHSA1_HUMAN	38.2744	1	4	4	7	9.62e-05	0.121	GIPAPEEERTR	0.997	53.6	25	51.5	2	0	0	1254.64	306	316
Activator of 90 kDa heat shock protein ATPase homolog 1 GN=AHSA1	AHSA1_HUMAN	38.2744	1	4	4	7	9.62e-05	0.121	YYFEGIKQTFGYGAR	0.997	26.9	25	26.9	0	2	0	1799.88	322	336
Apoptosis-inducing factor 1, mitochondrial GN=AIFM1	AIFM1_HUMAN	66.9015	1	11	13	23	0.000316	0.202	ISGLGLTPEQK	0.997	56.6	25	46.2	2	0	0	1142.64	99	109
Apoptosis-inducing factor 1, mitochondrial GN=AIFM1	AIFM1_HUMAN	66.9015	1	11	13	23	0.000316	0.202	ISGLGLTPEQKQK	0.997	41.6	25	36	2	0	0	1398.8	99	111
Apoptosis-inducing factor 1, mitochondrial GN=AIFM1	AIFM1_HUMAN	66.9015	1	11	13	23	0.000316	0.202	VLIVSEDPELPYMRPPLSK	0.997	29.7	25	29.7	0	2	0	2183.18	159	177
Apoptosis-inducing factor 1, mitochondrial GN=AIFM1	AIFM1_HUMAN	66.9015	1	11	13	23	0.000316	0.202	CLIATGGTPR	0.997	60.1	25	45.8	2	0	0	1045.55	256	265
Apoptosis-inducing factor 1, mitochondrial GN=AIFM1	AIFM1_HUMAN	66.9015	1	11	13	23	0.000316	0.202	SLSAIDRAGAEVK	0.997	56.9	25	44.3	2	0	0	1316.72	266	278
Apoptosis-inducing factor 1, mitochondrial GN=AIFM1	AIFM1_HUMAN	66.9015	1	11	13	23	0.000316	0.202	ALGTEVIQLFPEK	0.997	38.6	25	38.6	2	0	0	1444.8	325	337
Apoptosis-inducing factor 1, mitochondrial GN=AIFM1	AIFM1_HUMAN	66.9015	1	11	13	23	0.000316	0.202	ALGTEVIQLFPEKGNMGK	0.997	51.1	25	49.5	0	4	0	1948.02	325	342
Apoptosis-inducing factor 1, mitochondrial GN=AIFM1	AIFM1_HUMAN	66.9015	1	11	13	23	0.000316	0.202	EGVKVMPNAIVQSVGVSSGK	0.997	43.4	25	43.4	0	3	0	1986.07	359	378
Apoptosis-inducing factor 1, mitochondrial GN=AIFM1	AIFM1_HUMAN	66.9015	1	11	13	23	0.000316	0.202	VMPNAIVQSVGVSSGK	0.997	52.7	25	52.2	2	0	0	1572.84	363	378
Apoptosis-inducing factor 1, mitochondrial GN=AIFM1	AIFM1_HUMAN	66.9015	1	11	13	23	0.000316	0.202	VETDHIVAAVGLEPNVELAK	0.997	24.7	25	24.7	0	1	0	2104.13	389	408
Apoptosis-inducing factor 1, mitochondrial GN=AIFM1	AIFM1_HUMAN	66.9015	1	11	13	23	0.000316	0.202	SATEQSGTGIR	0.997	69.2	25	49.5	1	0	0	1106.54	519	529
Aminoacyl tRNA synthase complex-interacting multifunctional protein 1 GN=AIMP1	AIMP1_HUMAN	34.353	1	4	6	13	0.000179	0.176	AILQATLREEK	0.997	35.4	25	27.5	2	0	0	1271.73	36	46
Aminoacyl tRNA synthase complex-interacting multifunctional protein 1 GN=AIMP1	AIMP1_HUMAN	34.353	1	4	6	13	0.000179	0.176	KQQSIAGSADSKPIDVSR	0.997	34.2	25	34.2	0	2	0	1886.99	137	154
Aminoacyl tRNA synthase complex-interacting multifunctional protein 1 GN=AIMP1	AIMP1_HUMAN	34.353	1	4	6	13	0.000179	0.176	IGCIITAR	0.997	64.8	25	39.3	4	0	0	903.508	159	166
Aminoacyl tRNA synthase complex-interacting multifunctional protein 1 GN=AIMP1	AIMP1_HUMAN	34.353	1	4	6	13	0.000179	0.176	TVVSGLVNHVPLEQMQNR	0.997	39.9	25	38.8	1	4	0	2037.05	188	205
Aminoacyl tRNA synthase complex-interacting multifunctional protein 2 GN=AIMP2	AIMP2_HUMAN	35.3493	1	5	6	10	0.000137	0.188	LYELKAAVDGLSK	0.997	50.7	25	42.8	2	0	0	1406.79	66	78
Aminoacyl tRNA synthase complex-interacting multifunctional protein 2 GN=AIMP2	AIMP2_HUMAN	35.3493	1	5	6	10	0.000137	0.188	FSIQTMCPIEGEGNIAR	0.997	66.9	25	66.9	4	0	0	1938.9	199	215
Aminoacyl tRNA synthase complex-interacting multifunctional protein 2 GN=AIMP2	AIMP2_HUMAN	35.3493	1	5	6	10	0.000137	0.188	FLFSLFGQK	0.976	21.4	25	15.7	1	0	0	1086.6	216	224
Aminoacyl tRNA synthase complex-interacting multifunctional protein 2 GN=AIMP2	AIMP2_HUMAN	35.3493	1	5	6	10	0.000137	0.188	SMNSALGK	0.986	23.9	25	14.9	1	0	0	807.403	258	265
Aminoacyl tRNA synthase complex-interacting multifunctional protein 2 GN=AIMP2	AIMP2_HUMAN	35.3493	1	5	6	10	0.000137	0.188	SCENLAPFNTALK	0.997	47	25	35.1	2	0	0	1464.72	305	317
Alpha-internexin GN=INA	AINX_HUMAN	55.3923	1	8	8	10	0.000137	0.214	LSGAGGAGGFR	0.997	43.1	25	39.6	1	0	0	949.485	29	39
Alpha-internexin GN=INA	AINX_HUMAN	55.3923	1	8	8	10	0.000137	0.214	ALEAELAALR	0.997	47	25	26.8	2	0	0	1056.6	121	130
Alpha-internexin GN=INA	AINX_HUMAN	55.3923	1	8	8	10	0.000137	0.214	AQLEEASSAR	0.997	44	25	39.3	1	0	0	1061.52	152	161
Alpha-internexin GN=INA	AINX_HUMAN	55.3923	1	8	8	10	0.000137	0.214	SQALLERDGLAEEVQR	0.996	33.7	25	21.9	1	0	0	1813.94	162	177
Alpha-internexin GN=INA	AINX_HUMAN	55.3923	1	8	8	10	0.000137	0.214	DVDGATLAR	0.996	29.4	25	23.9	1	0	0	917.469	202	210
Alpha-internexin GN=INA	AINX_HUMAN	55.3923	1	8	8	10	0.000137	0.214	FANLNEQAAR	0.997	74	25	41.2	2	0	0	1133.57	291	300
Alpha-internexin GN=INA	AINX_HUMAN	55.3923	1	8	8	10	0.000137	0.214	TIEIEGLRGANESLER	0.962	18.2	25	16.1	0	1	0	1786.93	323	338
Alpha-internexin GN=INA	AINX_HUMAN	55.3923	1	8	8	10	0.000137	0.214	HLREYQDLLNVK	0.997	25.6	25	24.4	0	2	0	1527.83	375	386
Alpha-internexin GN=INA	AINX_HUMAN	55.3923	1	8	8	10	0.000137	0.214	SNIEETTISSQKI	0.997	50.7	25	50.7	1	0	0	1449.74	487	499
Aldehyde dehydrogenase X, mitochondrial GN=ALDH1B1	AL1B1_HUMAN	57.2066	1	3	3	5	6.87e-05	0.058	LAPALATGNTVVMK	0.997	55.6	25	51.8	2	0	0	1385.78	196	209
Aldehyde dehydrogenase X, mitochondrial GN=ALDH1B1	AL1B1_HUMAN	57.2066	1	3	3	5	6.87e-05	0.058	LLCGGER	0.97	21.2	25	10.8	2	0	0	804.403	384	390
Aldehyde dehydrogenase X, mitochondrial GN=ALDH1B1	AL1B1_HUMAN	57.2066	1	3	3	5	6.87e-05	0.058	TVTIKVPQK	0.995	31.1	25	19.5	1	0	0	1013.64	507	515
Mitochondrial 10-formyltetrahydrofolate dehydrogenase GN=ALDH1L2	AL1L2_HUMAN	101.748	1	5	5	9	0.000124	0.0791	AMVEAVQLIADGKAPR	0.979	16.4	25	13.4	0	1	0	1668.91	197	212
Mitochondrial 10-formyltetrahydrofolate dehydrogenase GN=ALDH1L2	AL1L2_HUMAN	101.748	1	5	5	9	0.000124	0.0791	NGLVLFGNDGK	0.985	28.4	25	28.4	1	0	0	1133.6	296	306
Mitochondrial 10-formyltetrahydrofolate dehydrogenase GN=ALDH1L2	AL1L2_HUMAN	101.748	1	5	5	9	0.000124	0.0791	NGLVLFGNDGKALTVR	0.97	15.4	25	15.4	0	1	0	1673.93	296	311
Mitochondrial 10-formyltetrahydrofolate dehydrogenase GN=ALDH1L2	AL1L2_HUMAN	101.748	1	5	5	9	0.000124	0.0791	SAACLAAGNTLVLKPAQVTPLTALK	0.997	38.7	25	38.7	0	2	0	2508.42	605	629
Mitochondrial 10-formyltetrahydrofolate dehydrogenase GN=ALDH1L2	AL1L2_HUMAN	101.748	1	5	5	9	0.000124	0.0791	GVINIIPGSGGIAGQR	0.997	51.3	25	51.3	4	0	0	1508.85	642	657
Serum albumin GN=ALB	ALBU_HUMAN	69.3669	1	5	6	109	0.0015	0.0755	CASLQKFGER	0.997	60.1	25	46.6	8	0	0	1195.59	224	233
Serum albumin GN=ALB	ALBU_HUMAN	69.3669	1	5	6	109	0.0015	0.0755	YICENQDSISSK	0.997	29.6	25	11.4	12	0	0	1443.64	287	298
Serum albumin GN=ALB	ALBU_HUMAN	69.3669	1	5	6	109	0.0015	0.0755	KVPQVSTPTLVEVSR	0.997	71.8	25	71.8	40	36	0	1639.94	438	452
Serum albumin GN=ALB	ALBU_HUMAN	69.3669	1	5	6	109	0.0015	0.0755	VPQVSTPTLVEVSR	0.992	26	25	26	2	0	0	1511.84	439	452
Serum albumin GN=ALB	ALBU_HUMAN	69.3669	1	5	6	109	0.0015	0.0755	CCTESLVNR	0.997	52.5	25	47.8	11	0	0	1138.5	500	508
Fructose-bisphosphate aldolase A GN=ALDOA	ALDOA_HUMAN	39.4206	1	4	4	6	8.24e-05	0.148	IVAPGKGILAADESTGSIAK	0.997	40.9	25	40.9	0	2	0	1898.06	23	42
Fructose-bisphosphate aldolase A GN=ALDOA	ALDOA_HUMAN	39.4206	1	4	4	6	8.24e-05	0.148	LQSIGTENTEENRR	0.959	14.6	25	9.94	0	1	0	1646.81	44	57
Fructose-bisphosphate aldolase A GN=ALDOA	ALDOA_HUMAN	39.4206	1	4	4	6	8.24e-05	0.148	AAQEEYVKR	0.997	46.3	25	38.8	1	0	0	1093.56	323	331
Fructose-bisphosphate aldolase A GN=ALDOA	ALDOA_HUMAN	39.4206	1	4	4	6	8.24e-05	0.148	ALANSLACQGK	0.997	40.2	25	36	2	0	0	1132.58	332	342
Dolichyl-phosphate beta-glucosyltransferase GN=ALG5	ALG5_HUMAN	36.9475	1	4	5	9	0.000124	0.127	QLSVVVPSYNEEK	0.996	29.3	25	29.1	2	0	0	1491.77	66	78
Dolichyl-phosphate beta-glucosyltransferase GN=ALG5	ALG5_HUMAN	36.9475	1	4	5	9	0.000124	0.127	YGSDKVR	0.997	46.4	25	32.7	2	0	0	824.426	127	133
Dolichyl-phosphate beta-glucosyltransferase GN=ALG5	ALG5_HUMAN	36.9475	1	4	5	9	0.000124	0.127	MGIFSSRGEK	0.972	21.2	25	12.3	1	0	0	1111.56	149	158
Dolichyl-phosphate beta-glucosyltransferase GN=ALG5	ALG5_HUMAN	36.9475	1	4	5	9	0.000124	0.127	AHLEKESIAQR	0.997	38.5	25	28.4	2	2	0	1281.69	198	208
Ankyrin repeat and FYVE domain-containing protein 1 GN=ANKFY1	ANFY1_HUMAN	128.402	0.998	2	3	5	6.87e-05	0.0282	GSHTDAPDTATGNCLLQR	0.997	38.5	25	38.5	1	2	0	1913.88	447	464
Ankyrin repeat and FYVE domain-containing protein 1 GN=ANKFY1	ANFY1_HUMAN	128.402	0.998	2	3	5	6.87e-05	0.0282	AIDENNEPTACFLIR	0.997	50.5	25	50.5	2	0	0	1762.84	732	746
Protein arginine N-methyltransferase 1 GN=PRMT1	ANM1_HUMAN	41.5161	1	5	7	10	0.000137	0.136	KVIGIECSSISDYAVK	0.985	25.2	25	21.7	1	1	0	1768.92	103	118
Protein arginine N-methyltransferase 1 GN=PRMT1	ANM1_HUMAN	41.5161	1	5	7	10	0.000137	0.136	VIGIECSSISDYAVK	0.99	26.8	25	26.8	1	0	0	1640.82	104	118
Protein arginine N-methyltransferase 1 GN=PRMT1	ANM1_HUMAN	41.5161	1	5	7	10	0.000137	0.136	ANKLDHVVTIIK	0.996	20.6	25	9.67	1	2	0	1350.81	122	133
Protein arginine N-methyltransferase 1 GN=PRMT1	ANM1_HUMAN	41.5161	1	5	7	10	0.000137	0.136	ATLYVTAIEDR	0.997	73.8	25	72.7	2	0	0	1251.66	186	196
Protein arginine N-methyltransferase 1 GN=PRMT1	ANM1_HUMAN	41.5161	1	5	7	10	0.000137	0.136	QLVTNACLIK	0.997	36.9	25	24	2	0	0	1159.65	234	243
Protein arginine N-methyltransferase 3 GN=PRMT3	ANM3_HUMAN	59.8772	0.998	2	2	2	2.75e-05	0.0452	ALSAEAALAR	0.997	49	25	34.1	1	0	0	972.547	169	178
Protein arginine N-methyltransferase 3 GN=PRMT3	ANM3_HUMAN	59.8772	0.998	2	2	2	2.75e-05	0.0452	AVIPEAVVEVLDPK	0.992	30.1	25	29.9	1	0	0	1478.85	397	410
Protein arginine N-methyltransferase 5 GN=PRMT5	ANM5_HUMAN	72.6851	1	33	49	311	0.00427	0.427	VSSGRDLNCVPEIADTLGAVAK	0.997	72.6	25	69.8	5	15	0	2272.16	14	35
Protein arginine N-methyltransferase 5 GN=PRMT5	ANM5_HUMAN	72.6851	1	33	49	311	0.00427	0.427	DLNCVPEIADTLGAVAK	0.997	58.1	25	55.8	18	2	0	1785.91	19	35
Protein arginine N-methyltransferase 5 GN=PRMT5	ANM5_HUMAN	72.6851	1	33	49	311	0.00427	0.427	QGFDFLCMPVFHPR	0.997	60.3	25	60.3	5	20	0	1750.82	36	49
Protein arginine N-methyltransferase 5 GN=PRMT5	ANM5_HUMAN	72.6851	1	33	49	311	0.00427	0.427	REFIQEPAK	0.997	36.9	25	17	4	0	0	1117.6	52	60
Protein arginine N-methyltransferase 5 GN=PRMT5	ANM5_HUMAN	72.6851	1	33	49	311	0.00427	0.427	EFIQEPAK	0.997	40.7	25	23.4	14	0	0	961.499	53	60
Protein arginine N-methyltransferase 5 GN=PRMT5	ANM5_HUMAN	72.6851	1	33	49	311	0.00427	0.427	EFIQEPAKNRPGPQTR	0.997	25.7	25	18.8	4	14	0	1867.98	53	68
Protein arginine N-methyltransferase 5 GN=PRMT5	ANM5_HUMAN	72.6851	1	33	49	311	0.00427	0.427	NRPGPQTR	0.994	30.2	25	17.5	1	0	0	925.496	61	68
Protein arginine N-methyltransferase 5 GN=PRMT5	ANM5_HUMAN	72.6851	1	33	49	311	0.00427	0.427	SDLLLSGR	0.997	40.2	25	15.9	2	0	0	860.484	69	76
Protein arginine N-methyltransferase 5 GN=PRMT5	ANM5_HUMAN	72.6851	1	33	49	311	0.00427	0.427	SDLLLSGRDWNTLIVGK	0.997	72.1	25	72.1	7	12	0	1887.03	69	85
Protein arginine N-methyltransferase 5 GN=PRMT5	ANM5_HUMAN	72.6851	1	33	49	311	0.00427	0.427	LSPWIRPDSKVEK	0.996	29.5	25	29.5	2	0	0	1554.86	86	98
Protein arginine N-methyltransferase 5 GN=PRMT5	ANM5_HUMAN	72.6851	1	33	49	311	0.00427	0.427	VPLVAPEDLR	0.997	31.9	25	30.1	2	0	0	1108.64	155	164
Protein arginine N-methyltransferase 5 GN=PRMT5	ANM5_HUMAN	72.6851	1	33	49	311	0.00427	0.427	TLCDYSK	0.983	28.4	25	27.2	2	0	0	886.398	194	200
Protein arginine N-methyltransferase 5 GN=PRMT5	ANM5_HUMAN	72.6851	1	33	49	311	0.00427	0.427	TLCDYSKR	0.997	54.8	25	36.2	15	0	0	1042.5	194	201
Protein arginine N-methyltransferase 5 GN=PRMT5	ANM5_HUMAN	72.6851	1	33	49	311	0.00427	0.427	IAVALEIGADLPSNHVIDR	0.997	95	25	95	4	9	0	2003.09	202	220
Protein arginine N-methyltransferase 5 GN=PRMT5	ANM5_HUMAN	72.6851	1	33	49	311	0.00427	0.427	WLGEPIK	0.995	29.9	25	21.1	2	0	0	842.477	221	227
Protein arginine N-methyltransferase 5 GN=PRMT5	ANM5_HUMAN	72.6851	1	33	49	311	0.00427	0.427	AAILPTSIFLTNK	0.997	75.5	25	75.5	32	0	0	1388.81	228	240
Protein arginine N-methyltransferase 5 GN=PRMT5	ANM5_HUMAN	72.6851	1	33	49	311	0.00427	0.427	AAILPTSIFLTNKK	0.997	60.3	25	60.3	12	11	0	1516.91	228	241
Protein arginine N-methyltransferase 5 GN=PRMT5	ANM5_HUMAN	72.6851	1	33	49	311	0.00427	0.427	KGFPVLSK	0.997	51.3	25	37.6	18	0	0	875.535	241	248
Protein arginine N-methyltransferase 5 GN=PRMT5	ANM5_HUMAN	72.6851	1	33	49	311	0.00427	0.427	DPIKYSQYQQAIYK	0.997	64.6	25	57.9	2	2	0	1744.89	330	343
Protein arginine N-methyltransferase 5 GN=PRMT5	ANM5_HUMAN	72.6851	1	33	49	311	0.00427	0.427	YSQYQQAIYK	0.997	60.1	25	60.1	16	0	0	1291.63	334	343
Protein arginine N-methyltransferase 5 GN=PRMT5	ANM5_HUMAN	72.6851	1	33	49	311	0.00427	0.427	VPEEEKDTNVQVLMVLGAGR	0.997	59	25	59	0	4	0	2184.13	349	368
Protein arginine N-methyltransferase 5 GN=PRMT5	ANM5_HUMAN	72.6851	1	33	49	311	0.00427	0.427	DTNVQVLMVLGAGR	0.997	57	25	47	3	0	0	1472.79	355	368
Protein arginine N-methyltransferase 5 GN=PRMT5	ANM5_HUMAN	72.6851	1	33	49	311	0.00427	0.427	GPLVNASLR	0.997	56.1	25	48.2	6	0	0	926.542	369	377
Protein arginine N-methyltransferase 5 GN=PRMT5	ANM5_HUMAN	72.6851	1	33	49	311	0.00427	0.427	GPLVNASLRAAK	0.997	60.4	25	49.7	2	0	0	1196.71	369	380
Protein arginine N-methyltransferase 5 GN=PRMT5	ANM5_HUMAN	72.6851	1	33	49	311	0.00427	0.427	IKLYAVEK	0.997	37	25	25.4	7	0	0	963.587	386	393
Protein arginine N-methyltransferase 5 GN=PRMT5	ANM5_HUMAN	72.6851	1	33	49	311	0.00427	0.427	DDGVSIPGEYTSFLAPISSSK	0.997	63.8	25	63.8	2	0	0	2170.06	459	479
Protein arginine N-methyltransferase 5 GN=PRMT5	ANM5_HUMAN	72.6851	1	33	49	311	0.00427	0.427	LYNEVRACR	0.987	23.6	25	17.2	1	0	0	1180.59	480	488
Protein arginine N-methyltransferase 5 GN=PRMT5	ANM5_HUMAN	72.6851	1	33	49	311	0.00427	0.427	DRDPEAQFEMPYVVR	0.997	49.4	25	42.3	5	7	0	1851.87	491	505
Protein arginine N-methyltransferase 5 GN=PRMT5	ANM5_HUMAN	72.6851	1	33	49	311	0.00427	0.427	DPEAQFEMPYVVR	0.997	57.1	25	55	2	0	0	1580.74	493	505
Protein arginine N-methyltransferase 5 GN=PRMT5	ANM5_HUMAN	72.6851	1	33	49	311	0.00427	0.427	DPMIDNNR	0.997	45.8	25	41.2	3	0	0	990.431	527	534
Protein arginine N-methyltransferase 5 GN=PRMT5	ANM5_HUMAN	72.6851	1	33	49	311	0.00427	0.427	QPITVREGQTICVR	0.997	34.9	25	34.9	0	2	0	1656.89	588	601
Protein arginine N-methyltransferase 5 GN=PRMT5	ANM5_HUMAN	72.6851	1	33	49	311	0.00427	0.427	EGQTICVR	0.997	41.6	25	33.2	13	0	0	962.472	594	601
Protein arginine N-methyltransferase 5 GN=PRMT5	ANM5_HUMAN	72.6851	1	33	49	311	0.00427	0.427	EGQTICVRFWR	0.997	22.9	25	22.9	0	2	0	1451.72	594	604
Annexin A6 GN=ANXA6	ANXA6_HUMAN	75.8775	0.998	2	2	3	4.12e-05	0.0342	NKPLFFADKLYK	0.964	16.5	25	16.5	0	1	0	1483.83	599	610
Annexin A6 GN=ANXA6	ANXA6_HUMAN	75.8775	0.998	2	2	3	4.12e-05	0.0342	GAGTDEKTLTR	0.997	57.1	25	39.3	2	0	0	1148.59	614	624
AP-1 complex subunit gamma-1 GN=AP1G1	AP1G1_HUMAN	91.3543	1	3	3	5	6.87e-05	0.0268	SSFREEDNTYR	0.962	20.3	25	20.3	1	0	0	1403.62	36	46
AP-1 complex subunit gamma-1 GN=AP1G1	AP1G1_HUMAN	91.3543	1	3	3	5	6.87e-05	0.0268	KAALCAVHVIR	0.992	18.6	25	18.6	0	2	0	1237.72	156	166
AP-1 complex subunit gamma-1 GN=AP1G1	AP1G1_HUMAN	91.3543	1	3	3	5	6.87e-05	0.0268	AALCAVHVIR	0.997	71.4	25	67.8	2	0	0	1109.62	157	166
AP-1 complex subunit mu-1 GN=AP1M1	AP1M1_HUMAN	48.5878	1	7	8	13	0.000179	0.184	VFLSGMPELR	0.991	28.2	25	27.5	1	0	0	1164.61	202	211
AP-1 complex subunit mu-1 GN=AP1M1	AP1M1_HUMAN	48.5878	1	7	8	13	0.000179	0.184	LGLNDKVLFDNTGR	0.997	61	25	55.2	2	1	0	1561.83	212	225
AP-1 complex subunit mu-1 GN=AP1M1	AP1M1_HUMAN	48.5878	1	7	8	13	0.000179	0.184	SVELEDVKFHQCVR	0.997	28.7	25	23.3	0	1	0	1745.86	230	243
AP-1 complex subunit mu-1 GN=AP1M1	AP1M1_HUMAN	48.5878	1	7	8	13	0.000179	0.184	STANNVEIHIPVPNDADSPK	0.997	42.6	25	42.6	0	2	0	2118.05	305	324
AP-1 complex subunit mu-1 GN=AP1M1	AP1M1_HUMAN	48.5878	1	7	8	13	0.000179	0.184	YLKIIEK	0.993	25.9	25	14.8	2	0	0	906.566	394	400
AP-1 complex subunit mu-1 GN=AP1M1	AP1M1_HUMAN	48.5878	1	7	8	13	0.000179	0.184	YITQNGDYQLR	0.995	28.3	25	28.3	2	0	0	1370.67	411	421
AP-1 complex subunit mu-1 GN=AP1M1	AP1M1_HUMAN	48.5878	1	7	8	13	0.000179	0.184	YITQNGDYQLRTQ	0.997	61	25	49.9	2	0	0	1599.78	411	423
AP-2 complex subunit alpha-1 GN=AP2A1	AP2A1_HUMAN	107.549	1	5	5	6	8.24e-05	0.0655	GLAVFISDIRNCK	0.994	30.2	25	30.2	1	0	0	1492.79	12	24
AP-2 complex subunit alpha-1 GN=AP2A1	AP2A1_HUMAN	107.549	1	5	5	6	8.24e-05	0.0655	EMGEAFAADIPR	0.997	38.4	25	38.4	1	0	0	1306.61	142	153
AP-2 complex subunit alpha-1 GN=AP2A1	AP2A1_HUMAN	107.549	1	5	5	6	8.24e-05	0.0655	LVECLETVLNK	0.997	40	25	30.1	1	0	0	1317.71	280	290
AP-2 complex subunit alpha-1 GN=AP2A1	AP2A1_HUMAN	107.549	1	5	5	6	8.24e-05	0.0655	VGGYILGEFGNLIAGDPR	0.997	64.5	25	64.5	2	0	0	1847.97	499	516
AP-2 complex subunit alpha-1 GN=AP2A1	AP2A1_HUMAN	107.549	1	5	5	6	8.24e-05	0.0655	HLCELLAQQF	0.955	21	25	21	1	0	0	1258.62	968	977
AP-2 complex subunit mu GN=AP2M1	AP2M1_HUMAN	49.6557	0.998	2	2	3	4.12e-05	0.0368	LSKFDSER	0.992	29.8	25	16.6	1	0	0	981.5	254	261
AP-2 complex subunit mu GN=AP2M1	AP2M1_HUMAN	49.6557	0.998	2	2	3	4.12e-05	0.0368	SGIYETRC	0.997	32.8	25	32.8	2	0	0	985.441	428	435
AP-3 complex subunit mu-1 GN=AP3M1	AP3M1_HUMAN	46.94	1	4	4	5	6.87e-05	0.124	SVVSQSVCDYFFEAQEK	0.997	39.4	25	39.4	1	0	0	2022.91	22	38
AP-3 complex subunit mu-1 GN=AP3M1	AP3M1_HUMAN	46.94	1	4	4	5	6.87e-05	0.124	ELIKPPTILR	0.971	20.7	25	20.7	1	0	0	1179.75	132	141
AP-3 complex subunit mu-1 GN=AP3M1	AP3M1_HUMAN	46.94	1	4	4	5	6.87e-05	0.124	LLDDVSFHPCIR	0.988	19.6	25	16.1	0	1	0	1471.74	227	238
AP-3 complex subunit mu-1 GN=AP3M1	AP3M1_HUMAN	46.94	1	4	4	5	6.87e-05	0.124	TIEGITVTVHMPK	0.997	38.2	25	38.2	2	0	0	1425.78	304	316
Anaphase-promoting complex subunit 1 GN=ANAPC1	APC1_HUMAN	216.503	1	7	7	11	0.000151	0.0448	FSEQGGTPQNVATSSSLTAHLR	0.997	34.8	25	33.4	0	1	0	2288.13	285	306
Anaphase-promoting complex subunit 1 GN=ANAPC1	APC1_HUMAN	216.503	1	7	7	11	0.000151	0.0448	STSSPSLHSR	0.997	37.3	25	28.7	2	0	0	1058.52	331	340
Anaphase-promoting complex subunit 1 GN=ANAPC1	APC1_HUMAN	216.503	1	7	7	11	0.000151	0.0448	SPSISNMAALSR	0.997	74.6	25	67.2	2	0	0	1233.63	341	352
Anaphase-promoting complex subunit 1 GN=ANAPC1	APC1_HUMAN	216.503	1	7	7	11	0.000151	0.0448	NFDFEGSLSPVIAPK	0.997	47.1	25	47.1	2	0	0	1620.83	680	694
Anaphase-promoting complex subunit 1 GN=ANAPC1	APC1_HUMAN	216.503	1	7	7	11	0.000151	0.0448	LLQSAHPVR	0.959	20.7	25	20.7	1	0	0	1020.59	1040	1048
Anaphase-promoting complex subunit 1 GN=ANAPC1	APC1_HUMAN	216.503	1	7	7	11	0.000151	0.0448	HLYVLAAEPR	0.997	33.8	25	33.8	1	0	0	1168.65	1608	1617
Anaphase-promoting complex subunit 1 GN=ANAPC1	APC1_HUMAN	216.503	1	7	7	11	0.000151	0.0448	LVLEFFSSR	0.997	34.6	25	29	2	0	0	1097.6	1816	1824
Anaphase-promoting complex subunit 7 GN=ANAPC7	APC7_HUMAN	66.8578	1	3	3	5	6.87e-05	0.0651	GMDVYGYLLAR	0.997	51.2	25	45.4	2	0	0	1257.63	307	317
Anaphase-promoting complex subunit 7 GN=ANAPC7	APC7_HUMAN	66.8578	1	3	3	5	6.87e-05	0.0651	AIQLNSNSVQALLLK	0.997	65.3	25	59.7	2	0	0	1611.94	365	379
Anaphase-promoting complex subunit 7 GN=ANAPC7	APC7_HUMAN	66.8578	1	3	3	5	6.87e-05	0.0651	NALANQSDCVLHR	0.997	44.3	25	37.3	1	0	0	1497.72	501	513
Adenine phosphoribosyltransferase GN=APRT	APT_HUMAN	19.6085	1	4	4	7	9.62e-05	0.233	SFPDFPTPGVVFR	0.997	38.4	25	30.7	2	0	0	1465.75	15	27
Adenine phosphoribosyltransferase GN=APRT	APT_HUMAN	19.6085	1	4	4	7	9.62e-05	0.233	DISPVLKDPASFR	0.997	41.4	25	39.5	2	0	0	1444.78	28	40
Adenine phosphoribosyltransferase GN=APRT	APT_HUMAN	19.6085	1	4	4	7	9.62e-05	0.233	ATHGGRIDYIAGLDSR	0.95	14.1	25	14.1	0	1	0	1701.87	52	67
Adenine phosphoribosyltransferase GN=APRT	APT_HUMAN	19.6085	1	4	4	7	9.62e-05	0.233	IDYIAGLDSR	0.997	65.6	25	61.3	2	0	0	1122.58	58	67
Actin-related protein 2 GN=ACTR2	ARP2_HUMAN	44.7617	1	4	4	5	6.87e-05	0.124	KVVVCDNGTGFVK	0.972	22.9	25	22.9	1	0	0	1422.74	7	19
Actin-related protein 2 GN=ACTR2	ARP2_HUMAN	44.7617	1	4	4	5	6.87e-05	0.124	ILLTEPPMNPTK	0.957	21.2	25	18	1	0	0	1353.74	107	118
Actin-related protein 2 GN=ACTR2	ARP2_HUMAN	44.7617	1	4	4	5	6.87e-05	0.124	GYAFNHSADFETVR	0.997	35.2	25	30.3	1	0	0	1613.73	201	214
Actin-related protein 2 GN=ACTR2	ARP2_HUMAN	44.7617	1	4	4	5	6.87e-05	0.124	VLEKLGVTVR	0.997	54.4	25	47.9	2	0	0	1113.7	385	394
Activating signal cointegrator 1 complex subunit 3 GN=ASCC3	ASCC3_HUMAN	251.467	1	3	3	9	0.000124	0.0141	RLEPLGIIVK	0.978	21.7	25	16	2	0	0	1137.74	553	562
Activating signal cointegrator 1 complex subunit 3 GN=ASCC3	ASCC3_HUMAN	251.467	1	3	3	9	0.000124	0.0141	TVAAELAIFR	0.997	60.5	25	60.5	6	0	0	1090.63	1356	1365
Activating signal cointegrator 1 complex subunit 3 GN=ASCC3	ASCC3_HUMAN	251.467	1	3	3	9	0.000124	0.0141	VSDSLTDLALK	0.995	29	25	20.6	1	0	0	1161.64	2192	2202
Asparagine synthetase [glutamine-hydrolyzing] GN=ASNS	ASNS_HUMAN	64.3717	1	5	6	8	0.00011	0.107	LAVVDPLFGMQPIR	0.997	47	25	45.6	4	0	0	1571.86	50	63
Asparagine synthetase [glutamine-hydrolyzing] GN=ASNS	ASNS_HUMAN	64.3717	1	5	6	8	0.00011	0.107	DTYGVRPLFK	0.992	25.3	25	20.9	1	0	0	1195.65	138	147
Asparagine synthetase [glutamine-hydrolyzing] GN=ASNS	ASNS_HUMAN	64.3717	1	5	6	8	0.00011	0.107	AMTEDGFLAVCSEAK	0.997	46.8	25	46.8	1	0	0	1628.73	148	162
Asparagine synthetase [glutamine-hydrolyzing] GN=ASNS	ASNS_HUMAN	64.3717	1	5	6	8	0.00011	0.107	EAFSDGITSVK	0.99	28	25	22.6	1	0	0	1153.57	468	478
Asparagine synthetase [glutamine-hydrolyzing] GN=ASNS	ASNS_HUMAN	64.3717	1	5	6	8	0.00011	0.107	WINATDPSAR	0.953	19.6	25	16.5	1	0	0	1130.56	541	550
Probable cation-transporting ATPase 13A1 GN=ATP13A1	AT131_HUMAN	132.958	1	2	2	5	6.87e-05	0.0208	SIDGSIVLPLAR	0.996	28.3	25	28.2	2	0	0	1240.73	786	797
Probable cation-transporting ATPase 13A1 GN=ATP13A1	AT131_HUMAN	132.958	1	2	2	5	6.87e-05	0.0208	LGDASIAAPFTSK	0.987	29.2	25	29.2	3	0	0	1277.67	951	963
Sodium/potassium-transporting ATPase subunit alpha-1 GN=ATP1A1	AT1A1_HUMAN	112.9	1	9	9	12	0.000165	0.0948	YGTDLSR	0.989	24.7	25	16.3	1	0	0	811.394	55	61
Sodium/potassium-transporting ATPase subunit alpha-1 GN=ATP1A1	AT1A1_HUMAN	112.9	1	9	9	12	0.000165	0.0948	SPDFTNENPLETR	0.997	31.1	25	31.1	2	0	0	1519.7	228	240
Sodium/potassium-transporting ATPase subunit alpha-1 GN=ATP1A1	AT1A1_HUMAN	112.9	1	9	9	12	0.000165	0.0948	IAGLCNR	0.994	28.2	25.6	16.6	1	0	0	803.419	424	430
Sodium/potassium-transporting ATPase subunit alpha-1 GN=ATP1A1	AT1A1_HUMAN	112.9	1	9	9	12	0.000165	0.0948	AVFQANQENLPILK	0.997	38.7	25	38.4	1	0	0	1584.87	431	444
Sodium/potassium-transporting ATPase subunit alpha-1 GN=ATP1A1	AT1A1_HUMAN	112.9	1	9	9	12	0.000165	0.0948	AVFQANQENLPILKR	0.988	35.7	25	34.3	1	0	0	1740.98	431	445
Sodium/potassium-transporting ATPase subunit alpha-1 GN=ATP1A1	AT1A1_HUMAN	112.9	1	9	9	12	0.000165	0.0948	AAVPDAVGKCR	0.968	20.8	25	18.5	2	0	0	1143.59	597	607
Sodium/potassium-transporting ATPase subunit alpha-1 GN=ATP1A1	AT1A1_HUMAN	112.9	1	9	9	12	0.000165	0.0948	SAGIKVIMVTGDHPITAK	0.951	16.4	25	16.4	0	1	0	1854.02	608	625
Sodium/potassium-transporting ATPase subunit alpha-1 GN=ATP1A1	AT1A1_HUMAN	112.9	1	9	9	12	0.000165	0.0948	LNIPVSQVNPR	0.997	47	25	47	2	0	0	1236.71	648	658
Sodium/potassium-transporting ATPase subunit alpha-1 GN=ATP1A1	AT1A1_HUMAN	112.9	1	9	9	12	0.000165	0.0948	TSPQQKLIIVEGCQR	0.98	20.1	25	20.1	0	1	0	1756.94	693	707
Sarcoplasmic/endoplasmic reticulum calcium ATPase 2 GN=ATP2A2	AT2A2_HUMAN	114.759	1	7	7	20	0.000275	0.0893	NMLFSGTNIAAGK	0.997	33.4	25	33.4	3	0	0	1323.67	206	218
Sarcoplasmic/endoplasmic reticulum calcium ATPase 2 GN=ATP2A2	AT2A2_HUMAN	114.759	1	7	7	20	0.000275	0.0893	VGEATETALTCLVEK	0.997	64.1	25	61.1	5	0	0	1620.82	437	451
Sarcoplasmic/endoplasmic reticulum calcium ATPase 2 GN=ATP2A2	AT2A2_HUMAN	114.759	1	7	7	20	0.000275	0.0893	EFTLEFSR	0.994	28.9	25	20.9	2	0	0	1028.5	482	489
Sarcoplasmic/endoplasmic reticulum calcium ATPase 2 GN=ATP2A2	AT2A2_HUMAN	114.759	1	7	7	20	0.000275	0.0893	SMSVYCTPNKPSR	0.997	36.3	25	36.3	3	0	0	1526.71	493	505
Sarcoplasmic/endoplasmic reticulum calcium ATPase 2 GN=ATP2A2	AT2A2_HUMAN	114.759	1	7	7	20	0.000275	0.0893	IGIFGQDEDVTSK	0.997	56	25	52.8	3	0	0	1408.7	638	650
Sarcoplasmic/endoplasmic reticulum calcium ATPase 2 GN=ATP2A2	AT2A2_HUMAN	114.759	1	7	7	20	0.000275	0.0893	AFTGREFDELNPSAQR	0.977	16.1	25	16.1	0	1	0	1837.88	651	666
Sarcoplasmic/endoplasmic reticulum calcium ATPase 2 GN=ATP2A2	AT2A2_HUMAN	114.759	1	7	7	20	0.000275	0.0893	NYLEPGKECVQPATK	0.997	45.6	25	29.8	3	0	0	1733.85	989	1003
Plasma membrane calcium-transporting ATPase 1 GN=ATP2B1	AT2B1_HUMAN	138.759	1	3	3	3	4.12e-05	0.0326	SSPTDKHTLVK	0.977	25.5	25	20.1	1	0	0	1212.66	768	778
Plasma membrane calcium-transporting ATPase 1 GN=ATP2B1	AT2B1_HUMAN	138.759	1	3	3	3	4.12e-05	0.0326	EASDIILTDDNFTSIVK	0.985	27.5	25	27.5	1	0	0	1880.95	824	840
Plasma membrane calcium-transporting ATPase 1 GN=ATP2B1	AT2B1_HUMAN	138.759	1	3	3	3	4.12e-05	0.0326	SSLYEGLEKPESR	0.997	43.2	25	38.7	1	0	0	1494.74	1164	1176
ATPase family AAA domain-containing protein 3A GN=ATAD3A	ATD3A_HUMAN	71.3702	1	25	27	59	0.00081	0.356	TLSEETRQHQAR	0.997	35.8	25	27.3	2	3	0	1455.73	166	177
ATPase family AAA domain-containing protein 3A GN=ATAD3A	ATD3A_HUMAN	71.3702	1	25	27	59	0.00081	0.356	AQYQDKLAR	0.997	50.3	25	41.9	4	0	0	1092.58	178	186
ATPase family AAA domain-containing protein 3A GN=ATAD3A	ATD3A_HUMAN	71.3702	1	25	27	59	0.00081	0.356	ATVEREMELR	0.971	20.7	25	5.13	1	0	0	1233.63	220	229
ATPase family AAA domain-containing protein 3A GN=ATAD3A	ATD3A_HUMAN	71.3702	1	25	27	59	0.00081	0.356	ENADIIREQIR	0.997	29	25	15	2	0	0	1356.72	250	260
ATPase family AAA domain-containing protein 3A GN=ATAD3A	ATD3A_HUMAN	71.3702	1	25	27	59	0.00081	0.356	AAEHRQTVLESIR	0.997	31.5	25	31.5	1	2	0	1509.81	263	275
ATPase family AAA domain-containing protein 3A GN=ATAD3A	ATD3A_HUMAN	71.3702	1	25	27	59	0.00081	0.356	QTVLESIR	0.997	34.2	25	21.7	2	0	0	945.536	268	275
ATPase family AAA domain-containing protein 3A GN=ATAD3A	ATD3A_HUMAN	71.3702	1	25	27	59	0.00081	0.356	TAGTLFGEGFR	0.997	67.7	25	67.7	4	0	0	1155.58	276	286
ATPase family AAA domain-containing protein 3A GN=ATAD3A	ATD3A_HUMAN	71.3702	1	25	27	59	0.00081	0.356	NATLVAGR	0.997	36.4	25	23	2	0	0	801.458	314	321
ATPase family AAA domain-containing protein 3A GN=ATAD3A	ATD3A_HUMAN	71.3702	1	25	27	59	0.00081	0.356	NATLVAGRFIEAR	0.989	24.2	25	23	1	0	0	1417.79	314	326
ATPase family AAA domain-containing protein 3A GN=ATAD3A	ATD3A_HUMAN	71.3702	1	25	27	59	0.00081	0.356	LGKPSLVR	0.997	36.6	25	24.9	4	0	0	869.557	327	334
ATPase family AAA domain-containing protein 3A GN=ATAD3A	ATD3A_HUMAN	71.3702	1	25	27	59	0.00081	0.356	ITVLEALR	0.997	43.5	25	21.3	3	0	0	914.567	339	346
ATPase family AAA domain-containing protein 3A GN=ATAD3A	ATD3A_HUMAN	71.3702	1	25	27	59	0.00081	0.356	ITVLEALRHPIQVSR	0.997	41.6	25	41.6	0	4	0	1732.02	339	353
ATPase family AAA domain-containing protein 3A GN=ATAD3A	ATD3A_HUMAN	71.3702	1	25	27	59	0.00081	0.356	HPIQVSR	0.996	29.9	25	12.8	1	0	0	836.474	347	353
ATPase family AAA domain-containing protein 3A GN=ATAD3A	ATD3A_HUMAN	71.3702	1	25	27	59	0.00081	0.356	LLSRPQDALEGVVLSPSLEAR	0.997	46.5	25	44.4	0	2	0	2250.25	355	375
ATPase family AAA domain-containing protein 3A GN=ATAD3A	ATD3A_HUMAN	71.3702	1	25	27	59	0.00081	0.356	VRDIAIATR	0.997	42.1	25	35.5	4	0	0	1014.61	376	384
ATPase family AAA domain-containing protein 3A GN=ATAD3A	ATD3A_HUMAN	71.3702	1	25	27	59	0.00081	0.356	NILMYGPPGTGK	0.997	49.8	25	42.2	2	0	0	1263.64	395	406
ATPase family AAA domain-containing protein 3A GN=ATAD3A	ATD3A_HUMAN	71.3702	1	25	27	59	0.00081	0.356	EGVTAMHK	0.997	32.3	25	20.2	2	0	0	872.429	435	442
ATPase family AAA domain-containing protein 3A GN=ATAD3A	ATD3A_HUMAN	71.3702	1	25	27	59	0.00081	0.356	LFDWANTSR	0.991	26.1	25	19.2	1	0	0	1109.54	443	451
ATPase family AAA domain-containing protein 3A GN=ATAD3A	ATD3A_HUMAN	71.3702	1	25	27	59	0.00081	0.356	ISEDLRATLNAFLYR	0.997	37.7	25	37.7	0	1	0	1781.95	473	487
ATPase family AAA domain-containing protein 3A GN=ATAD3A	ATD3A_HUMAN	71.3702	1	25	27	59	0.00081	0.356	MYFDKYVLKPATEGK	0.997	22.4	25	22.4	0	1	0	1789.92	535	549
ATPase family AAA domain-containing protein 3A GN=ATAD3A	ATD3A_HUMAN	71.3702	1	25	27	59	0.00081	0.356	LKLAQFDYGR	0.997	48.1	25	48.1	2	0	0	1210.66	552	561
ATPase family AAA domain-containing protein 3A GN=ATAD3A	ATD3A_HUMAN	71.3702	1	25	27	59	0.00081	0.356	LAQFDYGR	0.997	37.5	25	16.6	2	0	0	969.479	554	561
ATPase family AAA domain-containing protein 3A GN=ATAD3A	ATD3A_HUMAN	71.3702	1	25	27	59	0.00081	0.356	LAQFDYGRK	0.986	29.2	25	22.6	2	0	0	1097.57	554	562
ATPase family AAA domain-containing protein 3A GN=ATAD3A	ATD3A_HUMAN	71.3702	1	25	27	59	0.00081	0.356	VQDAVQQHQQK	0.997	46.6	25	30.6	2	0	0	1308.67	606	616
ATPase family AAA domain-containing protein 3A GN=ATAD3A	ATD3A_HUMAN	71.3702	1	25	27	59	0.00081	0.356	AEGPGRGDEPSPS	0.997	51.5	25	50.7	2	0	0	1255.56	622	634
ATPase family AAA domain-containing protein 3B GN=ATAD3B	ATD3B_HUMAN	72.574	1	3	3	4	5.49e-05	0.256	TLSEETRQHQAR	0.997	35.8	25	27.3	2	3	0	1455.73	118	129
ATPase family AAA domain-containing protein 3B GN=ATAD3B	ATD3B_HUMAN	72.574	1	3	3	4	5.49e-05	0.256	AQYQDKLAR	0.997	50.3	25	41.9	4	0	0	1092.58	130	138
ATPase family AAA domain-containing protein 3B GN=ATAD3B	ATD3B_HUMAN	72.574	1	3	3	4	5.49e-05	0.256	ATVEREMELR	0.971	20.7	25	5.13	1	0	0	1233.63	172	181
ATPase family AAA domain-containing protein 3B GN=ATAD3B	ATD3B_HUMAN	72.574	1	3	3	4	5.49e-05	0.256	ENADIIREQIR	0.997	29	25	15	2	0	0	1356.72	202	212
ATPase family AAA domain-containing protein 3B GN=ATAD3B	ATD3B_HUMAN	72.574	1	3	3	4	5.49e-05	0.256	QTVLESIR	0.997	34.2	25	21.7	2	0	0	945.536	220	227
ATPase family AAA domain-containing protein 3B GN=ATAD3B	ATD3B_HUMAN	72.574	1	3	3	4	5.49e-05	0.256	TAGTLFGEGFR	0.997	67.7	25	67.7	4	0	0	1155.58	228	238
ATPase family AAA domain-containing protein 3B GN=ATAD3B	ATD3B_HUMAN	72.574	1	3	3	4	5.49e-05	0.256	LGKPSLVR	0.997	36.6	25	24.9	4	0	0	869.557	279	286
ATPase family AAA domain-containing protein 3B GN=ATAD3B	ATD3B_HUMAN	72.574	1	3	3	4	5.49e-05	0.256	ITVLEALR	0.997	43.5	25	21.3	3	0	0	914.567	291	298
ATPase family AAA domain-containing protein 3B GN=ATAD3B	ATD3B_HUMAN	72.574	1	3	3	4	5.49e-05	0.256	ITVLEALRHPIQVSR	0.997	41.6	25	41.6	0	4	0	1732.02	291	305
ATPase family AAA domain-containing protein 3B GN=ATAD3B	ATD3B_HUMAN	72.574	1	3	3	4	5.49e-05	0.256	HPIQVSR	0.996	29.9	25	12.8	1	0	0	836.474	299	305
ATPase family AAA domain-containing protein 3B GN=ATAD3B	ATD3B_HUMAN	72.574	1	3	3	4	5.49e-05	0.256	LLSRPQDVLEGVVLSPSLEAR	0.994	19.5	25	19.5	0	1	0	2278.28	307	327
ATPase family AAA domain-containing protein 3B GN=ATAD3B	ATD3B_HUMAN	72.574	1	3	3	4	5.49e-05	0.256	VRDIAIATR	0.997	42.1	25	35.5	4	0	0	1014.61	328	336
ATPase family AAA domain-containing protein 3B GN=ATAD3B	ATD3B_HUMAN	72.574	1	3	3	4	5.49e-05	0.256	EGVTAMHK	0.997	32.3	25	20.2	2	0	0	872.429	387	394
ATPase family AAA domain-containing protein 3B GN=ATAD3B	ATD3B_HUMAN	72.574	1	3	3	4	5.49e-05	0.256	LFDWANTSR	0.991	26.1	25	19.2	1	0	0	1109.54	395	403
ATPase family AAA domain-containing protein 3B GN=ATAD3B	ATD3B_HUMAN	72.574	1	3	3	4	5.49e-05	0.256	GLLLFMDEADAFLR	0.997	46.2	25	46.2	1	0	0	1626.82	405	418
ATPase family AAA domain-containing protein 3B GN=ATAD3B	ATD3B_HUMAN	72.574	1	3	3	4	5.49e-05	0.256	ATEEISKDLR	0.997	49.5	25	18.1	2	0	0	1161.61	421	430
ATPase family AAA domain-containing protein 3B GN=ATAD3B	ATD3B_HUMAN	72.574	1	3	3	4	5.49e-05	0.256	LKLAQFDYGR	0.997	48.1	25	48.1	2	0	0	1210.66	504	513
ATPase family AAA domain-containing protein 3B GN=ATAD3B	ATD3B_HUMAN	72.574	1	3	3	4	5.49e-05	0.256	LAQFDYGR	0.997	37.5	25	16.6	2	0	0	969.479	506	513
ATPase family AAA domain-containing protein 3B GN=ATAD3B	ATD3B_HUMAN	72.574	1	3	3	4	5.49e-05	0.256	LAQFDYGRK	0.986	29.2	25	22.6	2	0	0	1097.57	506	514
ATP synthase subunit alpha, mitochondrial GN=ATP5A1	ATPA_HUMAN	59.7521	1	18	24	108	0.00148	0.322	VLSIGDGIAR	0.997	40.8	25	23.2	1	0	0	1000.58	74	83
ATP synthase subunit alpha, mitochondrial GN=ATP5A1	ATPA_HUMAN	59.7521	1	18	24	108	0.00148	0.322	TGAIVDVPVGEELLGR	0.997	74.4	25	73.8	9	0	0	1624.89	134	149
ATP synthase subunit alpha, mitochondrial GN=ATP5A1	ATPA_HUMAN	59.7521	1	18	24	108	0.00148	0.322	VVDALGNAIDGKGPIGSK	0.997	43.1	25	39.8	4	6	0	1710.94	150	167
ATP synthase subunit alpha, mitochondrial GN=ATP5A1	ATPA_HUMAN	59.7521	1	18	24	108	0.00148	0.322	VGLKAPGIIPR	0.997	46.1	25	46.1	4	0	0	1120.72	172	182
ATP synthase subunit alpha, mitochondrial GN=ATP5A1	ATPA_HUMAN	59.7521	1	18	24	108	0.00148	0.322	ISVREPMQTGIK	0.997	48.2	25	37.6	3	2	0	1358.75	183	194
ATP synthase subunit alpha, mitochondrial GN=ATP5A1	ATPA_HUMAN	59.7521	1	18	24	108	0.00148	0.322	AVDSLVPIGR	0.997	59.4	25	59.4	13	0	0	1026.59	195	204
ATP synthase subunit alpha, mitochondrial GN=ATP5A1	ATPA_HUMAN	59.7521	1	18	24	108	0.00148	0.322	AVDSLVPIGRGQR	0.997	34.9	25	32.6	1	3	0	1367.78	195	207
ATP synthase subunit alpha, mitochondrial GN=ATP5A1	ATPA_HUMAN	59.7521	1	18	24	108	0.00148	0.322	ELIIGDRQTGK	0.997	47.5	25	34.3	5	0	0	1229.69	208	218
ATP synthase subunit alpha, mitochondrial GN=ATP5A1	ATPA_HUMAN	59.7521	1	18	24	108	0.00148	0.322	TSIAIDTIINQK	0.997	69.5	25	55.4	6	0	0	1316.74	219	230
ATP synthase subunit alpha, mitochondrial GN=ATP5A1	ATPA_HUMAN	59.7521	1	18	24	108	0.00148	0.322	TSIAIDTIINQKR	0.997	74.1	25	71.6	10	3	0	1472.84	219	231
ATP synthase subunit alpha, mitochondrial GN=ATP5A1	ATPA_HUMAN	59.7521	1	18	24	108	0.00148	0.322	STVAQLVK	0.997	56.5	25	30.1	2	0	0	845.509	254	261
ATP synthase subunit alpha, mitochondrial GN=ATP5A1	ATPA_HUMAN	59.7521	1	18	24	108	0.00148	0.322	STVAQLVKR	0.997	61.6	25	49.9	11	0	0	1001.61	254	262
ATP synthase subunit alpha, mitochondrial GN=ATP5A1	ATPA_HUMAN	59.7521	1	18	24	108	0.00148	0.322	HALIIYDDLSK	0.997	51	25	42.3	8	0	0	1287.69	306	316
ATP synthase subunit alpha, mitochondrial GN=ATP5A1	ATPA_HUMAN	59.7521	1	18	24	108	0.00148	0.322	EAYPGDVFYLHSR	0.997	59.5	25	53.9	8	0	0	1553.74	335	347
ATP synthase subunit alpha, mitochondrial GN=ATP5A1	ATPA_HUMAN	59.7521	1	18	24	108	0.00148	0.322	EAYPGDVFYLHSRLLER	0.997	32	25	30	0	2	0	2065.05	335	351
ATP synthase subunit alpha, mitochondrial GN=ATP5A1	ATPA_HUMAN	59.7521	1	18	24	108	0.00148	0.322	GIRPAINVGLSVSR	0.997	36.9	25	36.9	3	2	0	1438.85	403	416
ATP synthase subunit alpha, mitochondrial GN=ATP5A1	ATPA_HUMAN	59.7521	1	18	24	108	0.00148	0.322	GVRLTELLK	0.985	23.6	25	0	1	0	0	1028.65	464	472
ATP synthase subunit alpha, mitochondrial GN=ATP5A1	ATPA_HUMAN	59.7521	1	18	24	108	0.00148	0.322	LKEIVTNFLAGFEA	0.997	61.2	25	56	1	0	0	1551.84	540	553
ATP synthase subunit beta, mitochondrial GN=ATP5B	ATPB_HUMAN	56.5606	1	13	20	75	0.00103	0.352	LVLEVAQHLGESTVR	0.997	71.1	25	71.1	4	2	0	1650.92	95	109
ATP synthase subunit beta, mitochondrial GN=ATP5B	ATPB_HUMAN	56.5606	1	13	20	75	0.00103	0.352	TIAMDGTEGLVR	0.997	52.9	25	37.1	11	0	0	1262.64	110	121
ATP synthase subunit beta, mitochondrial GN=ATP5B	ATPB_HUMAN	56.5606	1	13	20	75	0.00103	0.352	VLDSGAPIKIPVGPETLGR	0.997	62.5	25	62.5	4	10	0	1919.1	125	143
ATP synthase subunit beta, mitochondrial GN=ATP5B	ATPB_HUMAN	56.5606	1	13	20	75	0.00103	0.352	VVDLLAPYAK	0.997	38.1	25	38.1	3	0	0	1088.64	189	198
ATP synthase subunit beta, mitochondrial GN=ATP5B	ATPB_HUMAN	56.5606	1	13	20	75	0.00103	0.352	IGLFGGAGVGK	0.995	28.8	25	19.7	4	0	0	975.562	202	212
ATP synthase subunit beta, mitochondrial GN=ATP5B	ATPB_HUMAN	56.5606	1	13	20	75	0.00103	0.352	TVLIMELINNVAK	0.997	56.5	25	56.5	3	0	0	1473.83	213	225
ATP synthase subunit beta, mitochondrial GN=ATP5B	ATPB_HUMAN	56.5606	1	13	20	75	0.00103	0.352	AHGGYSVFAGVGER	0.997	58.4	25	58.4	6	5	0	1406.68	226	239
ATP synthase subunit beta, mitochondrial GN=ATP5B	ATPB_HUMAN	56.5606	1	13	20	75	0.00103	0.352	VALVYGQMNEPPGAR	0.997	59	25	47	6	0	0	1601.81	265	279
ATP synthase subunit beta, mitochondrial GN=ATP5B	ATPB_HUMAN	56.5606	1	13	20	75	0.00103	0.352	FTQAGSEVSALLGR	0.997	74.2	25	72.4	2	0	0	1435.75	311	324
ATP synthase subunit beta, mitochondrial GN=ATP5B	ATPB_HUMAN	56.5606	1	13	20	75	0.00103	0.352	AIAELGIYPAVDPLDSTSR	0.997	53	25	51.5	8	0	0	1988.03	388	406
ATP synthase subunit beta, mitochondrial GN=ATP5B	ATPB_HUMAN	56.5606	1	13	20	75	0.00103	0.352	IMDPNIVGSEHYDVAR	0.997	47.5	25	47.5	2	2	0	1815.87	407	422
ATP synthase subunit beta, mitochondrial GN=ATP5B	ATPB_HUMAN	56.5606	1	13	20	75	0.00103	0.352	FLSQPFQVAEVFTGHMGK	0.978	18.8	25	18.8	0	1	0	2023.01	463	480
ATP synthase subunit beta, mitochondrial GN=ATP5B	ATPB_HUMAN	56.5606	1	13	20	75	0.00103	0.352	ADKLAEEHSS	0.997	46.4	25	45.7	2	0	0	1086.51	520	529
ATP synthase subunit gamma, mitochondrial GN=ATP5C1	ATPG_HUMAN	32.998	1	11	17	34	0.000467	0.389	NIQKITK	0.995	30	25	9.78	1	0	0	844.525	40	46
ATP synthase subunit gamma, mitochondrial GN=ATP5C1	ATPG_HUMAN	32.998	1	11	17	34	0.000467	0.389	SMKMVAAAK	0.984	24.1	25	6.05	2	0	0	952.495	47	55
ATP synthase subunit gamma, mitochondrial GN=ATP5C1	ATPG_HUMAN	32.998	1	11	17	34	0.000467	0.389	IYGLGSLALYEK	0.997	81.3	25	72.6	4	0	0	1326.73	68	79
ATP synthase subunit gamma, mitochondrial GN=ATP5C1	ATPG_HUMAN	32.998	1	11	17	34	0.000467	0.389	HLLIGVSSDR	0.997	33.7	25	23.6	2	0	0	1096.61	91	100
ATP synthase subunit gamma, mitochondrial GN=ATP5C1	ATPG_HUMAN	32.998	1	11	17	34	0.000467	0.389	GLCGAIHSSIAK	0.997	67.7	25	65.8	2	1	0	1213.64	101	112
ATP synthase subunit gamma, mitochondrial GN=ATP5C1	ATPG_HUMAN	32.998	1	11	17	34	0.000467	0.389	SEVATLTAAGK	0.997	52.5	25	36.3	2	0	0	1047.57	116	126
ATP synthase subunit gamma, mitochondrial GN=ATP5C1	ATPG_HUMAN	32.998	1	11	17	34	0.000467	0.389	EVMLVGIGDKIR	0.997	49	25	39.1	4	0	0	1329.76	127	138
ATP synthase subunit gamma, mitochondrial GN=ATP5C1	ATPG_HUMAN	32.998	1	11	17	34	0.000467	0.389	THSDQFLVAFK	0.997	59.8	25	52.6	2	0	0	1292.66	144	154
ATP synthase subunit gamma, mitochondrial GN=ATP5C1	ATPG_HUMAN	32.998	1	11	17	34	0.000467	0.389	THSDQFLVAFKEVGR	0.997	54.7	25	51.9	2	2	0	1733.9	144	158
ATP synthase subunit gamma, mitochondrial GN=ATP5C1	ATPG_HUMAN	32.998	1	11	17	34	0.000467	0.389	NASEMIDKLTLTFNR	0.997	81.3	25	81.3	4	4	0	1752.89	263	277
ATP synthase subunit gamma, mitochondrial GN=ATP5C1	ATPG_HUMAN	32.998	1	11	17	34	0.000467	0.389	ELIEIISGAAALD	0.992	26.1	25	26.1	2	0	0	1314.72	286	298
ATP synthase subunit O, mitochondrial GN=ATP5O	ATPO_HUMAN	23.2774	1	8	10	19	0.000261	0.366	LVRPPVQVYGIEGR	0.997	33	25	33	2	2	0	1582.91	27	40
ATP synthase subunit O, mitochondrial GN=ATP5O	ATPO_HUMAN	23.2774	1	8	10	19	0.000261	0.366	YATALYSAASK	0.997	72.9	25	64.6	1	0	0	1145.58	41	51
ATP synthase subunit O, mitochondrial GN=ATP5O	ATPO_HUMAN	23.2774	1	8	10	19	0.000261	0.366	VAQILKEPK	0.997	37.8	25	27.2	2	0	0	1025.64	65	73
ATP synthase subunit O, mitochondrial GN=ATP5O	ATPO_HUMAN	23.2774	1	8	10	19	0.000261	0.366	VAASVLNPYVK	0.997	60.5	25	55.5	2	0	0	1160.67	74	84
ATP synthase subunit O, mitochondrial GN=ATP5O	ATPO_HUMAN	23.2774	1	8	10	19	0.000261	0.366	VAASVLNPYVKR	0.997	35	25	30.6	2	0	0	1316.77	74	85
ATP synthase subunit O, mitochondrial GN=ATP5O	ATPO_HUMAN	23.2774	1	8	10	19	0.000261	0.366	SLNDITAKER	0.997	57.2	25	47	2	0	0	1146.61	91	100
ATP synthase subunit O, mitochondrial GN=ATP5O	ATPO_HUMAN	23.2774	1	8	10	19	0.000261	0.366	SFLSQGQVLK	0.997	30.1	25	25.1	2	0	0	1106.62	163	172
ATP synthase subunit O, mitochondrial GN=ATP5O	ATPO_HUMAN	23.2774	1	8	10	19	0.000261	0.366	TDPSILGGMIVR	0.997	38.1	25	31.6	4	0	0	1258.68	177	188
Ataxin-10 GN=ATXN10	ATX10_HUMAN	53.4908	1	5	5	8	0.00011	0.118	ALTALFKEQR	0.997	53.8	25	53.8	2	0	0	1176.67	28	37
Ataxin-10 GN=ATXN10	ATX10_HUMAN	53.4908	1	5	5	8	0.00011	0.118	NRETAPR	0.984	23.6	25	8.83	2	0	0	843.443	38	44
Ataxin-10 GN=ATXN10	ATX10_HUMAN	53.4908	1	5	5	8	0.00011	0.118	NACIECSVNQNSIR	0.997	73.4	25	69.9	2	0	0	1664.75	90	103
Ataxin-10 GN=ATXN10	ATX10_HUMAN	53.4908	1	5	5	8	0.00011	0.118	ITSDEPLTKDDIPVFLR	0.962	19.7	25	19.7	0	1	0	1959.04	254	270
Ataxin-10 GN=ATXN10	ATX10_HUMAN	53.4908	1	5	5	8	0.00011	0.118	LIGNLCYK	0.993	26.3	25	26.3	1	0	0	980.524	377	384
Bromodomain adjacent to zinc finger domain protein 1A GN=BAZ1A	BAZ1A_HUMAN	178.707	1	2	2	2	2.75e-05	0.0186	LSLQESESK	0.997	33.2	25	33.2	1	0	0	1020.52	1397	1405
Bromodomain adjacent to zinc finger domain protein 1A GN=BAZ1A	BAZ1A_HUMAN	178.707	1	2	2	2	2.75e-05	0.0186	LGLHVTPSNVDQVSTPPAAK	0.991	18.7	25	18.7	0	1	0	2031.09	1533	1552
[3-methyl-2-oxobutanoate dehydrogenase [lipoamide]] kinase, mitochondrial GN=BCKDK	BCKD_HUMAN	46.3624	1	4	5	9	0.000124	0.121	TVTSFYNQSAIDAAAEKPSVR	0.997	27.2	25	27.2	0	2	0	2255.13	49	69
[3-methyl-2-oxobutanoate dehydrogenase [lipoamide]] kinase, mitochondrial GN=BCKDK	BCKD_HUMAN	46.3624	1	4	5	9	0.000124	0.121	LTPTMMLYAGR	0.997	49.3	25	42.2	3	0	0	1253.64	70	80
[3-methyl-2-oxobutanoate dehydrogenase [lipoamide]] kinase, mitochondrial GN=BCKDK	BCKD_HUMAN	46.3624	1	4	5	9	0.000124	0.121	SQDGSHLLK	0.997	37.3	25	27.2	2	0	0	984.511	81	89
[3-methyl-2-oxobutanoate dehydrogenase [lipoamide]] kinase, mitochondrial GN=BCKDK	BCKD_HUMAN	46.3624	1	4	5	9	0.000124	0.121	YLQQELPVR	0.997	44.5	25	30.9	2	0	0	1145.63	93	101
Bcl-2-associated transcription factor 1 GN=BCLAF1	BCLF1_HUMAN	106.125	1	24	30	77	0.00106	0.221	KAEGEPQEESPLK	0.997	56.4	25	52.7	1	2	0	1441.72	168	180
Bcl-2-associated transcription factor 1 GN=BCLAF1	BCLF1_HUMAN	106.125	1	24	30	77	0.00106	0.221	TIAPQNAPR	0.997	35.9	25	21.7	6	0	0	967.532	304	312
Bcl-2-associated transcription factor 1 GN=BCLAF1	BCLF1_HUMAN	106.125	1	24	30	77	0.00106	0.221	TIAPQNAPRDESR	0.984	24.2	25	16.9	2	0	0	1454.73	304	316
Bcl-2-associated transcription factor 1 GN=BCLAF1	BCLF1_HUMAN	106.125	1	24	30	77	0.00106	0.221	GRSSFYPDGGDQETAK	0.988	29.4	25	23.1	1	0	0	1714.77	317	332
Bcl-2-associated transcription factor 1 GN=BCLAF1	BCLF1_HUMAN	106.125	1	24	30	77	0.00106	0.221	SSFYPDGGDQETAK	0.997	45	25	29.3	7	0	0	1501.64	319	332
Bcl-2-associated transcription factor 1 GN=BCLAF1	BCLF1_HUMAN	106.125	1	24	30	77	0.00106	0.221	SSFYPDGGDQETAKTGK	0.997	67.5	25	67.5	5	1	0	1787.81	319	335
Bcl-2-associated transcription factor 1 GN=BCLAF1	BCLF1_HUMAN	106.125	1	24	30	77	0.00106	0.221	FTDEESRVFLLDR	0.996	22.9	25	15.8	1	2	0	1626.81	340	352
Bcl-2-associated transcription factor 1 GN=BCLAF1	BCLF1_HUMAN	106.125	1	24	30	77	0.00106	0.221	KSVLADQGK	0.983	23	25	9.81	1	0	0	945.537	413	421
Bcl-2-associated transcription factor 1 GN=BCLAF1	BCLF1_HUMAN	106.125	1	24	30	77	0.00106	0.221	SVLADQGK	0.992	26	25	19	2	0	0	817.442	414	421
Bcl-2-associated transcription factor 1 GN=BCLAF1	BCLF1_HUMAN	106.125	1	24	30	77	0.00106	0.221	SVLADQGKSFATASHR	0.997	86.1	25	86.1	2	6	0	1674.86	414	429
Bcl-2-associated transcription factor 1 GN=BCLAF1	BCLF1_HUMAN	106.125	1	24	30	77	0.00106	0.221	SFATASHR	0.997	29.5	25	21.9	2	0	0	876.432	422	429
Bcl-2-associated transcription factor 1 GN=BCLAF1	BCLF1_HUMAN	106.125	1	24	30	77	0.00106	0.221	NTEEEGLKYK	0.997	56.2	25	36.8	11	0	0	1210.6	430	439
Bcl-2-associated transcription factor 1 GN=BCLAF1	BCLF1_HUMAN	106.125	1	24	30	77	0.00106	0.221	ETQSPEQVKSEK	0.997	43.9	25	40.5	3	0	0	1389.69	493	504
Bcl-2-associated transcription factor 1 GN=BCLAF1	BCLF1_HUMAN	106.125	1	24	30	77	0.00106	0.221	STFREESPLR	0.995	20.3	25	19.1	2	1	0	1221.62	525	534
Bcl-2-associated transcription factor 1 GN=BCLAF1	BCLF1_HUMAN	106.125	1	24	30	77	0.00106	0.221	MIASDSHRPEVK	0.997	32.9	25	31.7	1	2	0	1385.68	537	548
Bcl-2-associated transcription factor 1 GN=BCLAF1	BCLF1_HUMAN	106.125	1	24	30	77	0.00106	0.221	LLASTLVHSVK	0.99	29.3	25	29.3	2	0	0	1167.71	570	580
Bcl-2-associated transcription factor 1 GN=BCLAF1	BCLF1_HUMAN	106.125	1	24	30	77	0.00106	0.221	SIFDHIKLPQASK	0.997	32.1	25	25.5	0	2	0	1483.83	587	599
Bcl-2-associated transcription factor 1 GN=BCLAF1	BCLF1_HUMAN	106.125	1	24	30	77	0.00106	0.221	SAAMTLNER	0.997	34	25	21.7	3	0	0	992.483	623	631
Bcl-2-associated transcription factor 1 GN=BCLAF1	BCLF1_HUMAN	106.125	1	24	30	77	0.00106	0.221	SAAMTLNERFTSYQK	0.993	27.4	25	27.4	1	0	0	1746.85	623	637
Bcl-2-associated transcription factor 1 GN=BCLAF1	BCLF1_HUMAN	106.125	1	24	30	77	0.00106	0.221	RIDISPSTLR	0.997	39.2	25	29.8	2	0	0	1157.66	654	663
Bcl-2-associated transcription factor 1 GN=BCLAF1	BCLF1_HUMAN	106.125	1	24	30	77	0.00106	0.221	IDISPSTLRK	0.963	19.9	25	12.4	2	0	0	1129.66	655	664
Bcl-2-associated transcription factor 1 GN=BCLAF1	BCLF1_HUMAN	106.125	1	24	30	77	0.00106	0.221	DYKEYK	0.994	29.2	25	18.9	1	0	0	845.404	729	734
Bcl-2-associated transcription factor 1 GN=BCLAF1	BCLF1_HUMAN	106.125	1	24	30	77	0.00106	0.221	SSSSSASPSSPSSR	0.997	42.6	25	42.6	2	0	0	1310.58	751	764
Bcl-2-associated transcription factor 1 GN=BCLAF1	BCLF1_HUMAN	106.125	1	24	30	77	0.00106	0.221	RPKEEEWDPEYTPK	0.997	32.6	25	32.6	0	1	0	1803.86	829	842
Beta-galactosidase GN=GLB1	BGAL_HUMAN	76.0777	1	7	7	13	0.000179	0.152	YISGSIHYSR	0.997	52.5	25	52.3	2	0	0	1182.59	50	59
Beta-galactosidase GN=GLB1	BGAL_HUMAN	76.0777	1	7	7	13	0.000179	0.152	TEAVASSLYDILAR	0.997	75.6	25	74.3	2	0	0	1508.8	286	299
Beta-galactosidase GN=GLB1	BGAL_HUMAN	76.0777	1	7	7	13	0.000179	0.152	TVGAALDILCPSGPIK	0.997	80.7	25	80.7	2	0	0	1611.88	384	399
Beta-galactosidase GN=GLB1	BGAL_HUMAN	76.0777	1	7	7	13	0.000179	0.152	SLYPLTFIQVK	0.995	27.3	25	27.3	2	0	0	1308.76	400	410
Beta-galactosidase GN=GLB1	BGAL_HUMAN	76.0777	1	7	7	13	0.000179	0.152	TTLPQDCSNPAPLSSPLNGVHDR	0.997	32.6	25	32.6	0	1	0	2476.19	420	442
Beta-galactosidase GN=GLB1	BGAL_HUMAN	76.0777	1	7	7	13	0.000179	0.152	AYVAVDGIPQGVLER	0.997	41.1	25	41.1	2	0	0	1586.85	443	457
Beta-galactosidase GN=GLB1	BGAL_HUMAN	76.0777	1	7	7	13	0.000179	0.152	AGATLDLLVENMGR	0.997	73.7	25	64.6	2	0	0	1475.75	469	482
Brefeldin A-inhibited guanine nucleotide-exchange protein 1 GN=ARFGEF1	BIG1_HUMAN	208.771	1	2	2	3	4.12e-05	0.0114	TCYNIYLASK	0.997	34.9	25	19.9	2	0	0	1232.6	177	186
Brefeldin A-inhibited guanine nucleotide-exchange protein 1 GN=ARFGEF1	BIG1_HUMAN	208.771	1	2	2	3	4.12e-05	0.0114	SVDIHDSIQPR	0.984	24.8	25	24.8	1	0	0	1266.64	1569	1579
Ribosome biogenesis protein BMS1 homolog GN=BMS1	BMS1_HUMAN	145.812	1	4	4	7	9.62e-05	0.032	AFAVQSAVR	0.997	55.7	25	44.9	2	0	0	948.526	44	52
Ribosome biogenesis protein BMS1 homolog GN=BMS1	BMS1_HUMAN	145.812	1	4	4	7	9.62e-05	0.032	STLIQCLIR	0.991	25.6	25	18.8	2	0	0	1103.62	96	104
Ribosome biogenesis protein BMS1 homolog GN=BMS1	BMS1_HUMAN	145.812	1	4	4	7	9.62e-05	0.032	IAATGVVLDLDK	0.997	31.4	25	31.4	1	0	0	1214.7	1008	1019
Ribosome biogenesis protein BMS1 homolog GN=BMS1	BMS1_HUMAN	145.812	1	4	4	7	9.62e-05	0.032	SSLKGAEGQLQ	0.997	35.8	25	16.9	2	0	0	1117.58	1272	1282
BRCA1-associated ATM activator 1 GN=BRAT1	BRAT1_HUMAN	88.1194	0.998	2	2	2	2.75e-05	0.028	VTQALNVLTTTFGR	0.997	35	25	35	1	0	0	1520.84	214	227
BRCA1-associated ATM activator 1 GN=BRAT1	BRAT1_HUMAN	88.1194	0.998	2	2	2	2.75e-05	0.028	SSCAGLLCR	0.997	34.6	25	18	1	0	0	1023.47	359	367
Lys-63-specific deubiquitinase BRCC36 GN=BRCC3	BRCC3_HUMAN	36.0711	0.998	2	2	4	5.49e-05	0.0728	TVAEKVDAVR	0.997	47.6	25	34.2	2	0	0	1087.61	61	70
Lys-63-specific deubiquitinase BRCC36 GN=BRCC3	BRCC3_HUMAN	36.0711	0.998	2	2	4	5.49e-05	0.0728	VLYTCFQSIQAQK	0.997	77.2	25	70.7	2	0	0	1585.8	168	180
Ribosome biogenesis protein BRX1 homolog GN=BRIX1	BRX1_HUMAN	41.403	1	2	2	2	2.75e-05	0.0397	HLMQDLR	0.996	29	25	5.92	1	0	0	912.472	76	82
Ribosome biogenesis protein BRX1 homolog GN=BRIX1	BRX1_HUMAN	41.403	1	2	2	2	2.75e-05	0.0397	FVLNLIK	0.994	27.6	25	27.5	1	0	0	846.545	236	242
TATA-binding protein-associated factor 172 GN=BTAF1	BTAF1_HUMAN	206.89	1	3	3	6	8.24e-05	0.0189	LFILLDTGTTPVTR	0.997	62.5	25	62.5	2	0	0	1546.88	9	22
TATA-binding protein-associated factor 172 GN=BTAF1	BTAF1_HUMAN	206.89	1	3	3	6	8.24e-05	0.0189	IAAGQAVEAIVK	0.997	67.6	25	66.7	2	0	0	1169.69	60	71
TATA-binding protein-associated factor 172 GN=BTAF1	BTAF1_HUMAN	206.89	1	3	3	6	8.24e-05	0.0189	AVTLAVQPR	0.995	31.6	25	21.3	2	0	0	954.573	745	753
Mitotic checkpoint protein BUB3 GN=BUB3	BUB3_HUMAN	37.1547	1	3	3	5	6.87e-05	0.101	ESSLKYQTR	0.972	23.8	25	21.1	2	0	0	1111.57	175	183
Mitotic checkpoint protein BUB3 GN=BUB3	BUB3_HUMAN	37.1547	1	3	3	5	6.87e-05	0.101	VAVEYLDPSPEVQK	0.992	25.9	25	18.1	2	0	0	1573.81	203	216
Mitotic checkpoint protein BUB3 GN=BUB3	BUB3_HUMAN	37.1547	1	3	3	5	6.87e-05	0.101	QVTDAETKPK	0.997	36.8	25	21.1	1	0	0	1116.59	315	324
Bystin GN=BYSL	BYST_HUMAN	49.6025	0.998	2	2	3	4.12e-05	0.0915	GVGGQEKHAPLADQILAGNAVR	0.997	34.6	25	34.6	0	1	0	2201.18	9	30
Bystin GN=BYSL	BYST_HUMAN	49.6025	0.998	2	2	3	4.12e-05	0.0915	ELQSAVPRDVEDVPITVE	0.994	31.2	25	31.2	2	0	0	1996.02	420	437
Basic leucine zipper and W2 domain-containing protein 2 GN=BZW2	BZW2_HUMAN	48.164	1	3	3	3	4.12e-05	0.0668	EGIAASFAVK	0.985	28.5	25	24.1	1	0	0	992.541	180	189
Basic leucine zipper and W2 domain-containing protein 2 GN=BZW2	BZW2_HUMAN	48.164	1	3	3	3	4.12e-05	0.0668	LLELFPVNR	0.997	40.5	25	34.5	1	0	0	1100.65	216	224
Basic leucine zipper and W2 domain-containing protein 2 GN=BZW2	BZW2_HUMAN	48.164	1	3	3	3	4.12e-05	0.0668	ELQKELQER	0.997	40	25	0	1	0	0	1172.63	257	265
C-1-tetrahydrofolate synthase, cytoplasmic GN=MTHFD1	C1TC_HUMAN	101.561	1	11	11	20	0.000275	0.154	APAEILNGKEISAQIR	0.997	53.8	25	53.8	0	2	0	1709.95	2	17
C-1-tetrahydrofolate synthase, cytoplasmic GN=MTHFD1	C1TC_HUMAN	101.561	1	11	11	20	0.000275	0.154	GDLNDCFIPCTPK	0.997	29.2	25	29.2	1	0	0	1536.68	138	150
C-1-tetrahydrofolate synthase, cytoplasmic GN=MTHFD1	C1TC_HUMAN	101.561	1	11	11	20	0.000275	0.154	VVGDVAYDEAKER	0.997	65.1	25	61.8	1	0	0	1450.72	252	264
C-1-tetrahydrofolate synthase, cytoplasmic GN=MTHFD1	C1TC_HUMAN	101.561	1	11	11	20	0.000275	0.154	TPVPSDIDISR	0.996	28.9	25	28.4	3	0	0	1199.63	314	324
C-1-tetrahydrofolate synthase, cytoplasmic GN=MTHFD1	C1TC_HUMAN	101.561	1	11	11	20	0.000275	0.154	VLLSALER	0.997	42.6	25	28.1	2	0	0	900.551	355	362
C-1-tetrahydrofolate synthase, cytoplasmic GN=MTHFD1	C1TC_HUMAN	101.561	1	11	11	20	0.000275	0.154	YVVVTGITPTPLGEGK	0.997	50	25	50	2	0	0	1630.91	371	386
C-1-tetrahydrofolate synthase, cytoplasmic GN=MTHFD1	C1TC_HUMAN	101.561	1	11	11	20	0.000275	0.154	FSDIQIRR	0.982	23	25	11.9	2	0	0	1034.57	489	496
C-1-tetrahydrofolate synthase, cytoplasmic GN=MTHFD1	C1TC_HUMAN	101.561	1	11	11	20	0.000275	0.154	YSGLCPHVVVLVATVR	0.997	52.3	25	50.8	0	2	0	1769.97	687	702
C-1-tetrahydrofolate synthase, cytoplasmic GN=MTHFD1	C1TC_HUMAN	101.561	1	11	11	20	0.000275	0.154	ALKMHGGGPTVTAGLPLPK	0.993	21.1	25	21.1	0	1	0	1845.04	703	721
C-1-tetrahydrofolate synthase, cytoplasmic GN=MTHFD1	C1TC_HUMAN	101.561	1	11	11	20	0.000275	0.154	QGFGNLPICMAK	0.997	36.5	25	34.7	2	0	0	1335.65	855	866
C-1-tetrahydrofolate synthase, cytoplasmic GN=MTHFD1	C1TC_HUMAN	101.561	1	11	11	20	0.000275	0.154	THLSLSHNPEQK	0.997	54.2	25	47.3	2	0	0	1390.71	867	878
Monofunctional C1-tetrahydrofolate synthase, mitochondrial GN=MTHFD1L	C1TM_HUMAN	105.792	1	10	11	23	0.000316	0.117	LVRGDAHECFVSPVAK	0.997	23.3	25	23.3	0	1	0	1784.91	190	205
Monofunctional C1-tetrahydrofolate synthase, mitochondrial GN=MTHFD1L	C1TM_HUMAN	105.792	1	10	11	23	0.000316	0.117	GDAHECFVSPVAK	0.982	25.5	25	25.5	1	0	0	1416.66	193	205
Monofunctional C1-tetrahydrofolate synthase, mitochondrial GN=MTHFD1L	C1TM_HUMAN	105.792	1	10	11	23	0.000316	0.117	LQPLSPVPSDIEISR	0.997	47.2	25	45.3	3	0	0	1650.91	353	367
Monofunctional C1-tetrahydrofolate synthase, mitochondrial GN=MTHFD1L	C1TM_HUMAN	105.792	1	10	11	23	0.000316	0.117	VRLSVLER	0.984	22.8	25	15.3	1	0	0	971.6	398	405
Monofunctional C1-tetrahydrofolate synthase, mitochondrial GN=MTHFD1L	C1TM_HUMAN	105.792	1	10	11	23	0.000316	0.117	ILHENTQTDK	0.951	20.8	25	16.1	1	0	0	1198.61	507	516
Monofunctional C1-tetrahydrofolate synthase, mitochondrial GN=MTHFD1L	C1TM_HUMAN	105.792	1	10	11	23	0.000316	0.117	ASGLVPNVVVLVATVR	0.997	78.6	25	78.6	5	3	0	1593.97	730	745
Monofunctional C1-tetrahydrofolate synthase, mitochondrial GN=MTHFD1L	C1TM_HUMAN	105.792	1	10	11	23	0.000316	0.117	TIAQAVYGAK	0.997	33.2	25	27.3	2	0	0	1021.57	871	880
Monofunctional C1-tetrahydrofolate synthase, mitochondrial GN=MTHFD1L	C1TM_HUMAN	105.792	1	10	11	23	0.000316	0.117	DIELSPEAQAK	0.997	43.9	25	30.3	2	0	0	1200.61	881	891
Monofunctional C1-tetrahydrofolate synthase, mitochondrial GN=MTHFD1L	C1TM_HUMAN	105.792	1	10	11	23	0.000316	0.117	IDRYTQQGFGNLPICMAK	0.997	41.1	25	37.9	0	2	0	2112.04	892	909
Monofunctional C1-tetrahydrofolate synthase, mitochondrial GN=MTHFD1L	C1TM_HUMAN	105.792	1	10	11	23	0.000316	0.117	DFILPISDVR	0.994	33.1	25	30.1	2	0	0	1174.65	926	935
Putative transferase CAF17, mitochondrial GN=IBA57	CAF17_HUMAN	38.1555	0.998	2	2	2	2.75e-05	0.073	LLTQDEGPALVPGGR	0.959	23.6	25	21.2	1	0	0	1522.82	198	212
Putative transferase CAF17, mitochondrial GN=IBA57	CAF17_HUMAN	38.1555	0.998	2	2	2	2.75e-05	0.073	GCYIGQELTAR	0.955	24.1	25	19.5	1	0	0	1267.61	258	268
Calmodulin-regulated spectrin-associated protein 3 GN=CAMSAP3	CAMP3_HUMAN	134.752	1	8	9	15	0.000206	0.0681	AAASLAWVLR	0.997	50	25	31.4	2	0	0	1057.62	34	43
Calmodulin-regulated spectrin-associated protein 3 GN=CAMSAP3	CAMP3_HUMAN	134.752	1	8	9	15	0.000206	0.0681	ASPAAPADGAAPAQPSIR	0.997	49.5	25	49.5	2	0	0	1647.85	192	209
Calmodulin-regulated spectrin-associated protein 3 GN=CAMSAP3	CAMP3_HUMAN	134.752	1	8	9	15	0.000206	0.0681	SVSSDSLGPPRPAPAR	0.993	19.6	25	12.6	1	1	0	1593.83	429	444
Calmodulin-regulated spectrin-associated protein 3 GN=CAMSAP3	CAMP3_HUMAN	134.752	1	8	9	15	0.000206	0.0681	RSPGPGPSQSPR	0.987	17.7	25	14.6	0	1	0	1222.63	768	779
Calmodulin-regulated spectrin-associated protein 3 GN=CAMSAP3	CAMP3_HUMAN	134.752	1	8	9	15	0.000206	0.0681	SPGPGPSQSPR	0.997	34.2	25	34.2	1	0	0	1066.53	769	779
Calmodulin-regulated spectrin-associated protein 3 GN=CAMSAP3	CAMP3_HUMAN	134.752	1	8	9	15	0.000206	0.0681	APAEEEVGPR	0.997	72.2	25	63.1	5	0	0	1054.52	964	973
Calmodulin-regulated spectrin-associated protein 3 GN=CAMSAP3	CAMP3_HUMAN	134.752	1	8	9	15	0.000206	0.0681	SGCCDDSALAR	0.997	30.8	25	30.8	1	0	0	1211.48	1020	1030
Calmodulin-regulated spectrin-associated protein 3 GN=CAMSAP3	CAMP3_HUMAN	134.752	1	8	9	15	0.000206	0.0681	LYKEPSAK	0.991	29.6	25	7.84	1	0	0	935.52	1112	1119
Cullin-associated NEDD8-dissociated protein 1 GN=CAND1	CAND1_HUMAN	136.381	1	11	14	40	0.000549	0.0951	CLGPLVSK	0.986	24.9	25.2	6.96	1	0	0	873.486	71	78
Cullin-associated NEDD8-dissociated protein 1 GN=CAND1	CAND1_HUMAN	136.381	1	11	14	40	0.000549	0.0951	TYIQCIAAISR	0.997	67.9	25	52	4	0	0	1295.68	233	243
Cullin-associated NEDD8-dissociated protein 1 GN=CAND1	CAND1_HUMAN	136.381	1	11	14	40	0.000549	0.0951	TVSPALISR	0.997	39.8	25	24.5	1	0	0	943.557	374	382
Cullin-associated NEDD8-dissociated protein 1 GN=CAND1	CAND1_HUMAN	136.381	1	11	14	40	0.000549	0.0951	ITSEALLVTQQLVK	0.997	35.1	25	35.1	3	0	0	1542.91	535	548
Cullin-associated NEDD8-dissociated protein 1 GN=CAND1	CAND1_HUMAN	136.381	1	11	14	40	0.000549	0.0951	AADIDQEVKER	0.997	61.4	25	54.3	3	3	0	1273.64	578	588
Cullin-associated NEDD8-dissociated protein 1 GN=CAND1	CAND1_HUMAN	136.381	1	11	14	40	0.000549	0.0951	ALTLIAGSPLK	0.997	59.3	25	56.7	6	0	0	1083.68	631	641
Cullin-associated NEDD8-dissociated protein 1 GN=CAND1	CAND1_HUMAN	136.381	1	11	14	40	0.000549	0.0951	EGPAVVGQFIQDVK	0.997	35.7	25	35.7	4	0	0	1486.79	813	826
Cullin-associated NEDD8-dissociated protein 1 GN=CAND1	CAND1_HUMAN	136.381	1	11	14	40	0.000549	0.0951	EGPAVVGQFIQDVKNSR	0.997	75.2	25	75.2	2	2	0	1843.97	813	829
Cullin-associated NEDD8-dissociated protein 1 GN=CAND1	CAND1_HUMAN	136.381	1	11	14	40	0.000549	0.0951	LTLIDPETLLPR	0.997	51.5	25	51.5	4	0	0	1380.81	958	969
Cullin-associated NEDD8-dissociated protein 1 GN=CAND1	CAND1_HUMAN	136.381	1	11	14	40	0.000549	0.0951	LKGYLISGSSYAR	0.997	38.6	25	30.2	3	3	0	1414.77	970	982
Cullin-associated NEDD8-dissociated protein 1 GN=CAND1	CAND1_HUMAN	136.381	1	11	14	40	0.000549	0.0951	TLEDPDLNVRR	0.945	19.7	25	7.16	1	0	0	1327.7	1014	1024
Cullin-associated NEDD8-dissociated protein 2 GN=CAND2	CAND2_HUMAN	135.26	0.998	2	2	3	4.12e-05	0.0162	VPTSPTAIR	0.952	19	25	16	1	0	0	941.542	227	235
Cullin-associated NEDD8-dissociated protein 2 GN=CAND2	CAND2_HUMAN	135.26	0.998	2	2	3	4.12e-05	0.0162	TLIQCLGSVGR	0.997	41.3	25	34.5	2	0	0	1203.65	236	246
F-actin-capping protein subunit alpha-1 GN=CAPZA1	CAZA1_HUMAN	32.9492	0.998	2	2	3	4.12e-05	0.0594	LLLNNDNLLR	0.995	29.1	25	23.6	1	0	0	1197.7	38	47
F-actin-capping protein subunit alpha-1 GN=CAPZA1	CAZA1_HUMAN	32.9492	0.998	2	2	3	4.12e-05	0.0594	RQLPVTR	0.997	30.5	25	16.6	2	0	0	869.532	260	266
Carbonyl reductase [NADPH] 1 GN=CBR1	CBR1_HUMAN	30.3748	1	5	6	18	0.000247	0.181	LFSGDVVLTAR	0.997	58.3	25	52.2	2	0	0	1177.66	28	38
Carbonyl reductase [NADPH] 1 GN=CBR1	CBR1_HUMAN	30.3748	1	5	6	18	0.000247	0.181	DVTRGQAAVQQLQAEGLSPR	0.997	28.5	25	25.5	0	2	0	2124.12	39	58
Carbonyl reductase [NADPH] 1 GN=CBR1	CBR1_HUMAN	30.3748	1	5	6	18	0.000247	0.181	GQAAVQQLQAEGLSPR	0.997	80.7	25	75.9	4	0	0	1652.87	43	58
Carbonyl reductase [NADPH] 1 GN=CBR1	CBR1_HUMAN	30.3748	1	5	6	18	0.000247	0.181	VVNVSSIMSVR	0.997	67.3	25	64.6	6	0	0	1190.66	135	145
Carbonyl reductase [NADPH] 1 GN=CBR1	CBR1_HUMAN	30.3748	1	5	6	18	0.000247	0.181	IGVTVLSR	0.997	38.5	25	0	4	0	0	844.525	199	206
Cystathionine beta-synthase GN=CBS	CBS_HUMAN	60.5873	0.999	2	2	3	4.12e-05	0.0381	SNDEEAFTFAR	0.997	56.4	25	56.4	2	0	0	1286.56	326	336
Cystathionine beta-synthase GN=CBS	CBS_HUMAN	60.5873	0.999	2	2	3	4.12e-05	0.0381	AAQELQEGQR	0.997	54.8	25	44.3	1	0	0	1129.56	360	369
COBW domain-containing protein 2 GN=CBWD2	CBWD2_HUMAN	44.035	1	2	2	2	2.75e-05	0.0759	IPVTIITGYLGAGK	0.976	36.6	25	36.6	1	0	0	1402.83	42	55
COBW domain-containing protein 2 GN=CBWD2	CBWD2_HUMAN	44.035	1	2	2	2	2.75e-05	0.0759	VAVILNEFGEGSALEK	0.997	55.8	25	55.8	1	0	0	1675.89	71	86
Coiled-coil domain-containing protein 137 GN=CCDC137	CC137_HUMAN	33.2316	1	4	4	7	9.62e-05	0.208	KGESDGAYIHR	0.997	27.6	25	24.3	0	2	0	1232.6	118	128
Coiled-coil domain-containing protein 137 GN=CCDC137	CC137_HUMAN	33.2316	1	4	4	7	9.62e-05	0.208	NQAIRQPEVQAAPK	0.996	37	25	29.7	1	0	0	1549.84	142	155
Coiled-coil domain-containing protein 137 GN=CCDC137	CC137_HUMAN	33.2316	1	4	4	7	9.62e-05	0.208	FGEVVLQPPELTARPQR	0.997	23	25	23	0	2	0	1937.06	198	214
Coiled-coil domain-containing protein 137 GN=CCDC137	CC137_HUMAN	33.2316	1	4	4	7	9.62e-05	0.208	MLLSPGGVSQPLTASLAR	0.997	56.6	25	56.6	2	0	0	1797.99	230	247
Cell division cycle and apoptosis regulator protein 1 GN=CCAR1	CCAR1_HUMAN	132.824	0.998	2	2	2	2.75e-05	0.0157	IVSQPQPAR	0.953	25.1	25	23.8	1	0	0	995.563	285	293
Cell division cycle and apoptosis regulator protein 1 GN=CCAR1	CCAR1_HUMAN	132.824	0.998	2	2	2	2.75e-05	0.0157	GLKSQLIAR	0.989	25.1	25	12	1	0	0	985.615	657	665
Cell cycle and apoptosis regulator protein 2 GN=CCAR2	CCAR2_HUMAN	102.903	1	4	4	6	8.24e-05	0.0704	QGILGAQPQLIFQPHR	0.997	31.8	25	31.8	0	2	0	1803	139	154
Cell cycle and apoptosis regulator protein 2 GN=CCAR2	CCAR2_HUMAN	102.903	1	4	4	6	8.24e-05	0.0704	IQVSSEKEAAPDAGAEPITADSDPAYSSK	0.997	27.2	25	27.2	0	1	0	2934.39	281	309
Cell cycle and apoptosis regulator protein 2 GN=CCAR2	CCAR2_HUMAN	102.903	1	4	4	6	8.24e-05	0.0704	VVTQNICQYR	0.997	33.9	25	33.9	2	0	0	1280.64	748	757
Cell cycle and apoptosis regulator protein 2 GN=CCAR2	CCAR2_HUMAN	102.903	1	4	4	6	8.24e-05	0.0704	LTPLQLEIQR	0.996	28.8	25	28	1	0	0	1210.72	896	905
Cell division cycle 5-like protein GN=CDC5L	CDC5L_HUMAN	92.2542	1	2	2	2	2.75e-05	0.00998	IASLLHR	0.988	25.9	25	20.4	1	0	0	809.499	34	40
Cell division cycle 5-like protein GN=CDC5L	CDC5L_HUMAN	92.2542	1	2	2	2	2.75e-05	0.00998	IASLLHRK	0.951	20.7	25	20.7	1	0	0	937.594	34	41
Cyclin-dependent kinase 1 GN=CDK1	CDK1_HUMAN	34.0973	1	13	18	40	0.000549	0.391	IGEGTYGVVYK	0.997	78.1	25	32	3	0	0	1185.62	10	20
Cyclin-dependent kinase 1 GN=CDK1	CDK1_HUMAN	34.0973	1	13	18	40	0.000549	0.391	IGEGTYGVVYKGR	0.997	82.7	25	43.8	2	2	0	1398.74	10	22
Cyclin-dependent kinase 1 GN=CDK1	CDK1_HUMAN	34.0973	1	13	18	40	0.000549	0.391	HKTTGQVVAMK	0.997	49.1	25	42.8	2	1	0	1199.66	23	33
Cyclin-dependent kinase 1 GN=CDK1	CDK1_HUMAN	34.0973	1	13	18	40	0.000549	0.391	TTGQVVAMKK	0.997	36.8	25	28	4	0	0	1062.6	25	34
Cyclin-dependent kinase 1 GN=CDK1	CDK1_HUMAN	34.0973	1	13	18	40	0.000549	0.391	IRLESEEEGVPSTAIR	0.997	68.1	25	68.1	3	2	0	1785.93	35	50
Cyclin-dependent kinase 1 GN=CDK1	CDK1_HUMAN	34.0973	1	13	18	40	0.000549	0.391	LESEEEGVPSTAIR	0.997	31	25	27.8	2	0	0	1516.75	37	50
Cyclin-dependent kinase 1 GN=CDK1	CDK1_HUMAN	34.0973	1	13	18	40	0.000549	0.391	EISLLKELR	0.997	30.2	25	12.7	1	0	0	1100.67	51	59
Cyclin-dependent kinase 1 GN=CDK1	CDK1_HUMAN	34.0973	1	13	18	40	0.000549	0.391	DLKPQNLLIDDKGTIK	0.997	60.3	25	60.3	1	3	0	1811.03	128	143
Cyclin-dependent kinase 1 GN=CDK1	CDK1_HUMAN	34.0973	1	13	18	40	0.000549	0.391	LADFGLAR	0.997	43.5	25	0	4	0	0	862.478	144	151
Cyclin-dependent kinase 1 GN=CDK1	CDK1_HUMAN	34.0973	1	13	18	40	0.000549	0.391	SPEVLLGSAR	0.997	81	25	67.2	4	0	0	1028.57	171	180
Cyclin-dependent kinase 1 GN=CDK1	CDK1_HUMAN	34.0973	1	13	18	40	0.000549	0.391	WKPGSLASHVK	0.972	15.6	25	15.6	0	1	0	1209.67	244	254
Cyclin-dependent kinase 1 GN=CDK1	CDK1_HUMAN	34.0973	1	13	18	40	0.000549	0.391	NLDENGLDLLSK	0.997	71.2	25	53.6	4	0	0	1330.69	255	266
Cyclin-dependent kinase 1 GN=CDK1	CDK1_HUMAN	34.0973	1	13	18	40	0.000549	0.391	MLIYDPAKR	0.997	37.8	25	27.3	1	0	0	1122.6	267	275
Cyclin-dependent kinase 2 GN=CDK2	CDK2_HUMAN	33.9307	1	5	7	11	0.000151	0.302	IGEGTYGVVYK	0.997	78.1	25	32	3	0	0	1185.62	10	20
Cyclin-dependent kinase 2 GN=CDK2	CDK2_HUMAN	33.9307	1	5	7	11	0.000151	0.302	IRLDTETEGVPSTAIR	0.997	38.5	25	38.5	2	1	0	1757.94	35	50
Cyclin-dependent kinase 2 GN=CDK2	CDK2_HUMAN	33.9307	1	5	7	11	0.000151	0.302	ELNHPNIVK	0.987	23.8	25	13.4	2	0	0	1063.59	57	65
Cyclin-dependent kinase 2 GN=CDK2	CDK2_HUMAN	33.9307	1	5	7	11	0.000151	0.302	FMDASALTGIPLPLIK	0.997	55.3	25	55.3	2	0	0	1702.95	90	105
Cyclin-dependent kinase 2 GN=CDK2	CDK2_HUMAN	33.9307	1	5	7	11	0.000151	0.302	DLKPQNLLINTEGAIK	0.997	35.8	25	35.8	1	1	0	1767	127	142
Cyclin-dependent kinase 2 GN=CDK2	CDK2_HUMAN	33.9307	1	5	7	11	0.000151	0.302	LADFGLAR	0.997	43.5	25	0	4	0	0	862.478	143	150
Cyclin-dependent kinase 2 GN=CDK2	CDK2_HUMAN	33.9307	1	5	7	11	0.000151	0.302	ALFPGDSEIDQLFR	0.997	72.5	25	69.4	2	0	0	1607.81	201	214
Cyclin-dependent kinase-like 5 GN=CDKL5	CDKL5_HUMAN	115.54	0.998	2	2	3	4.12e-05	0.0146	LCDFGFAR	0.997	33.6	25	14	2	0	0	985.456	151	158
Cyclin-dependent kinase-like 5 GN=CDKL5	CDKL5_HUMAN	115.54	0.998	2	2	3	4.12e-05	0.0146	NSFSEIR	0.989	24.4	25	16.1	1	0	0	852.421	869	875
CCAAT/enhancer-binding protein zeta GN=CEBPZ	CEBPZ_HUMAN	120.978	1	3	4	4	5.49e-05	0.0332	INNKNTAESQR	0.997	35	25	30.4	1	0	0	1274.64	123	133
CCAAT/enhancer-binding protein zeta GN=CEBPZ	CEBPZ_HUMAN	120.978	1	3	4	4	5.49e-05	0.0332	MLSALLTGVNR	0.997	48.9	25	48.9	1	0	0	1174.66	482	492
CCAAT/enhancer-binding protein zeta GN=CEBPZ	CEBPZ_HUMAN	120.978	1	3	4	4	5.49e-05	0.0332	GKENTDSVVMQPK	0.995	28.5	25	28.5	2	0	0	1432.71	769	781
Cat eye syndrome critical region protein 5 GN=CECR5	CECR5_HUMAN	46.3216	1	5	6	13	0.000179	0.102	RLVNSQGQLR	0.953	20.1	25	11.9	1	0	0	1170.67	73	82
Cat eye syndrome critical region protein 5 GN=CECR5	CECR5_HUMAN	46.3216	1	5	6	13	0.000179	0.102	LVNSQGQLR	0.994	26.4	25	6.31	2	0	0	1014.57	74	82
Cat eye syndrome critical region protein 5 GN=CECR5	CECR5_HUMAN	46.3216	1	5	6	13	0.000179	0.102	LFSEYHEKR	0.995	28.2	25	20.5	1	0	0	1208.61	125	133
Cat eye syndrome critical region protein 5 GN=CECR5	CECR5_HUMAN	46.3216	1	5	6	13	0.000179	0.102	NVVTVDELR	0.997	34	25	23.8	2	0	0	1044.57	153	161
Cat eye syndrome critical region protein 5 GN=CECR5	CECR5_HUMAN	46.3216	1	5	6	13	0.000179	0.102	ATHDGAPELGAGGTR	0.997	47.2	25	44	3	4	0	1409.68	332	346
Major centromere autoantigen B GN=CENPB	CENPB_HUMAN	65.1714	0.999	2	2	2	2.75e-05	0.0351	HGVVSCSGVAR	0.997	42.5	25	38.4	1	0	0	1128.56	130	140
Major centromere autoantigen B GN=CENPB	CENPB_HUMAN	65.1714	0.999	2	2	2	2.75e-05	0.0351	GGVTTQALAK	0.997	32	25	21.7	1	0	0	945.537	267	276
Centromere protein V GN=CENPV	CENPV_HUMAN	29.9462	1	8	12	23	0.000316	0.404	SGASGASAAPAASAAAALAPSATR	0.997	56	25	50.1	2	1	0	1985	18	41
Centromere protein V GN=CENPV	CENPV_HUMAN	29.9462	1	8	12	23	0.000316	0.404	SASQAGSKSQAVEKPPSEKPR	0.957	15.8	25	15.8	0	1	0	2169.13	45	65
Centromere protein V GN=CENPV	CENPV_HUMAN	29.9462	1	8	12	23	0.000316	0.404	SQAVEKPPSEKPR	0.997	36	25	32.2	2	2	0	1452.78	53	65
Centromere protein V GN=CENPV	CENPV_HUMAN	29.9462	1	8	12	23	0.000316	0.404	QKLTSEGAAK	0.958	21.3	25	18.1	1	0	0	1032.57	125	134
Centromere protein V GN=CENPV	CENPV_HUMAN	29.9462	1	8	12	23	0.000316	0.404	LLLDTFEYQGLVK	0.997	70.3	25	57.5	4	0	0	1538.85	135	147
Centromere protein V GN=CENPV	CENPV_HUMAN	29.9462	1	8	12	23	0.000316	0.404	GAEHITTYTFNTHK	0.997	63.3	25	60.9	2	2	0	1619.78	197	210
Centromere protein V GN=CENPV	CENPV_HUMAN	29.9462	1	8	12	23	0.000316	0.404	CGVQSFYTPR	0.997	55.1	25	44.9	2	0	0	1214.56	219	228
Centromere protein V GN=CENPV	CENPV_HUMAN	29.9462	1	8	12	23	0.000316	0.404	SNPGGFGIAPHCLDEGTVR	0.997	42.4	25	40.4	2	2	0	1983.93	229	247
UPF0488 protein C8orf33 GN=C8orf33	CH033_HUMAN	24.9928	0.998	2	2	3	4.12e-05	0.114	QKEQAIGAIR	0.991	24.9	25	13.4	1	0	0	1113.64	134	143
UPF0488 protein C8orf33 GN=C8orf33	CH033_HUMAN	24.9928	0.998	2	2	3	4.12e-05	0.114	AAAYSAQVQPVDGATR	0.997	63	25	54.8	2	0	0	1604.8	183	198
60 kDa heat shock protein, mitochondrial GN=HSPD1	CH60_HUMAN	61.0557	1	11	15	26	0.000357	0.25	VTKDGVTVAK	0.997	40.8	25	22.2	2	0	0	1017.59	73	82
60 kDa heat shock protein, mitochondrial GN=HSPD1	CH60_HUMAN	61.0557	1	11	15	26	0.000357	0.25	LVQDVANNTNEEAGDGTTTATVLAR	0.997	147	25	147	2	3	0	2560.25	97	121
60 kDa heat shock protein, mitochondrial GN=HSPD1	CH60_HUMAN	61.0557	1	11	15	26	0.000357	0.25	GANPVEIRR	0.997	32	25	21	2	0	0	1011.57	134	142
60 kDa heat shock protein, mitochondrial GN=HSPD1	CH60_HUMAN	61.0557	1	11	15	26	0.000357	0.25	ISSIQSIVPALEIANAHR	0.997	29.9	25	29.9	0	1	0	1919.07	251	268
60 kDa heat shock protein, mitochondrial GN=HSPD1	CH60_HUMAN	61.0557	1	11	15	26	0.000357	0.25	VGLQVVAVK	0.997	43.6	25	43.6	1	0	0	912.588	293	301
60 kDa heat shock protein, mitochondrial GN=HSPD1	CH60_HUMAN	61.0557	1	11	15	26	0.000357	0.25	APGFGDNRK	0.958	33.6	25	22.8	1	0	0	961.485	302	310
60 kDa heat shock protein, mitochondrial GN=HSPD1	CH60_HUMAN	61.0557	1	11	15	26	0.000357	0.25	VGEVIVTKDDAMLLK	0.997	36.6	25	30.5	2	1	0	1630.91	345	359
60 kDa heat shock protein, mitochondrial GN=HSPD1	CH60_HUMAN	61.0557	1	11	15	26	0.000357	0.25	LSDGVAVLK	0.997	46.2	25	27	2	0	0	901.535	397	405
60 kDa heat shock protein, mitochondrial GN=HSPD1	CH60_HUMAN	61.0557	1	11	15	26	0.000357	0.25	AAVEEGIVLGGGCALLR	0.997	87	25	84	3	2	0	1684.91	430	446
60 kDa heat shock protein, mitochondrial GN=HSPD1	CH60_HUMAN	61.0557	1	11	15	26	0.000357	0.25	NAGVEGSLIVEK	0.997	45.6	25	32.2	2	0	0	1215.66	482	493
60 kDa heat shock protein, mitochondrial GN=HSPD1	CH60_HUMAN	61.0557	1	11	15	26	0.000357	0.25	GIIDPTKVVR	0.997	30.6	25	20.8	2	0	0	1097.67	517	526
Chromodomain-helicase-DNA-binding protein 1-like GN=CHD1L	CHD1L_HUMAN	100.988	1	4	4	5	6.87e-05	0.0457	GGQAPGFLLR	0.985	25.1	25	8.44	1	0	0	1015.57	10	19
Chromodomain-helicase-DNA-binding protein 1-like GN=CHD1L	CHD1L_HUMAN	100.988	1	4	4	5	6.87e-05	0.0457	SFEQLVNLQK	0.976	30.6	25	24.2	1	0	0	1205.65	591	600
Chromodomain-helicase-DNA-binding protein 1-like GN=CHD1L	CHD1L_HUMAN	100.988	1	4	4	5	6.87e-05	0.0457	GGLFTALEKR	0.997	45.5	25	39.8	2	0	0	1091.62	749	758
Chromodomain-helicase-DNA-binding protein 1-like GN=CHD1L	CHD1L_HUMAN	100.988	1	4	4	5	6.87e-05	0.0457	GIPTYIYYFPR	0.997	33.1	25	33.1	1	0	0	1389.72	867	877
Chromodomain-helicase-DNA-binding protein 2 GN=CHD2	CHD2_HUMAN	211.349	0.998	2	2	3	4.12e-05	0.0104	VLIFSQMVR	0.992	25.7	25	21.9	2	0	0	1092.62	810	818
Chromodomain-helicase-DNA-binding protein 2 GN=CHD2	CHD2_HUMAN	211.349	0.998	2	2	3	4.12e-05	0.0104	GTVEEEIIER	0.997	46.4	25	34.2	1	0	0	1174.6	919	928
Chromodomain-helicase-DNA-binding protein 4 GN=CHD4	CHD4_HUMAN	218.009	1	3	3	3	4.12e-05	0.0204	VLIFSQMTK	0.956	22	25	22	1	0	0	1082.59	1069	1077
Chromodomain-helicase-DNA-binding protein 4 GN=CHD4	CHD4_HUMAN	218.009	1	3	3	3	4.12e-05	0.0204	VGGNIEVLGFNAR	0.997	44.9	25	44.9	1	0	0	1345.72	1407	1419
Chromodomain-helicase-DNA-binding protein 4 GN=CHD4	CHD4_HUMAN	218.009	1	3	3	3	4.12e-05	0.0204	LANRAPEPTPQQVAQQQ	0.997	41.1	25	41.1	1	0	0	1875.97	1896	1912
Charged multivesicular body protein 4b GN=CHMP4B	CHM4B_HUMAN	24.9512	1	4	4	7	9.62e-05	0.143	AGKGGPTPQEAIQR	0.997	29.9	25	26.8	0	1	0	1409.75	15	28
Charged multivesicular body protein 4b GN=CHMP4B	CHM4B_HUMAN	24.9512	1	4	4	7	9.62e-05	0.143	GGPTPQEAIQR	0.997	36.4	25	29.5	2	0	0	1153.6	18	28
Charged multivesicular body protein 4b GN=CHMP4B	CHM4B_HUMAN	24.9512	1	4	4	7	9.62e-05	0.143	KIEQELTAAK	0.978	22.1	25	18	2	0	0	1130.64	46	55
Charged multivesicular body protein 4b GN=CHMP4B	CHM4B_HUMAN	24.9512	1	4	4	7	9.62e-05	0.143	AALQALKR	0.997	33.9	25	11.6	2	0	0	870.552	64	71
Chromatin target of PRMT1 protein GN=CHTOP	CHTOP_HUMAN	26.3978	1	5	10	20	0.000275	0.246	NKQPTPVNIR	0.984	23.5	25	15.8	2	0	0	1166.66	29	38
Chromatin target of PRMT1 protein GN=CHTOP	CHTOP_HUMAN	26.3978	1	5	10	20	0.000275	0.246	ASMQQQQQLASAR	0.997	74.3	25	61.6	6	0	0	1462.71	39	51
Chromatin target of PRMT1 protein GN=CHTOP	CHTOP_HUMAN	26.3978	1	5	10	20	0.000275	0.246	LAQQMENRPSVQAALK	0.997	50.9	25	37.1	3	3	0	1783.95	55	70
Chromatin target of PRMT1 protein GN=CHTOP	CHTOP_HUMAN	26.3978	1	5	10	20	0.000275	0.246	LGKSNIQAR	0.997	38.8	25	36.6	2	0	0	986.574	79	87
Chromatin target of PRMT1 protein GN=CHTOP	CHTOP_HUMAN	26.3978	1	5	10	20	0.000275	0.246	EQLDNQLDAYMSK	0.997	73.6	25	73.6	4	0	0	1570.71	214	226
Probable cytosolic iron-sulfur protein assembly protein CIAO1 GN=CIAO1	CIAO1_HUMAN	37.8389	0.999	2	2	5	6.87e-05	0.059	SVLSEGHQR	0.997	47.8	25	36.5	4	0	0	1012.52	54	62
Probable cytosolic iron-sulfur protein assembly protein CIAO1 GN=CIAO1	CIAO1_HUMAN	37.8389	0.999	2	2	5	6.87e-05	0.059	LASCSDDRTVR	0.984	17.1	25	15.3	0	1	0	1279.61	209	219
Cytoskeleton-associated protein 5 GN=CKAP5	CKAP5_HUMAN	225.502	1	5	5	7	9.62e-05	0.029	TTGEVVSGVVSK	0.997	43.5	25	24	2	0	0	1162.63	85	96
Cytoskeleton-associated protein 5 GN=CKAP5	CKAP5_HUMAN	225.502	1	5	5	7	9.62e-05	0.029	QQTSLFIAR	0.98	24.1	25	21.7	1	0	0	1063.59	414	422
Cytoskeleton-associated protein 5 GN=CKAP5	CKAP5_HUMAN	225.502	1	5	5	7	9.62e-05	0.029	TEISDKITSELVSK	0.997	49	25	46.1	2	0	0	1549.83	855	868
Cytoskeleton-associated protein 5 GN=CKAP5	CKAP5_HUMAN	225.502	1	5	5	7	9.62e-05	0.029	AQNISSNANMLR	0.997	40	25	30.2	1	0	0	1318.65	1442	1453
Cytoskeleton-associated protein 5 GN=CKAP5	CKAP5_HUMAN	225.502	1	5	5	7	9.62e-05	0.029	NSSQFFQSYVER	0.997	51.9	25	51.9	1	0	0	1491.69	1871	1882
Clathrin heavy chain 1 GN=CLTC	CLH1_HUMAN	191.619	1	9	9	19	0.000261	0.0693	NNLAGAEELFAR	0.997	68.7	25	63.9	2	0	0	1304.66	355	366
Clathrin heavy chain 1 GN=CLTC	CLH1_HUMAN	191.619	1	9	9	19	0.000261	0.0693	KFNALFAQGNYSEAAK	0.993	19.3	25	19.3	0	1	0	1758.88	367	382
Clathrin heavy chain 1 GN=CLTC	CLH1_HUMAN	191.619	1	9	9	19	0.000261	0.0693	SVDPTLALSVYLR	0.997	58.5	25	58.5	3	0	0	1433.8	469	481
Clathrin heavy chain 1 GN=CLTC	CLH1_HUMAN	191.619	1	9	9	19	0.000261	0.0693	ALEHFTDLYDIKR	0.997	42.3	25	42.3	0	3	0	1620.84	626	638
Clathrin heavy chain 1 GN=CLTC	CLH1_HUMAN	191.619	1	9	9	19	0.000261	0.0693	TGQIKEVER	0.997	36.2	25	19.5	2	0	0	1059.58	738	746
Clathrin heavy chain 1 GN=CLTC	CLH1_HUMAN	191.619	1	9	9	19	0.000261	0.0693	IYIDSNNNPER	0.997	56.5	25	48.7	2	0	0	1334.63	882	892
Clathrin heavy chain 1 GN=CLTC	CLH1_HUMAN	191.619	1	9	9	19	0.000261	0.0693	LLYNNVSNFGR	0.997	51.8	25	51.8	2	0	0	1296.67	1216	1226
Clathrin heavy chain 1 GN=CLTC	CLH1_HUMAN	191.619	1	9	9	19	0.000261	0.0693	LASTLVHLGEYQAAVDGAR	0.997	29.7	25	29.7	0	3	0	1971.03	1227	1245
Clathrin heavy chain 1 GN=CLTC	CLH1_HUMAN	191.619	1	9	9	19	0.000261	0.0693	VKQLPLVKPYLR	0.995	20.1	25	20.1	0	1	0	1453.93	1442	1453
Putative ATP-dependent Clp protease proteolytic subunit, mitochondrial GN=CLPP	CLPP_HUMAN	30.1805	0.998	2	2	4	5.49e-05	0.065	HSLPNSR	0.994	28.8	25	21.7	2	0	0	810.422	168	174
Putative ATP-dependent Clp protease proteolytic subunit, mitochondrial GN=CLPP	CLPP_HUMAN	30.1805	0.998	2	2	4	5.49e-05	0.065	IMIHQPSGGAR	0.994	27.9	25	20.3	2	0	0	1182.61	175	185
Calcium-binding mitochondrial carrier protein Aralar1 GN=SLC25A12	CMC1_HUMAN	74.764	0.999	2	2	3	4.12e-05	0.121	IAPLAEGALPYNLAELQR	0.997	22	25	22	0	1	0	1939.06	292	309
Calcium-binding mitochondrial carrier protein Aralar1 GN=SLC25A12	CMC1_HUMAN	74.764	0.999	2	2	3	4.12e-05	0.121	YEGFFGLYR	0.997	52.3	25	47.9	2	0	0	1151.55	382	390
Calcium-binding mitochondrial carrier protein Aralar1 GN=SLC25A12	CMC1_HUMAN	74.764	0.999	2	2	3	4.12e-05	0.121	GLIPQLIGVAPEK	0.997	48.6	25	0	2	0	0	1334.8	391	403
Calcium-binding mitochondrial carrier protein Aralar1 GN=SLC25A12	CMC1_HUMAN	74.764	0.999	2	2	3	4.12e-05	0.121	AIKLTVNDFVR	0.997	36.2	25	34.9	2	2	0	1275.74	404	414
Calcium-binding mitochondrial carrier protein Aralar1 GN=SLC25A12	CMC1_HUMAN	74.764	0.999	2	2	3	4.12e-05	0.121	LTVNDFVR	0.997	50.8	25	43.1	2	0	0	963.526	407	414
Calcium-binding mitochondrial carrier protein Aralar1 GN=SLC25A12	CMC1_HUMAN	74.764	0.999	2	2	3	4.12e-05	0.121	VSALNVLR	0.997	34.2	25	22.8	2	0	0	871.536	466	473
Calcium-binding mitochondrial carrier protein Aralar1 GN=SLC25A12	CMC1_HUMAN	74.764	0.999	2	2	3	4.12e-05	0.121	TRLQVAAR	0.982	22.4	25	7.3	2	0	0	914.553	544	551
Calcium-binding mitochondrial carrier protein Aralar1 GN=SLC25A12	CMC1_HUMAN	74.764	0.999	2	2	3	4.12e-05	0.121	AGQTTYSGVIDCFR	0.997	62.8	25	62.8	2	0	0	1574.73	552	565
Calcium-binding mitochondrial carrier protein Aralar1 GN=SLC25A12	CMC1_HUMAN	74.764	0.999	2	2	3	4.12e-05	0.121	AGQTTYSGVIDCFRK	0.997	76.4	25	76.4	2	0	0	1702.82	552	566
Calcium-binding mitochondrial carrier protein Aralar2 GN=SLC25A13	CMC2_HUMAN	74.1772	1	18	21	40	0.000549	0.27	YLNIFGESQPNPK	0.997	75.1	25	73.4	2	0	0	1506.76	44	56
Calcium-binding mitochondrial carrier protein Aralar2 GN=SLC25A13	CMC2_HUMAN	74.1772	1	18	21	40	0.000549	0.27	TVELLSGVVDQTK	0.997	58.6	25	47.5	2	0	0	1388.76	57	69
Calcium-binding mitochondrial carrier protein Aralar2 GN=SLC25A13	CMC2_HUMAN	74.1772	1	18	21	40	0.000549	0.27	DVEVTKEEFVLAAQK	0.997	62.1	25	57.3	2	1	0	1705.9	246	260
Calcium-binding mitochondrial carrier protein Aralar2 GN=SLC25A13	CMC2_HUMAN	74.1772	1	18	21	40	0.000549	0.27	MTLADIER	0.997	33.8	25	27.7	2	0	0	948.482	285	292
Calcium-binding mitochondrial carrier protein Aralar2 GN=SLC25A13	CMC2_HUMAN	74.1772	1	18	21	40	0.000549	0.27	IAPLEEGTLPFNLAEAQR	0.997	64.1	25	64.1	2	2	0	1969.04	293	310
Calcium-binding mitochondrial carrier protein Aralar2 GN=SLC25A13	CMC2_HUMAN	74.1772	1	18	21	40	0.000549	0.27	ASGDSARPVLLQVAESAYR	0.997	50.8	25	50.8	0	2	0	1990.04	313	331
Calcium-binding mitochondrial carrier protein Aralar2 GN=SLC25A13	CMC2_HUMAN	74.1772	1	18	21	40	0.000549	0.27	STGSFVGELMYK	0.997	58.9	25	55.3	2	0	0	1318.63	361	372
Calcium-binding mitochondrial carrier protein Aralar2 GN=SLC25A13	CMC2_HUMAN	74.1772	1	18	21	40	0.000549	0.27	YEGFFGLYR	0.997	52.3	25	47.9	2	0	0	1151.55	384	392
Calcium-binding mitochondrial carrier protein Aralar2 GN=SLC25A13	CMC2_HUMAN	74.1772	1	18	21	40	0.000549	0.27	GLLPQLLGVAPEK	0.997	48.6	25	0	2	0	0	1334.8	393	405
Calcium-binding mitochondrial carrier protein Aralar2 GN=SLC25A13	CMC2_HUMAN	74.1772	1	18	21	40	0.000549	0.27	AIKLTVNDFVR	0.997	36.2	25	34.9	2	2	0	1275.74	406	416
Calcium-binding mitochondrial carrier protein Aralar2 GN=SLC25A13	CMC2_HUMAN	74.1772	1	18	21	40	0.000549	0.27	LTVNDFVR	0.997	50.8	25	43.1	2	0	0	963.526	409	416
Calcium-binding mitochondrial carrier protein Aralar2 GN=SLC25A13	CMC2_HUMAN	74.1772	1	18	21	40	0.000549	0.27	VSALSVVR	0.997	47.3	25	41.6	2	0	0	830.509	468	475
Calcium-binding mitochondrial carrier protein Aralar2 GN=SLC25A13	CMC2_HUMAN	74.1772	1	18	21	40	0.000549	0.27	DLGFFGIYK	0.997	34.8	25	27.9	1	0	0	1059.55	476	484
Calcium-binding mitochondrial carrier protein Aralar2 GN=SLC25A13	CMC2_HUMAN	74.1772	1	18	21	40	0.000549	0.27	DLGFFGIYKGAK	0.997	44.3	25	28.6	2	0	0	1315.7	476	487
Calcium-binding mitochondrial carrier protein Aralar2 GN=SLC25A13	CMC2_HUMAN	74.1772	1	18	21	40	0.000549	0.27	TRLQVAAR	0.982	22.4	25	7.3	2	0	0	914.553	546	553
Calcium-binding mitochondrial carrier protein Aralar2 GN=SLC25A13	CMC2_HUMAN	74.1772	1	18	21	40	0.000549	0.27	AGQTTYSGVIDCFR	0.997	62.8	25	62.8	2	0	0	1574.73	554	567
Calcium-binding mitochondrial carrier protein Aralar2 GN=SLC25A13	CMC2_HUMAN	74.1772	1	18	21	40	0.000549	0.27	AGQTTYSGVIDCFRK	0.997	76.4	25	76.4	2	0	0	1702.82	554	568
Calcium-binding mitochondrial carrier protein Aralar2 GN=SLC25A13	CMC2_HUMAN	74.1772	1	18	21	40	0.000549	0.27	ILREEGPK	0.997	40.3	25	33.3	2	0	0	941.542	569	576
Protein CMSS1 GN=CMSS1	CMS1_HUMAN	31.8854	1	4	4	10	0.000137	0.154	SEPKPGLPEDLQK	0.997	45.5	25	41.8	2	0	0	1437.76	85	97
Protein CMSS1 GN=CMSS1	CMS1_HUMAN	31.8854	1	4	4	10	0.000137	0.154	VVHLGVGTPGR	0.997	43.6	25	43.6	2	0	0	1091.63	205	215
Protein CMSS1 GN=CMSS1	CMS1_HUMAN	31.8854	1	4	4	10	0.000137	0.154	QGGLNLSPLK	0.997	48.5	25	40.6	4	0	0	1026.59	222	231
Protein CMSS1 GN=CMSS1	CMS1_HUMAN	31.8854	1	4	4	10	0.000137	0.154	SESLKLGLF	0.997	31.7	25	31.7	2	0	0	993.562	271	279
2',3'-cyclic-nucleotide 3'-phosphodiesterase GN=CNP	CN37_HUMAN	47.5806	1	6	6	9	0.000124	0.143	MVSADAYKITPGAR	0.997	42.2	25	39.2	2	0	0	1479.76	80	93
2',3'-cyclic-nucleotide 3'-phosphodiesterase GN=CNP	CN37_HUMAN	47.5806	1	6	6	9	0.000124	0.143	AGQVFLEELGNHK	0.997	68.3	25	60.9	2	0	0	1441.74	205	217
2',3'-cyclic-nucleotide 3'-phosphodiesterase GN=CNP	CN37_HUMAN	47.5806	1	6	6	9	0.000124	0.143	APGAEEYAQQDVLK	0.977	22.1	25	18.1	1	0	0	1518.74	262	275
2',3'-cyclic-nucleotide 3'-phosphodiesterase GN=CNP	CN37_HUMAN	47.5806	1	6	6	9	0.000124	0.143	APGAEEYAQQDVLKK	0.986	17.5	25	17.5	0	1	0	1646.84	262	276
2',3'-cyclic-nucleotide 3'-phosphodiesterase GN=CNP	CN37_HUMAN	47.5806	1	6	6	9	0.000124	0.143	GEEVGELSR	0.953	37.2	25	13.4	1	0	0	975.474	361	369
2',3'-cyclic-nucleotide 3'-phosphodiesterase GN=CNP	CN37_HUMAN	47.5806	1	6	6	9	0.000124	0.143	AIFTGYYGK	0.997	39.8	25	28.2	2	0	0	1019.52	392	400
Condensin complex subunit 1 GN=NCAPD2	CND1_HUMAN	157.186	1	3	3	5	6.87e-05	0.0335	ESTGNMVTGQTVCK	0.997	45.2	25	45.2	2	0	0	1527.68	584	597
Condensin complex subunit 1 GN=NCAPD2	CND1_HUMAN	157.186	1	3	3	5	6.87e-05	0.0335	DLAYCVSQLPLTER	0.997	38.5	25	38.5	1	0	0	1664.83	1225	1238
Condensin complex subunit 1 GN=NCAPD2	CND1_HUMAN	157.186	1	3	3	5	6.87e-05	0.0335	YQPLASTASDNDFVTPEPR	0.997	52	25	52	2	0	0	2107.99	1325	1343
Condensin complex subunit 3 GN=NCAPG	CND3_HUMAN	114.338	1	3	3	5	6.87e-05	0.0335	IQAVLALSR	0.997	44.2	25	33.6	2	0	0	970.604	160	168
Condensin complex subunit 3 GN=NCAPG	CND3_HUMAN	114.338	1	3	3	5	6.87e-05	0.0335	AVLSCIAPSAK	0.997	43.5	25	30.7	2	0	0	1116.61	198	208
Condensin complex subunit 3 GN=NCAPG	CND3_HUMAN	114.338	1	3	3	5	6.87e-05	0.0335	LLSDFLDSEVSELR	0.99	25.1	25	25.1	1	0	0	1622.83	695	708
Condensin-2 complex subunit D3 GN=NCAPD3	CNDD3_HUMAN	168.894	0.998	2	2	4	5.49e-05	0.0194	NSSAFSYQR	0.997	41	25	36.5	2	0	0	1059.49	506	514
Condensin-2 complex subunit D3 GN=NCAPD3	CNDD3_HUMAN	168.894	0.998	2	2	4	5.49e-05	0.0194	ASAGHVAVSSPTPETGPLQR	0.997	32.5	25	32.5	0	2	0	1962	1320	1339
CCR4-NOT transcription complex subunit 1 GN=CNOT1	CNOT1_HUMAN	266.945	1	4	4	7	9.62e-05	0.0173	SLDLIESLLR	0.997	32.8	25	24.1	2	0	0	1158.67	450	459
CCR4-NOT transcription complex subunit 1 GN=CNOT1	CNOT1_HUMAN	266.945	1	4	4	7	9.62e-05	0.0173	LAEVGQYEQVK	0.98	27.3	25	23.5	3	0	0	1263.66	460	470
CCR4-NOT transcription complex subunit 1 GN=CNOT1	CNOT1_HUMAN	266.945	1	4	4	7	9.62e-05	0.0173	NLDEQLSAPK	0.995	28.9	25	28.9	1	0	0	1114.57	1311	1320
CCR4-NOT transcription complex subunit 1 GN=CNOT1	CNOT1_HUMAN	266.945	1	4	4	7	9.62e-05	0.0173	SLLEVVVLSR	0.994	27.1	25	14.6	1	0	0	1114.68	1641	1650
Conserved oligomeric Golgi complex subunit 1 GN=COG1	COG1_HUMAN	108.981	0.999	2	2	3	4.12e-05	0.0286	QALTDFLLAR	0.991	30.7	25	30.2	1	0	0	1147.65	225	234
Conserved oligomeric Golgi complex subunit 1 GN=COG1	COG1_HUMAN	108.981	0.999	2	2	3	4.12e-05	0.0286	TSVLFGLVTGTENQLAPR	0.997	41.9	25	41.9	2	0	0	1903.03	872	889
Coilin GN=COIL	COIL_HUMAN	62.6093	0.998	2	2	4	5.49e-05	0.033	VVTDLISLIR	0.997	51.5	25	45.4	2	0	0	1128.7	37	46
Coilin GN=COIL	COIL_HUMAN	62.6093	0.998	2	2	4	5.49e-05	0.033	LVRDNDCLR	0.997	32.3	25	22.1	2	0	0	1160.58	74	82
Coatomer subunit alpha GN=COPA	COPA_HUMAN	138.349	1	13	14	23	0.000316	0.127	NLSPGAVESDVR	0.997	47.5	25	35.2	2	0	0	1243.63	171	182
Coatomer subunit alpha GN=COPA	COPA_HUMAN	138.349	1	13	14	23	0.000316	0.127	GITGVDLFGTTDAVVK	0.997	61.9	25	61.9	2	0	0	1592.85	183	198
Coatomer subunit alpha GN=COPA	COPA_HUMAN	138.349	1	13	14	23	0.000316	0.127	ASNLENSTYDLYTIPK	0.997	35.5	25	35.5	1	0	0	1828.9	383	398
Coatomer subunit alpha GN=COPA	COPA_HUMAN	138.349	1	13	14	23	0.000316	0.127	SSGLTAVWVAR	0.997	60.5	25	29.8	2	0	0	1146.63	413	423
Coatomer subunit alpha GN=COPA	COPA_HUMAN	138.349	1	13	14	23	0.000316	0.127	DADSITLFDVQQKR	0.966	30.9	25	30.9	1	0	0	1635.83	468	481
Coatomer subunit alpha GN=COPA	COPA_HUMAN	138.349	1	13	14	23	0.000316	0.127	KLDALCNIHENIR	0.965	15	25	15	0	1	0	1595.83	517	529
Coatomer subunit alpha GN=COPA	COPA_HUMAN	138.349	1	13	14	23	0.000316	0.127	TLDLPIYVTR	0.997	52.5	25	52.5	4	0	0	1190.68	563	572
Coatomer subunit alpha GN=COPA	COPA_HUMAN	138.349	1	13	14	23	0.000316	0.127	VLTIDPTEFKFK	0.981	16.7	25	16.7	0	1	0	1437.8	589	600
Coatomer subunit alpha GN=COPA	COPA_HUMAN	138.349	1	13	14	23	0.000316	0.127	KYDEVLHMVR	0.968	27.6	25	27.6	1	0	0	1289.67	607	616
Coatomer subunit alpha GN=COPA	COPA_HUMAN	138.349	1	13	14	23	0.000316	0.127	GFFEGTIASK	0.997	47.1	25	38.8	2	0	0	1056.54	816	825
Coatomer subunit alpha GN=COPA	COPA_HUMAN	138.349	1	13	14	23	0.000316	0.127	GFFEGTIASKGK	0.997	38.5	25	23.5	1	0	0	1241.65	816	827
Coatomer subunit alpha GN=COPA	COPA_HUMAN	138.349	1	13	14	23	0.000316	0.127	LLELGPKPEVAQQTR	0.997	33.7	25	32.3	1	2	0	1678.95	1128	1142
Coatomer subunit alpha GN=COPA	COPA_HUMAN	138.349	1	13	14	23	0.000316	0.127	VTTVTEIGKDVIGLR	0.997	50.5	25	50.5	2	0	0	1600.93	1203	1217
Coatomer subunit beta GN=COPB1	COPB_HUMAN	107.146	1	6	6	11	0.000151	0.0965	VLQDLVMDILR	0.997	66.4	25	55.5	3	0	0	1314.75	317	327
Coatomer subunit beta GN=COPB1	COPB_HUMAN	107.146	1	6	6	11	0.000151	0.0965	SLGEIPIVESEIKK	0.997	46.9	25	45.7	2	0	0	1541.88	482	495
Coatomer subunit beta GN=COPB1	COPB_HUMAN	107.146	1	6	6	11	0.000151	0.0965	EAGELKPEEEITVGPVQK	0.997	30.9	25	30.9	0	1	0	1953.02	496	513
Coatomer subunit beta GN=COPB1	COPB_HUMAN	107.146	1	6	6	11	0.000151	0.0965	LVTEMGTYATQSALSSSRPTK	0.997	27	25	26.1	0	2	0	2228.12	514	534
Coatomer subunit beta GN=COPB1	COPB_HUMAN	107.146	1	6	6	11	0.000151	0.0965	EAADPLASKLNK	0.995	29.1	25	19.8	1	0	0	1256.68	704	715
Coatomer subunit beta GN=COPB1	COPB_HUMAN	107.146	1	6	6	11	0.000151	0.0965	ALSGYCGFMAANLYAR	0.997	89	25	89	2	0	0	1764.82	883	898
Coatomer subunit beta' GN=COPB2	COPB2_HUMAN	102.489	0.998	2	2	4	5.49e-05	0.021	HSEVQQANLK	0.997	40.3	25	35	2	0	0	1153.6	319	328
Coatomer subunit beta' GN=COPB2	COPB2_HUMAN	102.489	0.998	2	2	4	5.49e-05	0.021	TYLPSQVSR	0.986	26.3	25	25.4	2	0	0	1050.56	760	768
Coatomer subunit delta GN=ARCN1	COPD_HUMAN	57.2112	1	3	3	5	6.87e-05	0.0763	TRIEGLLAAFPK	0.989	25.4	25	21.2	2	0	0	1315.77	27	38
Coatomer subunit delta GN=ARCN1	COPD_HUMAN	57.2112	1	3	3	5	6.87e-05	0.0763	NSNILEDLETLR	0.997	43.8	25	43.8	2	0	0	1416.73	73	84
Coatomer subunit delta GN=ARCN1	COPD_HUMAN	57.2112	1	3	3	5	6.87e-05	0.0763	LFTAESLIGLKNPEK	0.997	58.1	25	43.4	1	0	0	1659.93	337	351
Coatomer subunit epsilon GN=COPE	COPE_HUMAN	34.4829	1	3	4	7	9.62e-05	0.14	FGVVLDEIKPSSAPELQAVR	0.997	47.5	25	46.7	0	2	0	2155.18	66	85
Coatomer subunit epsilon GN=COPE	COPE_HUMAN	34.4829	1	3	4	7	9.62e-05	0.14	DSIVAELDREMSR	0.977	22.8	25	22.8	1	0	0	1520.74	98	110
Coatomer subunit epsilon GN=COPE	COPE_HUMAN	34.4829	1	3	4	7	9.62e-05	0.14	YLSQLKDAHR	0.997	38.4	25	27.8	2	2	0	1230.66	273	282
Coatomer subunit gamma-1 GN=COPG1	COPG1_HUMAN	97.7194	1	7	9	27	0.000371	0.116	SAVLQEAR	0.997	34.3	25	7.6	4	0	0	873.479	25	32
Coatomer subunit gamma-1 GN=COPG1	COPG1_HUMAN	97.7194	1	7	9	27	0.000371	0.116	ELAPAVSVLQLFCSSPK	0.997	103	25	103	4	1	0	1845.98	284	300
Coatomer subunit gamma-1 GN=COPG1	COPG1_HUMAN	97.7194	1	7	9	27	0.000371	0.116	SIATLAITTLLK	0.997	92.1	25	92.1	9	0	0	1244.78	339	350
Coatomer subunit gamma-1 GN=COPG1	COPG1_HUMAN	97.7194	1	7	9	27	0.000371	0.116	ILHLLGQEGPK	0.997	53.4	25	53.4	2	1	0	1204.71	455	465
Coatomer subunit gamma-1 GN=COPG1	COPG1_HUMAN	97.7194	1	7	9	27	0.000371	0.116	ALQQYTLEPSEKPFDLK	0.986	18.2	25	18.2	0	2	0	2007.04	561	577
Coatomer subunit gamma-1 GN=COPG1	COPG1_HUMAN	97.7194	1	7	9	27	0.000371	0.116	SSPEPVALTESETEYVIR	0.997	66.5	25	66.5	3	0	0	2006.99	632	649
Coatomer subunit gamma-1 GN=COPG1	COPG1_HUMAN	97.7194	1	7	9	27	0.000371	0.116	SLPYNQPGTCYTLVALPK	0.997	40.4	25	38.4	1	0	0	2022.04	697	714
Coatomer subunit gamma-2 GN=COPG2	COPG2_HUMAN	97.6245	1	4	5	10	0.000137	0.0792	SAVLQEAR	0.997	34.3	25	7.6	4	0	0	873.479	25	32
Coatomer subunit gamma-2 GN=COPG2	COPG2_HUMAN	97.6245	1	4	5	10	0.000137	0.0792	IFNETPINPR	0.997	38.5	25	32.7	2	0	0	1200.64	33	42
Coatomer subunit gamma-2 GN=COPG2	COPG2_HUMAN	97.6245	1	4	5	10	0.000137	0.0792	ISYDVVKR	0.997	57.1	25	47	2	0	0	979.557	169	176
Coatomer subunit gamma-2 GN=COPG2	COPG2_HUMAN	97.6245	1	4	5	10	0.000137	0.0792	SIATLAITTLLK	0.997	92.1	25	92.1	9	0	0	1244.78	339	350
Coatomer subunit gamma-2 GN=COPG2	COPG2_HUMAN	97.6245	1	4	5	10	0.000137	0.0792	FIFNRVVLENEAVR	0.997	34.2	25	34.2	2	2	0	1705.94	475	488
Coatomer subunit gamma-2 GN=COPG2	COPG2_HUMAN	97.6245	1	4	5	10	0.000137	0.0792	SSEPVQLTEAETEYFVR	0.997	72.8	25	71.6	2	0	0	1984.95	630	646
COUP transcription factor 2 GN=NR2F2	COT2_HUMAN	45.5708	0.998	2	2	2	2.75e-05	0.0531	SQCALEEYVR	0.995	30.7	25	24.5	1	0	0	1254.58	341	350
COUP transcription factor 2 GN=NR2F2	COT2_HUMAN	45.5708	0.998	2	2	2	2.75e-05	0.0531	SQYPNQPTRFGK	0.964	21.2	25	21.2	1	0	0	1422.71	351	362
Cleavage and polyadenylation specificity factor subunit 1 GN=CPSF1	CPSF1_HUMAN	160.886	1	8	8	22	0.000302	0.0693	CAAMLVYGTR	0.991	27.4	25	27.4	1	0	0	1141.55	149	158
Cleavage and polyadenylation specificity factor subunit 1 GN=CPSF1	CPSF1_HUMAN	160.886	1	8	8	22	0.000302	0.0693	ESLAEEHEGLVGEGQR	0.99	19.8	25	19.8	0	1	0	1739.82	167	182
Cleavage and polyadenylation specificity factor subunit 1 GN=CPSF1	CPSF1_HUMAN	160.886	1	8	8	22	0.000302	0.0693	SSFLPSYIIDVR	0.997	42.3	25	32.5	2	0	0	1396.75	183	194
Cleavage and polyadenylation specificity factor subunit 1 GN=CPSF1	CPSF1_HUMAN	160.886	1	8	8	22	0.000302	0.0693	LGGARDELGGR	0.993	25.8	25	12	2	0	0	1100.58	714	724
Cleavage and polyadenylation specificity factor subunit 1 GN=CPSF1	CPSF1_HUMAN	160.886	1	8	8	22	0.000302	0.0693	VLVDSSFGQPTTQGEAR	0.997	76.8	25	76.6	6	0	0	1791.89	817	833
Cleavage and polyadenylation specificity factor subunit 1 GN=CPSF1	CPSF1_HUMAN	160.886	1	8	8	22	0.000302	0.0693	EVLLVALGSR	0.997	55.6	25	55.6	4	0	0	1056.64	848	857
Cleavage and polyadenylation specificity factor subunit 1 GN=CPSF1	CPSF1_HUMAN	160.886	1	8	8	22	0.000302	0.0693	VYAVATSTNTPCAR	0.997	56.7	25	56.5	4	0	0	1510.73	1033	1046
Cleavage and polyadenylation specificity factor subunit 1 GN=CPSF1	CPSF1_HUMAN	160.886	1	8	8	22	0.000302	0.0693	NVLDGELLNR	0.99	29	25	25.9	2	0	0	1142.62	1397	1406
Cleavage and polyadenylation specificity factor subunit 2 GN=CPSF2	CPSF2_HUMAN	88.4895	0.998	2	2	3	4.12e-05	0.0448	LGLNCAIYATIPVYK	0.955	27.8	25	27.8	1	0	0	1695.91	78	92
Cleavage and polyadenylation specificity factor subunit 2 GN=CPSF2	CPSF2_HUMAN	88.4895	0.998	2	2	3	4.12e-05	0.0448	QLIIVHGPPEASQDLAECCR	0.997	36.3	25	36.3	0	2	0	2293.11	560	579
Cleavage and polyadenylation specificity factor subunit 5 GN=NUDT21	CPSF5_HUMAN	26.2281	1	2	2	4	5.49e-05	0.128	GVTQFGNKYIQQTKPLTLER	0.997	37.2	25	37.2	0	2	0	2321.26	16	35
Cleavage and polyadenylation specificity factor subunit 5 GN=NUDT21	CPSF5_HUMAN	26.2281	1	2	2	4	5.49e-05	0.128	LFLVQLQEK	0.997	45.4	25	29.2	2	0	0	1117.66	174	182
Cleavage and polyadenylation specificity factor subunit 6 GN=CPSF6	CPSF6_HUMAN	59.211	1	10	12	16	0.00022	0.198	ANGQSKGFALVGVGSEASSK	0.946	13.9	25	13.9	0	1	0	1893.97	119	138
Cleavage and polyadenylation specificity factor subunit 6 GN=CPSF6	CPSF6_HUMAN	59.211	1	10	12	16	0.00022	0.198	GFALVGVGSEASSK	0.997	105	25	94.6	2	0	0	1308.68	125	138
Cleavage and polyadenylation specificity factor subunit 6 GN=CPSF6	CPSF6_HUMAN	59.211	1	10	12	16	0.00022	0.198	GFALVGVGSEASSKK	0.997	65.8	25	51.2	1	0	0	1436.77	125	139
Cleavage and polyadenylation specificity factor subunit 6 GN=CPSF6	CPSF6_HUMAN	59.211	1	10	12	16	0.00022	0.198	RELHGQNPVVTPCNK	0.992	20.5	25	20.5	0	1	0	1748.89	147	161
Cleavage and polyadenylation specificity factor subunit 6 GN=CPSF6	CPSF6_HUMAN	59.211	1	10	12	16	0.00022	0.198	QFLSQFEMQSR	0.997	51.9	25	44.2	2	0	0	1400.66	162	172
Cleavage and polyadenylation specificity factor subunit 6 GN=CPSF6	CPSF6_HUMAN	59.211	1	10	12	16	0.00022	0.198	TTQSGQMSGEGKAGPPGGSSR	0.997	31.2	25	31.2	0	2	0	1976.91	174	194
Cleavage and polyadenylation specificity factor subunit 6 GN=CPSF6	CPSF6_HUMAN	59.211	1	10	12	16	0.00022	0.198	TPLSEAEFEEIMNR	0.997	50.1	25	50.1	1	0	0	1665.78	407	420
Cleavage and polyadenylation specificity factor subunit 6 GN=CPSF6	CPSF6_HUMAN	59.211	1	10	12	16	0.00022	0.198	TPLSEAEFEEIMNRNR	0.986	17.4	25	17.4	0	1	0	1951.92	407	422
Cleavage and polyadenylation specificity factor subunit 6 GN=CPSF6	CPSF6_HUMAN	59.211	1	10	12	16	0.00022	0.198	AISSSAISR	0.997	40.3	25	25.3	2	0	0	891.489	423	431
Cleavage and polyadenylation specificity factor subunit 6 GN=CPSF6	CPSF6_HUMAN	59.211	1	10	12	16	0.00022	0.198	VLISSLQDCLHGIESK	0.997	54	25	54	2	1	0	1798.94	468	483
Crk-like protein GN=CRKL	CRKL_HUMAN	33.7773	0.998	2	3	4	5.49e-05	0.0957	DSSTCPGDYVLSVSENSR	0.997	42	25	36.3	2	0	0	1972.86	40	57
Crk-like protein GN=CRKL	CRKL_HUMAN	33.7773	0.998	2	3	4	5.49e-05	0.0957	VGMIPVPYVEK	0.992	25.3	25	22.8	2	0	0	1247.67	170	180
Casein kinase II subunit alpha' GN=CSNK2A2	CSK22_HUMAN	41.2145	1	2	2	4	5.49e-05	0.0314	ARVYAEVNSLR	0.997	34.7	25	34.7	2	0	0	1277.7	10	20
Casein kinase II subunit alpha' GN=CSNK2A2	CSK22_HUMAN	41.2145	1	2	2	4	5.49e-05	0.0314	VYAEVNSLR	0.997	43.8	25	28.4	2	0	0	1050.56	12	20
C-terminal-binding protein 1 GN=CTBP1	CTBP1_HUMAN	47.5354	1	2	2	5	6.87e-05	0.0432	IGSGFDNIDIK	0.994	29	25	20.6	1	0	0	1178.61	98	108
C-terminal-binding protein 1 GN=CTBP1	CTBP1_HUMAN	47.5354	1	2	2	5	6.87e-05	0.0432	VGQAVALR	0.997	56.9	25	39.2	4	0	0	813.494	185	192
Catenin delta-1 GN=CTNND1	CTND1_HUMAN	108.172	1	4	5	10	0.000137	0.0517	GSLASLDSLRK	0.98	25	25	24.8	1	0	0	1146.65	345	355
Catenin delta-1 GN=CTNND1	CTND1_HUMAN	108.172	1	4	5	10	0.000137	0.0517	GYELLFQPEVVR	0.997	50.2	25	41.3	3	0	0	1449.77	655	666
Catenin delta-1 GN=CTNND1	CTND1_HUMAN	108.172	1	4	5	10	0.000137	0.0517	ALSAIADLLTNEHER	0.997	95.7	25	95.7	3	1	0	1652.86	711	725
Catenin delta-1 GN=CTNND1	CTND1_HUMAN	108.172	1	4	5	10	0.000137	0.0517	SDFQVNLNNASR	0.997	67.5	25	62.5	2	0	0	1364.66	847	858
Cytoplasmic tRNA 2-thiolation protein 1 GN=CTU1	CTU1_HUMAN	36.4502	0.999	2	2	3	4.12e-05	0.0833	GGGLGSPGEGGALPR	0.997	42.3	25	42.3	2	0	0	1281.65	195	209
Cytoplasmic tRNA 2-thiolation protein 1 GN=CTU1	CTU1_HUMAN	36.4502	0.999	2	2	3	4.12e-05	0.0833	ALCQACALLDGLNR	0.997	48	25	43.9	1	0	0	1574.78	297	310
Cullin-1 GN=CUL1	CUL1_HUMAN	89.6814	0.999	2	2	2	2.75e-05	0.0219	FINNNAVTK	0.996	28.6	25	15.6	1	0	0	1020.55	402	410
Cullin-1 GN=CUL1	CUL1_HUMAN	89.6814	0.999	2	2	2	2.75e-05	0.0219	FTAFYASR	0.954	21.9	25	21.9	1	0	0	962.473	566	573
Cytoplasmic FMR1-interacting protein 1 GN=CYFIP1	CYFP1_HUMAN	145.187	1	6	6	10	0.000137	0.0559	YSNSEVVTGSGR	0.997	30.8	25	30.6	1	0	0	1255.59	366	377
Cytoplasmic FMR1-interacting protein 1 GN=CYFIP1	CYFP1_HUMAN	145.187	1	6	6	10	0.000137	0.0559	SGFDIKVPR	0.997	47	25	39.5	2	0	0	1018.57	541	549
Cytoplasmic FMR1-interacting protein 1 GN=CYFIP1	CYFP1_HUMAN	145.187	1	6	6	10	0.000137	0.0559	TVLPFSQEFQR	0.977	22.8	25	14.4	1	0	0	1351.7	867	877
Cytoplasmic FMR1-interacting protein 1 GN=CYFIP1	CYFP1_HUMAN	145.187	1	6	6	10	0.000137	0.0559	ALNLAYSSIYGSYR	0.996	33.2	25	24.5	1	0	0	1577.8	893	906
Cytoplasmic FMR1-interacting protein 1 GN=CYFIP1	CYFP1_HUMAN	145.187	1	6	6	10	0.000137	0.0559	LGTPQQIAIAR	0.997	60.5	25	54.4	4	0	0	1167.68	1066	1076
Cytoplasmic FMR1-interacting protein 1 GN=CYFIP1	CYFP1_HUMAN	145.187	1	6	6	10	0.000137	0.0559	CFQPPIHQSLASS	0.955	20.4	25	16.8	1	0	0	1471.7	1241	1253
Cytoplasmic FMR1-interacting protein 2 GN=CYFIP2	CYFP2_HUMAN	148.403	1	3	3	5	6.87e-05	0.0344	GGFDIKVPR	0.997	42.3	25	30.2	2	0	0	988.558	540	548
Cytoplasmic FMR1-interacting protein 2 GN=CYFIP2	CYFP2_HUMAN	148.403	1	3	3	5	6.87e-05	0.0344	TAIPFTQEPQR	0.964	20	25	18.9	2	0	0	1287.67	891	901
Cytoplasmic FMR1-interacting protein 2 GN=CYFIP2	CYFP2_HUMAN	148.403	1	3	3	5	6.87e-05	0.0344	LGTPQQIAIAR	0.997	60.5	25	54.4	4	0	0	1167.68	1090	1100
Cytoplasmic FMR1-interacting protein 2 GN=CYFIP2	CYFP2_HUMAN	148.403	1	3	3	5	6.87e-05	0.0344	SVETDSSTVEHVR	0.997	53.8	25	40.2	1	0	0	1445.69	1252	1264
Protein Daple GN=CCDC88C	DAPLE_HUMAN	228.235	1	9	9	18	0.000247	0.0513	KEEFIER	0.997	32.8	25	26.3	2	0	0	950.494	137	143
Protein Daple GN=CCDC88C	DAPLE_HUMAN	228.235	1	9	9	18	0.000247	0.0513	VKQENIQLAADAR	0.997	79.3	25	69.7	2	0	0	1455.79	294	306
Protein Daple GN=CCDC88C	DAPLE_HUMAN	228.235	1	9	9	18	0.000247	0.0513	AMLEEQLTAAR	0.997	54.8	25	53.1	2	0	0	1232.63	364	374
Protein Daple GN=CCDC88C	DAPLE_HUMAN	228.235	1	9	9	18	0.000247	0.0513	ALDKELAR	0.997	42.1	25	27.8	2	0	0	915.526	871	878
Protein Daple GN=CCDC88C	DAPLE_HUMAN	228.235	1	9	9	18	0.000247	0.0513	QSAEYEALIR	0.966	20.2	25	13.6	1	0	0	1179.6	1181	1190
Protein Daple GN=CCDC88C	DAPLE_HUMAN	228.235	1	9	9	18	0.000247	0.0513	VLTTEREALQQEQR	0.971	22.8	25	19.7	1	0	0	1700.89	1229	1242
Protein Daple GN=CCDC88C	DAPLE_HUMAN	228.235	1	9	9	18	0.000247	0.0513	TCSTSATTTAPSNSTPIAR	0.997	58	25	58	2	0	0	1923.91	1519	1537
Protein Daple GN=CCDC88C	DAPLE_HUMAN	228.235	1	9	9	18	0.000247	0.0513	AFSLASADLLR	0.997	51.7	25	46.7	2	0	0	1163.64	1804	1814
Protein Daple GN=CCDC88C	DAPLE_HUMAN	228.235	1	9	9	18	0.000247	0.0513	SGEVATITPVR	0.997	51.5	25	44	4	0	0	1129.62	1947	1957
Cytoplasmic dynein 1 light intermediate chain 1 GN=DYNC1LI1	DC1L1_HUMAN	56.5802	1	2	2	5	6.87e-05	0.0918	SVSSNVASVSPIPAGSK	0.997	58.5	25	48.5	4	0	0	1586.84	412	428
Cytoplasmic dynein 1 light intermediate chain 1 GN=DYNC1LI1	DC1L1_HUMAN	56.5802	1	2	2	5	6.87e-05	0.0918	TGSPGGPGVSGGSPAGGAGGGSSGLPPSTKK	0.997	35.2	25	35.1	0	1	0	2523.24	456	486
Dermcidin GN=DCD	DCD_HUMAN	11.2841	1	5	6	22	0.000302	0.464	ENAGEDPGLAR	0.997	82.3	25	77.1	12	0	0	1128.53	43	53
Dermcidin GN=DCD	DCD_HUMAN	11.2841	1	5	6	22	0.000302	0.464	SSLLEKGLDGAK	0.997	56.3	25	47.1	2	0	0	1217.67	63	74
Dermcidin GN=DCD	DCD_HUMAN	11.2841	1	5	6	22	0.000302	0.464	LGKDAVEDLESVGK	0.997	47.5	25	42.4	2	2	0	1459.76	83	96
Dermcidin GN=DCD	DCD_HUMAN	11.2841	1	5	6	22	0.000302	0.464	DAVEDLESVGK	0.997	53.8	25	28.9	2	0	0	1161.56	86	96
Dermcidin GN=DCD	DCD_HUMAN	11.2841	1	5	6	22	0.000302	0.464	GAVHDVKDVLDSVL	0.997	38.8	25	38.8	2	0	0	1466.79	97	110
Dynactin subunit 1 GN=DCTN1	DCTN1_HUMAN	141.698	1	3	4	6	8.24e-05	0.0344	ASLASLPPLHVAK	0.997	23.1	25	23.1	1	2	0	1303.77	1121	1133
Dynactin subunit 1 GN=DCTN1	DCTN1_HUMAN	141.698	1	3	4	6	8.24e-05	0.0344	LSHEGPGSELPAGALYR	0.997	22.6	25	12.1	0	2	0	1753.89	1134	1150
Dynactin subunit 1 GN=DCTN1	DCTN1_HUMAN	141.698	1	3	4	6	8.24e-05	0.0344	SPSAQLMEQVAQLK	0.997	51.6	25	49.4	1	0	0	1529.8	1180	1193
ATP-dependent RNA helicase DDX19A GN=DDX19A	DD19A_HUMAN	53.9277	0.998	2	2	4	5.49e-05	0.0732	SNLVDNTNQVEVLQRDPNSPLYSVK	0.997	49.1	25	49.1	0	2	0	2829.44	68	92
ATP-dependent RNA helicase DDX19A GN=DDX19A	DD19A_HUMAN	53.9277	0.998	2	2	4	5.49e-05	0.0732	VLVTTNVCAR	0.994	28	25	28	2	0	0	1132.61	386	395
ATP-dependent RNA helicase DDX1 GN=DDX1	DDX1_HUMAN	82.4332	0.998	2	2	4	5.49e-05	0.0311	SQHSGNAQVTQTK	0.997	43.3	25	37.6	2	0	0	1385.68	269	281
ATP-dependent RNA helicase DDX1 GN=DDX1	DDX1_HUMAN	82.4332	0.998	2	2	4	5.49e-05	0.0311	FLICTDVAAR	0.997	49.7	25	39.9	2	0	0	1165.6	568	577
Probable ATP-dependent RNA helicase DDX17 GN=DDX17	DDX17_HUMAN	80.274	1	12	16	45	0.000618	0.259	APLPDLYPFGTMR	0.997	30.3	25	30.3	2	0	0	1477.75	69	81
Probable ATP-dependent RNA helicase DDX17 GN=DDX17	DDX17_HUMAN	80.274	1	12	16	45	0.000618	0.259	NFYVEHPEVAR	0.997	48.7	25	38.9	3	2	0	1360.66	133	143
Probable ATP-dependent RNA helicase DDX17 GN=DDX17	DDX17_HUMAN	80.274	1	12	16	45	0.000618	0.259	LTPYEVDELRR	0.977	22.8	25	4.84	2	0	0	1390.73	144	154
Probable ATP-dependent RNA helicase DDX17 GN=DDX17	DDX17_HUMAN	80.274	1	12	16	45	0.000618	0.259	DMVGIAQTGSGK	0.997	39.7	25	36.6	2	0	0	1163.57	210	221
Probable ATP-dependent RNA helicase DDX17 GN=DDX17	DDX17_HUMAN	80.274	1	12	16	45	0.000618	0.259	GDGPICLVLAPTR	0.997	48.4	25	44.2	2	0	0	1368.73	242	254
Probable ATP-dependent RNA helicase DDX17 GN=DDX17	DDX17_HUMAN	80.274	1	12	16	45	0.000618	0.259	ELAQQVQQVADDYGK	0.997	71.2	25	71.2	2	0	0	1691.82	255	269
Probable ATP-dependent RNA helicase DDX17 GN=DDX17	DDX17_HUMAN	80.274	1	12	16	45	0.000618	0.259	ELAQQVQQVADDYGKCSR	0.993	22	25	22	0	1	0	2094.99	255	272
Probable ATP-dependent RNA helicase DDX17 GN=DDX17	DDX17_HUMAN	80.274	1	12	16	45	0.000618	0.259	LKSTCIYGGAPK	0.997	68.2	25	61.8	7	0	0	1294.68	273	284
Probable ATP-dependent RNA helicase DDX17 GN=DDX17	DDX17_HUMAN	80.274	1	12	16	45	0.000618	0.259	STCIYGGAPK	0.997	57.5	25	50.1	6	0	0	1053.5	275	284
Probable ATP-dependent RNA helicase DDX17 GN=DDX17	DDX17_HUMAN	80.274	1	12	16	45	0.000618	0.259	GPQIRDLER	0.978	22.9	25	5.51	1	0	0	1083.59	285	293
Probable ATP-dependent RNA helicase DDX17 GN=DDX17	DDX17_HUMAN	80.274	1	12	16	45	0.000618	0.259	GVEICIATPGR	0.997	52.8	25	18.4	4	0	0	1172.61	294	304
Probable ATP-dependent RNA helicase DDX17 GN=DDX17	DDX17_HUMAN	80.274	1	12	16	45	0.000618	0.259	SGKAPILIATDVASR	0.997	63.1	25	63.1	4	2	0	1498.86	466	480
Probable ATP-dependent RNA helicase DDX17 GN=DDX17	DDX17_HUMAN	80.274	1	12	16	45	0.000618	0.259	APILIATDVASR	0.997	77.9	25	77.9	7	0	0	1226.71	469	480
Probable ATP-dependent RNA helicase DDX17 GN=DDX17	DDX17_HUMAN	80.274	1	12	16	45	0.000618	0.259	STNKGTAYTFFTPGNLK	0.997	42.7	25	42.2	4	4	0	1846.93	512	528
Probable ATP-dependent RNA helicase DDX17 GN=DDX17	DDX17_HUMAN	80.274	1	12	16	45	0.000618	0.259	ELIKVLEEANQAINPK	0.997	98.5	25	98.5	4	3	0	1809.01	532	547
Probable ATP-dependent RNA helicase DDX17 GN=DDX17	DDX17_HUMAN	80.274	1	12	16	45	0.000618	0.259	VLEEANQAINPK	0.997	68.1	25	59.6	4	0	0	1325.71	536	547
Probable ATP-dependent RNA helicase DDX17 GN=DDX17	DDX17_HUMAN	80.274	1	12	16	45	0.000618	0.259	LMQLVDHRGGGGGGGGR	0.997	23.8	25	23.5	0	2	0	1623.81	548	564
Probable ATP-dependent RNA helicase DDX17 GN=DDX17	DDX17_HUMAN	80.274	1	12	16	45	0.000618	0.259	SSQSSSQQFSGIGR	0.997	104	25	96.9	4	0	0	1455.68	671	684
ATP-dependent RNA helicase DDX18 GN=DDX18	DDX18_HUMAN	75.4097	1	7	9	18	0.000247	0.13	SIRPLLEGRDLLAAAK	0.997	26	25	26	0	2	0	1723.02	209	224
ATP-dependent RNA helicase DDX18 GN=DDX18	DDX18_HUMAN	75.4097	1	7	9	18	0.000247	0.13	NGTGVLILSPTR	0.997	39	25	28	2	0	0	1227.71	250	261
ATP-dependent RNA helicase DDX18 GN=DDX18	DDX18_HUMAN	75.4097	1	7	9	18	0.000247	0.13	SAEAQKLGNGINIIVATPGR	0.997	34.3	25	34.3	0	2	0	2009.11	292	311
ATP-dependent RNA helicase DDX18 GN=DDX18	DDX18_HUMAN	75.4097	1	7	9	18	0.000247	0.13	LGNGINIIVATPGR	0.997	66.5	25	66.5	2	0	0	1394.81	298	311
ATP-dependent RNA helicase DDX18 GN=DDX18	DDX18_HUMAN	75.4097	1	7	9	18	0.000247	0.13	QTMLFSATQTR	0.997	81.6	25	63.8	4	0	0	1283.64	359	369
ATP-dependent RNA helicase DDX18 GN=DDX18	DDX18_HUMAN	75.4097	1	7	9	18	0.000247	0.13	KVEDLAR	0.995	27.9	25	9.07	2	0	0	830.473	370	376
ATP-dependent RNA helicase DDX18 GN=DDX18	DDX18_HUMAN	75.4097	1	7	9	18	0.000247	0.13	ISDIQSQLEK	0.997	47.9	25	0	1	0	0	1160.62	558	567
ATP-dependent RNA helicase DDX18 GN=DDX18	DDX18_HUMAN	75.4097	1	7	9	18	0.000247	0.13	SAQEAYKSYIR	0.997	46.8	25	46.8	2	2	0	1315.66	578	588
Probable ATP-dependent RNA helicase DDX20 GN=DDX20	DDX20_HUMAN	92.2421	1	3	3	5	6.87e-05	0.0352	TAQDLSSPR	0.997	52.2	25	34.6	2	0	0	974.49	42	50
Probable ATP-dependent RNA helicase DDX20 GN=DDX20	DDX20_HUMAN	92.2421	1	3	3	5	6.87e-05	0.0352	VLISTDLTSR	0.997	38.7	25	38.7	1	0	0	1104.63	362	371
Probable ATP-dependent RNA helicase DDX20 GN=DDX20	DDX20_HUMAN	92.2421	1	3	3	5	6.87e-05	0.0352	NNSVSGLSVK	0.997	44.7	25	37.3	2	0	0	1004.54	498	507
Nucleolar RNA helicase 2 GN=DDX21	DDX21_HUMAN	87.346	1	23	25	63	0.000865	0.326	KAEPSEVDMNSPK	0.997	39	25	39	2	0	0	1447.67	61	73
Nucleolar RNA helicase 2 GN=DDX21	DDX21_HUMAN	87.346	1	23	25	63	0.000865	0.326	VTKNEEPSEEEIDAPKPK	0.997	23	25	23	0	1	0	2040.01	114	131
Nucleolar RNA helicase 2 GN=DDX21	DDX21_HUMAN	87.346	1	23	25	63	0.000865	0.326	EGAFSNFPISEETIK	0.997	36	25	36	4	0	0	1668.81	185	199
Nucleolar RNA helicase 2 GN=DDX21	DDX21_HUMAN	87.346	1	23	25	63	0.000865	0.326	GRGVTFLFPIQAK	0.997	42.1	25	42.1	3	3	0	1433.83	203	215
Nucleolar RNA helicase 2 GN=DDX21	DDX21_HUMAN	87.346	1	23	25	63	0.000865	0.326	GVTFLFPIQAK	0.997	51.3	25	32.4	2	0	0	1220.7	205	215
Nucleolar RNA helicase 2 GN=DDX21	DDX21_HUMAN	87.346	1	23	25	63	0.000865	0.326	TFHHVYSGKDLIAQAR	0.997	28.5	25	28.5	0	3	0	1842.96	216	231
Nucleolar RNA helicase 2 GN=DDX21	DDX21_HUMAN	87.346	1	23	25	63	0.000865	0.326	TGTGKTFSFAIPLIEK	0.997	22.8	25	22.4	0	1	0	1709.95	232	247
Nucleolar RNA helicase 2 GN=DDX21	DDX21_HUMAN	87.346	1	23	25	63	0.000865	0.326	GRAPQVLVLAPTR	0.997	62.9	25	62.9	4	0	0	1377.83	258	270
Nucleolar RNA helicase 2 GN=DDX21	DDX21_HUMAN	87.346	1	23	25	63	0.000865	0.326	APQVLVLAPTR	0.997	53	25	53	6	0	0	1164.71	260	270
Nucleolar RNA helicase 2 GN=DDX21	DDX21_HUMAN	87.346	1	23	25	63	0.000865	0.326	KLSVACFYGGTPYGGQFER	0.997	32.3	25	19.9	0	2	0	2137.02	286	304
Nucleolar RNA helicase 2 GN=DDX21	DDX21_HUMAN	87.346	1	23	25	63	0.000865	0.326	LSVACFYGGTPYGGQFER	0.997	63.4	25	63.4	3	0	0	2008.92	287	304
Nucleolar RNA helicase 2 GN=DDX21	DDX21_HUMAN	87.346	1	23	25	63	0.000865	0.326	MRNGIDILVGTPGR	0.973	18.2	25	18.2	2	1	0	1514.81	305	318
Nucleolar RNA helicase 2 GN=DDX21	DDX21_HUMAN	87.346	1	23	25	63	0.000865	0.326	NGIDILVGTPGR	0.997	78.8	25	73.6	6	0	0	1211.67	307	318
Nucleolar RNA helicase 2 GN=DDX21	DDX21_HUMAN	87.346	1	23	25	63	0.000865	0.326	STYEQVDLIGK	0.997	31.5	25	29.2	1	0	0	1252.64	392	402
Nucleolar RNA helicase 2 GN=DDX21	DDX21_HUMAN	87.346	1	23	25	63	0.000865	0.326	TAITVEHLAIK	0.989	24.9	25	24.9	1	0	0	1195.7	407	417
Nucleolar RNA helicase 2 GN=DDX21	DDX21_HUMAN	87.346	1	23	25	63	0.000865	0.326	AAVIGDVIR	0.997	38	25	27.4	3	0	0	913.547	424	432
Nucleolar RNA helicase 2 GN=DDX21	DDX21_HUMAN	87.346	1	23	25	63	0.000865	0.326	AAVIGDVIRVYSGHQGR	0.997	36.9	25	36.9	0	2	0	1797.97	424	440
Nucleolar RNA helicase 2 GN=DDX21	DDX21_HUMAN	87.346	1	23	25	63	0.000865	0.326	NGSFGVLVATNVAAR	0.997	91.1	25	91.1	5	0	0	1475.8	485	499
Nucleolar RNA helicase 2 GN=DDX21	DDX21_HUMAN	87.346	1	23	25	63	0.000865	0.326	IGVPSATEIIK	0.992	25.7	25	19.4	2	0	0	1127.67	563	573
Nucleolar RNA helicase 2 GN=DDX21	DDX21_HUMAN	87.346	1	23	25	63	0.000865	0.326	LLDSVPPTAISHFKQSAEK	0.971	16.1	25	9.19	0	1	0	2068.11	582	600
Nucleolar RNA helicase 2 GN=DDX21	DDX21_HUMAN	87.346	1	23	25	63	0.000865	0.326	WQLSVATEQPELEGPR	0.997	65.8	25	65.8	2	0	0	1839.92	703	718
Nucleolar RNA helicase 2 GN=DDX21	DDX21_HUMAN	87.346	1	23	25	63	0.000865	0.326	EGYGGFRGQR	0.997	29.5	25	15.6	1	0	0	1126.54	719	728
Nucleolar RNA helicase 2 GN=DDX21	DDX21_HUMAN	87.346	1	23	25	63	0.000865	0.326	SFSKAFGQ	0.997	32.2	25	16.1	2	0	0	871.431	776	783
Probable ATP-dependent RNA helicase DDX23 GN=DDX23	DDX23_HUMAN	95.5869	0.999	2	2	2	2.75e-05	0.0451	QAIPIGLQNRDIIGVAETGSGK	0.997	34.7	25	34.7	0	1	0	2237.23	420	441
Probable ATP-dependent RNA helicase DDX23 GN=DDX23	DDX23_HUMAN	95.5869	0.999	2	2	2	2.75e-05	0.0451	AGAKDILVATDVAGR	0.975	34.3	25	34.3	1	0	0	1456.81	712	726
Probable ATP-dependent RNA helicase DDX27 GN=DDX27	DDX27_HUMAN	89.8381	1	2	2	2	2.75e-05	0.0402	ACIPVGLLGKDICACAATGTGK	0.987	17.2	25	15	0	1	0	2233.11	247	268
Probable ATP-dependent RNA helicase DDX27 GN=DDX27	DDX27_HUMAN	89.8381	1	2	2	2	2.75e-05	0.0402	ALQEFDLALR	0.997	40	25	31.1	1	0	0	1175.64	667	676
Probable ATP-dependent RNA helicase DDX28 GN=DDX28	DDX28_HUMAN	59.5822	1	4	4	8	0.00011	0.0981	GSFADLGLEPR	0.997	45.5	25	45.5	2	0	0	1161.59	126	136
Probable ATP-dependent RNA helicase DDX28 GN=DDX28	DDX28_HUMAN	59.5822	1	4	4	8	0.00011	0.0981	LLGQPSLDSLPIPAPR	0.997	48.1	25	48.1	2	0	0	1673.96	190	205
Probable ATP-dependent RNA helicase DDX28 GN=DDX28	DDX28_HUMAN	59.5822	1	4	4	8	0.00011	0.0981	VGIFQSFQK	0.997	41.4	25	40.5	2	0	0	1053.57	437	445
Probable ATP-dependent RNA helicase DDX28 GN=DDX28	DDX28_HUMAN	59.5822	1	4	4	8	0.00011	0.0981	SLPGLASSVKEPLPQAT	0.997	54.3	25	54.3	2	0	0	1694.93	524	540
Probable ATP-dependent RNA helicase DDX31 GN=DDX31	DDX31_HUMAN	94.0883	1	3	3	3	4.12e-05	0.0411	QSIPVLLEGRDALVR	0.962	14.3	25	14.3	0	1	0	1665.96	260	274
Probable ATP-dependent RNA helicase DDX31 GN=DDX31	DDX31_HUMAN	94.0883	1	3	3	3	4.12e-05	0.0411	LVCLAAFILQK	0.997	37.4	25	31.8	1	0	0	1275.75	494	504
Probable ATP-dependent RNA helicase DDX31 GN=DDX31	DDX31_HUMAN	94.0883	1	3	3	3	4.12e-05	0.0411	SLHLGHVAK	0.96	19.6	25	13.8	1	0	0	961.558	737	745
ATP-dependent RNA helicase DDX3X GN=DDX3X	DDX3X_HUMAN	73.2458	1	20	24	54	0.000742	0.281	SSFFSDRGSGSR	0.992	25.6	25	25.6	2	0	0	1289.59	82	93
ATP-dependent RNA helicase DDX3X GN=DDX3X	DDX3X_HUMAN	73.2458	1	20	24	54	0.000742	0.281	YTRPTPVQK	0.97	21.1	25	13.3	2	0	0	1089.61	200	208
ATP-dependent RNA helicase DDX3X GN=DDX3X	DDX3X_HUMAN	73.2458	1	20	24	54	0.000742	0.281	DLMACAQTGSGK	0.997	60	25	52.5	4	0	0	1238.55	219	230
ATP-dependent RNA helicase DDX3X GN=DDX3X	DDX3X_HUMAN	73.2458	1	20	24	54	0.000742	0.281	KQYPISLVLAPTR	0.997	49.8	25	47.5	1	0	0	1485.88	264	276
ATP-dependent RNA helicase DDX3X GN=DDX3X	DDX3X_HUMAN	73.2458	1	20	24	54	0.000742	0.281	QYPISLVLAPTR	0.997	41.4	25	34.6	2	0	0	1357.78	265	276
ATP-dependent RNA helicase DDX3X GN=DDX3X	DDX3X_HUMAN	73.2458	1	20	24	54	0.000742	0.281	ELAVQIYEEAR	0.997	51.3	25	46.6	2	0	0	1320.68	277	287
ATP-dependent RNA helicase DDX3X GN=DDX3X	DDX3X_HUMAN	73.2458	1	20	24	54	0.000742	0.281	ELAVQIYEEARK	0.997	72.1	25	65	2	1	0	1448.77	277	288
ATP-dependent RNA helicase DDX3X GN=DDX3X	DDX3X_HUMAN	73.2458	1	20	24	54	0.000742	0.281	GCHLLVATPGR	0.997	37.7	25	37.7	1	0	0	1180.63	316	326
ATP-dependent RNA helicase DDX3X GN=DDX3X	DDX3X_HUMAN	73.2458	1	20	24	54	0.000742	0.281	IVEQDTMPPKGVR	0.994	32.8	25	27.1	1	0	0	1485.77	364	376
ATP-dependent RNA helicase DDX3X GN=DDX3X	DDX3X_HUMAN	73.2458	1	20	24	54	0.000742	0.281	HTMMFSATFPK	0.946	22.5	25	22.5	1	0	0	1297.61	377	387
ATP-dependent RNA helicase DDX3X GN=DDX3X	DDX3X_HUMAN	73.2458	1	20	24	54	0.000742	0.281	VGSTSENITQK	0.997	70	25	62.1	4	0	0	1163.59	408	418
ATP-dependent RNA helicase DDX3X GN=DDX3X	DDX3X_HUMAN	73.2458	1	20	24	54	0.000742	0.281	DREEALHQFR	0.993	20	25	16.7	0	1	0	1300.64	479	488
ATP-dependent RNA helicase DDX3X GN=DDX3X	DDX3X_HUMAN	73.2458	1	20	24	54	0.000742	0.281	SGKSPILVATAVAAR	0.997	62.2	25	62.2	4	4	0	1440.85	489	503
ATP-dependent RNA helicase DDX3X GN=DDX3X	DDX3X_HUMAN	73.2458	1	20	24	54	0.000742	0.281	SPILVATAVAAR	0.997	92.4	25	85	6	0	0	1168.7	492	503
ATP-dependent RNA helicase DDX3X GN=DDX3X	DDX3X_HUMAN	73.2458	1	20	24	54	0.000742	0.281	GLDISNVK	0.992	26.3	25	7.64	1	0	0	845.473	504	511
ATP-dependent RNA helicase DDX3X GN=DDX3X	DDX3X_HUMAN	73.2458	1	20	24	54	0.000742	0.281	VGNLGLATSFFNER	0.997	66.4	25	66.4	6	0	0	1524.78	535	548
ATP-dependent RNA helicase DDX3X GN=DDX3X	DDX3X_HUMAN	73.2458	1	20	24	54	0.000742	0.281	DLLDLLVEAK	0.991	24.8	25	24.8	1	0	0	1128.65	555	564
ATP-dependent RNA helicase DDX3X GN=DDX3X	DDX3X_HUMAN	73.2458	1	20	24	54	0.000742	0.281	FSGGFGARDYR	0.968	14.8	25	11.1	0	2	0	1232.58	593	603
ATP-dependent RNA helicase DDX3X GN=DDX3X	DDX3X_HUMAN	73.2458	1	20	24	54	0.000742	0.281	DYRQSSGASSSSFSSSR	0.997	48.5	25	47.5	2	2	0	1795.78	601	617
ATP-dependent RNA helicase DDX3X GN=DDX3X	DDX3X_HUMAN	73.2458	1	20	24	54	0.000742	0.281	QSSGASSSSFSSSR	0.997	72.2	25	70.8	2	0	0	1361.59	604	617
Probable ATP-dependent RNA helicase DDX41 GN=DDX41	DDX41_HUMAN	69.8397	0.998	2	2	3	4.12e-05	0.0386	LLQEDSSPLLR	0.997	36	25	36	2	0	0	1270.7	283	293
Probable ATP-dependent RNA helicase DDX41 GN=DDX41	DDX41_HUMAN	69.8397	0.998	2	2	3	4.12e-05	0.0386	SALVKPVTINVGR	0.99	18.4	25	18.4	0	1	0	1353.82	388	400
Probable ATP-dependent RNA helicase DDX5 GN=DDX5	DDX5_HUMAN	69.1497	1	20	23	65	0.000893	0.295	DRGFGAPR	0.981	24.3	25	13.9	2	0	0	875.448	13	20
Probable ATP-dependent RNA helicase DDX5 GN=DDX5	DDX5_HUMAN	69.1497	1	20	23	65	0.000893	0.295	KFGNPGEK	0.988	24.6	25	7.58	2	0	0	876.457	33	40
Probable ATP-dependent RNA helicase DDX5 GN=DDX5	DDX5_HUMAN	69.1497	1	20	23	65	0.000893	0.295	NFYQEHPDLARR	0.997	23	25	19.7	1	2	0	1545.76	57	68
Probable ATP-dependent RNA helicase DDX5 GN=DDX5	DDX5_HUMAN	69.1497	1	20	23	65	0.000893	0.295	TAQEVETYR	0.997	33.5	25	28.1	2	0	0	1096.53	69	77
Probable ATP-dependent RNA helicase DDX5 GN=DDX5	DDX5_HUMAN	69.1497	1	20	23	65	0.000893	0.295	TAQEVETYRR	0.997	23.2	25	23.2	2	1	0	1252.63	69	78
Probable ATP-dependent RNA helicase DDX5 GN=DDX5	DDX5_HUMAN	69.1497	1	20	23	65	0.000893	0.295	SKEITVR	0.98	23.2	25	13.8	1	0	0	832.489	79	85
Probable ATP-dependent RNA helicase DDX5 GN=DDX5	DDX5_HUMAN	69.1497	1	20	23	65	0.000893	0.295	GDGPICLVLAPTR	0.997	48.4	25	44.2	2	0	0	1368.73	165	177
Probable ATP-dependent RNA helicase DDX5 GN=DDX5	DDX5_HUMAN	69.1497	1	20	23	65	0.000893	0.295	ELAQQVQQVAAEYCR	0.997	84.7	25	84.7	4	0	0	1792.86	178	192
Probable ATP-dependent RNA helicase DDX5 GN=DDX5	DDX5_HUMAN	69.1497	1	20	23	65	0.000893	0.295	LKSTCIYGGAPK	0.997	68.2	25	61.8	7	0	0	1294.68	196	207
Probable ATP-dependent RNA helicase DDX5 GN=DDX5	DDX5_HUMAN	69.1497	1	20	23	65	0.000893	0.295	STCIYGGAPK	0.997	57.5	25	50.1	6	0	0	1053.5	198	207
Probable ATP-dependent RNA helicase DDX5 GN=DDX5	DDX5_HUMAN	69.1497	1	20	23	65	0.000893	0.295	GPQIRDLER	0.978	22.9	25	5.51	1	0	0	1083.59	208	216
Probable ATP-dependent RNA helicase DDX5 GN=DDX5	DDX5_HUMAN	69.1497	1	20	23	65	0.000893	0.295	GVEICIATPGR	0.997	52.8	25	18.4	4	0	0	1172.61	217	227
Probable ATP-dependent RNA helicase DDX5 GN=DDX5	DDX5_HUMAN	69.1497	1	20	23	65	0.000893	0.295	LMEEIMSEKENK	0.956	21.1	25	9.64	1	0	0	1480.7	332	343
Probable ATP-dependent RNA helicase DDX5 GN=DDX5	DDX5_HUMAN	69.1497	1	20	23	65	0.000893	0.295	RCDELTR	0.997	44.7	25	30.8	2	0	0	949.452	353	359
Probable ATP-dependent RNA helicase DDX5 GN=DDX5	DDX5_HUMAN	69.1497	1	20	23	65	0.000893	0.295	APILIATDVASR	0.997	77.9	25	77.9	7	0	0	1226.71	392	403
Probable ATP-dependent RNA helicase DDX5 GN=DDX5	DDX5_HUMAN	69.1497	1	20	23	65	0.000893	0.295	TGTAYTFFTPNNIK	0.997	55.8	25	50.5	3	0	0	1574.79	438	451
Probable ATP-dependent RNA helicase DDX5 GN=DDX5	DDX5_HUMAN	69.1497	1	20	23	65	0.000893	0.295	QVSDLISVLR	0.997	59	25	46	3	0	0	1129.66	452	461
Probable ATP-dependent RNA helicase DDX5 GN=DDX5	DDX5_HUMAN	69.1497	1	20	23	65	0.000893	0.295	EANQAINPK	0.997	37.9	25	18.5	3	0	0	984.511	462	470
Probable ATP-dependent RNA helicase DDX5 GN=DDX5	DDX5_HUMAN	69.1497	1	20	23	65	0.000893	0.295	LLQLVEDR	0.997	53.6	25	37.8	2	0	0	985.568	471	478
Probable ATP-dependent RNA helicase DDX5 GN=DDX5	DDX5_HUMAN	69.1497	1	20	23	65	0.000893	0.295	LLQLVEDRGSGR	0.997	57.7	25	48.6	5	2	0	1342.74	471	482
ATP-dependent RNA helicase DDX50 GN=DDX50	DDX50_HUMAN	82.5667	1	12	14	26	0.000357	0.206	EGAFSNFPISEETIK	0.997	36	25	36	4	0	0	1668.81	136	150
ATP-dependent RNA helicase DDX50 GN=DDX50	DDX50_HUMAN	82.5667	1	12	14	26	0.000357	0.206	GVTYLFPIQVK	0.997	59.5	25	42.9	2	0	0	1264.73	156	166
ATP-dependent RNA helicase DDX50 GN=DDX50	DDX50_HUMAN	82.5667	1	12	14	26	0.000357	0.206	TFGPVYEGKDLIAQAR	0.997	68.1	25	68.1	2	2	0	1764.93	167	182
ATP-dependent RNA helicase DDX50 GN=DDX50	DDX50_HUMAN	82.5667	1	12	14	26	0.000357	0.206	TGTGKTFSFAIPLIER	0.997	34.7	25	34.7	1	2	0	1737.95	183	198
ATP-dependent RNA helicase DDX50 GN=DDX50	DDX50_HUMAN	82.5667	1	12	14	26	0.000357	0.206	TFSFAIPLIER	0.997	38	25	32.8	2	0	0	1293.72	188	198
ATP-dependent RNA helicase DDX50 GN=DDX50	DDX50_HUMAN	82.5667	1	12	14	26	0.000357	0.206	VLVLAPTR	0.997	37.4	25	37.4	2	0	0	868.562	214	221
ATP-dependent RNA helicase DDX50 GN=DDX50	DDX50_HUMAN	82.5667	1	12	14	26	0.000357	0.206	NGIDILVGTPGR	0.997	78.8	25	73.6	6	0	0	1211.67	258	269
ATP-dependent RNA helicase DDX50 GN=DDX50	DDX50_HUMAN	82.5667	1	12	14	26	0.000357	0.206	SRYEQVDLVGK	0.996	28.9	25	21	1	0	0	1293.68	343	353
ATP-dependent RNA helicase DDX50 GN=DDX50	DDX50_HUMAN	82.5667	1	12	14	26	0.000357	0.206	VLVATNVAAR	0.997	43.8	25	37.5	2	0	0	1013.61	441	450
ATP-dependent RNA helicase DDX50 GN=DDX50	DDX50_HUMAN	82.5667	1	12	14	26	0.000357	0.206	TGICICFYQPR	0.997	44.7	25	44.7	2	0	0	1414.66	485	495
ATP-dependent RNA helicase DDX50 GN=DDX50	DDX50_HUMAN	82.5667	1	12	14	26	0.000357	0.206	VGVPSTMDLVK	0.997	32.1	25	28.7	2	0	0	1145.62	514	524
ATP-dependent RNA helicase DDX50 GN=DDX50	DDX50_HUMAN	82.5667	1	12	14	26	0.000357	0.206	SLASVSYAAVDFFRPSAQR	0.997	46.8	25	46.6	0	2	0	2072.06	533	551
ATP-dependent RNA helicase DDX50 GN=DDX50	DDX50_HUMAN	82.5667	1	12	14	26	0.000357	0.206	KLSSNAVSQITR	0.997	81.5	25	69.9	2	0	0	1303.73	611	622
ATP-dependent RNA helicase DDX50 GN=DDX50	DDX50_HUMAN	82.5667	1	12	14	26	0.000357	0.206	LSSNAVSQITR	0.997	48	25	38.6	2	0	0	1175.64	612	622
Probable ATP-dependent RNA helicase DDX52 GN=DDX52	DDX52_HUMAN	67.5004	0.998	2	3	5	6.87e-05	0.0434	ELLASAPTGSGK	0.993	26.3	25	23.8	2	0	0	1130.61	204	215
Probable ATP-dependent RNA helicase DDX52 GN=DDX52	DDX52_HUMAN	67.5004	0.998	2	3	5	6.87e-05	0.0434	AITFFTEDDKPLLR	0.997	62.3	25	62.3	2	1	0	1665.88	512	525
ATP-dependent RNA helicase DDX54 GN=DDX54	DDX54_HUMAN	98.5979	1	4	4	5	6.87e-05	0.0477	LLVEFAR	0.994	28.1	25	8.54	1	0	0	847.504	284	290
ATP-dependent RNA helicase DDX54 GN=DDX54	DDX54_HUMAN	98.5979	1	4	4	5	6.87e-05	0.0477	CSTLIVTDLAAR	0.997	43.2	25	37.7	1	0	0	1319.7	389	400
ATP-dependent RNA helicase DDX54 GN=DDX54	DDX54_HUMAN	98.5979	1	4	4	5	6.87e-05	0.0477	VADNAQQQYVR	0.997	53.8	25	45.5	2	0	0	1291.64	511	521
ATP-dependent RNA helicase DDX54 GN=DDX54	DDX54_HUMAN	98.5979	1	4	4	5	6.87e-05	0.0477	SRPAPSPESIKR	0.997	24.4	25	24.4	0	1	0	1324.73	522	533
Protein DEK GN=DEK	DEK_HUMAN	42.6759	1	3	3	9	0.000124	0.0853	NVGQFSGFPFEK	0.997	39	25	39	2	0	0	1356.66	126	137
Protein DEK GN=DEK	DEK_HUMAN	42.6759	1	3	3	9	0.000124	0.0853	SICEVLDLER	0.997	50.5	25	47.5	3	0	0	1233.61	159	168
Protein DEK GN=DEK	DEK_HUMAN	42.6759	1	3	3	9	0.000124	0.0853	SGVNSELVKR	0.997	53.4	25	41.6	4	0	0	1088.61	169	178
Putative deoxyribose-phosphate aldolase GN=DERA	DEOC_HUMAN	35.2318	1	6	6	8	0.00011	0.27	IQVNHPAVLR	0.997	34.8	25	28.4	1	0	0	1146.67	18	27
Putative deoxyribose-phosphate aldolase GN=DERA	DEOC_HUMAN	35.2318	1	6	6	8	0.00011	0.27	AAGCNIPVASVAAGFPAGQTHLK	0.997	38.5	25	38.5	0	2	0	2237.15	115	137
Putative deoxyribose-phosphate aldolase GN=DERA	DEOC_HUMAN	35.2318	1	6	6	8	0.00011	0.27	TILATGELGTLTNVYK	0.997	57.4	25	57.4	1	0	0	1693.94	189	204
Putative deoxyribose-phosphate aldolase GN=DERA	DEOC_HUMAN	35.2318	1	6	6	8	0.00011	0.27	ETVNATFPVAIVMLR	0.984	29.6	25	29.6	1	0	0	1660.91	224	238
Putative deoxyribose-phosphate aldolase GN=DERA	DEOC_HUMAN	35.2318	1	6	6	8	0.00011	0.27	IGFKPAGGIR	0.95	22.6	25	18.4	1	0	0	1015.6	251	260
Putative deoxyribose-phosphate aldolase GN=DERA	DEOC_HUMAN	35.2318	1	6	6	8	0.00011	0.27	IGASTLLSDIER	0.997	57.3	25	54.9	2	0	0	1274.7	288	299
Desmoplakin GN=DSP	DESP_HUMAN	331.781	1	8	8	20	0.00022	0.0279	AELIVQPELK	0.997	44.9	25	34.7	2	0	0	1139.67	85	94
Desmoplakin GN=DSP	DESP_HUMAN	331.781	1	8	8	20	0.00022	0.0279	LLQLQEQMR	0.997	39.4	25	28.3	2	0	0	1158.63	142	150
Desmoplakin GN=DSP	DESP_HUMAN	331.781	1	8	8	20	0.00022	0.0279	QLQNIIQATSR	0.997	42.3	25	37	6	0	0	1271.71	271	281
Desmoplakin GN=DSP	DESP_HUMAN	331.781	1	8	8	20	0.00022	0.0279	QVQNLVNK	0.988	27.2	25	17.4	1	0	0	942.537	434	441
Desmoplakin GN=DSP	DESP_HUMAN	331.781	1	8	8	20	0.00022	0.0279	RVEEDIQQQK	0.997	43.2	25	27.7	1	0	0	1272.65	1425	1434
Desmoplakin GN=DSP	DESP_HUMAN	331.781	1	8	8	20	0.00022	0.0279	YKQSLDDAAK	0.994	28.7	25	24.5	2	0	0	1138.57	1465	1474
Desmoplakin GN=DSP	DESP_HUMAN	331.781	1	8	8	20	0.00022	0.0279	SVEEVASEIQPFLR	0.997	42.7	25	26.1	1	0	0	1603.83	2000	2013
Desmoplakin GN=DSP	DESP_HUMAN	331.781	1	8	8	20	0.00022	0.0279	ISTEEAIR	0.953	19	25	4.27	1	0	0	918.489	2745	2752
Estradiol 17-beta-dehydrogenase 12 GN=HSD17B12	DHB12_HUMAN	34.3254	1	5	5	16	0.00022	0.221	TIAVDFASEDIYDKIK	0.997	80.3	25	80.3	3	0	0	1827.94	104	119
Estradiol 17-beta-dehydrogenase 12 GN=HSD17B12	DHB12_HUMAN	34.3254	1	5	5	16	0.00022	0.221	MININILSVCK	0.997	57.1	25	56.6	4	0	0	1320.7	157	167
Estradiol 17-beta-dehydrogenase 12 GN=HSD17B12	DHB12_HUMAN	34.3254	1	5	5	16	0.00022	0.221	GVFVQSVLPYFVATK	0.997	43.3	25	43.3	4	0	0	1654.92	224	238
Estradiol 17-beta-dehydrogenase 12 GN=HSD17B12	DHB12_HUMAN	34.3254	1	5	5	16	0.00022	0.221	IRKPTLDKPSPETFVK	0.99	26.6	25	26.6	0	2	0	1856.06	242	257
Estradiol 17-beta-dehydrogenase 12 GN=HSD17B12	DHB12_HUMAN	34.3254	1	5	5	16	0.00022	0.221	SAIKTVGLQSR	0.997	54.7	25	54.7	3	0	0	1159.68	258	268
7-dehydrocholesterol reductase GN=DHCR7	DHCR7_HUMAN	54.491	1	6	6	12	0.000165	0.105	SLDGVTNDR	0.997	44.7	25	33.7	2	0	0	976.47	14	22
7-dehydrocholesterol reductase GN=DHCR7	DHCR7_HUMAN	54.491	1	6	6	12	0.000165	0.105	SLDGVTNDRTASQGQWGR	0.997	23.2	25	23.2	0	2	0	1947.93	14	31
7-dehydrocholesterol reductase GN=DHCR7	DHCR7_HUMAN	54.491	1	6	6	12	0.000165	0.105	TASQGQWGR	0.997	49.1	25	41.8	2	0	0	990.475	23	31
7-dehydrocholesterol reductase GN=DHCR7	DHCR7_HUMAN	54.491	1	6	6	12	0.000165	0.105	VIECSYTSADGQR	0.997	84.4	25	84.4	3	0	0	1485.66	377	389
7-dehydrocholesterol reductase GN=DHCR7	DHCR7_HUMAN	54.491	1	6	6	12	0.000165	0.105	LLVSGFWGVAR	0.997	47.8	25	47.8	2	0	0	1204.68	394	404
7-dehydrocholesterol reductase GN=DHCR7	DHCR7_HUMAN	54.491	1	6	6	12	0.000165	0.105	YTAAVPYR	0.96	25.8	25	25.8	1	0	0	940.489	462	469
Putative pre-mRNA-splicing factor ATP-dependent RNA helicase DHX15 GN=DHX15	DHX15_HUMAN	90.9352	1	13	16	31	0.000426	0.17	ASTNAMLISAGLPPLK	0.981	24.2	25	24.2	1	0	0	1583.88	63	78
Putative pre-mRNA-splicing factor ATP-dependent RNA helicase DHX15 GN=DHX15	DHX15_HUMAN	90.9352	1	13	16	31	0.000426	0.17	HQSFVLVGETGSGK	0.997	56.9	25	56.9	2	2	0	1445.74	153	166
Putative pre-mRNA-splicing factor ATP-dependent RNA helicase DHX15 GN=DHX15	DHX15_HUMAN	90.9352	1	13	16	31	0.000426	0.17	RGVACTQPR	0.997	42.8	25	34.6	2	0	0	1044.54	186	194
Putative pre-mRNA-splicing factor ATP-dependent RNA helicase DHX15 GN=DHX15	DHX15_HUMAN	90.9352	1	13	16	31	0.000426	0.17	RVAAMSVAQR	0.997	45.7	25	30.8	2	0	0	1088.6	195	204
Putative pre-mRNA-splicing factor ATP-dependent RNA helicase DHX15 GN=DHX15	DHX15_HUMAN	90.9352	1	13	16	31	0.000426	0.17	VAAMSVAQR	0.997	56	25	25.6	2	0	0	932.498	196	204
Putative pre-mRNA-splicing factor ATP-dependent RNA helicase DHX15 GN=DHX15	DHX15_HUMAN	90.9352	1	13	16	31	0.000426	0.17	YGVIILDEAHER	0.997	42	25	42	2	2	0	1414.73	254	265
Putative pre-mRNA-splicing factor ATP-dependent RNA helicase DHX15 GN=DHX15	DHX15_HUMAN	90.9352	1	13	16	31	0.000426	0.17	IRVESLLVTAISK	0.997	38.8	25	38.8	3	2	0	1428.88	451	463
Putative pre-mRNA-splicing factor ATP-dependent RNA helicase DHX15 GN=DHX15	DHX15_HUMAN	90.9352	1	13	16	31	0.000426	0.17	AYKTEMQDNTYPEILR	0.973	30.1	25	30.1	1	0	0	1971.95	489	504
Putative pre-mRNA-splicing factor ATP-dependent RNA helicase DHX15 GN=DHX15	DHX15_HUMAN	90.9352	1	13	16	31	0.000426	0.17	SNLGSVVLQLK	0.997	69.8	25	64	2	0	0	1157.69	505	515
Putative pre-mRNA-splicing factor ATP-dependent RNA helicase DHX15 GN=DHX15	DHX15_HUMAN	90.9352	1	13	16	31	0.000426	0.17	SNLGSVVLQLKK	0.997	61.3	25	61.3	2	0	0	1285.78	505	516
Putative pre-mRNA-splicing factor ATP-dependent RNA helicase DHX15 GN=DHX15	DHX15_HUMAN	90.9352	1	13	16	31	0.000426	0.17	SLMSADNVR	0.996	34.7	25	21.9	2	0	0	992.483	653	661
Putative pre-mRNA-splicing factor ATP-dependent RNA helicase DHX15 GN=DHX15	DHX15_HUMAN	90.9352	1	13	16	31	0.000426	0.17	ALVTGYFMQVAHLER	0.997	62.9	25	56.6	2	0	0	1734.9	692	706
Putative pre-mRNA-splicing factor ATP-dependent RNA helicase DHX15 GN=DHX15	DHX15_HUMAN	90.9352	1	13	16	31	0.000426	0.17	LQSKEYSQY	0.996	28.9	25	28.9	2	0	0	1145.55	787	795
Putative ATP-dependent RNA helicase DHX30 GN=DHX30	DHX30_HUMAN	133.942	1	13	13	35	0.000481	0.117	NLLNSVIGR	0.997	34.3	25	21.6	5	0	0	985.579	55	63
Putative ATP-dependent RNA helicase DHX30 GN=DHX30	DHX30_HUMAN	133.942	1	13	13	35	0.000481	0.117	SVEVEGYGSK	0.997	40.3	25	37.3	1	0	0	1054.51	96	105
Putative ATP-dependent RNA helicase DHX30 GN=DHX30	DHX30_HUMAN	133.942	1	13	13	35	0.000481	0.117	QLNPESIRPGGPGGLSR	0.991	18.7	25	16.5	0	1	0	1734.92	167	183
Putative ATP-dependent RNA helicase DHX30 GN=DHX30	DHX30_HUMAN	133.942	1	13	13	35	0.000481	0.117	VIQIATSSSTAK	0.997	64.2	25	62	2	0	0	1205.67	252	263
Putative ATP-dependent RNA helicase DHX30 GN=DHX30	DHX30_HUMAN	133.942	1	13	13	35	0.000481	0.117	IPQLLLER	0.989	28.5	25	22.8	1	0	0	981.609	467	474
Putative ATP-dependent RNA helicase DHX30 GN=DHX30	DHX30_HUMAN	133.942	1	13	13	35	0.000481	0.117	CNVIITQPR	0.997	52.4	25	35.4	3	0	0	1100.59	484	492
Putative ATP-dependent RNA helicase DHX30 GN=DHX30	DHX30_HUMAN	133.942	1	13	13	35	0.000481	0.117	RISAVSVAQR	0.997	30.7	25	10.4	5	0	0	1086.64	493	502
Putative ATP-dependent RNA helicase DHX30 GN=DHX30	DHX30_HUMAN	133.942	1	13	13	35	0.000481	0.117	TPLENLVLQAK	0.997	52.5	25	52.5	4	0	0	1225.72	814	824
Putative ATP-dependent RNA helicase DHX30 GN=DHX30	DHX30_HUMAN	133.942	1	13	13	35	0.000481	0.117	AIVLAAIFR	0.997	58.6	25	58.6	6	0	0	973.619	886	894
Putative ATP-dependent RNA helicase DHX30 GN=DHX30	DHX30_HUMAN	133.942	1	13	13	35	0.000481	0.117	ALLSHDSGSDHLAFVR	0.997	31	25	31	0	2	0	1724.87	926	941
Putative ATP-dependent RNA helicase DHX30 GN=DHX30	DHX30_HUMAN	133.942	1	13	13	35	0.000481	0.117	FKPNSVTYR	0.996	29.3	25	25.6	1	0	0	1111.59	1041	1049
Putative ATP-dependent RNA helicase DHX30 GN=DHX30	DHX30_HUMAN	133.942	1	13	13	35	0.000481	0.117	SGNILLHK	0.995	32	25	22.1	2	0	0	881.52	1052	1059
Putative ATP-dependent RNA helicase DHX30 GN=DHX30	DHX30_HUMAN	133.942	1	13	13	35	0.000481	0.117	ATISLSDSDLLR	0.997	36.8	25	30.6	2	0	0	1290.69	1116	1127
Probable ATP-dependent RNA helicase DHX40 GN=DHX40	DHX40_HUMAN	88.5621	0.998	2	2	4	5.49e-05	0.0308	LGLDILEVVPISK	0.997	42.3	25	42.3	2	0	0	1395.85	375	387
Probable ATP-dependent RNA helicase DHX40 GN=DHX40	DHX40_HUMAN	88.5621	0.998	2	2	4	5.49e-05	0.0308	TSLTSVVLTLK	0.997	43.2	25	43.2	2	0	0	1161.71	429	439
ATP-dependent RNA helicase A GN=DHX9	DHX9_HUMAN	140.962	1	23	26	83	0.00114	0.144	KMTPSYEIR	0.997	38.1	25	28.8	4	0	0	1124.58	16	24
ATP-dependent RNA helicase A GN=DHX9	DHX9_HUMAN	140.962	1	23	26	83	0.00114	0.144	MTPSYEIR	0.953	19.5	25	19.5	1	0	0	996.482	17	24
ATP-dependent RNA helicase A GN=DHX9	DHX9_HUMAN	140.962	1	23	26	83	0.00114	0.144	DAQSNAARDFVNYLVR	0.997	33.8	25	33.8	0	4	0	1838.91	56	71
ATP-dependent RNA helicase A GN=DHX9	DHX9_HUMAN	140.962	1	23	26	83	0.00114	0.144	DFVNYLVR	0.997	43.5	25	34.1	8	0	0	1025.54	64	71
ATP-dependent RNA helicase A GN=DHX9	DHX9_HUMAN	140.962	1	23	26	83	0.00114	0.144	GANLKDYYSR	0.99	25.8	25	24.3	1	0	0	1186.59	142	151
ATP-dependent RNA helicase A GN=DHX9	DHX9_HUMAN	140.962	1	23	26	83	0.00114	0.144	LNQYFQK	0.997	33.7	25	18.6	2	0	0	940.489	185	191
ATP-dependent RNA helicase A GN=DHX9	DHX9_HUMAN	140.962	1	23	26	83	0.00114	0.144	LNQYFQKEK	0.997	35.4	25	5.84	2	0	0	1197.63	185	193
ATP-dependent RNA helicase A GN=DHX9	DHX9_HUMAN	140.962	1	23	26	83	0.00114	0.144	LAAQSCALSLVR	0.997	60.7	25	56.6	13	0	0	1288.7	237	248
ATP-dependent RNA helicase A GN=DHX9	DHX9_HUMAN	140.962	1	23	26	83	0.00114	0.144	LAQFEPSQR	0.997	49.7	25	43.8	2	0	0	1075.55	315	323
ATP-dependent RNA helicase A GN=DHX9	DHX9_HUMAN	140.962	1	23	26	83	0.00114	0.144	AAECNIVVTQPR	0.997	61.5	25	60.3	4	0	0	1357.69	435	446
ATP-dependent RNA helicase A GN=DHX9	DHX9_HUMAN	140.962	1	23	26	83	0.00114	0.144	RISAVSVAER	0.997	45.2	25	29	6	0	0	1087.62	447	456
ATP-dependent RNA helicase A GN=DHX9	DHX9_HUMAN	140.962	1	23	26	83	0.00114	0.144	ISAVSVAER	0.997	70.9	25	43.6	4	0	0	931.521	448	456
ATP-dependent RNA helicase A GN=DHX9	DHX9_HUMAN	140.962	1	23	26	83	0.00114	0.144	KVFDPVPVGVTK	0.997	44.9	25	44.9	2	0	0	1285.75	697	708
ATP-dependent RNA helicase A GN=DHX9	DHX9_HUMAN	140.962	1	23	26	83	0.00114	0.144	VFDPVPVGVTK	0.995	28.7	25	28.7	2	0	0	1157.66	698	708
ATP-dependent RNA helicase A GN=DHX9	DHX9_HUMAN	140.962	1	23	26	83	0.00114	0.144	VRPGFCFHLCSR	0.997	34.4	25	34.4	0	4	0	1535.74	768	779
ATP-dependent RNA helicase A GN=DHX9	DHX9_HUMAN	140.962	1	23	26	83	0.00114	0.144	LGGIGQFLAK	0.997	68.2	25	61.2	10	0	0	1003.59	810	819
ATP-dependent RNA helicase A GN=DHX9	DHX9_HUMAN	140.962	1	23	26	83	0.00114	0.144	ILAKLPIEPR	0.997	38.6	25	38.6	2	0	0	1149.74	854	863
ATP-dependent RNA helicase A GN=DHX9	DHX9_HUMAN	140.962	1	23	26	83	0.00114	0.144	KILTTEGR	0.993	26.5	25	8.15	2	0	0	917.542	1011	1018
ATP-dependent RNA helicase A GN=DHX9	DHX9_HUMAN	140.962	1	23	26	83	0.00114	0.144	ILTTEGRNALIHK	0.997	29.1	25	29.1	1	1	0	1465.85	1012	1024
ATP-dependent RNA helicase A GN=DHX9	DHX9_HUMAN	140.962	1	23	26	83	0.00114	0.144	QISRPSAAGINLMIGSTR	0.997	53.8	25	53.8	0	3	0	1888.01	1137	1154
ATP-dependent RNA helicase A GN=DHX9	DHX9_HUMAN	140.962	1	23	26	83	0.00114	0.144	YGDGPRPPK	0.997	49.1	25	36.8	2	0	0	986.506	1155	1163
ATP-dependent RNA helicase A GN=DHX9	DHX9_HUMAN	140.962	1	23	26	83	0.00114	0.144	YGDGPRPPKMAR	0.946	14.5	25	14.3	0	1	0	1360.68	1155	1166
ATP-dependent RNA helicase A GN=DHX9	DHX9_HUMAN	140.962	1	23	26	83	0.00114	0.144	YDNGSGYR	0.997	37.1	25	37.1	2	0	0	931.39	1167	1174
Mitochondrial dicarboxylate carrier GN=SLC25A10	DIC_HUMAN	31.2827	1	9	11	19	0.000261	0.443	VHLQTQQEVK	0.997	36.6	25	31.8	2	0	0	1209.66	32	41
Mitochondrial dicarboxylate carrier GN=SLC25A10	DIC_HUMAN	31.2827	1	9	11	19	0.000261	0.443	TDGILALYSGLSASLCR	0.997	89.8	25	89.8	1	0	0	1796.92	54	70
Mitochondrial dicarboxylate carrier GN=SLC25A10	DIC_HUMAN	31.2827	1	9	11	19	0.000261	0.443	GSQGPLPFHEK	0.997	33.1	25	25.9	2	0	0	1196.61	92	102
Mitochondrial dicarboxylate carrier GN=SLC25A10	DIC_HUMAN	31.2827	1	9	11	19	0.000261	0.443	VLLGSVSGLAGGFVGTPADLVNVR	0.997	74.2	25	74.2	2	2	0	2298.28	103	126
Mitochondrial dicarboxylate carrier GN=SLC25A10	DIC_HUMAN	31.2827	1	9	11	19	0.000261	0.443	MQNDVKLPQGQR	0.954	24.5	25	24.1	1	0	0	1429.72	127	138
Mitochondrial dicarboxylate carrier GN=SLC25A10	DIC_HUMAN	31.2827	1	9	11	19	0.000261	0.443	NYAHALDGLYR	0.997	53.1	25	50.5	2	2	0	1292.64	140	150
Mitochondrial dicarboxylate carrier GN=SLC25A10	DIC_HUMAN	31.2827	1	9	11	19	0.000261	0.443	LFSGATMASSR	0.997	51.9	25	43.3	2	0	0	1143.55	160	170
Mitochondrial dicarboxylate carrier GN=SLC25A10	DIC_HUMAN	31.2827	1	9	11	19	0.000261	0.443	GALVTVGQLSCYDQAK	0.997	91.6	25	91.6	2	0	0	1709.85	171	186
Mitochondrial dicarboxylate carrier GN=SLC25A10	DIC_HUMAN	31.2827	1	9	11	19	0.000261	0.443	GEYQGVFHCAVETAK	0.996	29	25	29	1	0	0	1695.78	232	246
Probable dimethyladenosine transferase GN=DIMT1	DIM1_HUMAN	35.2376	1	9	9	16	0.00022	0.319	NPLIINSIIDK	0.997	38.2	25	38.2	2	0	0	1239.73	41	51
Probable dimethyladenosine transferase GN=DIMT1	DIM1_HUMAN	35.2376	1	9	9	16	0.00022	0.319	AALRPTDVVLEVGPGTGNMTVK	0.997	38.2	25	38.2	0	1	0	2241.19	52	73
Probable dimethyladenosine transferase GN=DIMT1	DIM1_HUMAN	35.2376	1	9	9	16	0.00022	0.319	LVAELHKR	0.997	41.1	25	21	1	0	0	965.589	90	97
Probable dimethyladenosine transferase GN=DIMT1	DIM1_HUMAN	35.2376	1	9	9	16	0.00022	0.319	LVAKPGDKLYCR	0.997	38.4	25	38	0	2	0	1419.78	163	174
Probable dimethyladenosine transferase GN=DIMT1	DIM1_HUMAN	35.2376	1	9	9	16	0.00022	0.319	LSINTQLLAR	0.997	69	25	57.5	4	0	0	1128.67	175	184
Probable dimethyladenosine transferase GN=DIMT1	DIM1_HUMAN	35.2376	1	9	9	16	0.00022	0.319	NNFRPPPKVESSVVR	0.997	25.3	25	25.3	0	1	0	1725.94	194	208
Probable dimethyladenosine transferase GN=DIMT1	DIM1_HUMAN	35.2376	1	9	9	16	0.00022	0.319	SSAVQQLLEK	0.997	57.8	25	40.1	2	0	0	1102.61	244	253
Probable dimethyladenosine transferase GN=DIMT1	DIM1_HUMAN	35.2376	1	9	9	16	0.00022	0.319	SSAVQQLLEKNYR	0.997	52.3	25	50.3	2	0	0	1535.82	244	256
Probable dimethyladenosine transferase GN=DIMT1	DIM1_HUMAN	35.2376	1	9	9	16	0.00022	0.319	SMDIDDFIR	0.992	25.9	25	21.6	1	0	0	1111.51	292	300
DnaJ homolog subfamily C member 10 GN=DNAJC10	DJC10_HUMAN	91.0824	1	15	23	40	0.000549	0.185	DFAKEVDGLLR	0.988	26	25	26	1	0	0	1262.67	170	180
DnaJ homolog subfamily C member 10 GN=DNAJC10	DJC10_HUMAN	91.0824	1	15	23	40	0.000549	0.185	IGAVNCGDDRMLCR	0.997	43.8	25	43.8	2	4	0	1636.74	181	194
DnaJ homolog subfamily C member 10 GN=DNAJC10	DJC10_HUMAN	91.0824	1	15	23	40	0.000549	0.185	MKGVNSYPSLFIFR	0.997	49.2	25	49.2	2	2	0	1674.87	195	208
DnaJ homolog subfamily C member 10 GN=DNAJC10	DJC10_HUMAN	91.0824	1	15	23	40	0.000549	0.185	GVNSYPSLFIFR	0.997	41.5	25	40.7	3	0	0	1399.74	197	208
DnaJ homolog subfamily C member 10 GN=DNAJC10	DJC10_HUMAN	91.0824	1	15	23	40	0.000549	0.185	SGMAPVKYHGDR	0.997	23	25	23	0	1	0	1317.64	209	220
DnaJ homolog subfamily C member 10 GN=DNAJC10	DJC10_HUMAN	91.0824	1	15	23	40	0.000549	0.185	GGDCLTSQTR	0.997	69.1	25	31.7	2	0	0	1094.49	267	276
DnaJ homolog subfamily C member 10 GN=DNAJC10	DJC10_HUMAN	91.0824	1	15	23	40	0.000549	0.185	TLLKNDHIQVGR	0.997	41.6	25	41.6	1	2	0	1393.79	389	400
DnaJ homolog subfamily C member 10 GN=DNAJC10	DJC10_HUMAN	91.0824	1	15	23	40	0.000549	0.185	ILYDILAFAK	0.997	40.3	25	39.1	2	0	0	1166.68	439	448
DnaJ homolog subfamily C member 10 GN=DNAJC10	DJC10_HUMAN	91.0824	1	15	23	40	0.000549	0.185	ASNLLYGQLK	0.997	57.5	25	50.1	3	0	0	1106.62	493	502
DnaJ homolog subfamily C member 10 GN=DNAJC10	DJC10_HUMAN	91.0824	1	15	23	40	0.000549	0.185	AGKVDCQAYAQTCQK	0.997	68	25	68	2	2	0	1727.78	723	737
DnaJ homolog subfamily C member 10 GN=DNAJC10	DJC10_HUMAN	91.0824	1	15	23	40	0.000549	0.185	VDCQAYAQTCQK	0.997	40.2	25	34.8	2	0	0	1471.63	726	737
DnaJ homolog subfamily C member 10 GN=DNAJC10	DJC10_HUMAN	91.0824	1	15	23	40	0.000549	0.185	AYPTVKFYFYER	0.983	17	25	15.2	0	1	0	1583.79	742	753
DnaJ homolog subfamily C member 10 GN=DNAJC10	DJC10_HUMAN	91.0824	1	15	23	40	0.000549	0.185	NFQEEQINTR	0.997	73.2	25	54.8	3	0	0	1278.61	757	766
DnaJ homolog subfamily C member 10 GN=DNAJC10	DJC10_HUMAN	91.0824	1	15	23	40	0.000549	0.185	NFQEEQINTRDAK	0.997	38.4	25	31.1	2	0	0	1592.77	757	769
DnaJ homolog subfamily C member 10 GN=DNAJC10	DJC10_HUMAN	91.0824	1	15	23	40	0.000549	0.185	AIAALISEKLETLR	0.997	54.1	25	48.8	2	1	0	1527.91	770	783
DnaJ homolog subfamily C member 11 GN=DNAJC11	DJC11_HUMAN	63.2792	1	8	8	11	0.000151	0.182	EASSEELKAAYR	0.961	19.7	25	19.6	1	0	0	1353.66	24	35
DnaJ homolog subfamily C member 11 GN=DNAJC11	DJC11_HUMAN	63.2792	1	8	8	11	0.000151	0.182	AIYDIYGKR	0.997	52.4	25	40.8	2	0	0	1098.59	76	84
DnaJ homolog subfamily C member 11 GN=DNAJC11	DJC11_HUMAN	63.2792	1	8	8	11	0.000151	0.182	CFVTTNCALQFSSR	0.997	75.2	25	71.7	1	0	0	1690.77	235	248
DnaJ homolog subfamily C member 11 GN=DNAJC11	DJC11_HUMAN	63.2792	1	8	8	11	0.000151	0.182	GIRPGLTTVLAR	0.993	29.6	25	16.4	2	0	0	1253.77	249	260
DnaJ homolog subfamily C member 11 GN=DNAJC11	DJC11_HUMAN	63.2792	1	8	8	11	0.000151	0.182	AGFFGTVVEYGAER	0.997	68.1	25	64.7	1	0	0	1502.73	328	341
DnaJ homolog subfamily C member 11 GN=DNAJC11	DJC11_HUMAN	63.2792	1	8	8	11	0.000151	0.182	HSVLGAAVSVGVPQGVSLK	0.997	34.2	25	34.2	0	2	0	1805.03	346	364
DnaJ homolog subfamily C member 11 GN=DNAJC11	DJC11_HUMAN	63.2792	1	8	8	11	0.000151	0.182	KQEAESAVR	0.997	44.4	25	31	1	0	0	1017.53	435	443
DnaJ homolog subfamily C member 11 GN=DNAJC11	DJC11_HUMAN	63.2792	1	8	8	11	0.000151	0.182	VIDVTVPLQCLVK	0.997	33.5	25	33.5	1	0	0	1483.86	485	497
DnaJ homolog subfamily C member 13 GN=DNAJC13	DJC13_HUMAN	254.423	1	13	13	18	0.000247	0.0727	GQGTEFNLTFR	0.994	28.6	25	25.9	1	0	0	1269.62	63	73
DnaJ homolog subfamily C member 13 GN=DNAJC13	DJC13_HUMAN	254.423	1	13	13	18	0.000247	0.0727	AGFLAFTQLPK	0.997	52.2	25	37.4	2	0	0	1192.67	440	450
DnaJ homolog subfamily C member 13 GN=DNAJC13	DJC13_HUMAN	254.423	1	13	13	18	0.000247	0.0727	AIIEEGDKEIATK	0.997	50.3	25	42.5	1	0	0	1416.76	587	599
DnaJ homolog subfamily C member 13 GN=DNAJC13	DJC13_HUMAN	254.423	1	13	13	18	0.000247	0.0727	LLLEEDENEESGSIKR	0.997	23.9	25	23.9	0	1	0	1860.92	834	849
DnaJ homolog subfamily C member 13 GN=DNAJC13	DJC13_HUMAN	254.423	1	13	13	18	0.000247	0.0727	AYEFLCTK	0.946	21.4	25	14.3	1	0	0	1031.49	1349	1356
DnaJ homolog subfamily C member 13 GN=DNAJC13	DJC13_HUMAN	254.423	1	13	13	18	0.000247	0.0727	IVDGPDPENIILILK	0.996	29.3	25	29.3	1	0	0	1648.95	1360	1374
DnaJ homolog subfamily C member 13 GN=DNAJC13	DJC13_HUMAN	254.423	1	13	13	18	0.000247	0.0727	TQSILFNR	0.986	24.5	25	23.3	1	0	0	978.537	1375	1382
DnaJ homolog subfamily C member 13 GN=DNAJC13	DJC13_HUMAN	254.423	1	13	13	18	0.000247	0.0727	SEETNQQEVANSLAK	0.997	59.2	25	54.6	2	0	0	1647.78	1566	1580
DnaJ homolog subfamily C member 13 GN=DNAJC13	DJC13_HUMAN	254.423	1	13	13	18	0.000247	0.0727	LGGYLAEEQATPENPTIRK	0.997	32.7	25	32.7	0	2	0	2087.08	1589	1607
DnaJ homolog subfamily C member 13 GN=DNAJC13	DJC13_HUMAN	254.423	1	13	13	18	0.000247	0.0727	LAVASVTEILK	0.991	26.2	25	26.2	1	0	0	1143.7	1621	1631
DnaJ homolog subfamily C member 13 GN=DNAJC13	DJC13_HUMAN	254.423	1	13	13	18	0.000247	0.0727	VYNEVPTFQLEVPK	0.994	29.6	25	29.6	2	0	0	1662.87	1695	1708
DnaJ homolog subfamily C member 13 GN=DNAJC13	DJC13_HUMAN	254.423	1	13	13	18	0.000247	0.0727	VEMALEALR	0.997	31	25	15.1	1	0	0	1031.56	1749	1757
DnaJ homolog subfamily C member 13 GN=DNAJC13	DJC13_HUMAN	254.423	1	13	13	18	0.000247	0.0727	VIHALSENELCVR	0.997	25.3	25	22.5	0	2	0	1539.79	2072	2084
H/ACA ribonucleoprotein complex subunit 4 GN=DKC1	DKC1_HUMAN	57.6752	1	3	4	6	8.24e-05	0.0661	SQQSAGKEYVGIVR	0.997	59	25	59	2	0	0	1521.8	145	158
H/ACA ribonucleoprotein complex subunit 4 GN=DKC1	DKC1_HUMAN	57.6752	1	3	4	6	8.24e-05	0.0661	LHNAIEGGTQLSR	0.997	76.2	25	76.2	2	1	0	1395.73	159	171
H/ACA ribonucleoprotein complex subunit 4 GN=DKC1	DKC1_HUMAN	57.6752	1	3	4	6	8.24e-05	0.0661	LLTSHKR	0.997	35.5	25	20	1	0	0	854.521	292	298
DnaJ homolog subfamily A member 1 GN=DNAJA1	DNJA1_HUMAN	44.8686	1	5	5	10	0.000137	0.149	QISQAYEVLSDAK	0.997	93.1	25	91.1	2	0	0	1451.74	47	59
DnaJ homolog subfamily A member 1 GN=DNAJA1	DNJA1_HUMAN	44.8686	1	5	5	10	0.000137	0.149	ELYDKGGEQAIK	0.995	31.1	25	24.6	2	0	0	1350.69	62	73
DnaJ homolog subfamily A member 1 GN=DNAJA1	DNJA1_HUMAN	44.8686	1	5	5	10	0.000137	0.149	NVICDKCEGR	0.993	27.5	25	27.4	2	0	0	1250.56	131	140
DnaJ homolog subfamily A member 1 GN=DNAJA1	DNJA1_HUMAN	44.8686	1	5	5	10	0.000137	0.149	TIVITSHPGQIVK	0.997	54.4	25	53.5	2	0	0	1392.82	284	296
DnaJ homolog subfamily A member 1 GN=DNAJA1	DNJA1_HUMAN	44.8686	1	5	5	10	0.000137	0.149	CVLNEGMPIYR	0.997	41.3	25	41.3	2	0	0	1351.65	302	312
DnaJ homolog subfamily A member 2 GN=DNAJA2	DNJA2_HUMAN	45.7457	0.999	2	2	4	5.49e-05	0.051	NVLCSACSGQGGK	0.997	72.1	25	72.1	2	0	0	1337.59	140	152
DnaJ homolog subfamily A member 2 GN=DNAJA2	DNJA2_HUMAN	45.7457	0.999	2	2	4	5.49e-05	0.051	VIEPGCVR	0.997	35.4	25	29.5	2	0	0	929.487	303	310
DnaJ homolog subfamily A member 3, mitochondrial GN=DNAJA3	DNJA3_HUMAN	52.4893	1	9	11	24	0.00033	0.206	KAYYQLAK	0.991	25.7	25	12	1	0	0	984.551	111	118
DnaJ homolog subfamily A member 3, mitochondrial GN=DNAJA3	DNJA3_HUMAN	52.4893	1	9	11	24	0.00033	0.206	GGPTVDPEELFR	0.997	38	25	38	4	0	0	1316.65	176	187
DnaJ homolog subfamily A member 3, mitochondrial GN=DNAJA3	DNJA3_HUMAN	52.4893	1	9	11	24	0.00033	0.206	GVNKEFTVNIMDTCER	0.997	20.9	25	20.9	0	2	0	1912.89	223	238
DnaJ homolog subfamily A member 3, mitochondrial GN=DNAJA3	DNJA3_HUMAN	52.4893	1	9	11	24	0.00033	0.206	CGGRGSIIISPCVVCR	0.997	22	25	21.8	0	1	0	1790.88	278	293
DnaJ homolog subfamily A member 3, mitochondrial GN=DNAJA3	DNJA3_HUMAN	52.4893	1	9	11	24	0.00033	0.206	GSIIISPCVVCR	0.997	54.3	25	41.9	4	0	0	1360.71	282	293
DnaJ homolog subfamily A member 3, mitochondrial GN=DNAJA3	DNJA3_HUMAN	52.4893	1	9	11	24	0.00033	0.206	VMIPVPAGVEDGQTVR	0.997	58.2	25	50.5	6	0	0	1683.87	304	319
DnaJ homolog subfamily A member 3, mitochondrial GN=DNAJA3	DNJA3_HUMAN	52.4893	1	9	11	24	0.00033	0.206	EIFITFRVQK	0.997	35.6	25	27	2	0	0	1280.74	326	335
DnaJ homolog subfamily A member 3, mitochondrial GN=DNAJA3	DNJA3_HUMAN	52.4893	1	9	11	24	0.00033	0.206	MGGKGIPR	0.997	39.1	25	29.4	3	0	0	815.456	388	395
DnaJ homolog subfamily A member 3, mitochondrial GN=DNAJA3	DNJA3_HUMAN	52.4893	1	9	11	24	0.00033	0.206	REAGEDEEGFLSK	0.997	37	25	37	1	0	0	1466.68	461	473
DnaJ homolog subfamily C member 9 GN=DNAJC9	DNJC9_HUMAN	29.9103	0.998	2	2	4	5.49e-05	0.0846	VYSVLSDREQR	0.997	33.1	25	23.3	2	0	0	1351.7	65	75
DnaJ homolog subfamily C member 9 GN=DNAJC9	DNJC9_HUMAN	29.9103	0.998	2	2	4	5.49e-05	0.0846	ISLEDIQAFEK	0.997	48.8	25	43.1	2	0	0	1292.67	108	118
Dedicator of cytokinesis protein 4 GN=DOCK4	DOCK4_HUMAN	225.213	1	14	14	23	0.000316	0.0849	GFALKNPNIK	0.997	33.3	25	23.7	1	0	0	1101.64	45	54
Dedicator of cytokinesis protein 4 GN=DOCK4	DOCK4_HUMAN	225.213	1	14	14	23	0.000316	0.0849	NACSVQYR	0.997	46.9	25	42.8	2	0	0	997.452	291	298
Dedicator of cytokinesis protein 4 GN=DOCK4	DOCK4_HUMAN	225.213	1	14	14	23	0.000316	0.0849	EYSSVFSHGVSITR	0.997	54	25	49.7	1	0	0	1568.77	374	387
Dedicator of cytokinesis protein 4 GN=DOCK4	DOCK4_HUMAN	225.213	1	14	14	23	0.000316	0.0849	GIFLGNNNQAMK	0.997	36	25	16.6	2	0	0	1306.66	550	561
Dedicator of cytokinesis protein 4 GN=DOCK4	DOCK4_HUMAN	225.213	1	14	14	23	0.000316	0.0849	ESFCITSFLCSTK	0.997	33.2	25	33.2	2	0	0	1579.71	565	577
Dedicator of cytokinesis protein 4 GN=DOCK4	DOCK4_HUMAN	225.213	1	14	14	23	0.000316	0.0849	TVESQLYTNPDSR	0.997	59.2	25	46.7	2	0	0	1509.72	815	827
Dedicator of cytokinesis protein 4 GN=DOCK4	DOCK4_HUMAN	225.213	1	14	14	23	0.000316	0.0849	IGCTVSLLNFYK	0.99	27.7	25	27.7	1	0	0	1414.74	1179	1190
Dedicator of cytokinesis protein 4 GN=DOCK4	DOCK4_HUMAN	225.213	1	14	14	23	0.000316	0.0849	TSLYLVQSLPGISR	0.997	43.3	25	43.3	2	0	0	1533.86	1441	1454
Dedicator of cytokinesis protein 4 GN=DOCK4	DOCK4_HUMAN	225.213	1	14	14	23	0.000316	0.0849	TLISQCQTR	0.997	50.8	25	37.5	2	0	0	1106.56	1485	1493
Dedicator of cytokinesis protein 4 GN=DOCK4	DOCK4_HUMAN	225.213	1	14	14	23	0.000316	0.0849	LVDQFFVMK	0.997	29.5	25	29.5	1	0	0	1126.6	1576	1584
Dedicator of cytokinesis protein 4 GN=DOCK4	DOCK4_HUMAN	225.213	1	14	14	23	0.000316	0.0849	NSAPASVSPDGTR	0.997	29.2	25	29.2	2	0	0	1258.6	1613	1625
Dedicator of cytokinesis protein 4 GN=DOCK4	DOCK4_HUMAN	225.213	1	14	14	23	0.000316	0.0849	RSPLSYPAVNR	0.993	27.6	25	19.7	2	0	0	1259.69	1630	1640
Dedicator of cytokinesis protein 4 GN=DOCK4	DOCK4_HUMAN	225.213	1	14	14	23	0.000316	0.0849	ERPCSAIYPTPVEPSQR	0.996	25.3	25	22.1	0	1	0	1986.97	1720	1736
Dedicator of cytokinesis protein 4 GN=DOCK4	DOCK4_HUMAN	225.213	1	14	14	23	0.000316	0.0849	HTTSVSPSPAGR	0.99	25.2	25	23	2	0	0	1196.6	1803	1814
Dedicator of cytokinesis protein 7 GN=DOCK7	DOCK7_HUMAN	242.566	0.998	2	2	3	4.12e-05	0.0121	SAVRPASLNLNR	0.988	26	25	26	1	0	0	1297.73	882	893
Dedicator of cytokinesis protein 7 GN=DOCK7	DOCK7_HUMAN	242.566	0.998	2	2	3	4.12e-05	0.0121	SPSGSAFGSQENLR	0.997	51.5	25	49.7	2	0	0	1436.68	1430	1443
Dolichol-phosphate mannosyltransferase subunit 1 GN=DPM1	DPM1_HUMAN	29.636	0.999	2	3	6	8.24e-05	0.0923	QKEGNFDIVSGTR	0.997	48.5	25	44.6	2	2	0	1450.73	135	147
Dolichol-phosphate mannosyltransferase subunit 1 GN=DPM1	DPM1_HUMAN	29.636	0.999	2	3	6	8.24e-05	0.0923	LGGNEIVSFLK	0.997	67.8	25	55.5	2	0	0	1176.66	241	251
DNA polymerase delta catalytic subunit GN=POLD1	DPOD1_HUMAN	123.633	1	3	3	4	5.49e-05	0.028	VQTFPFLGR	0.985	25.2	25	14.4	1	0	0	1064.59	415	423
DNA polymerase delta catalytic subunit GN=POLD1	DPOD1_HUMAN	123.633	1	3	3	4	5.49e-05	0.028	VTGVPLSYLLSR	0.987	24.2	25	24.2	2	0	0	1304.76	538	549
DNA polymerase delta catalytic subunit GN=POLD1	DPOD1_HUMAN	123.633	1	3	3	4	5.49e-05	0.028	IFEPILGEGR	0.997	31.5	25	31.5	1	0	0	1130.62	969	978
DNA polymerase epsilon catalytic subunit A GN=POLE	DPOE1_HUMAN	261.522	1	8	8	12	0.000165	0.0411	GGVITDEEETSKK	0.997	36.7	25	32.2	1	0	0	1392.69	198	210
DNA polymerase epsilon catalytic subunit A GN=POLE	DPOE1_HUMAN	261.522	1	8	8	12	0.000165	0.0411	DSYLPVGSHNLK	0.979	22.5	25	22.3	1	0	0	1329.68	414	425
DNA polymerase epsilon catalytic subunit A GN=POLE	DPOE1_HUMAN	261.522	1	8	8	12	0.000165	0.0411	AIPLAIFQAEPTVR	0.997	58	25	52.6	1	0	0	1525.87	1093	1106
DNA polymerase epsilon catalytic subunit A GN=POLE	DPOE1_HUMAN	261.522	1	8	8	12	0.000165	0.0411	SLAQFSYLEPGSIR	0.997	45.7	25	41.8	2	0	0	1567.81	1472	1485
DNA polymerase epsilon catalytic subunit A GN=POLE	DPOE1_HUMAN	261.522	1	8	8	12	0.000165	0.0411	ASVFVLDTVR	0.997	37.9	25	36.2	2	0	0	1106.62	1510	1519
DNA polymerase epsilon catalytic subunit A GN=POLE	DPOE1_HUMAN	261.522	1	8	8	12	0.000165	0.0411	FLLAYKEER	0.997	34.3	25	17.5	2	0	0	1168.64	1571	1579
DNA polymerase epsilon catalytic subunit A GN=POLE	DPOE1_HUMAN	261.522	1	8	8	12	0.000165	0.0411	LGSSVIYANFNR	0.986	24.7	25	24.7	1	0	0	1340.7	1859	1870
DNA polymerase epsilon catalytic subunit A GN=POLE	DPOE1_HUMAN	261.522	1	8	8	12	0.000165	0.0411	SYVLPEVICR	0.997	32.2	25	23.2	2	0	0	1235.65	2150	2159
Developmentally-regulated GTP-binding protein 2 GN=DRG2	DRG2_HUMAN	40.7479	0.998	2	2	4	5.49e-05	0.0549	VALIGFPSVGK	0.997	29.9	25	29.9	2	0	0	1087.65	65	75
Developmentally-regulated GTP-binding protein 2 GN=DRG2	DRG2_HUMAN	40.7479	0.998	2	2	4	5.49e-05	0.0549	GRQVIAVAR	0.985	23.6	25	23.6	2	0	0	969.595	130	138
Dehydrogenase/reductase SDR family member 7B GN=DHRS7B	DRS7B_HUMAN	35.1199	1	3	4	6	8.24e-05	0.123	VMETNYFGPVALTK	0.997	65.2	25	50.3	2	0	0	1569.8	162	175
Dehydrogenase/reductase SDR family member 7B GN=DHRS7B	DRS7B_HUMAN	35.1199	1	3	4	6	8.24e-05	0.123	YGVMDTTTAQGR	0.997	64.7	25	62	2	0	0	1299.6	256	267
Dehydrogenase/reductase SDR family member 7B GN=DHRS7B	DRS7B_HUMAN	35.1199	1	3	4	6	8.24e-05	0.123	TLAPGLFFSLMASR	0.997	45.5	25	44.5	2	0	0	1526.8	302	315
Double-stranded RNA-specific adenosine deaminase GN=ADAR	DSRAD_HUMAN	136.07	1	2	2	3	4.12e-05	0.0179	KIGELVR	0.958	19.9	25	2.63	1	0	0	814.515	715	721
Double-stranded RNA-specific adenosine deaminase GN=ADAR	DSRAD_HUMAN	136.07	1	2	2	3	4.12e-05	0.0179	YLNTNPVGGLLEYAR	0.997	59.9	25	58.2	2	0	0	1679.88	722	736
RNA/RNP complex-1-interacting phosphatase GN=DUSP11	DUS11_HUMAN	38.9392	0.999	2	2	3	4.12e-05	0.0606	TGYLICR	0.978	24.7	25	16.3	1	0	0	882.45	159	165
RNA/RNP complex-1-interacting phosphatase GN=DUSP11	DUS11_HUMAN	38.9392	0.999	2	2	3	4.12e-05	0.0606	YNLHQIQGHSAPR	0.997	34.5	25	34.5	0	2	0	1520.77	239	251
Cytoplasmic dynein 1 heavy chain 1 GN=DYNC1H1	DYHC1_HUMAN	532.406	1	63	70	210	0.00288	0.141	FLSDPQVHTVLVER	0.997	49	25	49	2	1	0	1639.88	68	81
Cytoplasmic dynein 1 heavy chain 1 GN=DYNC1H1	DYHC1_HUMAN	532.406	1	63	70	210	0.00288	0.141	TPVIDADKPVSSQLR	0.997	66.5	25	66.5	4	5	0	1625.89	122	136
Cytoplasmic dynein 1 heavy chain 1 GN=DYNC1H1	DYHC1_HUMAN	532.406	1	63	70	210	0.00288	0.141	ESPEVLLTLDILK	0.995	34.2	25	27.4	1	0	0	1469.85	293	305
Cytoplasmic dynein 1 heavy chain 1 GN=DYNC1H1	DYHC1_HUMAN	532.406	1	63	70	210	0.00288	0.141	LRDQLGTAK	0.997	55.7	25	41.3	2	0	0	1001.57	568	576
Cytoplasmic dynein 1 heavy chain 1 GN=DYNC1H1	DYHC1_HUMAN	532.406	1	63	70	210	0.00288	0.141	GAIREYQTQLIQR	0.997	36.6	25	36.3	4	2	0	1575.86	599	611
Cytoplasmic dynein 1 heavy chain 1 GN=DYNC1H1	DYHC1_HUMAN	532.406	1	63	70	210	0.00288	0.141	EYQTQLIQR	0.997	45.5	25	27	4	0	0	1178.62	603	611
Cytoplasmic dynein 1 heavy chain 1 GN=DYNC1H1	DYHC1_HUMAN	532.406	1	63	70	210	0.00288	0.141	LKQDGDSFR	0.997	41.9	25	36.9	6	0	0	1065.53	682	690
Cytoplasmic dynein 1 heavy chain 1 GN=DYNC1H1	DYHC1_HUMAN	532.406	1	63	70	210	0.00288	0.141	IFTIESTR	0.974	21.5	25	5	3	0	0	966.525	717	724
Cytoplasmic dynein 1 heavy chain 1 GN=DYNC1H1	DYHC1_HUMAN	532.406	1	63	70	210	0.00288	0.141	MVVLSLPR	0.997	34	25	33	3	0	0	914.549	991	998
Cytoplasmic dynein 1 heavy chain 1 GN=DYNC1H1	DYHC1_HUMAN	532.406	1	63	70	210	0.00288	0.141	GTFDNAETKK	0.984	23.4	25	13.5	2	0	0	1110.54	1091	1100
Cytoplasmic dynein 1 heavy chain 1 GN=DYNC1H1	DYHC1_HUMAN	532.406	1	63	70	210	0.00288	0.141	FGQMLGSNMTEFHSQISK	0.983	16.9	25	16.9	0	1	0	2073.94	1131	1148
Cytoplasmic dynein 1 heavy chain 1 GN=DYNC1H1	DYHC1_HUMAN	532.406	1	63	70	210	0.00288	0.141	DSAIQQQVANLQMK	0.997	45.1	25	42.3	2	0	0	1573.8	1229	1242
Cytoplasmic dynein 1 heavy chain 1 GN=DYNC1H1	DYHC1_HUMAN	532.406	1	63	70	210	0.00288	0.141	IVQEDRAVESR	0.997	39.3	25	29	5	1	0	1301.68	1243	1253
Cytoplasmic dynein 1 heavy chain 1 GN=DYNC1H1	DYHC1_HUMAN	532.406	1	63	70	210	0.00288	0.141	QNLDALLNQLK	0.997	41.8	25	27.9	2	0	0	1269.72	1361	1371
Cytoplasmic dynein 1 heavy chain 1 GN=DYNC1H1	DYHC1_HUMAN	532.406	1	63	70	210	0.00288	0.141	LRQYASYEFVQR	0.988	30.8	25	30.8	2	0	0	1559.8	1377	1388
Cytoplasmic dynein 1 heavy chain 1 GN=DYNC1H1	DYHC1_HUMAN	532.406	1	63	70	210	0.00288	0.141	QYASYEFVQR	0.997	43.9	25	38	3	0	0	1290.61	1379	1388
Cytoplasmic dynein 1 heavy chain 1 GN=DYNC1H1	DYHC1_HUMAN	532.406	1	63	70	210	0.00288	0.141	FQSISTEFLALMK	0.997	60.8	25	58.3	2	0	0	1530.79	1568	1580
Cytoplasmic dynein 1 heavy chain 1 GN=DYNC1H1	DYHC1_HUMAN	532.406	1	63	70	210	0.00288	0.141	SPLVMDVLNIQGVQR	0.997	48.3	25	41.9	2	0	0	1668.91	1585	1599
Cytoplasmic dynein 1 heavy chain 1 GN=DYNC1H1	DYHC1_HUMAN	532.406	1	63	70	210	0.00288	0.141	TPVSITEHPK	0.997	45.2	25	44.7	5	0	0	1108.6	1688	1697
Cytoplasmic dynein 1 heavy chain 1 GN=DYNC1H1	DYHC1_HUMAN	532.406	1	63	70	210	0.00288	0.141	LLAESVTEVEIFGK	0.997	73.1	25	73.1	5	0	0	1534.84	1716	1729
Cytoplasmic dynein 1 heavy chain 1 GN=DYNC1H1	DYHC1_HUMAN	532.406	1	63	70	210	0.00288	0.141	SFEWLSQMR	0.997	41.9	25	41.9	2	0	0	1199.55	1835	1843
Cytoplasmic dynein 1 heavy chain 1 GN=DYNC1H1	DYHC1_HUMAN	532.406	1	63	70	210	0.00288	0.141	LGGSPFGPAGTGK	0.997	58.8	25	53	3	0	0	1145.6	1900	1912
Cytoplasmic dynein 1 heavy chain 1 GN=DYNC1H1	DYHC1_HUMAN	532.406	1	63	70	210	0.00288	0.141	LGGSPFGPAGTGKTESVK	0.997	22.4	25	19.7	0	1	0	1689.88	1900	1917
Cytoplasmic dynein 1 heavy chain 1 GN=DYNC1H1	DYHC1_HUMAN	532.406	1	63	70	210	0.00288	0.141	ALGHQLGR	0.997	36.5	25	20.9	4	0	0	851.485	1918	1925
Cytoplasmic dynein 1 heavy chain 1 GN=DYNC1H1	DYHC1_HUMAN	532.406	1	63	70	210	0.00288	0.141	TSAPITCELLNK	0.997	52.3	25	41.3	4	0	0	1346.7	1993	2004
Cytoplasmic dynein 1 heavy chain 1 GN=DYNC1H1	DYHC1_HUMAN	532.406	1	63	70	210	0.00288	0.141	SNLPDNLKK	0.989	24.7	25	14.8	4	0	0	1028.57	2026	2034
Cytoplasmic dynein 1 heavy chain 1 GN=DYNC1H1	DYHC1_HUMAN	532.406	1	63	70	210	0.00288	0.141	SLAMTKPDR	0.959	20.7	25	9.22	1	0	0	1018.54	2038	2046
Cytoplasmic dynein 1 heavy chain 1 GN=DYNC1H1	DYHC1_HUMAN	532.406	1	63	70	210	0.00288	0.141	TAEVLANK	0.997	32.4	25	23.8	3	0	0	845.473	2061	2068
Cytoplasmic dynein 1 heavy chain 1 GN=DYNC1H1	DYHC1_HUMAN	532.406	1	63	70	210	0.00288	0.141	SVLVSAGNVK	0.997	30.6	25	18	3	0	0	973.568	2095	2104
Cytoplasmic dynein 1 heavy chain 1 GN=DYNC1H1	DYHC1_HUMAN	532.406	1	63	70	210	0.00288	0.141	SVLVSAGNVKR	0.997	49.7	25	46.1	6	0	0	1129.67	2095	2105
Cytoplasmic dynein 1 heavy chain 1 GN=DYNC1H1	DYHC1_HUMAN	532.406	1	63	70	210	0.00288	0.141	SIPLDEGEDEAQR	0.997	53	25	48.7	3	0	0	1458.67	2384	2396
Cytoplasmic dynein 1 heavy chain 1 GN=DYNC1H1	DYHC1_HUMAN	532.406	1	63	70	210	0.00288	0.141	SIPLDEGEDEAQRR	0.995	29.7	25	29.7	3	0	0	1614.77	2384	2397
Cytoplasmic dynein 1 heavy chain 1 GN=DYNC1H1	DYHC1_HUMAN	532.406	1	63	70	210	0.00288	0.141	GKEDEGEEAASPMLQIQR	0.978	16.3	25	11	0	1	0	1987.94	2400	2417
Cytoplasmic dynein 1 heavy chain 1 GN=DYNC1H1	DYHC1_HUMAN	532.406	1	63	70	210	0.00288	0.141	DAATIMQPYFTSNGLVTK	0.997	52.7	25	46.7	4	0	0	1972.97	2418	2435
Cytoplasmic dynein 1 heavy chain 1 GN=DYNC1H1	DYHC1_HUMAN	532.406	1	63	70	210	0.00288	0.141	VPQIEVETHK	0.997	36.8	25	24.1	5	0	0	1179.64	2552	2561
Cytoplasmic dynein 1 heavy chain 1 GN=DYNC1H1	DYHC1_HUMAN	532.406	1	63	70	210	0.00288	0.141	TMTLFSALR	0.997	45.8	25	44.5	4	0	0	1055.56	2602	2610
Cytoplasmic dynein 1 heavy chain 1 GN=DYNC1H1	DYHC1_HUMAN	532.406	1	63	70	210	0.00288	0.141	TPNGVVLAPVQLGK	0.997	46.8	25	46.8	1	0	0	1392.82	2644	2657
Cytoplasmic dynein 1 heavy chain 1 GN=DYNC1H1	DYHC1_HUMAN	532.406	1	63	70	210	0.00288	0.141	TSDQTWVKLER	0.997	41.1	25	28.4	2	0	0	1362.7	2695	2705
Cytoplasmic dynein 1 heavy chain 1 GN=DYNC1H1	DYHC1_HUMAN	532.406	1	63	70	210	0.00288	0.141	IQFVGACNPPTDPGR	0.997	70.3	25	61	3	0	0	1628.79	2706	2720
Cytoplasmic dynein 1 heavy chain 1 GN=DYNC1H1	DYHC1_HUMAN	532.406	1	63	70	210	0.00288	0.141	FTQDTQPHYIYSPR	0.997	48.2	25	48.2	1	0	0	1752.83	2784	2797
Cytoplasmic dynein 1 heavy chain 1 GN=DYNC1H1	DYHC1_HUMAN	532.406	1	63	70	210	0.00288	0.141	AATSPALFNR	0.997	45.2	25	35.8	6	0	0	1047.56	3079	3088
Cytoplasmic dynein 1 heavy chain 1 GN=DYNC1H1	DYHC1_HUMAN	532.406	1	63	70	210	0.00288	0.141	TMAITPR	0.997	33.7	25	28.3	1	0	0	805.424	3168	3174
Cytoplasmic dynein 1 heavy chain 1 GN=DYNC1H1	DYHC1_HUMAN	532.406	1	63	70	210	0.00288	0.141	SMANPPAAVK	0.997	46.1	25	44.2	2	0	0	1001.51	3309	3318
Cytoplasmic dynein 1 heavy chain 1 GN=DYNC1H1	DYHC1_HUMAN	532.406	1	63	70	210	0.00288	0.141	NYMSNPSYNYEIVNR	0.997	87.5	25	87.5	8	0	0	1863.83	3370	3384
Cytoplasmic dynein 1 heavy chain 1 GN=DYNC1H1	DYHC1_HUMAN	532.406	1	63	70	210	0.00288	0.141	ASLACGPMVK	0.995	28.8	25	13.2	2	0	0	1049.51	3385	3394
Cytoplasmic dynein 1 heavy chain 1 GN=DYNC1H1	DYHC1_HUMAN	532.406	1	63	70	210	0.00288	0.141	TEYLSNADERLR	0.947	19.7	25	13.8	1	0	0	1466.72	3550	3561
Cytoplasmic dynein 1 heavy chain 1 GN=DYNC1H1	DYHC1_HUMAN	532.406	1	63	70	210	0.00288	0.141	TSFLDDAFRK	0.997	50.1	25	50.1	2	0	0	1199.61	3612	3621
Cytoplasmic dynein 1 heavy chain 1 GN=DYNC1H1	DYHC1_HUMAN	532.406	1	63	70	210	0.00288	0.141	VTFVNFTVTR	0.997	68.2	25	62.3	2	0	0	1183.65	3696	3705
Cytoplasmic dynein 1 heavy chain 1 GN=DYNC1H1	DYHC1_HUMAN	532.406	1	63	70	210	0.00288	0.141	SSLQSQCLNEVLK	0.997	56.1	25	48.9	4	0	0	1505.76	3706	3718
Cytoplasmic dynein 1 heavy chain 1 GN=DYNC1H1	DYHC1_HUMAN	532.406	1	63	70	210	0.00288	0.141	LQGEFQLR	0.997	38.4	25	29.4	2	0	0	990.537	3734	3741
Cytoplasmic dynein 1 heavy chain 1 GN=DYNC1H1	DYHC1_HUMAN	532.406	1	63	70	210	0.00288	0.141	SLLQALNEVK	0.997	39.8	25	30.5	4	0	0	1114.65	3748	3757
Cytoplasmic dynein 1 heavy chain 1 GN=DYNC1H1	DYHC1_HUMAN	532.406	1	63	70	210	0.00288	0.141	SLLQALNEVKGR	0.997	61.3	25	53.7	1	0	0	1327.77	3748	3759
Cytoplasmic dynein 1 heavy chain 1 GN=DYNC1H1	DYHC1_HUMAN	532.406	1	63	70	210	0.00288	0.141	GVTDHTQR	0.948	19.1	25	15.1	1	0	0	913.449	3848	3855
Cytoplasmic dynein 1 heavy chain 1 GN=DYNC1H1	DYHC1_HUMAN	532.406	1	63	70	210	0.00288	0.141	DLFQVAFNR	0.997	58.2	25	50.9	6	0	0	1109.57	3862	3870
Cytoplasmic dynein 1 heavy chain 1 GN=DYNC1H1	DYHC1_HUMAN	532.406	1	63	70	210	0.00288	0.141	GNEIVLSAGSTPR	0.997	57.1	25	51.2	2	0	0	1300.69	3911	3923
Cytoplasmic dynein 1 heavy chain 1 GN=DYNC1H1	DYHC1_HUMAN	532.406	1	63	70	210	0.00288	0.141	IQGLTVEQAEAVVR	0.997	89.6	25	85.6	10	0	0	1512.84	3924	3937
Cytoplasmic dynein 1 heavy chain 1 GN=DYNC1H1	DYHC1_HUMAN	532.406	1	63	70	210	0.00288	0.141	LFLTMEINPK	0.997	36.7	25	30.8	1	0	0	1205.66	4124	4133
Cytoplasmic dynein 1 heavy chain 1 GN=DYNC1H1	DYHC1_HUMAN	532.406	1	63	70	210	0.00288	0.141	IFVFEPPPGVK	0.997	31.4	25	27.3	7	0	0	1229.69	4144	4154
Cytoplasmic dynein 1 heavy chain 1 GN=DYNC1H1	DYHC1_HUMAN	532.406	1	63	70	210	0.00288	0.141	TFSSIPVSR	0.997	35.8	25	29.5	3	0	0	993.536	4160	4168
Cytoplasmic dynein 1 heavy chain 1 GN=DYNC1H1	DYHC1_HUMAN	532.406	1	63	70	210	0.00288	0.141	KYEFGESDLR	0.977	31	25	21.4	2	0	0	1243.6	4204	4213
Cytoplasmic dynein 1 heavy chain 1 GN=DYNC1H1	DYHC1_HUMAN	532.406	1	63	70	210	0.00288	0.141	TLMAQSIYGGR	0.997	37.3	25	29.5	1	0	0	1196.61	4245	4255
Cytoplasmic dynein 1 heavy chain 1 GN=DYNC1H1	DYHC1_HUMAN	532.406	1	63	70	210	0.00288	0.141	LLNTFLER	0.985	24.5	25	21.2	1	0	0	1005.57	4264	4271
Cytoplasmic dynein 1 heavy chain 1 GN=DYNC1H1	DYHC1_HUMAN	532.406	1	63	70	210	0.00288	0.141	VLLTTQGVDMISK	0.997	67.9	25	61	14	0	0	1404.78	4330	4342
Dynamin-2 GN=DNM2	DYN2_HUMAN	98.0679	1	4	4	9	0.000124	0.0471	SSVLENFVGRDFLPR	0.997	28.3	25	28.3	0	2	0	1735.91	45	59
Dynamin-2 GN=DNM2	DYN2_HUMAN	98.0679	1	4	4	9	0.000124	0.0471	GISPVPINLR	0.997	32.1	25	32.1	2	0	0	1065.64	114	123
Dynamin-2 GN=DNM2	DYN2_HUMAN	98.0679	1	4	4	9	0.000124	0.0471	EVDPQGLR	0.997	48.1	25	40.6	3	0	0	913.474	192	199
Dynamin-2 GN=DNM2	DYN2_HUMAN	98.0679	1	4	4	9	0.000124	0.0471	GYIGVVNR	0.997	36.1	25	29.9	2	0	0	877.489	230	237
Probable rRNA-processing protein EBP2 GN=EBNA1BP2	EBP2_HUMAN	34.8529	1	5	5	7	9.62e-05	0.124	QAQAAVLAVLPR	0.997	39.7	25	31.9	2	0	0	1236.74	111	122
Probable rRNA-processing protein EBP2 GN=EBNA1BP2	EBP2_HUMAN	34.8529	1	5	5	7	9.62e-05	0.124	SDLQMQK	0.995	27.7	25	18.1	1	0	0	849.414	143	149
Probable rRNA-processing protein EBP2 GN=EBNA1BP2	EBP2_HUMAN	34.8529	1	5	5	7	9.62e-05	0.124	VQTEVLQK	0.955	21.1	25	11.6	1	0	0	944.541	180	187
Probable rRNA-processing protein EBP2 GN=EBNA1BP2	EBP2_HUMAN	34.8529	1	5	5	7	9.62e-05	0.124	VQTEVLQKR	0.967	21.4	25	21.4	1	0	0	1100.64	180	188
Probable rRNA-processing protein EBP2 GN=EBNA1BP2	EBP2_HUMAN	34.8529	1	5	5	7	9.62e-05	0.124	ESYDDVSSFR	0.997	37.8	25	37.8	2	0	0	1204.51	263	272
Trifunctional enzyme subunit alpha, mitochondrial GN=HADHA	ECHA_HUMAN	83.0019	1	11	13	22	0.000302	0.18	TLQEVTQLSQEAQR	0.997	79.4	25	64.2	2	0	0	1630.84	112	125
Trifunctional enzyme subunit alpha, mitochondrial GN=HADHA	ECHA_HUMAN	83.0019	1	11	13	22	0.000302	0.18	IVEKLEK	0.957	21.3	25	2.97	1	0	0	858.53	126	132
Trifunctional enzyme subunit alpha, mitochondrial GN=HADHA	ECHA_HUMAN	83.0019	1	11	13	22	0.000302	0.18	TVLGTPEVLLGALPGAGGTQR	0.997	67.7	25	67.7	2	2	0	2007.12	167	187
Trifunctional enzyme subunit alpha, mitochondrial GN=HADHA	ECHA_HUMAN	83.0019	1	11	13	22	0.000302	0.18	TVLGTPEVLLGALPGAGGTQRLPK	0.99	19.8	25	19.8	0	1	0	2345.36	167	190
Trifunctional enzyme subunit alpha, mitochondrial GN=HADHA	ECHA_HUMAN	83.0019	1	11	13	22	0.000302	0.18	MVGVPAALDMMLTGR	0.961	28.5	25	6.04	1	0	0	1593.78	191	205
Trifunctional enzyme subunit alpha, mitochondrial GN=HADHA	ECHA_HUMAN	83.0019	1	11	13	22	0.000302	0.18	LTAYAMTIPFVR	0.997	43.6	25	43.6	2	0	0	1382.75	268	279
Trifunctional enzyme subunit alpha, mitochondrial GN=HADHA	ECHA_HUMAN	83.0019	1	11	13	22	0.000302	0.18	DTSASAVAVGLKQGK	0.997	39.7	25	39.7	2	0	0	1431.78	520	534
Trifunctional enzyme subunit alpha, mitochondrial GN=HADHA	ECHA_HUMAN	83.0019	1	11	13	22	0.000302	0.18	VIIVVKDGPGFYTTR	0.997	36.8	25	26.5	2	2	0	1664.94	535	549
Trifunctional enzyme subunit alpha, mitochondrial GN=HADHA	ECHA_HUMAN	83.0019	1	11	13	22	0.000302	0.18	CLAPMMSEVIR	0.997	29.1	25	22	1	0	0	1306.63	550	560
Trifunctional enzyme subunit alpha, mitochondrial GN=HADHA	ECHA_HUMAN	83.0019	1	11	13	22	0.000302	0.18	ILQEGVDPK	0.994	28.8	25	26.1	2	0	0	998.552	561	569
Trifunctional enzyme subunit alpha, mitochondrial GN=HADHA	ECHA_HUMAN	83.0019	1	11	13	22	0.000302	0.18	FGGGNPELLTQMVSK	0.997	44	25	44	2	0	0	1577.8	611	625
Trifunctional enzyme subunit beta, mitochondrial GN=HADHB	ECHB_HUMAN	51.296	1	10	11	19	0.000261	0.219	NVVVVDGVR	0.997	57.1	25	50.1	2	0	0	956.552	53	61
Trifunctional enzyme subunit beta, mitochondrial GN=HADHB	ECHB_HUMAN	51.296	1	10	11	19	0.000261	0.219	AALTGLLHR	0.997	61.4	25	49.4	2	0	0	951.573	82	90
Trifunctional enzyme subunit beta, mitochondrial GN=HADHB	ECHB_HUMAN	51.296	1	10	11	19	0.000261	0.219	KLMLDLNK	0.997	36.4	25	10	2	0	0	974.571	181	188
Trifunctional enzyme subunit beta, mitochondrial GN=HADHB	ECHB_HUMAN	51.296	1	10	11	19	0.000261	0.219	LSLISKFR	0.997	40.3	25	23.3	2	0	0	963.599	196	203
Trifunctional enzyme subunit beta, mitochondrial GN=HADHB	ECHB_HUMAN	51.296	1	10	11	19	0.000261	0.219	LAAAFAVSR	0.997	70.3	25	57.9	2	0	0	905.52	230	238
Trifunctional enzyme subunit beta, mitochondrial GN=HADHB	ECHB_HUMAN	51.296	1	10	11	19	0.000261	0.219	LEQDEYALR	0.997	58.7	25	46.8	2	0	0	1136.56	239	247
Trifunctional enzyme subunit beta, mitochondrial GN=HADHB	ECHB_HUMAN	51.296	1	10	11	19	0.000261	0.219	ALAMGYKPK	0.997	33.2	25	26.6	2	0	0	994.539	326	334
Trifunctional enzyme subunit beta, mitochondrial GN=HADHB	ECHB_HUMAN	51.296	1	10	11	19	0.000261	0.219	VGLPPLEK	0.991	26.5	25	26.5	1	0	0	852.519	409	416
Trifunctional enzyme subunit beta, mitochondrial GN=HADHB	ECHB_HUMAN	51.296	1	10	11	19	0.000261	0.219	LVMAAANR	0.997	44.3	25	29.4	2	0	0	845.466	437	444
Trifunctional enzyme subunit beta, mitochondrial GN=HADHB	ECHB_HUMAN	51.296	1	10	11	19	0.000261	0.219	EGGQYGLVAACAAGGQGHAMIVEAYPK	0.997	58.4	25	58.4	0	2	0	2721.28	448	474
Proteasome-associated protein ECM29 homolog GN=ECM29	ECM29_HUMAN	204.296	1	9	9	15	0.000206	0.0591	LSSTQEGVR	0.982	24.5	25	11	2	0	0	976.506	47	55
Proteasome-associated protein ECM29 homolog GN=ECM29	ECM29_HUMAN	204.296	1	9	9	15	0.000206	0.0591	SASPFNLAEKPK	0.992	33.5	25	30.4	2	0	0	1288.69	157	168
Proteasome-associated protein ECM29 homolog GN=ECM29	ECM29_HUMAN	204.296	1	9	9	15	0.000206	0.0591	KGAAFGFNVIATR	0.996	29.3	25	26.5	1	0	0	1351.75	1099	1111
Proteasome-associated protein ECM29 homolog GN=ECM29	ECM29_HUMAN	204.296	1	9	9	15	0.000206	0.0591	AGEQLAPFLPQLVPR	0.996	28.9	25	28.4	2	0	0	1635.92	1112	1126
Proteasome-associated protein ECM29 homolog GN=ECM29	ECM29_HUMAN	204.296	1	9	9	15	0.000206	0.0591	ESSCLALNDLLR	0.997	37.9	25	28	2	0	0	1390.7	1180	1191
Proteasome-associated protein ECM29 homolog GN=ECM29	ECM29_HUMAN	204.296	1	9	9	15	0.000206	0.0591	AQGAIAMASIAK	0.997	30.7	25	27.1	1	0	0	1131.62	1545	1556
Proteasome-associated protein ECM29 homolog GN=ECM29	ECM29_HUMAN	204.296	1	9	9	15	0.000206	0.0591	AIACVVTACSAELEK	0.997	54.9	25	53.9	3	0	0	1621.79	1591	1605
Proteasome-associated protein ECM29 homolog GN=ECM29	ECM29_HUMAN	204.296	1	9	9	15	0.000206	0.0591	IVAISCAADILK	0.966	22.1	25	22.1	1	0	0	1273.72	1633	1644
Proteasome-associated protein ECM29 homolog GN=ECM29	ECM29_HUMAN	204.296	1	9	9	15	0.000206	0.0591	NSLESSGVR	0.996	29.7	25	22.8	1	0	0	948.474	1665	1673
Putative elongation factor 1-alpha-like 3 GN=EEF1A1P5	EF1A3_HUMAN	50.1854	1	14	19	134	0.00184	0.344	THINIVVIGHVDSGK	0.997	87.6	25	84.9	5	17	0	1588.88	6	20
Putative elongation factor 1-alpha-like 3 GN=EEF1A1P5	EF1A3_HUMAN	50.1854	1	14	19	134	0.00184	0.344	STTTGHLIYK	0.997	46.9	25	35.8	21	0	0	1120.6	21	30
Putative elongation factor 1-alpha-like 3 GN=EEF1A1P5	EF1A3_HUMAN	50.1854	1	14	19	134	0.00184	0.344	TIEKFEK	0.995	27.8	25	17.1	5	0	0	894.493	38	44
Putative elongation factor 1-alpha-like 3 GN=EEF1A1P5	EF1A3_HUMAN	50.1854	1	14	19	134	0.00184	0.344	FEKEAAEMGK	0.992	27.5	25	18.5	1	0	0	1139.54	42	51
Putative elongation factor 1-alpha-like 3 GN=EEF1A1P5	EF1A3_HUMAN	50.1854	1	14	19	134	0.00184	0.344	EHALLAYTLGVK	0.997	67.9	25	61.4	11	3	0	1314.74	135	146
Putative elongation factor 1-alpha-like 3 GN=EEF1A1P5	EF1A3_HUMAN	50.1854	1	14	19	134	0.00184	0.344	QLIVGVNK	0.997	32.8	25	22.6	6	0	0	870.541	147	154
Putative elongation factor 1-alpha-like 3 GN=EEF1A1P5	EF1A3_HUMAN	50.1854	1	14	19	134	0.00184	0.344	EVSTYIKK	0.981	22.8	25	15.5	4	0	0	967.546	173	180
Putative elongation factor 1-alpha-like 3 GN=EEF1A1P5	EF1A3_HUMAN	50.1854	1	14	19	134	0.00184	0.344	LPLQDVYK	0.997	49.1	25	37.8	4	0	0	975.551	248	255
Putative elongation factor 1-alpha-like 3 GN=EEF1A1P5	EF1A3_HUMAN	50.1854	1	14	19	134	0.00184	0.344	IGGIGTVPVGR	0.997	80.2	25	74.9	31	0	0	1025.61	256	266
Putative elongation factor 1-alpha-like 3 GN=EEF1A1P5	EF1A3_HUMAN	50.1854	1	14	19	134	0.00184	0.344	VETGVLKPGMVVTFAPVNVTTEVK	0.997	31.7	25	31.7	0	11	0	2531.38	267	290
Putative elongation factor 1-alpha-like 3 GN=EEF1A1P5	EF1A3_HUMAN	50.1854	1	14	19	134	0.00184	0.344	SGDAAIVDMVPGKPMCVESFSDYPPLGR	0.997	29	25	29	0	2	0	3027.39	396	423
Putative elongation factor 1-alpha-like 3 GN=EEF1A1P5	EF1A3_HUMAN	50.1854	1	14	19	134	0.00184	0.344	DMRQTVAVGVIK	0.997	52.6	25	43.5	4	2	0	1316.74	428	439
Putative elongation factor 1-alpha-like 3 GN=EEF1A1P5	EF1A3_HUMAN	50.1854	1	14	19	134	0.00184	0.344	QTVAVGVIK	0.997	46.4	25	35	5	0	0	914.567	431	439
Putative elongation factor 1-alpha-like 3 GN=EEF1A1P5	EF1A3_HUMAN	50.1854	1	14	19	134	0.00184	0.344	AAGAGKVTK	0.997	35.1	25	30.9	2	0	0	802.478	445	453
Elongation factor 1-delta GN=EEF1D	EF1D_HUMAN	31.1219	1	2	3	7	9.62e-05	0.132	SLAGSSGPGASSGTSGDHGELVVR	0.997	45.9	25	45.9	0	4	0	2185.05	60	83
Elongation factor 1-delta GN=EEF1D	EF1D_HUMAN	31.1219	1	2	3	7	9.62e-05	0.132	ATAPQTQHVSPMR	0.997	42.4	25	30.4	3	0	0	1423.71	124	136
Elongation factor 1-gamma GN=EEF1G	EF1G_HUMAN	50.1194	1	12	13	25	0.000343	0.215	AFKALIAAQYSGAQVR	0.997	58.4	25	54.8	0	2	0	1693.94	15	30
Elongation factor 1-gamma GN=EEF1G	EF1G_HUMAN	50.1194	1	12	13	25	0.000343	0.215	ALIAAQYSGAQVR	0.997	87.1	25	84.6	2	0	0	1347.74	18	30
Elongation factor 1-gamma GN=EEF1G	EF1G_HUMAN	50.1194	1	12	13	25	0.000343	0.215	ILGLLDAYLK	0.997	38.6	25	38.3	2	0	0	1118.68	138	147
Elongation factor 1-gamma GN=EEF1G	EF1G_HUMAN	50.1194	1	12	13	25	0.000343	0.215	ILGLLDAYLKTR	0.997	43.1	25	19.2	2	0	0	1375.83	138	149
Elongation factor 1-gamma GN=EEF1G	EF1G_HUMAN	50.1194	1	12	13	25	0.000343	0.215	TFLVGER	0.993	26.1	25	15.7	2	0	0	821.452	150	156
Elongation factor 1-gamma GN=EEF1G	EF1G_HUMAN	50.1194	1	12	13	25	0.000343	0.215	AVLGEVKLCEK	0.997	58	25	54.8	2	0	0	1245.69	202	212
Elongation factor 1-gamma GN=EEF1G	EF1G_HUMAN	50.1194	1	12	13	25	0.000343	0.215	MAQFDAK	0.966	20.7	25	15.2	1	0	0	810.381	213	219
Elongation factor 1-gamma GN=EEF1G	EF1G_HUMAN	50.1194	1	12	13	25	0.000343	0.215	KFAETQPK	0.99	26.6	25	11.9	2	0	0	948.515	220	227
Elongation factor 1-gamma GN=EEF1G	EF1G_HUMAN	50.1194	1	12	13	25	0.000343	0.215	FAETQPK	0.997	32	25	15	2	0	0	820.42	221	227
Elongation factor 1-gamma GN=EEF1G	EF1G_HUMAN	50.1194	1	12	13	25	0.000343	0.215	STFVLDEFKR	0.997	48.7	25	44.9	2	0	0	1241.65	286	295
Elongation factor 1-gamma GN=EEF1G	EF1G_HUMAN	50.1194	1	12	13	25	0.000343	0.215	KLDPGSEETQTLVR	0.997	65.8	25	59.4	2	2	0	1572.82	401	414
Elongation factor 1-gamma GN=EEF1G	EF1G_HUMAN	50.1194	1	12	13	25	0.000343	0.215	AFNQGKIFK	0.997	28.9	25	24.3	2	0	0	1052.59	429	437
Elongation factor 2 GN=EEF2	EF2_HUMAN	95.3401	1	14	17	51	0.000701	0.161	VNFTVDQIR	0.997	75.6	25	60.4	3	0	0	1091.58	2	10
Elongation factor 2 GN=EEF2	EF2_HUMAN	95.3401	1	14	17	51	0.000701	0.161	STLTDSLVCK	0.997	55	25	54.4	2	0	0	1123.57	33	42
Elongation factor 2 GN=EEF2	EF2_HUMAN	95.3401	1	14	17	51	0.000701	0.161	FAAKGEGQLGPAER	0.997	52.9	25	52.9	2	2	0	1430.74	236	249
Elongation factor 2 GN=EEF2	EF2_HUMAN	95.3401	1	14	17	51	0.000701	0.161	GEGQLGPAER	0.997	31.3	25	23.2	2	0	0	1013.5	240	249
Elongation factor 2 GN=EEF2	EF2_HUMAN	95.3401	1	14	17	51	0.000701	0.161	VFSGLVSTGLK	0.997	45.2	25	37.9	2	0	0	1107.64	416	426
Elongation factor 2 GN=EEF2	EF2_HUMAN	95.3401	1	14	17	51	0.000701	0.161	VFSGLVSTGLKVR	0.997	70.9	25	70.9	4	0	0	1362.81	416	428
Elongation factor 2 GN=EEF2	EF2_HUMAN	95.3401	1	14	17	51	0.000701	0.161	VAVEAKNPADLPK	0.997	43.6	25	41	3	2	0	1351.76	507	519
Elongation factor 2 GN=EEF2	EF2_HUMAN	95.3401	1	14	17	51	0.000701	0.161	SDPVVSYRETVSEESNVLCLSK	0.989	21.8	25	21.8	0	1	0	2498.21	573	594
Elongation factor 2 GN=EEF2	EF2_HUMAN	95.3401	1	14	17	51	0.000701	0.161	GGGQIIPTAR	0.997	38.4	25	32.1	5	0	0	969.548	717	726
Elongation factor 2 GN=EEF2	EF2_HUMAN	95.3401	1	14	17	51	0.000701	0.161	GGGQIIPTARR	0.979	22.5	25	3.1	2	0	0	1125.65	717	727
Elongation factor 2 GN=EEF2	EF2_HUMAN	95.3401	1	14	17	51	0.000701	0.161	RCLYASVLTAQPR	0.997	38.5	25	38.5	2	3	0	1534.82	727	739
Elongation factor 2 GN=EEF2	EF2_HUMAN	95.3401	1	14	17	51	0.000701	0.161	CLYASVLTAQPR	0.997	67.6	25	63.4	10	0	0	1378.71	728	739
Elongation factor 2 GN=EEF2	EF2_HUMAN	95.3401	1	14	17	51	0.000701	0.161	GHVFEESQVAGTPMFVVK	0.975	17.3	25	17.3	0	2	0	1961.98	768	785
Elongation factor 2 GN=EEF2	EF2_HUMAN	95.3401	1	14	17	51	0.000701	0.161	AYLPVNESFGFTADLR	0.997	59.9	25	59.9	4	0	0	1799.9	786	801
Elongation factor Tu, mitochondrial GN=TUFM	EFTU_HUMAN	49.5424	1	19	28	114	0.00157	0.398	ILAEGGGAK	0.997	38.3	25	26.8	1	0	0	815.462	80	88
Elongation factor Tu, mitochondrial GN=TUFM	EFTU_HUMAN	49.5424	1	19	28	114	0.00157	0.398	ILAEGGGAKFK	0.996	30.1	25	15.4	1	0	0	1090.63	80	90
Elongation factor Tu, mitochondrial GN=TUFM	EFTU_HUMAN	49.5424	1	19	28	114	0.00157	0.398	KYEEIDNAPEER	0.997	74.6	25	74.6	2	1	0	1492.69	91	102
Elongation factor Tu, mitochondrial GN=TUFM	EFTU_HUMAN	49.5424	1	19	28	114	0.00157	0.398	YEEIDNAPEERAR	0.997	35.5	25	35.5	3	2	0	1591.73	92	104
Elongation factor Tu, mitochondrial GN=TUFM	EFTU_HUMAN	49.5424	1	19	28	114	0.00157	0.398	ARGITINAAHVEYSTAAR	0.997	22.7	25	19.8	0	2	0	1901	103	120
Elongation factor Tu, mitochondrial GN=TUFM	EFTU_HUMAN	49.5424	1	19	28	114	0.00157	0.398	GITINAAHVEYSTAAR	0.997	59.1	25	51.8	5	5	0	1673.86	105	120
Elongation factor Tu, mitochondrial GN=TUFM	EFTU_HUMAN	49.5424	1	19	28	114	0.00157	0.398	EHLLLAR	0.997	36.6	25	36.6	7	0	0	851.51	163	169
Elongation factor Tu, mitochondrial GN=TUFM	EFTU_HUMAN	49.5424	1	19	28	114	0.00157	0.398	QIGVEHVVVYVNK	0.997	34.7	25	26.8	2	1	0	1483.83	170	182
Elongation factor Tu, mitochondrial GN=TUFM	EFTU_HUMAN	49.5424	1	19	28	114	0.00157	0.398	LLDAVDTYIPVPAR	0.997	59.1	25	59.1	6	0	0	1542.85	239	252
Elongation factor Tu, mitochondrial GN=TUFM	EFTU_HUMAN	49.5424	1	19	28	114	0.00157	0.398	DLEKPFLLPVEAVYSVPGR	0.948	14.7	25	14.4	0	1	0	2129.16	253	271
Elongation factor Tu, mitochondrial GN=TUFM	EFTU_HUMAN	49.5424	1	19	28	114	0.00157	0.398	GTVVTGTLER	0.997	64.5	25	45.6	11	0	0	1032.57	272	281
Elongation factor Tu, mitochondrial GN=TUFM	EFTU_HUMAN	49.5424	1	19	28	114	0.00157	0.398	GTVVTGTLERGILK	0.983	25.8	25	23	2	0	0	1443.85	272	285
Elongation factor Tu, mitochondrial GN=TUFM	EFTU_HUMAN	49.5424	1	19	28	114	0.00157	0.398	KGDECELLGHSK	0.997	38.1	25	27.7	2	3	0	1372.65	286	297
Elongation factor Tu, mitochondrial GN=TUFM	EFTU_HUMAN	49.5424	1	19	28	114	0.00157	0.398	TVVTGIEMFHK	0.997	69	25	47.7	13	4	0	1261.66	301	311
Elongation factor Tu, mitochondrial GN=TUFM	EFTU_HUMAN	49.5424	1	19	28	114	0.00157	0.398	SLERAEAGDNLGALVR	0.997	60.4	25	55	6	7	0	1670.88	312	327
Elongation factor Tu, mitochondrial GN=TUFM	EFTU_HUMAN	49.5424	1	19	28	114	0.00157	0.398	AEAGDNLGALVR	0.997	92.1	25	74.7	6	0	0	1185.62	316	327
Elongation factor Tu, mitochondrial GN=TUFM	EFTU_HUMAN	49.5424	1	19	28	114	0.00157	0.398	VEAQVYILSK	0.997	69.5	25	64.7	7	0	0	1149.65	352	361
Elongation factor Tu, mitochondrial GN=TUFM	EFTU_HUMAN	49.5424	1	19	28	114	0.00157	0.398	VEAQVYILSKEEGGR	0.997	80.6	25	80.6	6	6	0	1677.88	352	366
Elongation factor Tu, mitochondrial GN=TUFM	EFTU_HUMAN	49.5424	1	19	28	114	0.00157	0.398	TIGTGLVTNTLAMTEEEK	0.997	37	25	37	2	0	0	1907.96	430	447
EH domain-containing protein 1 GN=EHD1	EHD1_HUMAN	60.6291	0.998	2	2	2	2.75e-05	0.0487	LNAFGNAFLNR	0.997	33.1	25	23.7	1	0	0	1236.65	125	135
EH domain-containing protein 1 GN=EHD1	EHD1_HUMAN	60.6291	0.998	2	2	2	2.75e-05	0.0487	LLDTVDDMLANDIAR	0.997	95.3	25	93	1	0	0	1674.84	378	392
EH domain-containing protein 4 GN=EHD4	EHD4_HUMAN	61.1776	1	3	4	5	6.87e-05	0.0813	AGGADAVQTVTGGLR	0.997	66.8	25	64.3	2	0	0	1372.72	15	29
EH domain-containing protein 4 GN=EHD4	EHD4_HUMAN	61.1776	1	3	4	5	6.87e-05	0.0813	FMCSQLPNQVLK	0.974	21.2	25	18.8	1	0	0	1464.73	139	150
EH domain-containing protein 4 GN=EHD4	EHD4_HUMAN	61.1776	1	3	4	5	6.87e-05	0.0813	SISVIDSPGILSGEKQR	0.997	64.4	25	61.1	1	1	0	1785.97	151	167
Translation initiation factor eIF-2B subunit beta GN=EIF2B2	EI2BB_HUMAN	38.9901	1	3	3	5	6.87e-05	0.108	SSEEMARETLGLLR	0.988	25.2	25	24.4	2	0	0	1591.81	30	43
Translation initiation factor eIF-2B subunit beta GN=EIF2B2	EI2BB_HUMAN	38.9901	1	3	3	5	6.87e-05	0.108	TVEAFLKEAAR	0.997	53.3	25	51.8	2	0	0	1234.68	173	183
Translation initiation factor eIF-2B subunit beta GN=EIF2B2	EI2BB_HUMAN	38.9901	1	3	3	5	6.87e-05	0.108	AVTGTHTLALAAK	0.997	48.9	25	42.2	1	0	0	1253.72	247	259
Translation initiation factor eIF-2B subunit delta GN=EIF2B4	EI2BD_HUMAN	57.5569	0.999	2	2	2	2.75e-05	0.0516	LGLQYSQGLVSGSNAR	0.997	69.5	25	64.2	1	0	0	1649.86	210	225
Translation initiation factor eIF-2B subunit delta GN=EIF2B4	EI2BD_HUMAN	57.5569	0.999	2	2	2	2.75e-05	0.0516	VGTAQLALVAR	0.997	64.4	25	51	1	0	0	1098.66	418	428
Translation initiation factor eIF-2B subunit epsilon GN=EIF2B5	EI2BE_HUMAN	80.3801	1	4	4	5	6.87e-05	0.068	AAQIKEHLLK	0.972	21.4	25	17.8	1	0	0	1150.69	99	108
Translation initiation factor eIF-2B subunit epsilon GN=EIF2B5	EI2BE_HUMAN	80.3801	1	4	4	5	6.87e-05	0.068	IITSELYR	0.997	36.5	25	26.1	1	0	0	994.557	122	129
Translation initiation factor eIF-2B subunit epsilon GN=EIF2B5	EI2BE_HUMAN	80.3801	1	4	4	5	6.87e-05	0.068	VAAGAQIHQSLLCDNAEVKER	0.997	38.2	25	38.2	0	1	0	2309.17	402	422
Translation initiation factor eIF-2B subunit epsilon GN=EIF2B5	EI2BE_HUMAN	80.3801	1	4	4	5	6.87e-05	0.068	YCALLLPLLK	0.997	36.9	25	36.9	2	0	0	1203.72	617	626
Translation initiation factor eIF-2B subunit gamma GN=EIF2B3	EI2BG_HUMAN	50.2413	0.998	2	2	2	2.75e-05	0.0487	KGQDSIEPVPGQK	0.997	44.8	25	44	1	0	0	1382.73	134	146
Translation initiation factor eIF-2B subunit gamma GN=EIF2B3	EI2BG_HUMAN	50.2413	0.998	2	2	2	2.75e-05	0.0487	SELIPYLVR	0.985	25	25	25	1	0	0	1089.63	226	234
Eukaryotic translation initiation factor 3 subunit A GN=EIF3A	EIF3A_HUMAN	166.575	1	21	25	49	0.000673	0.137	PAYFQRPENALKR	0.997	25.8	25	22.5	1	2	0	1589.85	2	14
Eukaryotic translation initiation factor 3 subunit A GN=EIF3A	EIF3A_HUMAN	166.575	1	21	25	49	0.000673	0.137	ANEFLEVGK	0.997	35.2	25	27	2	0	0	1006.52	15	23
Eukaryotic translation initiation factor 3 subunit A GN=EIF3A	EIF3A_HUMAN	166.575	1	21	25	49	0.000673	0.137	ANEFLEVGKK	0.958	20	25	14.3	1	0	0	1134.62	15	24
Eukaryotic translation initiation factor 3 subunit A GN=EIF3A	EIF3A_HUMAN	166.575	1	21	25	49	0.000673	0.137	YLELCVDLRK	0.997	33.6	25	31.4	2	0	0	1308.7	54	63
Eukaryotic translation initiation factor 3 subunit A GN=EIF3A	EIF3A_HUMAN	166.575	1	21	25	49	0.000673	0.137	NLTQDEMQR	0.997	34.2	25	26.5	2	0	0	1134.52	309	317
Eukaryotic translation initiation factor 3 subunit A GN=EIF3A	EIF3A_HUMAN	166.575	1	21	25	49	0.000673	0.137	VLLATLSIPITPER	0.997	42.4	25	42.4	4	0	0	1522.92	322	335
Eukaryotic translation initiation factor 3 subunit A GN=EIF3A	EIF3A_HUMAN	166.575	1	21	25	49	0.000673	0.137	VLLATLSIPITPERTDIAR	0.997	40.8	25	40.8	0	4	0	2079.22	322	340
Eukaryotic translation initiation factor 3 subunit A GN=EIF3A	EIF3A_HUMAN	166.575	1	21	25	49	0.000673	0.137	LLDMDGIIVEK	0.997	48.9	25	44.3	3	0	0	1245.68	341	351
Eukaryotic translation initiation factor 3 subunit A GN=EIF3A	EIF3A_HUMAN	166.575	1	21	25	49	0.000673	0.137	LLDMDGIIVEKQR	0.968	22.3	25	20.1	1	0	0	1529.84	341	353
Eukaryotic translation initiation factor 3 subunit A GN=EIF3A	EIF3A_HUMAN	166.575	1	21	25	49	0.000673	0.137	RLATLLGLQAPPTR	0.991	20.5	25	20.2	0	2	0	1506.91	354	367
Eukaryotic translation initiation factor 3 subunit A GN=EIF3A	EIF3A_HUMAN	166.575	1	21	25	49	0.000673	0.137	LATLLGLQAPPTR	0.997	40.5	25	40.5	3	0	0	1350.81	355	367
Eukaryotic translation initiation factor 3 subunit A GN=EIF3A	EIF3A_HUMAN	166.575	1	21	25	49	0.000673	0.137	IGLINDMVR	0.997	35.8	25	33.3	6	0	0	1046.57	368	376
Eukaryotic translation initiation factor 3 subunit A GN=EIF3A	EIF3A_HUMAN	166.575	1	21	25	49	0.000673	0.137	LTSLVPFVDAFQLER	0.986	24.7	25	24.7	1	0	0	1734.94	455	469
Eukaryotic translation initiation factor 3 subunit A GN=EIF3A	EIF3A_HUMAN	166.575	1	21	25	49	0.000673	0.137	TLSFGSDLNYATR	0.997	66	25	57.8	2	0	0	1444.71	490	502
Eukaryotic translation initiation factor 3 subunit A GN=EIF3A	EIF3A_HUMAN	166.575	1	21	25	49	0.000673	0.137	NQLTAMSSVLAK	0.997	48.6	25	45.5	4	0	0	1262.68	521	532
Eukaryotic translation initiation factor 3 subunit A GN=EIF3A	EIF3A_HUMAN	166.575	1	21	25	49	0.000673	0.137	LESLNIQR	0.997	33	25	16.8	1	0	0	972.547	582	589
Eukaryotic translation initiation factor 3 subunit A GN=EIF3A	EIF3A_HUMAN	166.575	1	21	25	49	0.000673	0.137	ILQEHEQIKK	0.996	28.7	25	20.9	1	0	0	1265.72	624	633
Eukaryotic translation initiation factor 3 subunit A GN=EIF3A	EIF3A_HUMAN	166.575	1	21	25	49	0.000673	0.137	KIDYFER	0.989	24.9	25	9.77	2	0	0	970.499	694	700
Eukaryotic translation initiation factor 3 subunit A GN=EIF3A	EIF3A_HUMAN	166.575	1	21	25	49	0.000673	0.137	RLEEIPLIK	0.996	29.3	25	28.8	1	0	0	1110.69	703	711
Eukaryotic translation initiation factor 3 subunit A GN=EIF3A	EIF3A_HUMAN	166.575	1	21	25	49	0.000673	0.137	RLGDSSLSR	0.992	27.7	25	18.1	2	0	0	990.533	877	885
Eukaryotic translation initiation factor 3 subunit A GN=EIF3A	EIF3A_HUMAN	166.575	1	21	25	49	0.000673	0.137	NTDDDRPPRR	0.997	22.4	25	22.4	0	2	0	1241.6	991	1000
Eukaryotic translation initiation factor 3 subunit B GN=EIF3B	EIF3B_HUMAN	92.4828	1	11	11	29	0.000398	0.136	AQAVSEDAGGNEGRAAEAEPR	0.997	43.9	25	43.9	0	2	0	2084.96	121	141
Eukaryotic translation initiation factor 3 subunit B GN=EIF3B	EIF3B_HUMAN	92.4828	1	11	11	29	0.000398	0.136	GTYLATFHQR	0.997	65.7	25	56.7	4	0	0	1193.61	346	355
Eukaryotic translation initiation factor 3 subunit B GN=EIF3B	EIF3B_HUMAN	92.4828	1	11	11	29	0.000398	0.136	FSHQGVQLIDFSPCER	0.997	23.2	25	23.2	0	4	0	1919.91	371	386
Eukaryotic translation initiation factor 3 subunit B GN=EIF3B	EIF3B_HUMAN	92.4828	1	11	11	29	0.000398	0.136	VTLMQLPTR	0.997	31.9	25	28.4	1	0	0	1058.6	493	501
Eukaryotic translation initiation factor 3 subunit B GN=EIF3B	EIF3B_HUMAN	92.4828	1	11	11	29	0.000398	0.136	VTLMQLPTRQEIR	0.994	19.1	25	16.9	0	3	0	1584.89	493	505
Eukaryotic translation initiation factor 3 subunit B GN=EIF3B	EIF3B_HUMAN	92.4828	1	11	11	29	0.000398	0.136	TPKGTQGVVTNFEIFR	0.997	29.9	25	29.9	0	2	0	1793.95	533	548
Eukaryotic translation initiation factor 3 subunit B GN=EIF3B	EIF3B_HUMAN	92.4828	1	11	11	29	0.000398	0.136	GTQGVVTNFEIFR	0.997	75.5	25	71.5	6	0	0	1467.76	536	548
Eukaryotic translation initiation factor 3 subunit B GN=EIF3B	EIF3B_HUMAN	92.4828	1	11	11	29	0.000398	0.136	FAVLHGEAPR	0.997	48.6	25	43.4	2	0	0	1096.59	577	586
Eukaryotic translation initiation factor 3 subunit B GN=EIF3B	EIF3B_HUMAN	92.4828	1	11	11	29	0.000398	0.136	ISVSFYHVK	0.989	24.2	25	19.7	2	0	0	1079.59	587	595
Eukaryotic translation initiation factor 3 subunit B GN=EIF3B	EIF3B_HUMAN	92.4828	1	11	11	29	0.000398	0.136	ASKELVER	0.997	56.6	25	42.1	2	0	0	931.521	742	749
Eukaryotic translation initiation factor 3 subunit B GN=EIF3B	EIF3B_HUMAN	92.4828	1	11	11	29	0.000398	0.136	TMMEDFRK	0.98	22.6	25	15.3	1	0	0	1057.48	752	759
Eukaryotic translation initiation factor 3 subunit C GN=EIF3C	EIF3C_HUMAN	105.476	0.998	2	3	7	9.62e-05	0.0131	AKELLGQGLLLR	0.997	39.5	25	39.5	3	3	0	1310.82	643	654
Eukaryotic translation initiation factor 3 subunit C GN=EIF3C	EIF3C_HUMAN	105.476	0.998	2	3	7	9.62e-05	0.0131	ELLGQGLLLR	0.986	30	25	26.7	1	0	0	1111.68	645	654
Eukaryotic translation initiation factor 3 subunit D GN=EIF3D	EIF3D_HUMAN	63.9738	1	5	8	17	0.000234	0.104	NMLQFNLQILPK	0.997	58.9	25	56.5	6	0	0	1458.81	113	124
Eukaryotic translation initiation factor 3 subunit D GN=EIF3D	EIF3D_HUMAN	63.9738	1	5	8	17	0.000234	0.104	IFHTVTTTDDPVIR	0.997	30.3	25	30.3	2	2	0	1614.85	223	236
Eukaryotic translation initiation factor 3 subunit D GN=EIF3D	EIF3D_HUMAN	63.9738	1	5	8	17	0.000234	0.104	IFHTVTTTDDPVIRK	0.997	34.2	25	28.4	0	2	0	1742.94	223	237
Eukaryotic translation initiation factor 3 subunit D GN=EIF3D	EIF3D_HUMAN	63.9738	1	5	8	17	0.000234	0.104	SVYSWDIVVQR	0.997	66.2	25	64.4	2	0	0	1351.7	261	271
Eukaryotic translation initiation factor 3 subunit D GN=EIF3D	EIF3D_HUMAN	63.9738	1	5	8	17	0.000234	0.104	NLAMEATYINHNFSQQCLR	0.997	60	25	60	0	3	0	2310.08	311	329
Eukaryotic translation initiation factor 3 subunit E GN=EIF3E	EIF3E_HUMAN	52.2226	1	13	17	34	0.000467	0.276	RTTVVAQLK	0.986	24	25	19	2	0	0	1015.63	74	82
Eukaryotic translation initiation factor 3 subunit E GN=EIF3E	EIF3E_HUMAN	52.2226	1	13	17	34	0.000467	0.276	TTVVAQLK	0.995	27.7	25	15.2	2	0	0	859.525	75	82
Eukaryotic translation initiation factor 3 subunit E GN=EIF3E	EIF3E_HUMAN	52.2226	1	13	17	34	0.000467	0.276	TTVVAQLKQLQAETEPIVK	0.997	41.2	25	41.2	0	2	0	2096.2	75	93
Eukaryotic translation initiation factor 3 subunit E GN=EIF3E	EIF3E_HUMAN	52.2226	1	13	17	34	0.000467	0.276	QLQAETEPIVK	0.997	61.8	25	46.8	2	0	0	1255.69	83	93
Eukaryotic translation initiation factor 3 subunit E GN=EIF3E	EIF3E_HUMAN	52.2226	1	13	17	34	0.000467	0.276	MFEDPETTR	0.997	39.9	25	26	3	0	0	1125.49	94	102
Eukaryotic translation initiation factor 3 subunit E GN=EIF3E	EIF3E_HUMAN	52.2226	1	13	17	34	0.000467	0.276	VLVPATDR	0.988	23.9	25	23.9	1	0	0	870.504	156	163
Eukaryotic translation initiation factor 3 subunit E GN=EIF3E	EIF3E_HUMAN	52.2226	1	13	17	34	0.000467	0.276	LKETIDNNSVSSPLQSLQQR	0.997	39.7	25	30.2	0	2	0	2257.18	192	211
Eukaryotic translation initiation factor 3 subunit E GN=EIF3E	EIF3E_HUMAN	52.2226	1	13	17	34	0.000467	0.276	YLTTAVITNKDVR	0.997	60.7	25	54.3	4	1	0	1493.83	256	268
Eukaryotic translation initiation factor 3 subunit E GN=EIF3E	EIF3E_HUMAN	52.2226	1	13	17	34	0.000467	0.276	LGHVVMGNNAVSPYQQVIEK	0.997	33.8	25	33.8	0	4	0	2199.12	388	407
Eukaryotic translation initiation factor 3 subunit E GN=EIF3E	EIF3E_HUMAN	52.2226	1	13	17	34	0.000467	0.276	LGHVVMGNNAVSPYQQVIEKTK	0.996	26.1	25	21.8	0	2	0	2428.27	388	409
Eukaryotic translation initiation factor 3 subunit E GN=EIF3E	EIF3E_HUMAN	52.2226	1	13	17	34	0.000467	0.276	SQMLAMNIEK	0.997	45.6	25	38.9	5	0	0	1164.58	415	424
Eukaryotic translation initiation factor 3 subunit E GN=EIF3E	EIF3E_HUMAN	52.2226	1	13	17	34	0.000467	0.276	KLNQNSR	0.977	22.1	25	5.71	2	0	0	859.474	425	431
Eukaryotic translation initiation factor 3 subunit E GN=EIF3E	EIF3E_HUMAN	52.2226	1	13	17	34	0.000467	0.276	SEAPNWATQDSGFY	0.997	30.6	25	30.6	2	0	0	1572.66	432	445
Eukaryotic translation initiation factor 3 subunit F GN=EIF3F	EIF3F_HUMAN	37.5635	1	3	3	5	6.87e-05	0.115	AYVSTLMGVPGR	0.997	33.5	25	33.5	2	0	0	1250.66	215	226
Eukaryotic translation initiation factor 3 subunit F GN=EIF3F	EIF3F_HUMAN	37.5635	1	3	3	5	6.87e-05	0.115	TMGVMFTPLTVK	0.959	20.6	25	9.35	1	0	0	1340.7	227	238
Eukaryotic translation initiation factor 3 subunit F GN=EIF3F	EIF3F_HUMAN	37.5635	1	3	3	5	6.87e-05	0.115	VIGLSSDLQQVGGASAR	0.997	94.5	25	94.5	2	0	0	1657.89	262	278
Eukaryotic translation initiation factor 3 subunit G GN=EIF3G	EIF3G_HUMAN	35.612	1	3	3	9	0.000124	0.0875	YVPPSLRDGASR	0.986	24.7	25	18.5	3	0	0	1317.69	213	224
Eukaryotic translation initiation factor 3 subunit G GN=EIF3G	EIF3G_HUMAN	35.612	1	3	3	9	0.000124	0.0875	RADDNATIR	0.997	47.5	25	28.5	5	0	0	1031.52	234	242
Eukaryotic translation initiation factor 3 subunit G GN=EIF3G	EIF3G_HUMAN	35.612	1	3	3	9	0.000124	0.0875	IYLAKDK	0.962	21.6	25	3.97	1	0	0	850.503	268	274
Eukaryotic translation initiation factor 3 subunit H GN=EIF3H	EIF3H_HUMAN	39.9306	1	4	4	4	5.49e-05	0.0966	KEGTGSTATSSSSTAGAAGK	0.995	26.2	25	26.2	0	1	0	1755.84	5	24
Eukaryotic translation initiation factor 3 subunit H GN=EIF3H	EIF3H_HUMAN	39.9306	1	4	4	4	5.49e-05	0.0966	EGTGSTATSSSSTAGAAGK	0.997	33.7	25	29.6	1	0	0	1627.74	6	24
Eukaryotic translation initiation factor 3 subunit H GN=EIF3H	EIF3H_HUMAN	39.9306	1	4	4	4	5.49e-05	0.0966	EGTGSTATSSSSTAGAAGKGK	0.988	18.7	25	17.9	0	1	0	1812.86	6	26
Eukaryotic translation initiation factor 3 subunit H GN=EIF3H	EIF3H_HUMAN	39.9306	1	4	4	4	5.49e-05	0.0966	LFMAQALQEYNN	0.995	30.4	25	30.4	1	0	0	1441.68	341	352
Eukaryotic translation initiation factor 3 subunit I GN=EIF3I	EIF3I_HUMAN	36.502	1	10	12	33	0.000453	0.363	SITQIKYNR	0.997	47.3	25	41	4	0	0	1122.63	12	20
Eukaryotic translation initiation factor 3 subunit I GN=EIF3I	EIF3I_HUMAN	36.502	1	10	12	33	0.000453	0.363	HVLTGSADNSCR	0.99	25.1	25	25.1	1	0	0	1316.6	66	77
Eukaryotic translation initiation factor 3 subunit I GN=EIF3I	EIF3I_HUMAN	36.502	1	10	12	33	0.000453	0.363	LWDCETGKQLALLK	0.975	18.4	25	15.8	0	1	0	1674.89	78	91
Eukaryotic translation initiation factor 3 subunit I GN=EIF3I	EIF3I_HUMAN	36.502	1	10	12	33	0.000453	0.363	SGEVLVNVKEHSR	0.997	75.7	25	61.9	3	6	0	1453.78	177	189
Eukaryotic translation initiation factor 3 subunit I GN=EIF3I	EIF3I_HUMAN	36.502	1	10	12	33	0.000453	0.363	QINDIQLSR	0.997	49.1	25	10.6	2	0	0	1086.59	190	198
Eukaryotic translation initiation factor 3 subunit I GN=EIF3I	EIF3I_HUMAN	36.502	1	10	12	33	0.000453	0.363	DMTMFVTASKDNTAK	0.997	63.5	25	63.5	2	0	0	1659.77	199	213
Eukaryotic translation initiation factor 3 subunit I GN=EIF3I	EIF3I_HUMAN	36.502	1	10	12	33	0.000453	0.363	LFDSTTLEHQK	0.997	50.9	25	34.7	2	2	0	1318.66	214	224
Eukaryotic translation initiation factor 3 subunit I GN=EIF3I	EIF3I_HUMAN	36.502	1	10	12	33	0.000453	0.363	IGKFEAR	0.997	46.5	25	28.9	3	0	0	820.468	262	268
Eukaryotic translation initiation factor 3 subunit I GN=EIF3I	EIF3I_HUMAN	36.502	1	10	12	33	0.000453	0.363	GHFGPINSVAFHPDGK	0.997	20.9	25	20.9	0	1	0	1679.83	283	298
Eukaryotic translation initiation factor 3 subunit I GN=EIF3I	EIF3I_HUMAN	36.502	1	10	12	33	0.000453	0.363	SYSSGGEDGYVR	0.997	55.7	25	55.7	6	0	0	1276.54	299	310
Eukaryotic translation initiation factor 3 subunit K GN=EIF3K	EIF3K_HUMAN	25.0605	0.998	2	3	5	6.87e-05	0.133	GIDRYNPENLATLER	0.997	52	25	52	2	2	0	1760.89	17	31
Eukaryotic translation initiation factor 3 subunit K GN=EIF3K	EIF3K_HUMAN	25.0605	0.998	2	3	5	6.87e-05	0.133	ALTNLPHTDFTLCK	0.997	57.9	25	56.5	1	0	0	1630.83	73	86
Eukaryotic translation initiation factor 3 subunit L GN=EIF3L	EIF3L_HUMAN	66.7293	1	10	12	27	0.000371	0.183	TVSDLIDQKVYELQASR	0.997	52.7	25	50.5	2	2	0	1965.03	62	78
Eukaryotic translation initiation factor 3 subunit L GN=EIF3L	EIF3L_HUMAN	66.7293	1	10	12	27	0.000371	0.183	KSEEEIDFLR	0.997	49.6	25	41.1	3	0	0	1265.64	207	216
Eukaryotic translation initiation factor 3 subunit L GN=EIF3L	EIF3L_HUMAN	66.7293	1	10	12	27	0.000371	0.183	SEEEIDFLR	0.997	54.2	25	45.9	2	0	0	1137.54	208	216
Eukaryotic translation initiation factor 3 subunit L GN=EIF3L	EIF3L_HUMAN	66.7293	1	10	12	27	0.000371	0.183	QLEVYTSGGDPESVAGEYGR	0.997	91	25	91	2	0	0	2113.97	243	262
Eukaryotic translation initiation factor 3 subunit L GN=EIF3L	EIF3L_HUMAN	66.7293	1	10	12	27	0.000371	0.183	VLENIELNKK	0.954	13.8	25	12.5	0	1	0	1199.7	293	302
Eukaryotic translation initiation factor 3 subunit L GN=EIF3L	EIF3L_HUMAN	66.7293	1	10	12	27	0.000371	0.183	VFSDEVQQQAQLSTIR	0.997	98.2	25	98.2	6	0	0	1848.95	446	461
Eukaryotic translation initiation factor 3 subunit L GN=EIF3L	EIF3L_HUMAN	66.7293	1	10	12	27	0.000371	0.183	SFLKLYTTMPVAK	0.996	29	25	22.8	4	0	0	1498.83	462	474
Eukaryotic translation initiation factor 3 subunit L GN=EIF3L	EIF3L_HUMAN	66.7293	1	10	12	27	0.000371	0.183	LYTTMPVAK	0.99	25.7	25	21.7	1	0	0	1039.55	466	474
Eukaryotic translation initiation factor 3 subunit L GN=EIF3L	EIF3L_HUMAN	66.7293	1	10	12	27	0.000371	0.183	YGDFFIR	0.997	42.6	25	24	3	0	0	917.452	539	545
Eukaryotic translation initiation factor 3 subunit L GN=EIF3L	EIF3L_HUMAN	66.7293	1	10	12	27	0.000371	0.183	QIHKFEELNR	0.995	28.5	25	23.6	1	0	0	1313.7	546	555
ELAV-like protein 1 GN=ELAVL1	ELAV1_HUMAN	36.0926	1	14	16	42	0.000577	0.482	TNLIVNYLPQNMTQDELR	0.997	54.6	25	54.6	2	0	0	2162.09	20	37
ELAV-like protein 1 GN=ELAVL1	ELAV1_HUMAN	36.0926	1	14	16	42	0.000577	0.482	SLFSSIGEVESAK	0.997	87.2	25	76.2	4	0	0	1353.69	38	50
ELAV-like protein 1 GN=ELAVL1	ELAV1_HUMAN	36.0926	1	14	16	42	0.000577	0.482	AINTLNGLR	0.997	39.4	25	27.7	4	0	0	971.563	77	85
ELAV-like protein 1 GN=ELAVL1	ELAV1_HUMAN	36.0926	1	14	16	42	0.000577	0.482	AINTLNGLRLQSK	0.997	38.5	25	35	2	0	0	1427.83	77	89
ELAV-like protein 1 GN=ELAVL1	ELAV1_HUMAN	36.0926	1	14	16	42	0.000577	0.482	TMTQKDVEDMFSR	0.997	51.6	25	51.6	2	0	0	1587.71	116	128
ELAV-like protein 1 GN=ELAVL1	ELAV1_HUMAN	36.0926	1	14	16	42	0.000577	0.482	VLVDQTTGLSR	0.997	86.8	25	64.8	4	0	0	1188.66	137	147
ELAV-like protein 1 GN=ELAVL1	ELAV1_HUMAN	36.0926	1	14	16	42	0.000577	0.482	GVAFIRFDK	0.978	23.8	25	18.5	2	0	0	1052.59	148	156
ELAV-like protein 1 GN=ELAVL1	ELAV1_HUMAN	36.0926	1	14	16	42	0.000577	0.482	SEAEEAITSFNGHKPPGSSEPITVK	0.987	18.4	25	18.4	0	1	0	2612.28	158	182
ELAV-like protein 1 GN=ELAVL1	ELAV1_HUMAN	36.0926	1	14	16	42	0.000577	0.482	FAANPNQNK	0.997	36.7	25	28.6	2	0	0	1003.5	183	191
ELAV-like protein 1 GN=ELAVL1	ELAV1_HUMAN	36.0926	1	14	16	42	0.000577	0.482	NVALLSQLYHSPAR	0.997	45.9	25	45.9	3	0	0	1568.85	192	205
ELAV-like protein 1 GN=ELAVL1	ELAV1_HUMAN	36.0926	1	14	16	42	0.000577	0.482	NVALLSQLYHSPARR	0.986	18.1	25	18.1	0	1	0	1724.96	192	206
ELAV-like protein 1 GN=ELAVL1	ELAV1_HUMAN	36.0926	1	14	16	42	0.000577	0.482	FGGPVHHQAQR	0.997	48.2	25	38.1	2	2	0	1233.62	207	217
ELAV-like protein 1 GN=ELAVL1	ELAV1_HUMAN	36.0926	1	14	16	42	0.000577	0.482	VIRDFNTNK	0.997	41.8	25	40.1	3	0	0	1106.6	275	283
ELAV-like protein 1 GN=ELAVL1	ELAV1_HUMAN	36.0926	1	14	16	42	0.000577	0.482	LGDKILQVSFK	0.997	38.9	25	38.3	4	4	0	1247.74	310	320
ELAV-like protein 2 GN=ELAVL2	ELAV2_HUMAN	39.5052	1	3	3	5	6.87e-05	0.153	AINTLNGLR	0.997	39.4	25	27.7	4	0	0	971.563	96	104
ELAV-like protein 2 GN=ELAVL2	ELAV2_HUMAN	39.5052	1	3	3	5	6.87e-05	0.153	DANLYVSGLPK	0.997	43	25	43	1	0	0	1176.63	124	134
ELAV-like protein 2 GN=ELAVL2	ELAV2_HUMAN	39.5052	1	3	3	5	6.87e-05	0.153	ILVDQVTGISR	0.997	87.2	25	72.9	2	0	0	1200.69	156	166
ELAV-like protein 2 GN=ELAVL2	ELAV2_HUMAN	39.5052	1	3	3	5	6.87e-05	0.153	TNQAILSQLYQSPNR	0.997	50.6	25	49.3	2	0	0	1732.9	210	224
ELAV-like protein 2 GN=ELAVL2	ELAV2_HUMAN	39.5052	1	3	3	5	6.87e-05	0.153	VIRDFNTNK	0.997	41.8	25	40.1	3	0	0	1106.6	307	315
ER membrane protein complex subunit 3 GN=EMC3	EMC3_HUMAN	29.9532	0.998	2	2	2	2.75e-05	0.119	LTQEQVSDSQVLIR	0.997	35	25	25.9	1	0	0	1615.87	44	57
ER membrane protein complex subunit 3 GN=EMC3	EMC3_HUMAN	29.9532	0.998	2	2	2	2.75e-05	0.119	SIYSLILGQDNAADQSR	0.997	48.3	25	48.3	1	0	0	1850.92	181	197
Emerin GN=EMD	EMD_HUMAN	28.9949	1	9	10	26	0.000357	0.37	RYNIPHGPVVGSTR	0.997	21.6	25	21.6	0	2	0	1552.83	18	31
Emerin GN=EMD	EMD_HUMAN	28.9949	1	9	10	26	0.000357	0.37	YNIPHGPVVGSTR	0.997	34.4	25	33.7	1	2	0	1396.73	19	31
Emerin GN=EMD	EMD_HUMAN	28.9949	1	9	10	26	0.000357	0.37	KIFEYETQR	0.997	47.5	25	40.5	2	0	0	1213.62	37	45
Emerin GN=EMD	EMD_HUMAN	28.9949	1	9	10	26	0.000357	0.37	KEDALLYQSK	0.997	67.3	25	54.8	2	0	0	1194.64	79	88
Emerin GN=EMD	EMD_HUMAN	28.9949	1	9	10	26	0.000357	0.37	GYNDDYYEESYFTTR	0.997	63.5	25	63.5	2	0	0	1922.77	89	103
Emerin GN=EMD	EMD_HUMAN	28.9949	1	9	10	26	0.000357	0.37	TYGEPESAGPSR	0.997	51.2	25	49.6	6	0	0	1250.56	104	115
Emerin GN=EMD	EMD_HUMAN	28.9949	1	9	10	26	0.000357	0.37	DSAYQSITHYRPVSASR	0.997	47.2	25	46.9	0	4	0	1937.95	158	174
Emerin GN=EMD	EMD_HUMAN	28.9949	1	9	10	26	0.000357	0.37	AIRPENR	0.997	29.8	25	17	1	0	0	855.48	205	211
Emerin GN=EMD	EMD_HUMAN	28.9949	1	9	10	26	0.000357	0.37	APGAGLGQDR	0.997	49.4	25	43	4	0	0	941.48	212	221
Alpha-enolase GN=ENO1	ENOA_HUMAN	47.1702	1	3	4	11	0.000151	0.0991	AVEHINKTIAPALVSK	0.997	35.9	25	35.9	1	4	0	1690.99	65	80
Alpha-enolase GN=ENO1	ENOA_HUMAN	47.1702	1	3	4	11	0.000151	0.0991	AGAVEKGVPLYR	0.997	37.9	25	34.4	2	0	0	1259.71	121	132
Alpha-enolase GN=ENO1	ENOA_HUMAN	47.1702	1	3	4	11	0.000151	0.0991	VNQIGSVTESLQACK	0.997	80.2	25	0	4	0	0	1633.82	344	358
GTPase Era, mitochondrial GN=ERAL1	ERAL1_HUMAN	48.3494	1	4	4	7	9.62e-05	0.126	STLSNQLLGR	0.997	49.5	25	16.8	2	0	0	1088.61	127	136
GTPase Era, mitochondrial GN=ERAL1	ERAL1_HUMAN	48.3494	1	4	4	7	9.62e-05	0.126	DPNTQSVGNPQR	0.991	27.4	25	26.8	1	0	0	1312.62	285	296
GTPase Era, mitochondrial GN=ERAL1	ERAL1_HUMAN	48.3494	1	4	4	7	9.62e-05	0.126	LLEHLPQEVPYNVQQK	0.976	17.4	25	15.7	0	2	0	1935.03	356	371
GTPase Era, mitochondrial GN=ERAL1	ERAL1_HUMAN	48.3494	1	4	4	7	9.62e-05	0.126	TAVWEEGPGGELVIQQK	0.997	51.7	25	45.6	2	0	0	1840.94	372	388
Erlin-1 GN=ERLIN1	ERLN1_HUMAN	38.9267	1	10	12	22	0.000302	0.454	SVQTTLQTDEVK	0.997	70.4	25	58.6	4	0	0	1348.7	61	72
Erlin-1 GN=ERLIN1	ERLN1_HUMAN	38.9267	1	10	12	22	0.000302	0.454	DLNLMAPGLTIQAVR	0.997	72.8	25	56.9	4	0	0	1627.88	155	169
Erlin-1 GN=ERLIN1	ERLN1_HUMAN	38.9267	1	10	12	22	0.000302	0.454	IPEAIRR	0.994	29.2	25	16	4	0	0	854.521	175	181
Erlin-1 GN=ERLIN1	ERLN1_HUMAN	38.9267	1	10	12	22	0.000302	0.454	NFELMEAEKTK	0.997	45.1	25	33.5	1	0	0	1339.66	182	192
Erlin-1 GN=ERLIN1	ERLN1_HUMAN	38.9267	1	10	12	22	0.000302	0.454	TKLLIAAQK	0.997	36.4	25	36.4	2	0	0	985.641	191	199
Erlin-1 GN=ERLIN1	ERLN1_HUMAN	38.9267	1	10	12	22	0.000302	0.454	VVEKEAETER	0.997	52.5	25	51	3	0	0	1189.61	202	211
Erlin-1 GN=ERLIN1	ERLN1_HUMAN	38.9267	1	10	12	22	0.000302	0.454	AVIEAEKIAQVAK	0.997	67.3	25	63.6	2	2	0	1369.81	214	226
Erlin-1 GN=ERLIN1	ERLN1_HUMAN	38.9267	1	10	12	22	0.000302	0.454	ISEIEDAAFLAR	0.997	100	25	85.5	4	0	0	1334.7	242	253
Erlin-1 GN=ERLIN1	ERLN1_HUMAN	38.9267	1	10	12	22	0.000302	0.454	ISEIEDAAFLAREK	0.997	75.5	25	70.4	2	1	0	1591.83	242	255
Erlin-1 GN=ERLIN1	ERLN1_HUMAN	38.9267	1	10	12	22	0.000302	0.454	ADAEYYAAHK	0.997	48.5	25	48.5	2	0	0	1138.52	258	267
Erlin-1 GN=ERLIN1	ERLN1_HUMAN	38.9267	1	10	12	22	0.000302	0.454	KYQAIASNSK	0.995	29.7	25	29.7	1	0	0	1109.59	285	294
Erlin-1 GN=ERLIN1	ERLN1_HUMAN	38.9267	1	10	12	22	0.000302	0.454	YQAIASNSK	0.986	26.3	25	26.3	2	0	0	981.5	286	294
Erlin-1 GN=ERLIN1	ERLN1_HUMAN	38.9267	1	10	12	22	0.000302	0.454	IYFGSNIPNMFVDSSCALK	0.986	23.8	25	23.8	1	0	0	2179.02	295	313
Erlin-1 GN=ERLIN1	ERLN1_HUMAN	38.9267	1	10	12	22	0.000302	0.454	YSDIRTGR	0.952	20.9	25	13.2	1	0	0	967.496	314	321
Erlin-1 GN=ERLIN1	ERLN1_HUMAN	38.9267	1	10	12	22	0.000302	0.454	ESSLPSKEALEPSGENVIQNK	0.997	23	25	17.8	0	2	0	2256.14	322	342
Erlin-2 GN=ERLIN2	ERLN2_HUMAN	37.8404	1	17	21	45	0.000618	0.404	SVQTTLQTDEVK	0.997	70.4	25	58.6	4	0	0	1348.7	61	72
Erlin-2 GN=ERLIN2	ERLN2_HUMAN	37.8404	1	17	21	45	0.000618	0.404	VTKPNIPEAIR	0.997	40.3	25	40.3	2	0	0	1237.73	170	180
Erlin-2 GN=ERLIN2	ERLN2_HUMAN	37.8404	1	17	21	45	0.000618	0.404	VTKPNIPEAIRR	0.994	19.9	25	17.4	0	2	0	1393.83	170	181
Erlin-2 GN=ERLIN2	ERLN2_HUMAN	37.8404	1	17	21	45	0.000618	0.404	NYELMESEKTK	0.997	46.4	25	41.4	4	0	0	1371.65	182	192
Erlin-2 GN=ERLIN2	ERLN2_HUMAN	37.8404	1	17	21	45	0.000618	0.404	TKLLIAAQK	0.997	36.4	25	36.4	2	0	0	985.641	191	199
Erlin-2 GN=ERLIN2	ERLN2_HUMAN	37.8404	1	17	21	45	0.000618	0.404	VVEKEAETER	0.997	52.5	25	51	3	0	0	1189.61	202	211
Erlin-2 GN=ERLIN2	ERLN2_HUMAN	37.8404	1	17	21	45	0.000618	0.404	ALIEAEKVAQVAEITYGQK	0.997	42.2	25	42.2	0	2	0	2061.12	214	232
Erlin-2 GN=ERLIN2	ERLN2_HUMAN	37.8404	1	17	21	45	0.000618	0.404	VAQVAEITYGQK	0.997	74.4	25	74.4	2	0	0	1306.7	221	232
Erlin-2 GN=ERLIN2	ERLN2_HUMAN	37.8404	1	17	21	45	0.000618	0.404	KISEIEDAAFLAR	0.997	64.6	25	62.9	2	0	0	1462.79	241	253
Erlin-2 GN=ERLIN2	ERLN2_HUMAN	37.8404	1	17	21	45	0.000618	0.404	ISEIEDAAFLAR	0.997	100	25	85.5	4	0	0	1334.7	242	253
Erlin-2 GN=ERLIN2	ERLN2_HUMAN	37.8404	1	17	21	45	0.000618	0.404	ISEIEDAAFLAREK	0.997	75.5	25	70.4	2	1	0	1591.83	242	255
Erlin-2 GN=ERLIN2	ERLN2_HUMAN	37.8404	1	17	21	45	0.000618	0.404	AKADAECYTAMK	0.997	59.6	25	59.6	4	0	0	1358.61	256	267
Erlin-2 GN=ERLIN2	ERLN2_HUMAN	37.8404	1	17	21	45	0.000618	0.404	ADAECYTAMK	0.997	48.2	25	48.2	2	0	0	1159.48	258	267
Erlin-2 GN=ERLIN2	ERLN2_HUMAN	37.8404	1	17	21	45	0.000618	0.404	LTPEYLQLMK	0.996	29.4	25	25.3	3	0	0	1251.67	276	285
Erlin-2 GN=ERLIN2	ERLN2_HUMAN	37.8404	1	17	21	45	0.000618	0.404	YKAIASNSK	0.997	39.9	25	22.5	2	0	0	981.536	286	294
Erlin-2 GN=ERLIN2	ERLN2_HUMAN	37.8404	1	17	21	45	0.000618	0.404	IYFGKDIPNMFMDSAGSVSK	0.997	23.8	25	23.8	0	2	0	2239.04	295	314
Erlin-2 GN=ERLIN2	ERLN2_HUMAN	37.8404	1	17	21	45	0.000618	0.404	DIPNMFMDSAGSVSK	0.997	44.5	25	37.3	2	0	0	1598.72	300	314
Electron transfer flavoprotein subunit alpha, mitochondrial GN=ETFA	ETFA_HUMAN	35.0801	1	11	12	19	0.000261	0.453	LGGEVSCLVAGTK	0.997	63.2	25	61.4	2	0	0	1290.67	47	59
Electron transfer flavoprotein subunit alpha, mitochondrial GN=ETFA	ETFA_HUMAN	35.0801	1	11	12	19	0.000261	0.453	VLVAQHDVYK	0.994	29.7	25	29.7	1	0	0	1171.65	76	85
Electron transfer flavoprotein subunit alpha, mitochondrial GN=ETFA	ETFA_HUMAN	35.0801	1	11	12	19	0.000261	0.453	GLLPEELTPLILATQK	0.997	46.7	25	46.7	1	0	0	1736.02	86	101
Electron transfer flavoprotein subunit alpha, mitochondrial GN=ETFA	ETFA_HUMAN	35.0801	1	11	12	19	0.000261	0.453	QFNYTHICAGASAFGK	0.997	33.6	25	33.6	0	2	0	1771.82	102	117
Electron transfer flavoprotein subunit alpha, mitochondrial GN=ETFA	ETFA_HUMAN	35.0801	1	11	12	19	0.000261	0.453	LEVAPISDIIAIK	0.997	45.4	25	45.4	2	0	0	1381.83	127	139
Electron transfer flavoprotein subunit alpha, mitochondrial GN=ETFA	ETFA_HUMAN	35.0801	1	11	12	19	0.000261	0.453	LEVAPISDIIAIKSPDTFVR	0.955	17.8	25	17.8	0	1	0	2184.23	127	146
Electron transfer flavoprotein subunit alpha, mitochondrial GN=ETFA	ETFA_HUMAN	35.0801	1	11	12	19	0.000261	0.453	TIYAGNALCTVK	0.997	54.5	25	52.3	1	0	0	1310.68	147	158
Electron transfer flavoprotein subunit alpha, mitochondrial GN=ETFA	ETFA_HUMAN	35.0801	1	11	12	19	0.000261	0.453	GTSFDAAATSGGSASSEK	0.997	73.2	25	71.9	2	0	0	1630.72	170	187
Electron transfer flavoprotein subunit alpha, mitochondrial GN=ETFA	ETFA_HUMAN	35.0801	1	11	12	19	0.000261	0.453	SDRPELTGAK	0.997	43.9	25	32.6	1	0	0	1073.56	207	216
Electron transfer flavoprotein subunit alpha, mitochondrial GN=ETFA	ETFA_HUMAN	35.0801	1	11	12	19	0.000261	0.453	LLYDLADQLHAAVGASR	0.997	32.5	25	24.8	0	2	0	1812.96	233	249
Electron transfer flavoprotein subunit alpha, mitochondrial GN=ETFA	ETFA_HUMAN	35.0801	1	11	12	19	0.000261	0.453	AAVDAGFVPNDMQVGQTGK	0.997	65.9	25	65.9	4	0	0	1920.91	250	268
Exocyst complex component 4 GN=EXOC4	EXOC4_HUMAN	110.502	1	4	4	7	9.62e-05	0.0595	SKDPSGLLISVIR	0.997	48.3	25	48.3	2	0	0	1384.82	17	29
Exocyst complex component 4 GN=EXOC4	EXOC4_HUMAN	110.502	1	4	4	7	9.62e-05	0.0595	DASVPLIDVTNLPTPR	0.997	72.8	25	67.7	2	0	0	1707.93	224	239
Exocyst complex component 4 GN=EXOC4	EXOC4_HUMAN	110.502	1	4	4	7	9.62e-05	0.0595	KFLDTSHYSTAGSSSVR	0.997	26.1	25	26.1	0	1	0	1842.9	240	256
Exocyst complex component 4 GN=EXOC4	EXOC4_HUMAN	110.502	1	4	4	7	9.62e-05	0.0595	STTQVADSGYQR	0.997	42.6	25	37.8	2	0	0	1312.61	314	325
Exocyst complex component 6 GN=EXOC6	EXOC6_HUMAN	93.7251	1	3	3	4	5.49e-05	0.0423	FCQLMIENLPK	0.996	29.5	25	23.3	1	0	0	1392.7	177	187
Exocyst complex component 6 GN=EXOC6	EXOC6_HUMAN	93.7251	1	3	3	4	5.49e-05	0.0423	TLSSCLLNLIR	0.997	41.4	25	33.5	2	0	0	1289.72	528	538
Exocyst complex component 6 GN=EXOC6	EXOC6_HUMAN	93.7251	1	3	3	4	5.49e-05	0.0423	VNPNTALTLLEK	0.994	27	25	22.3	1	0	0	1312.75	750	761
Exocyst complex component 8 GN=EXOC8	EXOC8_HUMAN	81.8002	0.998	2	2	2	2.75e-05	0.0331	RFEEGVGKPAK	0.99	20.8	25	17.9	0	1	0	1217.66	692	702
Exocyst complex component 8 GN=EXOC8	EXOC8_HUMAN	81.8002	0.998	2	2	2	2.75e-05	0.0331	LIRVNPESTTSVV	0.991	27.3	25	27.3	1	0	0	1414.79	713	725
Exosome complex component CSL4 GN=EXOSC1	EXOS1_HUMAN	21.4515	0.998	2	2	2	2.75e-05	0.144	ETESQLLPDVGAIVTCK	0.982	38	25	38	1	0	0	1859.94	58	74
Exosome complex component CSL4 GN=EXOSC1	EXOS1_HUMAN	21.4515	0.998	2	2	2	2.75e-05	0.144	SFRPGDIVLAK	0.997	36	25	21.7	1	0	0	1202.69	121	131
Exosome complex component RRP4 GN=EXOSC2	EXOS2_HUMAN	32.7894	0.998	2	2	4	5.49e-05	0.0887	LGQGVLVQVSPSLVKR	0.997	35	25	35	0	2	0	1680.02	166	181
Exosome complex component RRP4 GN=EXOSC2	EXOS2_HUMAN	32.7894	0.998	2	2	4	5.49e-05	0.0887	NCIISLVTQR	0.997	44.8	25	37.3	2	0	0	1203.65	239	248
Exosome complex component MTR3 GN=EXOSC6	EXOS6_HUMAN	28.2356	1	3	3	6	8.24e-05	0.173	GSAYLEAGGTKVLCAVSGPR	0.997	46.4	25	37.4	0	2	0	1993.02	51	70
Exosome complex component MTR3 GN=EXOSC6	EXOS6_HUMAN	28.2356	1	3	3	6	8.24e-05	0.173	GGGPAGAGGEAPAALR	0.997	53.2	25	53.2	2	0	0	1308.67	78	93
Exosome complex component MTR3 GN=EXOSC6	EXOS6_HUMAN	28.2356	1	3	3	6	8.24e-05	0.173	LYPVLQQSLVR	0.997	38.3	25	33	2	0	0	1315.77	251	261
Exosome complex component RRP43 GN=EXOSC8	EXOS8_HUMAN	30.04	1	4	4	8	0.00011	0.163	TTTVNIGSISTADGSALVK	0.997	128	25	128	2	0	0	1834.98	34	52
Exosome complex component RRP43 GN=EXOSC8	EXOS8_HUMAN	30.04	1	4	4	8	0.00011	0.163	LGNTTVICGVK	0.997	50.4	25	43.3	2	0	0	1161.63	53	63
Exosome complex component RRP43 GN=EXOSC8	EXOS8_HUMAN	30.04	1	4	4	8	0.00011	0.163	LQDCMSR	0.997	30.1	25	22.6	2	0	0	909.392	248	254
Exosome complex component RRP43 GN=EXOSC8	EXOS8_HUMAN	30.04	1	4	4	8	0.00011	0.163	KLMDEVIK	0.997	29.5	25	12.6	2	0	0	975.554	264	271
Constitutive coactivator of PPAR-gamma-like protein 1 GN=FAM120A	F120A_HUMAN	121.889	1	3	4	8	0.00011	0.0358	VAAASGHCGAFSGSDSSR	0.997	54.2	25	54.2	2	2	0	1723.75	912	929
Constitutive coactivator of PPAR-gamma-like protein 1 GN=FAM120A	F120A_HUMAN	121.889	1	3	4	8	0.00011	0.0358	GVISTPVIR	0.997	38.4	25	29.2	2	0	0	941.578	987	995
Constitutive coactivator of PPAR-gamma-like protein 1 GN=FAM120A	F120A_HUMAN	121.889	1	3	4	8	0.00011	0.0358	EAALEAAVLNKEE	0.997	46.6	25	41.8	2	0	0	1386.71	1106	1118
6-phosphofructo-2-kinase/fructose-2,6-bisphosphatase 3 GN=PFKFB3	F263_HUMAN	59.6098	1	3	4	6	8.24e-05	0.0712	HGENEHNLQGR	0.997	32.6	25	31.3	1	0	0	1290.59	254	264
6-phosphofructo-2-kinase/fructose-2,6-bisphosphatase 3 GN=PFKFB3	F263_HUMAN	59.6098	1	3	4	6	8.24e-05	0.0712	IGGDSGLSSR	0.997	55.2	25	46.5	2	0	0	948.475	265	274
6-phosphofructo-2-kinase/fructose-2,6-bisphosphatase 3 GN=PFKFB3	F263_HUMAN	59.6098	1	3	4	6	8.24e-05	0.0712	NSVTPLASPEPTKKPR	0.997	48.1	25	42.9	1	2	0	1721.95	460	475
Fanconi anemia group I protein GN=FANCI	FANCI_HUMAN	149.329	0.998	2	2	3	4.12e-05	0.0151	TIETSPSLSR	0.996	27.8	25	27.8	2	0	0	1090.57	403	412
Fanconi anemia group I protein GN=FANCI	FANCI_HUMAN	149.329	0.998	2	2	3	4.12e-05	0.0151	TAFQIRQFQR	0.992	25.6	25	19.6	1	0	0	1294.7	955	964
Fatty acid synthase GN=FASN	FAS_HUMAN	273.427	1	24	25	40	0.000549	0.111	AGLYGLPR	0.997	42.6	25	35	2	0	0	846.483	42	49
Fatty acid synthase GN=FASN	FAS_HUMAN	273.427	1	24	25	40	0.000549	0.111	FDASFFGVHPK	0.997	41	25	31	2	0	0	1251.62	60	70
Fatty acid synthase GN=FASN	FAS_HUMAN	273.427	1	24	25	40	0.000549	0.111	AFDTAGNGYCR	0.997	34.5	25	34.5	1	0	0	1231.52	214	224
Fatty acid synthase GN=FASN	FAS_HUMAN	273.427	1	24	25	40	0.000549	0.111	SEGVVAVLLTK	0.997	62.9	25	59	1	0	0	1115.67	225	235
Fatty acid synthase GN=FASN	FAS_HUMAN	273.427	1	24	25	40	0.000549	0.111	SEGVVAVLLTKK	0.997	38.5	25	37.7	1	0	0	1243.76	225	236
Fatty acid synthase GN=FASN	FAS_HUMAN	273.427	1	24	25	40	0.000549	0.111	ALCATRQEPLLIGSTK	0.986	17.5	25	17.5	0	1	0	1757.96	311	326
Fatty acid synthase GN=FASN	FAS_HUMAN	273.427	1	24	25	40	0.000549	0.111	LQVVDQPLPVR	0.997	45.5	25	45.5	2	0	0	1263.74	374	384
Fatty acid synthase GN=FASN	FAS_HUMAN	273.427	1	24	25	40	0.000549	0.111	TGTVSLEVR	0.997	49.1	25	33.6	2	0	0	961.531	928	936
Fatty acid synthase GN=FASN	FAS_HUMAN	273.427	1	24	25	40	0.000549	0.111	AFEVSENGNLVVSGK	0.997	38.9	25	38.9	1	0	0	1549.79	943	957
Fatty acid synthase GN=FASN	FAS_HUMAN	273.427	1	24	25	40	0.000549	0.111	VYQWDDPDPR	0.981	24.3	25	24.3	1	0	0	1290.58	958	967
Fatty acid synthase GN=FASN	FAS_HUMAN	273.427	1	24	25	40	0.000549	0.111	HGLYLPTR	0.947	22.3	25	20	1	0	0	956.531	1044	1051
Fatty acid synthase GN=FASN	FAS_HUMAN	273.427	1	24	25	40	0.000549	0.111	RQQEQQVPILEK	0.989	26.3	25	23	1	0	0	1495.82	1105	1116
Fatty acid synthase GN=FASN	FAS_HUMAN	273.427	1	24	25	40	0.000549	0.111	AALQEELQLCK	0.997	45.4	25	30.9	1	0	0	1302.67	1132	1142
Fatty acid synthase GN=FASN	FAS_HUMAN	273.427	1	24	25	40	0.000549	0.111	GLVQALQTK	0.997	44.4	25	23.3	2	0	0	957.573	1143	1151
Fatty acid synthase GN=FASN	FAS_HUMAN	273.427	1	24	25	40	0.000549	0.111	SFYGSTLFLCR	0.997	57.5	25	51.7	2	0	0	1350.65	1394	1404
Fatty acid synthase GN=FASN	FAS_HUMAN	273.427	1	24	25	40	0.000549	0.111	AINCATSGVVGLVNCLR	0.982	16.8	25	16.8	0	1	0	1803.92	1445	1461
Fatty acid synthase GN=FASN	FAS_HUMAN	273.427	1	24	25	40	0.000549	0.111	VVVQVLAEEPEAVLK	0.997	69.9	25	63.4	3	0	0	1622.94	1852	1866
Fatty acid synthase GN=FASN	FAS_HUMAN	273.427	1	24	25	40	0.000549	0.111	QGVQVQVSTSNISSLEGAR	0.997	76	25	76	2	0	0	1960.01	1935	1953
Fatty acid synthase GN=FASN	FAS_HUMAN	273.427	1	24	25	40	0.000549	0.111	GNAGQSNYGFANSAMER	0.997	72.1	25	72.1	2	0	0	1773.76	2027	2043
Fatty acid synthase GN=FASN	FAS_HUMAN	273.427	1	24	25	40	0.000549	0.111	EDGLAQQQTQLNLR	0.997	45.7	25	40.2	2	0	0	1613.82	2207	2220
Fatty acid synthase GN=FASN	FAS_HUMAN	273.427	1	24	25	40	0.000549	0.111	SLLVNPEGPTLMR	0.997	40.9	25	32.6	4	0	0	1426.77	2221	2233
Fatty acid synthase GN=FASN	FAS_HUMAN	273.427	1	24	25	40	0.000549	0.111	LSIPTYGLQCTR	0.997	33.1	25	21.2	2	0	0	1408.73	2264	2275
Fatty acid synthase GN=FASN	FAS_HUMAN	273.427	1	24	25	40	0.000549	0.111	VAAAVDLIIK	0.993	26.8	25	26.8	1	0	0	1012.64	2397	2406
Fatty acid synthase GN=FASN	FAS_HUMAN	273.427	1	24	25	40	0.000549	0.111	AAEQYTPK	0.994	28	25	16	2	0	0	907.452	2429	2436
rRNA 2'-O-methyltransferase fibrillarin GN=FBL	FBRL_HUMAN	33.7841	1	10	13	35	0.000481	0.361	NVMVEPHRHEGVFICR	0.997	30.3	25	29.8	0	2	0	1995.96	85	100
rRNA 2'-O-methyltransferase fibrillarin GN=FBL	FBRL_HUMAN	33.7841	1	10	13	35	0.000481	0.361	GKEDALVTK	0.997	43.7	25	28.9	4	0	0	960.536	101	109
rRNA 2'-O-methyltransferase fibrillarin GN=FBL	FBRL_HUMAN	33.7841	1	10	13	35	0.000481	0.361	NLVPGESVYGEK	0.948	20.5	25	17.4	1	0	0	1291.65	110	121
rRNA 2'-O-methyltransferase fibrillarin GN=FBL	FBRL_HUMAN	33.7841	1	10	13	35	0.000481	0.361	NLVPGESVYGEKR	0.997	54.2	25	49	5	2	0	1447.75	110	122
rRNA 2'-O-methyltransferase fibrillarin GN=FBL	FBRL_HUMAN	33.7841	1	10	13	35	0.000481	0.361	VSISEGDDKIEYR	0.997	71.6	25	71.6	4	2	0	1510.74	123	135
rRNA 2'-O-methyltransferase fibrillarin GN=FBL	FBRL_HUMAN	33.7841	1	10	13	35	0.000481	0.361	LAAAILGGVDQIHIKPGAK	0.997	33.7	25	29.6	0	4	0	1872.11	144	162
rRNA 2'-O-methyltransferase fibrillarin GN=FBL	FBRL_HUMAN	33.7841	1	10	13	35	0.000481	0.361	SGRDLINLAK	0.991	27.2	25	20.1	2	0	0	1086.63	196	205
rRNA 2'-O-methyltransferase fibrillarin GN=FBL	FBRL_HUMAN	33.7841	1	10	13	35	0.000481	0.361	TNIIPVIEDAR	0.997	48.8	25	0	3	0	0	1240.69	208	218
rRNA 2'-O-methyltransferase fibrillarin GN=FBL	FBRL_HUMAN	33.7841	1	10	13	35	0.000481	0.361	IVALNAHTFLR	0.997	48	25	47.5	3	1	0	1254.73	245	255
rRNA 2'-O-methyltransferase fibrillarin GN=FBL	FBRL_HUMAN	33.7841	1	10	13	35	0.000481	0.361	DHAVVVGVYRPPPK	0.997	27.8	25	27.8	0	2	0	1533.85	305	318
Flap endonuclease 1 GN=FEN1	FEN1_HUMAN	42.5942	1	2	2	3	4.12e-05	0.05	KLPIQEFHLSR	0.967	15.8	25	15.8	0	1	0	1367.78	201	211
Flap endonuclease 1 GN=FEN1	FEN1_HUMAN	42.5942	1	2	2	3	4.12e-05	0.05	RAVDLIQK	0.983	23.2	25	17.2	2	0	0	942.573	245	252
Fibronectin GN=FN1	FINC_HUMAN	262.617	1	4	4	7	9.62e-05	0.021	ISCTIANR	0.986	24.7	25	17.4	1	0	0	934.477	133	140
Fibronectin GN=FN1	FINC_HUMAN	262.617	1	4	4	7	9.62e-05	0.021	LGVRPSQGGEAPR	0.974	22.2	25	22.2	1	0	0	1323.71	1117	1129
Fibronectin GN=FN1	FINC_HUMAN	262.617	1	4	4	7	9.62e-05	0.021	STTPDITGYR	0.996	28.7	25	22	1	0	0	1110.54	1198	1207
Fibronectin GN=FN1	FINC_HUMAN	262.617	1	4	4	7	9.62e-05	0.021	SSPVVIDASTAIDAPSNLR	0.997	55.9	25	55.2	4	0	0	1913	1892	1910
Pre-mRNA 3'-end-processing factor FIP1 GN=FIP1L1	FIP1_HUMAN	66.5269	1	4	4	5	6.87e-05	0.0791	TGAPQYGSYGTAPVNLNIK	0.997	69	25	65.4	2	0	0	1950.99	105	123
Pre-mRNA 3'-end-processing factor FIP1 GN=FIP1L1	FIP1_HUMAN	66.5269	1	4	4	5	6.87e-05	0.0791	TGGRVYGTTGTK	0.97	21.8	25	20.6	1	0	0	1197.62	124	135
Pre-mRNA 3'-end-processing factor FIP1 GN=FIP1L1	FIP1_HUMAN	66.5269	1	4	4	5	6.87e-05	0.0791	VYGTTGTKVK	0.985	27.4	25	27.4	1	0	0	1053.59	128	137
Pre-mRNA 3'-end-processing factor FIP1 GN=FIP1L1	FIP1_HUMAN	66.5269	1	4	4	5	6.87e-05	0.0791	NSTSSQSQTSTASR	0.997	47.7	25	43.9	1	0	0	1441.65	273	286
Protein flightless-1 homolog GN=FLII	FLII_HUMAN	144.755	1	3	3	5	6.87e-05	0.0292	SLEGTEAQVFKAK	0.997	50	25	50	2	0	0	1407.75	822	834
Protein flightless-1 homolog GN=FLII	FLII_HUMAN	144.755	1	3	3	5	6.87e-05	0.0292	ADLTALFLPR	0.997	45.7	25	33.5	1	0	0	1116.64	875	884
Protein flightless-1 homolog GN=FLII	FLII_HUMAN	144.755	1	3	3	5	6.87e-05	0.0292	AVQGAQQPSLYQIR	0.997	41.5	25	36.7	2	0	0	1558.83	1047	1060
Filamin-A GN=FLNA	FLNA_HUMAN	280.729	1	23	24	69	0.000948	0.119	IQQNTFTR	0.991	26.4	25	11.8	1	0	0	1007.53	44	51
Filamin-A GN=FLNA	FLNA_HUMAN	280.729	1	23	24	69	0.000948	0.119	VTVLFAGQHIAK	0.995	29.8	25	29.8	1	0	0	1283.75	356	367
Filamin-A GN=FLNA	FLNA_HUMAN	280.729	1	23	24	69	0.000948	0.119	VTAQGPGLEPSGNIANK	0.99	24.5	25	24.2	1	0	0	1652.86	384	400
Filamin-A GN=FLNA	FLNA_HUMAN	280.729	1	23	24	69	0.000948	0.119	SPYTVTVGQACNPSACR	0.997	82.9	25	82.9	3	0	0	1867.84	468	484
Filamin-A GN=FLNA	FLNA_HUMAN	280.729	1	23	24	69	0.000948	0.119	TGVAVNKPAEFTVDAK	0.997	26.4	25	26.4	2	3	0	1646.87	685	700
Filamin-A GN=FLNA	FLNA_HUMAN	280.729	1	23	24	69	0.000948	0.119	VNVGAGSHPNK	0.997	52	25	52	1	0	0	1079.56	761	771
Filamin-A GN=FLNA	FLNA_HUMAN	280.729	1	23	24	69	0.000948	0.119	VKAEGPGLSR	0.98	23.2	25	12.5	1	0	0	1013.57	875	884
Filamin-A GN=FLNA	FLNA_HUMAN	280.729	1	23	24	69	0.000948	0.119	TGVELGKPTHFTVNAK	0.997	24	25	18.8	0	5	0	1698.92	885	900
Filamin-A GN=FLNA	FLNA_HUMAN	280.729	1	23	24	69	0.000948	0.119	YTPVQQGPVGVNVTYGGDPIPK	0.997	29.9	25	29.9	2	0	0	2286.18	937	958
Filamin-A GN=FLNA	FLNA_HUMAN	280.729	1	23	24	69	0.000948	0.119	SPFSVAVSPSLDLSK	0.997	51.7	25	40.2	6	0	0	1533.82	959	973
Filamin-A GN=FLNA	FLNA_HUMAN	280.729	1	23	24	69	0.000948	0.119	IVGPSGAAVPCKVEPGLGADNSVVR	0.997	28.4	25	28.4	0	3	0	2449.29	1008	1032
Filamin-A GN=FLNA	FLNA_HUMAN	280.729	1	23	24	69	0.000948	0.119	AFGPGLQGGSAGSPAR	0.997	70.3	25	70.3	6	0	0	1429.72	1072	1087
Filamin-A GN=FLNA	FLNA_HUMAN	280.729	1	23	24	69	0.000948	0.119	CSGPGLER	0.973	30.4	25	21.8	1	0	0	875.404	1165	1172
Filamin-A GN=FLNA	FLNA_HUMAN	280.729	1	23	24	69	0.000948	0.119	YGGQPVPNFPSK	0.983	23.2	25	23.2	1	0	0	1290.65	1235	1246
Filamin-A GN=FLNA	FLNA_HUMAN	280.729	1	23	24	69	0.000948	0.119	EATTEFSVDAR	0.997	41	25	33.2	5	0	0	1225.57	1273	1283
Filamin-A GN=FLNA	FLNA_HUMAN	280.729	1	23	24	69	0.000948	0.119	ALTQTGGPHVK	0.997	37	25	29.4	6	0	0	1108.61	1284	1294
Filamin-A GN=FLNA	FLNA_HUMAN	280.729	1	23	24	69	0.000948	0.119	GAGTGGLGLAVEGPSEAK	0.997	82.1	25	77.8	6	0	0	1570.81	1382	1399
Filamin-A GN=FLNA	FLNA_HUMAN	280.729	1	23	24	69	0.000948	0.119	ANLPQSFQVDTSK	0.997	49.8	25	49.4	6	0	0	1434.72	1465	1477
Filamin-A GN=FLNA	FLNA_HUMAN	280.729	1	23	24	69	0.000948	0.119	AGVAPLQVK	0.985	24.4	25	24.4	1	0	0	882.541	1478	1486
Filamin-A GN=FLNA	FLNA_HUMAN	280.729	1	23	24	69	0.000948	0.119	YGGDEIPFSPYR	0.997	41.5	25	19.4	2	0	0	1400.65	1622	1633
Filamin-A GN=FLNA	FLNA_HUMAN	280.729	1	23	24	69	0.000948	0.119	KGEITGEVR	0.997	40.7	25	14.7	3	0	0	988.542	1801	1809
Filamin-A GN=FLNA	FLNA_HUMAN	280.729	1	23	24	69	0.000948	0.119	ATCAPQHGAPGPGPADASK	0.997	32.3	25	31.8	0	2	0	1789.83	2541	2559
Filamin-A GN=FLNA	FLNA_HUMAN	280.729	1	23	24	69	0.000948	0.119	TPCEEILVK	0.993	26	25	18.6	1	0	0	1088.57	2599	2607
Fragile X mental retardation protein 1 GN=FMR1	FMR1_HUMAN	71.1744	1	8	11	26	0.000357	0.139	SVNPNKPATK	0.997	43.8	25	26.1	4	0	0	1055.58	114	123
Fragile X mental retardation protein 1 GN=FMR1	FMR1_HUMAN	71.1744	1	8	11	26	0.000357	0.139	SVNPNKPATKDTFHK	0.985	18	25	18	0	1	0	1683.88	114	128
Fragile X mental retardation protein 1 GN=FMR1	FMR1_HUMAN	71.1744	1	8	11	26	0.000357	0.139	SFLEFAEDVIQVPR	0.997	41.2	25	41.2	4	2	0	1649.85	277	290
Fragile X mental retardation protein 1 GN=FMR1	FMR1_HUMAN	71.1744	1	8	11	26	0.000357	0.139	LIQEIVDKSGVVR	0.997	55.9	25	55.9	3	4	0	1455.85	303	315
Fragile X mental retardation protein 1 GN=FMR1	FMR1_HUMAN	71.1744	1	8	11	26	0.000357	0.139	VGPNAPEEK	0.981	22.3	25	19.8	2	0	0	940.473	345	353
Fragile X mental retardation protein 1 GN=FMR1	FMR1_HUMAN	71.1744	1	8	11	26	0.000357	0.139	VLVASSVVAGESQKPELK	0.997	42.9	25	42.9	1	1	0	1841.04	376	393
Fragile X mental retardation protein 1 GN=FMR1	FMR1_HUMAN	71.1744	1	8	11	26	0.000357	0.139	LQIDEQLR	0.997	34.6	25	20.3	2	0	0	1014.56	435	442
Fragile X mental retardation protein 1 GN=FMR1	FMR1_HUMAN	71.1744	1	8	11	26	0.000357	0.139	TLQNTSSEGSR	0.997	37.7	25	35.8	2	0	0	1179.56	594	604
Farnesyl pyrophosphate synthase GN=FDPS	FPPS_HUMAN	48.2768	0.998	2	3	5	6.87e-05	0.0644	VLTEDEMGHPEIGDAIAR	0.997	29.2	25	29.2	0	3	0	1952.94	93	110
Farnesyl pyrophosphate synthase GN=FDPS	FPPS_HUMAN	48.2768	0.998	2	3	5	6.87e-05	0.0644	KQDADSLQR	0.997	46.1	25	19.2	2	0	0	1060.54	142	150
Protein FRG1 GN=FRG1	FRG1_HUMAN	29.1737	1	3	3	3	4.12e-05	0.136	YLGINSDGLVVGR	0.997	70.2	25	70.2	1	0	0	1362.74	116	128
Protein FRG1 GN=FRG1	FRG1_HUMAN	29.1737	1	3	3	3	4.12e-05	0.136	MALLASNSCFIR	0.956	23	25	23	1	0	0	1382.69	147	158
Protein FRG1 GN=FRG1	FRG1_HUMAN	29.1737	1	3	3	3	4.12e-05	0.136	CNEAGDIEAK	0.99	27.6	25	18.5	1	0	0	1106.48	159	168
Far upstream element-binding protein 2 GN=KHSRP	FUBP2_HUMAN	73.1156	1	5	5	8	0.00011	0.0985	DAFADAVQR	0.997	36.8	25	26.9	2	0	0	992.48	72	80
Far upstream element-binding protein 2 GN=KHSRP	FUBP2_HUMAN	73.1156	1	5	5	8	0.00011	0.0985	IGGDAATTVNNSTPDFGFGGQKR	0.997	62.2	25	62.2	0	2	0	2310.11	88	110
Far upstream element-binding protein 2 GN=KHSRP	FUBP2_HUMAN	73.1156	1	5	5	8	0.00011	0.0985	SVSLTGAPESVQK	0.987	24.4	25	18.8	1	0	0	1302.69	191	203
Far upstream element-binding protein 2 GN=KHSRP	FUBP2_HUMAN	73.1156	1	5	5	8	0.00011	0.0985	IGGGIDVPVPR	0.997	64.7	25	58.4	2	0	0	1079.62	321	331
Far upstream element-binding protein 2 GN=KHSRP	FUBP2_HUMAN	73.1156	1	5	5	8	0.00011	0.0985	AINQQTGAFVEISR	0.997	63.5	25	60.3	1	0	0	1533.8	449	462
Fragile X mental retardation syndrome-related protein 2 GN=FXR2	FXR2_HUMAN	74.224	1	5	7	14	0.000192	0.119	LRPVNPNPLATK	0.997	41.8	25	41.8	3	1	0	1319.78	122	133
Fragile X mental retardation syndrome-related protein 2 GN=FXR2	FXR2_HUMAN	74.224	1	5	7	14	0.000192	0.119	ASLLGDMHFR	0.997	40.4	25	32.7	1	0	0	1146.57	191	200
Fragile X mental retardation syndrome-related protein 2 GN=FXR2	FXR2_HUMAN	74.224	1	5	7	14	0.000192	0.119	VIQEIVDKSGVVR	0.997	59.3	25	59.3	4	2	0	1441.84	313	325
Fragile X mental retardation syndrome-related protein 2 GN=FXR2	FXR2_HUMAN	74.224	1	5	7	14	0.000192	0.119	LQIDEQLR	0.997	34.6	25	20.3	2	0	0	1014.56	379	386
Fragile X mental retardation syndrome-related protein 2 GN=FXR2	FXR2_HUMAN	74.224	1	5	7	14	0.000192	0.119	AGYSTDESSSSSLHATR	0.997	51.3	25	50.2	1	0	0	1755.78	407	423
Fragile X mental retardation syndrome-related protein 2 GN=FXR2	FXR2_HUMAN	74.224	1	5	7	14	0.000192	0.119	TDGSISGDRQPVTVADYISR	0.997	48.5	25	48.5	0	2	0	2137.05	598	617
Glyceraldehyde-3-phosphate dehydrogenase GN=GAPDH	G3P_HUMAN	36.0534	1	7	8	23	0.000316	0.215	VGVNGFGR	0.997	38.6	25	28.1	2	0	0	805.432	6	13
Glyceraldehyde-3-phosphate dehydrogenase GN=GAPDH	G3P_HUMAN	36.0534	1	7	8	23	0.000316	0.215	IGRLVTR	0.993	26.4	25	1.14	1	0	0	814.526	14	20
Glyceraldehyde-3-phosphate dehydrogenase GN=GAPDH	G3P_HUMAN	36.0534	1	7	8	23	0.000316	0.215	AGAHLQGGAK	0.972	21.3	25	18.4	1	0	0	909.49	108	117
Glyceraldehyde-3-phosphate dehydrogenase GN=GAPDH	G3P_HUMAN	36.0534	1	7	8	23	0.000316	0.215	IISNASCTTNCLAPLAK	0.997	54.5	25	48.3	4	0	0	1833.92	146	162
Glyceraldehyde-3-phosphate dehydrogenase GN=GAPDH	G3P_HUMAN	36.0534	1	7	8	23	0.000316	0.215	DGRGALQNIIPASTGAAK	0.997	53.2	25	50.4	4	3	0	1739.94	198	215
Glyceraldehyde-3-phosphate dehydrogenase GN=GAPDH	G3P_HUMAN	36.0534	1	7	8	23	0.000316	0.215	GALQNIIPASTGAAK	0.997	43.9	25	39.8	4	0	0	1411.79	201	215
Glyceraldehyde-3-phosphate dehydrogenase GN=GAPDH	G3P_HUMAN	36.0534	1	7	8	23	0.000316	0.215	VVDLMAHMASKE	0.997	48.9	25	47.7	4	0	0	1362.64	324	335
Galactokinase GN=GALK1	GALK1_HUMAN	42.2721	1	8	8	13	0.000179	0.202	GHALLIDCR	0.997	34.1	25	32.1	2	0	0	1054.55	196	204
Galactokinase GN=GALK1	GALK1_HUMAN	42.2721	1	8	8	13	0.000179	0.202	SLETSLVPLSDPK	0.996	34.5	25	25.2	2	0	0	1385.75	205	217
Galactokinase GN=GALK1	GALK1_HUMAN	42.2721	1	8	8	13	0.000179	0.202	LAVLITNSNVR	0.988	31.8	25	22.7	1	0	0	1199.71	218	228
Galactokinase GN=GALK1	GALK1_HUMAN	42.2721	1	8	8	13	0.000179	0.202	HSLASSEYPVR	0.997	42.2	25	30.5	2	0	0	1245.62	229	239
Galactokinase GN=GALK1	GALK1_HUMAN	42.2721	1	8	8	13	0.000179	0.202	RQCEEVAR	0.997	35.6	25	19.5	2	0	0	1047.5	241	248
Galactokinase GN=GALK1	GALK1_HUMAN	42.2721	1	8	8	13	0.000179	0.202	EVQLEELEAAR	0.978	22.4	25	18	1	0	0	1286.66	257	267
Galactokinase GN=GALK1	GALK1_HUMAN	42.2721	1	8	8	13	0.000179	0.202	TAQAAAALR	0.997	39.8	25	31.2	2	0	0	872.495	288	296
Galactokinase GN=GALK1	GALK1_HUMAN	42.2721	1	8	8	13	0.000179	0.202	LMVESHR	0.997	39	25	13.3	1	0	0	871.445	306	312
Neutral alpha-glucosidase AB GN=GANAB	GANAB_HUMAN	106.876	1	5	5	7	9.62e-05	0.0699	SIRPGLSPYR	0.967	24.3	25	16.6	2	0	0	1145.64	52	61
Neutral alpha-glucosidase AB GN=GANAB	GANAB_HUMAN	106.876	1	5	5	7	9.62e-05	0.0699	YRVPDVLVADPPIAR	0.997	25.7	25	25.7	0	1	0	1680.94	113	127
Neutral alpha-glucosidase AB GN=GANAB	GANAB_HUMAN	106.876	1	5	5	7	9.62e-05	0.0699	GLLEFEHQRAPR	0.997	27.8	25	25	0	2	0	1452.77	174	185
Neutral alpha-glucosidase AB GN=GANAB	GANAB_HUMAN	106.876	1	5	5	7	9.62e-05	0.0699	SGGMERPFVLAR	0.966	16.4	25	12.6	0	1	0	1319.69	591	602
Neutral alpha-glucosidase AB GN=GANAB	GANAB_HUMAN	106.876	1	5	5	7	9.62e-05	0.0699	VVIIGAGKPAAVVLQTK	0.996	21.7	25	21.7	0	1	0	1664.05	892	908
H/ACA ribonucleoprotein complex subunit 1 GN=GAR1	GAR1_HUMAN	22.3486	1	4	5	11	0.000151	0.184	GQDQGPPER	0.997	39.9	25	37.6	3	0	0	983.454	61	69
H/ACA ribonucleoprotein complex subunit 1 GN=GAR1	GAR1_HUMAN	22.3486	1	4	5	11	0.000151	0.184	VVLLGEFLHPCEDDIVCK	0.997	25.2	25	25.2	0	2	0	2143.06	70	87
H/ACA ribonucleoprotein complex subunit 1 GN=GAR1	GAR1_HUMAN	22.3486	1	4	5	11	0.000151	0.184	FYIDPYK	0.982	23.1	25	22.4	1	0	0	945.472	144	150
H/ACA ribonucleoprotein complex subunit 1 GN=GAR1	GAR1_HUMAN	22.3486	1	4	5	11	0.000151	0.184	FYIDPYKLLPLQR	0.997	27.8	25	27.8	3	2	0	1665.94	144	156
G-protein coupled receptor-associated sorting protein 2 GN=GPRASP2	GASP2_HUMAN	93.7745	1	2	2	3	4.12e-05	0.0286	TEAQAMSGARPK	0.997	33.8	25	33.1	1	0	0	1262.62	64	75
G-protein coupled receptor-associated sorting protein 2 GN=GPRASP2	GASP2_HUMAN	93.7745	1	2	2	3	4.12e-05	0.0286	TEAQGITGARPK	0.997	33.8	25	29.5	2	0	0	1228.66	88	99
Guanine nucleotide-binding protein G(I)/G(S)/G(T) subunit beta-1 GN=GNB1	GBB1_HUMAN	37.3775	1	2	2	3	4.12e-05	0.103	ELAGHTGYLSCCR	0.997	52.7	25	51.2	1	0	0	1523.67	138	150
Guanine nucleotide-binding protein G(I)/G(S)/G(T) subunit beta-1 GN=GNB1	GBB1_HUMAN	37.3775	1	2	2	3	4.12e-05	0.103	LFVSGACDASAK	0.997	61.2	25	41.4	2	0	0	1225.59	198	209
Guanine nucleotide-binding protein G(I)/G(S)/G(T) subunit beta-1 GN=GNB1	GBB1_HUMAN	37.3775	1	2	2	3	4.12e-05	0.103	AGVLAGHDNR	0.987	26.7	25	26.7	1	0	0	1009.52	305	314
Guanine nucleotide-binding protein G(I)/G(S)/G(T) subunit beta-2 GN=GNB2	GBB2_HUMAN	37.3318	1	5	5	9	0.000124	0.162	KACGDSTLTQITAGLDPVGR	0.997	33	25	33	0	2	0	2060.04	23	42
Guanine nucleotide-binding protein G(I)/G(S)/G(T) subunit beta-2 GN=GNB2	GBB2_HUMAN	37.3318	1	5	5	9	0.000124	0.162	ACGDSTLTQITAGLDPVGR	0.997	50.1	25	50.1	2	0	0	1931.95	24	42
Guanine nucleotide-binding protein G(I)/G(S)/G(T) subunit beta-2 GN=GNB2	GBB2_HUMAN	37.3318	1	5	5	9	0.000124	0.162	ELPGHTGYLSCCR	0.997	30.4	25	29.1	2	0	0	1549.69	138	150
Guanine nucleotide-binding protein G(I)/G(S)/G(T) subunit beta-2 GN=GNB2	GBB2_HUMAN	37.3318	1	5	5	9	0.000124	0.162	TFVSGACDASIK	0.997	46	25	33.1	2	0	0	1255.6	198	209
Guanine nucleotide-binding protein G(I)/G(S)/G(T) subunit beta-2 GN=GNB2	GBB2_HUMAN	37.3318	1	5	5	9	0.000124	0.162	AGVLAGHDNR	0.987	26.7	25	26.7	1	0	0	1009.52	305	314
Golgi-specific brefeldin A-resistance guanine nucleotide exchange factor 1 GN=GBF1	GBF1_HUMAN	206.451	1	4	4	6	8.24e-05	0.0264	FSCLLPDPR	0.966	22.1	25	22.1	1	0	0	1104.55	683	691
Golgi-specific brefeldin A-resistance guanine nucleotide exchange factor 1 GN=GBF1	GBF1_HUMAN	206.451	1	4	4	6	8.24e-05	0.0264	LLITGTEQFNQKPK	0.997	56.3	25	56.3	2	0	0	1616.9	702	715
Golgi-specific brefeldin A-resistance guanine nucleotide exchange factor 1 GN=GBF1	GBF1_HUMAN	206.451	1	4	4	6	8.24e-05	0.0264	KGIQFLQEK	0.99	25.2	25	19	1	0	0	1090.63	716	724
Golgi-specific brefeldin A-resistance guanine nucleotide exchange factor 1 GN=GBF1	GBF1_HUMAN	206.451	1	4	4	6	8.24e-05	0.0264	AASSSSPGSPVASSPSR	0.997	49.1	25	48	2	0	0	1531.73	1776	1792
Guanine nucleotide-binding protein subunit beta-2-like 1 GN=GNB2L1	GBLP_HUMAN	35.077	1	9	11	19	0.000261	0.334	LTRDETNYGIPQR	0.997	49.2	25	42.5	2	1	0	1562.79	45	57
Guanine nucleotide-binding protein subunit beta-2-like 1 GN=GNB2L1	GBLP_HUMAN	35.077	1	9	11	19	0.000261	0.334	DETNYGIPQR	0.997	33.6	25	25.3	2	0	0	1192.56	48	57
Guanine nucleotide-binding protein subunit beta-2-like 1 GN=GNB2L1	GBLP_HUMAN	35.077	1	9	11	19	0.000261	0.334	FVGHTKDVLSVAFSSDNR	0.997	29.3	25	29.3	0	1	0	1979	101	118
Guanine nucleotide-binding protein subunit beta-2-like 1 GN=GNB2L1	GBLP_HUMAN	35.077	1	9	11	19	0.000261	0.334	DVLSVAFSSDNR	0.997	74.1	25	74.1	2	0	0	1309.64	107	118
Guanine nucleotide-binding protein subunit beta-2-like 1 GN=GNB2L1	GBLP_HUMAN	35.077	1	9	11	19	0.000261	0.334	DVLSVAFSSDNRQIVSGSR	0.997	45	25	45	0	2	0	2037.04	107	125
Guanine nucleotide-binding protein subunit beta-2-like 1 GN=GNB2L1	GBLP_HUMAN	35.077	1	9	11	19	0.000261	0.334	YTVQDESHSEWVSCVR	0.997	36.6	25	36.6	0	1	0	1981.87	140	155
Guanine nucleotide-binding protein subunit beta-2-like 1 GN=GNB2L1	GBLP_HUMAN	35.077	1	9	11	19	0.000261	0.334	TNHIGHTGYLNTVTVSPDGSLCASGGK	0.997	54.1	25	54	0	2	0	2743.31	186	212
Guanine nucleotide-binding protein subunit beta-2-like 1 GN=GNB2L1	GBLP_HUMAN	35.077	1	9	11	19	0.000261	0.334	IIVDELKQEVISTSSK	0.997	79.2	25	79.2	2	2	0	1789	265	280
Guanine nucleotide-binding protein subunit beta-2-like 1 GN=GNB2L1	GBLP_HUMAN	35.077	1	9	11	19	0.000261	0.334	VWQVTIGTR	0.997	67.9	25	58.7	2	0	0	1059.59	309	317
Translational activator GCN1 GN=GCN1L1	GCN1L_HUMAN	292.764	1	48	55	115	0.00158	0.194	VTTASVKER	0.97	22.6	25	18.1	1	0	0	990.558	18	26
Translational activator GCN1 GN=GCN1L1	GCN1L_HUMAN	292.764	1	48	55	115	0.00158	0.194	LFCLTLHR	0.997	34.5	25	26.2	2	0	0	1059.58	53	60
Translational activator GCN1 GN=GCN1L1	GCN1L_HUMAN	292.764	1	48	55	115	0.00158	0.194	ALQAAIQQLAEAQPEATAK	0.997	69.1	25	69.1	1	1	0	1952.04	69	87
Translational activator GCN1 GN=GCN1L1	GCN1L_HUMAN	292.764	1	48	55	115	0.00158	0.194	NLLHSLQSSGIGSK	0.997	54	25	45.7	2	1	0	1440.78	88	101
Translational activator GCN1 GN=GCN1L1	GCN1L_HUMAN	292.764	1	48	55	115	0.00158	0.194	SALLDFYMK	0.996	28.1	25	28.1	2	0	0	1103.54	221	229
Translational activator GCN1 GN=GCN1L1	GCN1L_HUMAN	292.764	1	48	55	115	0.00158	0.194	YLLDSCAPLLR	0.997	48.7	25	48.7	2	0	0	1320.7	241	251
Translational activator GCN1 GN=GCN1L1	GCN1L_HUMAN	292.764	1	48	55	115	0.00158	0.194	LMDEAVLALR	0.997	47.5	25	33.7	6	0	0	1130.62	314	323
Translational activator GCN1 GN=GCN1L1	GCN1L_HUMAN	292.764	1	48	55	115	0.00158	0.194	QCSDSSAMESLTK	0.997	38.6	25	37.3	1	0	0	1443.61	328	340
Translational activator GCN1 GN=GCN1L1	GCN1L_HUMAN	292.764	1	48	55	115	0.00158	0.194	LSVADSQAEAK	0.997	35.5	25	35.5	2	0	0	1118.57	499	509
Translational activator GCN1 GN=GCN1L1	GCN1L_HUMAN	292.764	1	48	55	115	0.00158	0.194	LTGNKVQQYHR	0.997	43.1	25	43.1	1	0	0	1343.72	557	567
Translational activator GCN1 GN=GCN1L1	GCN1L_HUMAN	292.764	1	48	55	115	0.00158	0.194	ALVAVLLSR	0.997	74.6	25	63.3	6	0	0	941.614	568	576
Translational activator GCN1 GN=GCN1L1	GCN1L_HUMAN	292.764	1	48	55	115	0.00158	0.194	HLDQIIPR	0.997	41.8	25	37	2	0	0	991.568	705	712
Translational activator GCN1 GN=GCN1L1	GCN1L_HUMAN	292.764	1	48	55	115	0.00158	0.194	SIIQSAQQDSIKK	0.997	31.5	25	31.5	1	0	0	1445.8	777	789
Translational activator GCN1 GN=GCN1L1	GCN1L_HUMAN	292.764	1	48	55	115	0.00158	0.194	GIKEEVQLTSK	0.997	48.4	25	27.5	2	1	0	1231.69	819	829
Translational activator GCN1 GN=GCN1L1	GCN1L_HUMAN	292.764	1	48	55	115	0.00158	0.194	ALGTLVSHVTLR	0.997	65.4	25	52.9	2	0	0	1266.75	915	926
Translational activator GCN1 GN=GCN1L1	GCN1L_HUMAN	292.764	1	48	55	115	0.00158	0.194	LLKPECVLDK	0.991	25.5	25	25.5	1	0	0	1214.68	927	936
Translational activator GCN1 GN=GCN1L1	GCN1L_HUMAN	292.764	1	48	55	115	0.00158	0.194	ASPNTPPGRVDENGPELLPR	0.997	21.5	25	20.7	0	2	0	2116.08	1018	1037
Translational activator GCN1 GN=GCN1L1	GCN1L_HUMAN	292.764	1	48	55	115	0.00158	0.194	VDENGPELLPR	0.997	37.5	25	32.4	2	0	0	1238.64	1027	1037
Translational activator GCN1 GN=GCN1L1	GCN1L_HUMAN	292.764	1	48	55	115	0.00158	0.194	QAGAEALSQAVAR	0.997	69.8	25	63.6	7	0	0	1271.67	1177	1189
Translational activator GCN1 GN=GCN1L1	GCN1L_HUMAN	292.764	1	48	55	115	0.00158	0.194	NAPNDASYDAVR	0.992	26.8	25	26.8	1	0	0	1292.59	1305	1316
Translational activator GCN1 GN=GCN1L1	GCN1L_HUMAN	292.764	1	48	55	115	0.00158	0.194	LMQQLLESDKYAER	0.991	19.4	25	16.8	0	2	0	1723.87	1381	1394
Translational activator GCN1 GN=GCN1L1	GCN1L_HUMAN	292.764	1	48	55	115	0.00158	0.194	GAAYGLAGLVK	0.997	49.1	25	36	2	0	0	1019.59	1396	1406
Translational activator GCN1 GN=GCN1L1	GCN1L_HUMAN	292.764	1	48	55	115	0.00158	0.194	AVMSNLSAHGVK	0.997	59.6	25	53.6	4	0	0	1213.64	1485	1496
Translational activator GCN1 GN=GCN1L1	GCN1L_HUMAN	292.764	1	48	55	115	0.00158	0.194	AGSVELLGAMAYCAPK	0.997	73.8	25	73.8	5	0	0	1637.8	1515	1530
Translational activator GCN1 GN=GCN1L1	GCN1L_HUMAN	292.764	1	48	55	115	0.00158	0.194	QLSSCLPNIVPK	0.997	37.7	25	36	2	0	0	1355.74	1531	1542
Translational activator GCN1 GN=GCN1L1	GCN1L_HUMAN	292.764	1	48	55	115	0.00158	0.194	LTEVLTDSHVK	0.997	59.2	25	50.5	3	1	0	1241.67	1543	1553
Translational activator GCN1 GN=GCN1L1	GCN1L_HUMAN	292.764	1	48	55	115	0.00158	0.194	LTEVLTDSHVKVQK	0.997	32.9	25	32.9	0	2	0	1596.9	1543	1556
Translational activator GCN1 GN=GCN1L1	GCN1L_HUMAN	292.764	1	48	55	115	0.00158	0.194	ASLLDPVPEVR	0.997	45	25	36.4	5	0	0	1195.67	1664	1674
Translational activator GCN1 GN=GCN1L1	GCN1L_HUMAN	292.764	1	48	55	115	0.00158	0.194	LMPEIVATASK	0.992	26.2	25	20.3	1	0	0	1159.64	1735	1745
Translational activator GCN1 GN=GCN1L1	GCN1L_HUMAN	292.764	1	48	55	115	0.00158	0.194	VDIAPHVR	0.992	25.6	25	21.7	2	0	0	906.516	1746	1753
Translational activator GCN1 GN=GCN1L1	GCN1L_HUMAN	292.764	1	48	55	115	0.00158	0.194	ALADENEFVR	0.996	32.1	25	24.2	2	0	0	1163.57	1785	1794
Translational activator GCN1 GN=GCN1L1	GCN1L_HUMAN	292.764	1	48	55	115	0.00158	0.194	ALADENEFVRDTALR	0.997	28.8	25	24.9	0	2	0	1719.87	1785	1799
Translational activator GCN1 GN=GCN1L1	GCN1L_HUMAN	292.764	1	48	55	115	0.00158	0.194	AIITALGVER	0.997	45.5	25	35.7	1	0	0	1042.63	1872	1881
Translational activator GCN1 GN=GCN1L1	GCN1L_HUMAN	292.764	1	48	55	115	0.00158	0.194	AIITALGVERR	0.993	26	25	20.8	1	0	0	1198.73	1872	1882
Translational activator GCN1 GN=GCN1L1	GCN1L_HUMAN	292.764	1	48	55	115	0.00158	0.194	VLAGLYMGR	0.997	40.2	25	38.9	2	0	0	995.534	1885	1893
Translational activator GCN1 GN=GCN1L1	GCN1L_HUMAN	292.764	1	48	55	115	0.00158	0.194	SDTQLVVR	0.997	44.9	25	2.54	4	0	0	917.505	1894	1901
Translational activator GCN1 GN=GCN1L1	GCN1L_HUMAN	292.764	1	48	55	115	0.00158	0.194	DAVLYFSESLVPTAR	0.981	23.6	25	18.4	1	0	0	1667.86	1997	2011
Translational activator GCN1 GN=GCN1L1	GCN1L_HUMAN	292.764	1	48	55	115	0.00158	0.194	VLAFLSSVAGDALTR	0.997	64	25	64	2	0	0	1519.85	2093	2107
Translational activator GCN1 GN=GCN1L1	GCN1L_HUMAN	292.764	1	48	55	115	0.00158	0.194	QAAAIILNIYCSR	0.997	61	25	60.5	4	0	0	1492.79	2169	2181
Translational activator GCN1 GN=GCN1L1	GCN1L_HUMAN	292.764	1	48	55	115	0.00158	0.194	SKADYTSHLR	0.996	29.4	25	24.4	2	0	0	1177.6	2182	2191
Translational activator GCN1 GN=GCN1L1	GCN1L_HUMAN	292.764	1	48	55	115	0.00158	0.194	SLVSGLIR	0.997	39.4	25	17	2	0	0	844.525	2192	2199
Translational activator GCN1 GN=GCN1L1	GCN1L_HUMAN	292.764	1	48	55	115	0.00158	0.194	KGVTSILPVLR	0.997	42.1	25	38.6	2	0	0	1182.76	2259	2269
Translational activator GCN1 GN=GCN1L1	GCN1L_HUMAN	292.764	1	48	55	115	0.00158	0.194	GVTSILPVLR	0.961	22.5	25	22.5	1	0	0	1054.66	2260	2269
Translational activator GCN1 GN=GCN1L1	GCN1L_HUMAN	292.764	1	48	55	115	0.00158	0.194	EGVLTGSPEQKEEAAK	0.997	51.2	25	45.8	2	1	0	1672.84	2270	2285
Translational activator GCN1 GN=GCN1L1	GCN1L_HUMAN	292.764	1	48	55	115	0.00158	0.194	LTSADALRPSVVSITGPLIR	0.997	31.8	25	31.8	0	4	0	2066.2	2293	2312
Translational activator GCN1 GN=GCN1L1	GCN1L_HUMAN	292.764	1	48	55	115	0.00158	0.194	HHIETGGGQLPAK	0.995	27.3	25	19.4	1	0	0	1344.7	2538	2550
Translational activator GCN1 GN=GCN1L1	GCN1L_HUMAN	292.764	1	48	55	115	0.00158	0.194	AYSDQAIVNLLK	0.997	82.1	25	63.9	2	0	0	1334.73	2610	2621
Translational activator GCN1 GN=GCN1L1	GCN1L_HUMAN	292.764	1	48	55	115	0.00158	0.194	QGEEVFQSLSK	0.997	35.5	25	33.9	1	0	0	1251.62	2624	2634
Graves disease carrier protein GN=SLC25A16	GDC_HUMAN	36.2246	0.998	2	2	3	4.12e-05	0.0633	SFLAGGIAGCCAK	0.997	53.1	25	53.1	2	0	0	1311.62	39	51
Graves disease carrier protein GN=SLC25A16	GDC_HUMAN	36.2246	0.998	2	2	3	4.12e-05	0.0633	GLSLNYIR	0.975	23.2	25	13.4	1	0	0	935.531	303	310
Gem-associated protein 2 GN=GEMIN2	GEMI2_HUMAN	31.585	0.998	2	2	3	4.12e-05	0.0857	SQQLDSNVTMPK	0.997	41.3	25	29.8	2	0	0	1347.66	126	137
Gem-associated protein 2 GN=GEMIN2	GEMI2_HUMAN	31.585	0.998	2	2	3	4.12e-05	0.0857	YFDQRDLADEPS	0.991	28.3	25	28.3	1	0	0	1455.64	269	280
Glutamine--fructose-6-phosphate aminotransferase [isomerizing] 1 GN=GFPT1	GFPT1_HUMAN	78.8077	1	4	4	7	9.62e-05	0.073	GSPLLIGVR	0.987	26.7	25	14	1	0	0	911.567	204	212
Glutamine--fructose-6-phosphate aminotransferase [isomerizing] 1 GN=GFPT1	GFPT1_HUMAN	78.8077	1	4	4	7	9.62e-05	0.073	AVQTLQMELQQIMK	0.997	42	25	42	2	0	0	1660.88	323	336
Glutamine--fructose-6-phosphate aminotransferase [isomerizing] 1 GN=GFPT1	GFPT1_HUMAN	78.8077	1	4	4	7	9.62e-05	0.073	GALTVGITNTVGSSISR	0.997	94.5	25	94.5	2	0	0	1632.89	458	474
Glutamine--fructose-6-phosphate aminotransferase [isomerizing] 1 GN=GFPT1	GFPT1_HUMAN	78.8077	1	4	4	7	9.62e-05	0.073	CQNALQQVVAR	0.997	70.7	25	54.8	2	0	0	1286.66	620	630
Mitochondrial glutamate carrier 1 GN=SLC25A22	GHC1_HUMAN	34.4712	1	9	9	16	0.00022	0.353	VYTSMSDCLIK	0.997	45.7	25	38	2	0	0	1316.62	45	55
Mitochondrial glutamate carrier 1 GN=SLC25A22	GHC1_HUMAN	34.4712	1	9	9	16	0.00022	0.353	SEGYFGMYR	0.996	30.7	25	30.7	2	0	0	1109.47	59	67
Mitochondrial glutamate carrier 1 GN=SLC25A22	GHC1_HUMAN	34.4712	1	9	9	16	0.00022	0.353	GAAVNLTLVTPEK	0.997	41.7	25	32.9	2	0	0	1312.75	68	80
Mitochondrial glutamate carrier 1 GN=SLC25A22	GHC1_HUMAN	34.4712	1	9	9	16	0.00022	0.353	LAANDFFR	0.997	47.7	25	39.8	2	0	0	953.484	84	91
Mitochondrial glutamate carrier 1 GN=SLC25A22	GHC1_HUMAN	34.4712	1	9	9	16	0.00022	0.353	IQLQDAGR	0.997	46.1	25	24.2	2	0	0	900.49	129	136
Mitochondrial glutamate carrier 1 GN=SLC25A22	GHC1_HUMAN	34.4712	1	9	9	16	0.00022	0.353	ILAAQGQLSAQGGAQPSVEAPAAPRPTATQLTR	0.997	107	25	107	0	1	0	3256.74	143	175
Mitochondrial glutamate carrier 1 GN=SLC25A22	GHC1_HUMAN	34.4712	1	9	9	16	0.00022	0.353	GLGATLLR	0.996	28.6	25	13.6	2	0	0	800.499	189	196
Mitochondrial glutamate carrier 1 GN=SLC25A22	GHC1_HUMAN	34.4712	1	9	9	16	0.00022	0.353	GVNEDTYSGILDCAR	0.997	71.3	25	71.3	2	0	0	1669.75	259	273
Mitochondrial glutamate carrier 1 GN=SLC25A22	GHC1_HUMAN	34.4712	1	9	9	16	0.00022	0.353	HEGPSAFLK	0.957	20.5	25	10.7	1	0	0	985.51	278	286
Serine hydroxymethyltransferase, mitochondrial GN=SHMT2	GLYM_HUMAN	55.9947	1	3	3	7	9.62e-05	0.0694	TGLIDYNQLALTAR	0.997	77.1	25	74.8	2	0	0	1548.84	201	214
Serine hydroxymethyltransferase, mitochondrial GN=SHMT2	GLYM_HUMAN	55.9947	1	3	3	7	9.62e-05	0.0694	LIIAGTSAYAR	0.997	47.4	25	47.4	4	0	0	1135.65	220	230
Serine hydroxymethyltransferase, mitochondrial GN=SHMT2	GLYM_HUMAN	55.9947	1	3	3	7	9.62e-05	0.0694	AFPMPGFDEH	0.982	22.9	25	22.9	1	0	0	1163.48	495	504
Putative oxidoreductase GLYR1 GN=GLYR1	GLYR1_HUMAN	60.5576	1	6	7	12	0.000165	0.134	FQQAVDAVEEFLR	0.997	77.1	25	62.4	2	0	0	1551.78	79	91
Putative oxidoreductase GLYR1 GN=GLYR1	GLYR1_HUMAN	60.5576	1	6	7	12	0.000165	0.134	TAEKCDLFIQEGAR	0.997	49.9	25	45.8	1	1	0	1637.8	299	312
Putative oxidoreductase GLYR1 GN=GLYR1	GLYR1_HUMAN	60.5576	1	6	7	12	0.000165	0.134	AAKDLVLGPSGVLQGIRPGK	0.995	20.6	25	20.6	0	1	0	1976.17	336	355
Putative oxidoreductase GLYR1 GN=GLYR1	GLYR1_HUMAN	60.5576	1	6	7	12	0.000165	0.134	DLVLGPSGVLQGIRPGK	0.997	65.4	25	65.4	2	0	0	1706	339	355
Putative oxidoreductase GLYR1 GN=GLYR1	GLYR1_HUMAN	60.5576	1	6	7	12	0.000165	0.134	TSFFLGEVGNAAK	0.997	79.9	25	76.7	4	0	0	1340.68	423	435
Putative oxidoreductase GLYR1 GN=GLYR1	GLYR1_HUMAN	60.5576	1	6	7	12	0.000165	0.134	ALDQSDNDMSAVYR	0.997	44.9	25	44.9	1	0	0	1584.7	536	549
GDP-mannose 4,6 dehydratase GN=GMDS	GMDS_HUMAN	41.95	1	3	3	6	8.24e-05	0.086	GSGDGEMGKPR	0.996	29.9	25	25.5	2	0	0	1090.49	13	23
GDP-mannose 4,6 dehydratase GN=GMDS	GMDS_HUMAN	41.95	1	3	3	6	8.24e-05	0.086	TCGLINSVK	0.989	25.4	25	16.2	2	0	0	991.524	141	149
GDP-mannose 4,6 dehydratase GN=GMDS	GMDS_HUMAN	41.95	1	3	3	6	8.24e-05	0.086	FYQASTSELYGK	0.997	60.3	25	60	2	0	0	1393.66	150	161
Mannose-1-phosphate guanyltransferase alpha GN=GMPPA	GMPPA_HUMAN	46.2918	1	3	3	5	6.87e-05	0.0929	AVILIGGPQK	0.997	40.1	25	40.1	2	0	0	995.625	4	13
Mannose-1-phosphate guanyltransferase alpha GN=GMPPA	GMPPA_HUMAN	46.2918	1	3	3	5	6.87e-05	0.0929	VAPSAVLGPNVSIGK	0.997	43.8	25	43.8	1	0	0	1408.82	295	309
Mannose-1-phosphate guanyltransferase alpha GN=GMPPA	GMPPA_HUMAN	46.2918	1	3	3	5	6.87e-05	0.0929	VEGTPSDPNPNDPR	0.997	34.8	25	20.9	2	0	0	1494.68	353	366
Mannose-1-phosphate guanyltransferase beta GN=GMPPB	GMPPB_HUMAN	39.834	0.998	2	2	3	4.12e-05	0.0806	ALILVGGYGTR	0.997	36.1	25	36.1	2	0	0	1119.65	3	13
Mannose-1-phosphate guanyltransferase beta GN=GMPPB	GMPPB_HUMAN	39.834	0.998	2	2	3	4.12e-05	0.0806	LCSGPGIVGNVLVDPSAR	0.997	38.2	25	38.2	1	0	0	1810.95	244	261
Guanine nucleotide-binding protein G(k) subunit alpha GN=GNAI3	GNAI3_HUMAN	40.5335	0.998	2	2	3	4.12e-05	0.116	LLLLGAGESGK	0.997	58	25	0	9	0	0	1057.63	36	46
Guanine nucleotide-binding protein G(k) subunit alpha GN=GNAI3	GNAI3_HUMAN	40.5335	0.998	2	2	3	4.12e-05	0.116	LLLLGAGESGKSTIVK	0.997	31	25	31	1	0	0	1585.95	36	51
Guanine nucleotide-binding protein G(k) subunit alpha GN=GNAI3	GNAI3_HUMAN	40.5335	0.998	2	2	3	4.12e-05	0.116	DGGVQACFSR	0.997	57.5	25	53.5	2	0	0	1096.48	133	142
Guanine nucleotide-binding protein G(k) subunit alpha GN=GNAI3	GNAI3_HUMAN	40.5335	0.998	2	2	3	4.12e-05	0.116	ISQSNYIPTQQDVLR	0.993	31	25	21.7	1	0	0	1761.91	162	176
Guanine nucleotide-binding protein G(s) subunit alpha isoforms short GN=GNAS	GNAS2_HUMAN	45.6654	1	4	4	13	0.000179	0.117	LLLLGAGESGK	0.997	58	25	0	9	0	0	1057.63	43	53
Guanine nucleotide-binding protein G(s) subunit alpha isoforms short GN=GNAS	GNAS2_HUMAN	45.6654	1	4	4	13	0.000179	0.117	LLLLGAGESGKSTIVK	0.997	31	25	31	1	0	0	1585.95	43	58
Guanine nucleotide-binding protein G(s) subunit alpha isoforms short GN=GNAS	GNAS2_HUMAN	45.6654	1	4	4	13	0.000179	0.117	YTTPEDATPEPGEDPRVTR	0.984	17	25	16.4	0	2	0	2130.99	318	336
Guanine nucleotide-binding protein G(s) subunit alpha isoforms short GN=GNAS	GNAS2_HUMAN	45.6654	1	4	4	13	0.000179	0.117	VFNDCRDIIQR	0.991	25.7	25	18.8	1	0	0	1435.71	375	385
Guanine nucleotide-binding protein-like 3 GN=GNL3	GNL3_HUMAN	61.9947	1	5	6	16	0.00022	0.106	ELPTVVFR	0.997	41.9	25	27.1	4	0	0	960.551	198	205
Guanine nucleotide-binding protein-like 3 GN=GNL3	GNL3_HUMAN	61.9947	1	5	6	16	0.00022	0.106	LLGGFQETCSK	0.97	20.7	25	20.7	1	0	0	1239.6	243	253
Guanine nucleotide-binding protein-like 3 GN=GNL3	GNL3_HUMAN	61.9947	1	5	6	16	0.00022	0.106	VGVIGFPNVGK	0.997	41	25	33.6	7	0	0	1086.63	257	267
Guanine nucleotide-binding protein-like 3 GN=GNL3	GNL3_HUMAN	61.9947	1	5	6	16	0.00022	0.106	GGIPNVEGAAK	0.951	20	25	16.7	1	0	0	1012.54	378	388
Guanine nucleotide-binding protein-like 3 GN=GNL3	GNL3_HUMAN	61.9947	1	5	6	16	0.00022	0.106	SGFNLEELEKNNAQSIR	0.997	53.7	25	53.7	1	2	0	1948.97	425	441
Guanine nucleotide-binding protein-like 3-like protein GN=GNL3L	GNL3L_HUMAN	65.5733	1	3	3	4	5.49e-05	0.0773	TIESYCQDVLR	0.997	50.8	25	44.3	1	0	0	1383.66	84	94
Guanine nucleotide-binding protein-like 3-like protein GN=GNL3L	GNL3L_HUMAN	65.5733	1	3	3	4	5.49e-05	0.0773	LLDAPGIVPGPNSEVGTILR	0.996	28.5	25	28.5	1	0	0	2018.13	301	320
Guanine nucleotide-binding protein-like 3-like protein GN=GNL3L	GNL3L_HUMAN	65.5733	1	3	3	4	5.49e-05	0.0773	LADPVTPVETILQR	0.997	33.7	25	33.7	2	0	0	1551.87	328	341
GPI-anchor transamidase GN=PIGK	GPI8_HUMAN	45.2528	1	3	3	5	6.87e-05	0.0785	HVANTLSVYR	0.987	30.5	25	30.5	2	0	0	1159.62	61	70
GPI-anchor transamidase GN=PIGK	GPI8_HUMAN	45.2528	1	3	3	5	6.87e-05	0.0785	SYEVTVENFLR	0.997	39.9	25	36.1	1	0	0	1356.68	123	133
GPI-anchor transamidase GN=PIGK	GPI8_HUMAN	45.2528	1	3	3	5	6.87e-05	0.0785	SLCVSTPGHR	0.99	25.3	25	25.3	2	0	0	1113.55	278	287
Girdin GN=CCDC88A	GRDN_HUMAN	216.048	1	6	6	11	0.000151	0.047	KEEFIER	0.997	32.8	25	26.3	2	0	0	950.494	138	144
Girdin GN=CCDC88A	GRDN_HUMAN	216.048	1	6	6	11	0.000151	0.047	LQQENMNLLSDAR	0.997	60.7	25	58.1	2	0	0	1531.75	291	303
Girdin GN=CCDC88A	GRDN_HUMAN	216.048	1	6	6	11	0.000151	0.047	TSELSEAPQK	0.997	55.9	25	48	3	0	0	1089.54	439	448
Girdin GN=CCDC88A	GRDN_HUMAN	216.048	1	6	6	11	0.000151	0.047	SLGHEVNELTSSR	0.997	49.6	25	49.6	2	0	0	1428.71	449	461
Girdin GN=CCDC88A	GRDN_HUMAN	216.048	1	6	6	11	0.000151	0.047	ILEQENEHLNQTVSSLR	0.997	38.2	25	35.6	0	1	0	2010.03	555	571
Girdin GN=CCDC88A	GRDN_HUMAN	216.048	1	6	6	11	0.000151	0.047	NLEELKISSK	0.997	42.2	25	38.7	2	0	0	1160.65	799	808
Girdin GN=CCDC88A	GRDN_HUMAN	216.048	1	6	6	11	0.000151	0.047	QTVSLQEQNTTLQTQNAK	0.997	35.3	25	35.3	1	0	0	2032.03	1089	1106
Stress-70 protein, mitochondrial GN=HSPA9	GRP75_HUMAN	73.6813	1	21	28	47	0.000646	0.321	VLENAEGAR	0.997	73	25	62.4	2	0	0	958.495	77	85
Stress-70 protein, mitochondrial GN=HSPA9	GRP75_HUMAN	73.6813	1	21	28	47	0.000646	0.321	TTPSVVAFTADGER	0.997	67.5	25	67.5	2	0	0	1450.72	86	99
Stress-70 protein, mitochondrial GN=HSPA9	GRP75_HUMAN	73.6813	1	21	28	47	0.000646	0.321	LVGMPAKR	0.969	24.5	25	17.2	1	0	0	871.518	100	107
Stress-70 protein, mitochondrial GN=HSPA9	GRP75_HUMAN	73.6813	1	21	28	47	0.000646	0.321	QAVTNPNNTFYATK	0.997	73.8	25	67.5	2	0	0	1568.77	108	121
Stress-70 protein, mitochondrial GN=HSPA9	GRP75_HUMAN	73.6813	1	21	28	47	0.000646	0.321	QAVTNPNNTFYATKR	0.997	44.9	25	43.7	2	2	0	1724.87	108	122
Stress-70 protein, mitochondrial GN=HSPA9	GRP75_HUMAN	73.6813	1	21	28	47	0.000646	0.321	RYDDPEVQK	0.997	40.1	25	38.2	1	0	0	1149.55	127	135
Stress-70 protein, mitochondrial GN=HSPA9	GRP75_HUMAN	73.6813	1	21	28	47	0.000646	0.321	NVPFKIVR	0.969	21	25	20.1	1	0	0	972.599	139	146
Stress-70 protein, mitochondrial GN=HSPA9	GRP75_HUMAN	73.6813	1	21	28	47	0.000646	0.321	LYSPSQIGAFVLMK	0.963	25.4	25	25.4	1	0	0	1553.84	160	173
Stress-70 protein, mitochondrial GN=HSPA9	GRP75_HUMAN	73.6813	1	21	28	47	0.000646	0.321	MKETAENYLGHTAK	0.997	62.8	25	54.3	1	0	0	1592.77	174	187
Stress-70 protein, mitochondrial GN=HSPA9	GRP75_HUMAN	73.6813	1	21	28	47	0.000646	0.321	NAVITVPAYFNDSQR	0.997	51.5	25	51.5	2	0	0	1694.85	188	202
Stress-70 protein, mitochondrial GN=HSPA9	GRP75_HUMAN	73.6813	1	21	28	47	0.000646	0.321	QATKDAGQISGLNVLR	0.997	43.7	25	43.7	2	2	0	1670.92	203	218
Stress-70 protein, mitochondrial GN=HSPA9	GRP75_HUMAN	73.6813	1	21	28	47	0.000646	0.321	DAGQISGLNVLR	0.997	75.2	25	57.4	2	0	0	1242.68	207	218
Stress-70 protein, mitochondrial GN=HSPA9	GRP75_HUMAN	73.6813	1	21	28	47	0.000646	0.321	VINEPTAAALAYGLDK	0.997	61.6	25	61.6	1	0	0	1645.88	219	234
Stress-70 protein, mitochondrial GN=HSPA9	GRP75_HUMAN	73.6813	1	21	28	47	0.000646	0.321	STNGDTFLGGEDFDQALLR	0.997	72.1	25	72.1	2	0	0	2055.96	266	284
Stress-70 protein, mitochondrial GN=HSPA9	GRP75_HUMAN	73.6813	1	21	28	47	0.000646	0.321	ETGVDLTKDNMALQR	0.997	44.2	25	43.1	4	4	0	1706.84	293	307
Stress-70 protein, mitochondrial GN=HSPA9	GRP75_HUMAN	73.6813	1	21	28	47	0.000646	0.321	AQFEGIVTDLIR	0.997	71	25	71	2	0	0	1361.74	349	360
Stress-70 protein, mitochondrial GN=HSPA9	GRP75_HUMAN	73.6813	1	21	28	47	0.000646	0.321	AQFEGIVTDLIRR	0.984	23.6	25	16.3	1	1	0	1517.84	349	361
Stress-70 protein, mitochondrial GN=HSPA9	GRP75_HUMAN	73.6813	1	21	28	47	0.000646	0.321	VQQTVQDLFGR	0.997	59.2	25	47.1	2	0	0	1290.68	395	405
Stress-70 protein, mitochondrial GN=HSPA9	GRP75_HUMAN	73.6813	1	21	28	47	0.000646	0.321	VQQTVQDLFGRAPSK	0.997	74.3	25	74.3	2	2	0	1673.9	395	409
Stress-70 protein, mitochondrial GN=HSPA9	GRP75_HUMAN	73.6813	1	21	28	47	0.000646	0.321	NTTIPTKK	0.976	23.4	25	7.97	1	0	0	902.531	461	468
Stress-70 protein, mitochondrial GN=HSPA9	GRP75_HUMAN	73.6813	1	21	28	47	0.000646	0.321	KDSETGENIR	0.997	43.6	25	36.8	2	0	0	1148.55	625	634
78 kDa glucose-regulated protein GN=HSPA5	GRP78_HUMAN	72.3347	1	16	23	45	0.000618	0.315	VEIIANDQGNR	0.973	26.1	25	0	1	0	0	1228.63	50	60
78 kDa glucose-regulated protein GN=HSPA5	GRP78_HUMAN	72.3347	1	16	23	45	0.000618	0.315	ITPSYVAFTPEGER	0.997	51.9	25	51.9	1	0	0	1566.78	61	74
78 kDa glucose-regulated protein GN=HSPA5	GRP78_HUMAN	72.3347	1	16	23	45	0.000618	0.315	NQLTSNPENTVFDAK	0.997	68.5	25	57.4	2	0	0	1677.81	82	96
78 kDa glucose-regulated protein GN=HSPA5	GRP78_HUMAN	72.3347	1	16	23	45	0.000618	0.315	NQLTSNPENTVFDAKR	0.997	55.5	25	54.3	1	2	0	1833.91	82	97
78 kDa glucose-regulated protein GN=HSPA5	GRP78_HUMAN	72.3347	1	16	23	45	0.000618	0.315	KTKPYIQVDIGGGQTK	0.994	22.5	25	16	0	1	0	1732.96	123	138
78 kDa glucose-regulated protein GN=HSPA5	GRP78_HUMAN	72.3347	1	16	23	45	0.000618	0.315	TKPYIQVDIGGGQTK	0.997	67.7	25	62.5	2	0	0	1604.86	124	138
78 kDa glucose-regulated protein GN=HSPA5	GRP78_HUMAN	72.3347	1	16	23	45	0.000618	0.315	TFAPEEISAMVLTK	0.997	70.4	25	62.9	5	0	0	1552.79	139	152
78 kDa glucose-regulated protein GN=HSPA5	GRP78_HUMAN	72.3347	1	16	23	45	0.000618	0.315	VTHAVVTVPAYFNDAQR	0.997	63.2	25	63.2	2	2	0	1887.97	165	181
78 kDa glucose-regulated protein GN=HSPA5	GRP78_HUMAN	72.3347	1	16	23	45	0.000618	0.315	QATKDAGTIAGLNVMR	0.997	37.1	25	37.1	2	3	0	1645.87	182	197
78 kDa glucose-regulated protein GN=HSPA5	GRP78_HUMAN	72.3347	1	16	23	45	0.000618	0.315	DAGTIAGLNVMR	0.997	39.5	25	35	3	0	0	1233.63	186	197
78 kDa glucose-regulated protein GN=HSPA5	GRP78_HUMAN	72.3347	1	16	23	45	0.000618	0.315	IINEPTAAAIAYGLDK	0.997	75.5	25	75.5	2	0	0	1659.9	198	213
78 kDa glucose-regulated protein GN=HSPA5	GRP78_HUMAN	72.3347	1	16	23	45	0.000618	0.315	IINEPTAAAIAYGLDKR	0.997	60.1	25	60.1	2	2	0	1816	198	214
78 kDa glucose-regulated protein GN=HSPA5	GRP78_HUMAN	72.3347	1	16	23	45	0.000618	0.315	ALSSQHQAR	0.997	41.5	25	37.7	2	0	0	997.517	298	306
78 kDa glucose-regulated protein GN=HSPA5	GRP78_HUMAN	72.3347	1	16	23	45	0.000618	0.315	IEIESFYEGEDFSETLTR	0.997	64.6	25	64.6	1	0	0	2164.99	307	324
78 kDa glucose-regulated protein GN=HSPA5	GRP78_HUMAN	72.3347	1	16	23	45	0.000618	0.315	AKFEELNMDLFR	0.997	70.8	25	70.3	2	2	0	1512.75	325	336
78 kDa glucose-regulated protein GN=HSPA5	GRP78_HUMAN	72.3347	1	16	23	45	0.000618	0.315	SQIFSTASDNQPTVTIK	0.997	90.1	25	85.9	4	0	0	1836.93	448	464
78 kDa glucose-regulated protein GN=HSPA5	GRP78_HUMAN	72.3347	1	16	23	45	0.000618	0.315	ITITNDQNRLTPEEIER	0.986	20	25	20	0	2	0	2042.05	524	540
78 kDa glucose-regulated protein GN=HSPA5	GRP78_HUMAN	72.3347	1	16	23	45	0.000618	0.315	ELEEIVQPIISK	0.997	36.6	25	25.1	2	0	0	1397.79	622	633
Glioma tumor suppressor candidate region gene 2 protein GN=GLTSCR2	GSCR2_HUMAN	54.3907	0.999	2	2	3	4.12e-05	0.0418	DVLAHQVPNAK	0.996	28.9	25	28.9	1	0	0	1191.65	133	143
Glioma tumor suppressor candidate region gene 2 protein GN=GLTSCR2	GSCR2_HUMAN	54.3907	0.999	2	2	3	4.12e-05	0.0418	LRVQQAALR	0.997	39.9	25	32.7	2	0	0	1054.65	351	359
GTP-binding protein 10 GN=GTPBP10	GTPBA_HUMAN	42.9348	1	2	2	3	4.12e-05	0.0517	GGSGGMGYPR	0.997	34	25	23.9	1	0	0	938.415	25	34
GTP-binding protein 10 GN=GTPBP10	GTPBA_HUMAN	42.9348	1	2	2	3	4.12e-05	0.0517	FVAGVGANSK	0.997	30.1	25	16.5	2	0	0	949.51	67	76
Glycogen [starch] synthase, muscle GN=GYS1	GYS1_HUMAN	83.7871	1	2	3	5	6.87e-05	0.0339	TQVELLEAPTPALKR	0.997	55.4	25	55.4	2	2	0	1665.95	75	89
Glycogen [starch] synthase, muscle GN=GYS1	GYS1_HUMAN	83.7871	1	2	3	5	6.87e-05	0.0339	TNNFNVETLK	0.977	21.5	25	17.7	1	0	0	1179.6	372	381
Histone H1.2 GN=HIST1H1C	H12_HUMAN	21.3658	1	17	19	289	0.00397	0.549	SETAPAAPAAAPPAEK	0.964	22.9	25	0	1	0	0	1478.75	2	17
Histone H1.2 GN=HIST1H1C	H12_HUMAN	21.3658	1	17	19	289	0.00397	0.549	KASGPPVSELITK	0.997	85.8	25	81.1	34	4	0	1326.76	34	46
Histone H1.2 GN=HIST1H1C	H12_HUMAN	21.3658	1	17	19	289	0.00397	0.549	ASGPPVSELITK	0.997	69.6	25	64.9	21	0	0	1198.67	35	46
Histone H1.2 GN=HIST1H1C	H12_HUMAN	21.3658	1	17	19	289	0.00397	0.549	AVAASKER	0.997	59.8	25	41.7	2	0	0	831.468	47	54
Histone H1.2 GN=HIST1H1C	H12_HUMAN	21.3658	1	17	19	289	0.00397	0.549	SGVSLAALK	0.997	55.7	25	33.4	13	0	0	845.509	55	63
Histone H1.2 GN=HIST1H1C	H12_HUMAN	21.3658	1	17	19	289	0.00397	0.549	SGVSLAALKK	0.997	71.9	25	68.2	37	0	0	973.604	55	64
Histone H1.2 GN=HIST1H1C	H12_HUMAN	21.3658	1	17	19	289	0.00397	0.549	ALAAAGYDVEK	0.997	68.5	25	55.5	24	0	0	1107.57	65	75
Histone H1.2 GN=HIST1H1C	H12_HUMAN	21.3658	1	17	19	289	0.00397	0.549	ALAAAGYDVEKNNSR	0.997	104	25	104	40	28	0	1578.79	65	79
Histone H1.2 GN=HIST1H1C	H12_HUMAN	21.3658	1	17	19	289	0.00397	0.549	SLVSKGTLVQTK	0.997	68	25	57	34	0	0	1260.75	86	97
Histone H1.2 GN=HIST1H1C	H12_HUMAN	21.3658	1	17	19	289	0.00397	0.549	GTLVQTKGTGASGSFK	0.979	41.1	25	40.9	1	0	0	1538.82	91	106
Histone H1.2 GN=HIST1H1C	H12_HUMAN	21.3658	1	17	19	289	0.00397	0.549	GTGASGSFK	0.997	30.9	25	23.8	9	0	0	811.394	98	106
Histone H1.2 GN=HIST1H1C	H12_HUMAN	21.3658	1	17	19	289	0.00397	0.549	GTGASGSFKLNK	0.997	55.8	25	41.3	30	0	0	1166.62	98	109
Histone H1.2 GN=HIST1H1C	H12_HUMAN	21.3658	1	17	19	289	0.00397	0.549	KAASGEAKPK	0.997	62.6	25	37.1	3	0	0	986.563	110	119
Histone H1.2 GN=HIST1H1C	H12_HUMAN	21.3658	1	17	19	289	0.00397	0.549	KAAGGATPK	0.997	42.8	25	25.2	2	0	0	800.463	140	148
Histone H1.2 GN=HIST1H1C	H12_HUMAN	21.3658	1	17	19	289	0.00397	0.549	AKKPAAATVTK	0.997	37.2	25	33.5	2	0	0	1085.67	158	168
Histone H1.2 GN=HIST1H1C	H12_HUMAN	21.3658	1	17	19	289	0.00397	0.549	KPAAATVTK	0.997	43.5	25	29.8	2	0	0	886.536	160	168
Histone H1.2 GN=HIST1H1C	H12_HUMAN	21.3658	1	17	19	289	0.00397	0.549	KPAAATVTKK	0.997	39.1	25	26.7	2	0	0	1014.63	160	169
Histone H1x GN=H1FX	H1X_HUMAN	22.4879	1	4	5	17	0.000234	0.178	YSQLVVETIR	0.997	72.4	25	58.5	5	0	0	1207.67	48	57
Histone H1x GN=H1FX	H1X_HUMAN	22.4879	1	4	5	17	0.000234	0.178	ALVQNDTLLQVK	0.997	57.2	25	49.8	6	0	0	1341.77	95	106
Histone H1x GN=H1FX	H1X_HUMAN	22.4879	1	4	5	17	0.000234	0.178	RGAPAAATAPAPTAHK	0.991	25.7	25	25.7	1	1	0	1487.81	128	143
Histone H1x GN=H1FX	H1X_HUMAN	22.4879	1	4	5	17	0.000234	0.178	GAPAAATAPAPTAHK	0.997	53.3	25	53.3	4	0	0	1331.71	129	143
Very-long-chain (3R)-3-hydroxyacyl-[acyl-carrier protein] dehydratase 3 GN=PTPLAD1	HACD3_HUMAN	43.1611	1	6	7	25	0.000343	0.116	QVNITVQK	0.997	43.1	25	21.7	4	0	0	929.542	77	84
Very-long-chain (3R)-3-hydroxyacyl-[acyl-carrier protein] dehydratase 3 GN=PTPLAD1	HACD3_HUMAN	43.1611	1	6	7	25	0.000343	0.116	QVNITVQKK	0.96	21.5	25	13.7	1	0	0	1057.64	77	85
Very-long-chain (3R)-3-hydroxyacyl-[acyl-carrier protein] dehydratase 3 GN=PTPLAD1	HACD3_HUMAN	43.1611	1	6	7	25	0.000343	0.116	VSQWWER	0.997	33.2	25	20.4	2	0	0	990.479	86	92
Very-long-chain (3R)-3-hydroxyacyl-[acyl-carrier protein] dehydratase 3 GN=PTPLAD1	HACD3_HUMAN	43.1611	1	6	7	25	0.000343	0.116	LRLESEGSPETLTNLR	0.997	37.7	25	34.4	4	5	0	1814.96	131	146
Very-long-chain (3R)-3-hydroxyacyl-[acyl-carrier protein] dehydratase 3 GN=PTPLAD1	HACD3_HUMAN	43.1611	1	6	7	25	0.000343	0.116	LESEGSPETLTNLR	0.997	82.9	25	79.8	6	0	0	1545.78	133	146
Very-long-chain (3R)-3-hydroxyacyl-[acyl-carrier protein] dehydratase 3 GN=PTPLAD1	HACD3_HUMAN	43.1611	1	6	7	25	0.000343	0.116	FSFTLPYPVK	0.997	33	25	30.6	3	0	0	1198.65	310	319
HAUS augmin-like complex subunit 5 GN=HAUS5	HAUS5_HUMAN	71.683	0.998	2	2	3	4.12e-05	0.0284	MELAQEAR	0.994	27.1	25	10.6	2	0	0	947.462	1	8
HAUS augmin-like complex subunit 5 GN=HAUS5	HAUS5_HUMAN	71.683	0.998	2	2	3	4.12e-05	0.0284	KLELEAAVTR	0.988	24	25	9.55	1	0	0	1129.66	77	86
HCLS1-associated protein X-1 GN=HAX1	HAX1_HUMAN	31.6211	1	4	5	12	0.000165	0.204	GFFGFPGPR	0.994	31.4	25	31.4	4	0	0	981.494	9	17
HCLS1-associated protein X-1 GN=HAX1	HAX1_HUMAN	31.6211	1	4	5	12	0.000165	0.204	IFGGVLESDAR	0.997	64.8	25	57.3	3	0	0	1163.61	140	150
HCLS1-associated protein X-1 GN=HAX1	HAX1_HUMAN	31.6211	1	4	5	12	0.000165	0.204	TREDNDLDSQVSQEGLGPVLQPQPK	0.997	34.4	25	34.1	0	2	0	2750.36	181	205
HCLS1-associated protein X-1 GN=HAX1	HAX1_HUMAN	31.6211	1	4	5	12	0.000165	0.204	ITKPDGIVEERR	0.994	19.2	25	17.6	1	2	0	1412.79	216	227
Hydroxyacyl-coenzyme A dehydrogenase, mitochondrial GN=HADH	HCDH_HUMAN	34.2942	0.998	2	2	3	4.12e-05	0.0669	TFESLVDFSK	0.997	40.8	25	40.8	2	0	0	1172.58	193	202
Hydroxyacyl-coenzyme A dehydrogenase, mitochondrial GN=HADH	HCDH_HUMAN	34.2942	0.998	2	2	3	4.12e-05	0.0669	LLVPYLMEAIR	0.986	23.8	25	23.8	1	0	0	1317.76	222	232
HEAT repeat-containing protein 1 GN=HEATR1	HEAT1_HUMAN	242.379	1	4	4	6	8.24e-05	0.0233	LLESKYPR	0.988	27	25	20.6	2	0	0	1005.57	431	438
HEAT repeat-containing protein 1 GN=HEATR1	HEAT1_HUMAN	242.379	1	4	4	6	8.24e-05	0.0233	LDDTYSFQVINK	0.997	58.3	25	52.6	2	0	0	1442.72	1337	1348
HEAT repeat-containing protein 1 GN=HEATR1	HEAT1_HUMAN	242.379	1	4	4	6	8.24e-05	0.0233	GLVGNPLPSVR	0.954	24	25	22	1	0	0	1108.65	1606	1616
HEAT repeat-containing protein 1 GN=HEATR1	HEAT1_HUMAN	242.379	1	4	4	6	8.24e-05	0.0233	NFGAENPDPFVPVLNTAVK	0.991	28.1	25	28.1	1	0	0	2029.04	1680	1698
HEAT repeat-containing protein 2 GN=HEATR2	HEAT2_HUMAN	93.5224	1	9	10	15	0.000206	0.127	LLPGLEADSKPGR	0.997	59.6	25	57.3	2	0	0	1352.75	34	46
HEAT repeat-containing protein 2 GN=HEATR2	HEAT2_HUMAN	93.5224	1	9	10	15	0.000206	0.127	CLSDPAEGCR	0.995	30.4	25	30.4	2	0	0	1164.48	84	93
HEAT repeat-containing protein 2 GN=HEATR2	HEAT2_HUMAN	93.5224	1	9	10	15	0.000206	0.127	ALAVHLLDLGLRR	0.997	40.7	25	40.7	0	1	0	1446.89	94	106
HEAT repeat-containing protein 2 GN=HEATR2	HEAT2_HUMAN	93.5224	1	9	10	15	0.000206	0.127	LLPALAAR	0.979	22	25	19.4	1	0	0	824.535	117	124
HEAT repeat-containing protein 2 GN=HEATR2	HEAT2_HUMAN	93.5224	1	9	10	15	0.000206	0.127	VAAIEATGAVIHFGNGK	0.947	15.4	25	12.8	0	1	0	1654.89	225	241
HEAT repeat-containing protein 2 GN=HEATR2	HEAT2_HUMAN	93.5224	1	9	10	15	0.000206	0.127	SVDDVLSHFAQR	0.995	30.6	25	28.4	1	0	0	1373.68	242	253
HEAT repeat-containing protein 2 GN=HEATR2	HEAT2_HUMAN	93.5224	1	9	10	15	0.000206	0.127	LFDDVPQVR	0.997	40.6	25	32.8	2	0	0	1088.57	254	262
HEAT repeat-containing protein 2 GN=HEATR2	HEAT2_HUMAN	93.5224	1	9	10	15	0.000206	0.127	TPSASGLLVLASAMR	0.997	52.3	25	51.3	4	0	0	1473.81	447	461
HEAT repeat-containing protein 2 GN=HEATR2	HEAT2_HUMAN	93.5224	1	9	10	15	0.000206	0.127	ACLQPSQDPQMR	0.997	41.1	25	33.2	1	0	0	1430.65	611	622
Helicase-like transcription factor GN=HLTF	HLTF_HUMAN	113.933	1	2	2	3	4.12e-05	0.0278	VILDEGHAIRNPNAQQTK	0.997	26	25	26	0	1	0	2004.06	554	571
Helicase-like transcription factor GN=HLTF	HLTF_HUMAN	113.933	1	2	2	3	4.12e-05	0.0278	INEIRTLIDL	0.997	38.2	25	17.6	2	0	0	1199.7	1000	1009
Heterogeneous nuclear ribonucleoprotein D-like GN=HNRNPDL	HNRDL_HUMAN	46.4386	1	7	9	23	0.000316	0.171	QLAPLLPSLAPSSAR	0.963	21.7	25	21.7	1	0	0	1520.88	37	51
Heterogeneous nuclear ribonucleoprotein D-like GN=HNRNPDL	HNRDL_HUMAN	46.4386	1	7	9	23	0.000316	0.171	HVTAQQPSR	0.984	24.2	25	24.2	1	0	0	1023.53	60	68
Heterogeneous nuclear ribonucleoprotein D-like GN=HNRNPDL	HNRDL_HUMAN	46.4386	1	7	9	23	0.000316	0.171	FGEVVDCTIK	0.997	39.1	25	0	5	0	0	1167.57	171	180
Heterogeneous nuclear ribonucleoprotein D-like GN=HNRNPDL	HNRDL_HUMAN	46.4386	1	7	9	23	0.000316	0.171	FGEVVDCTIKTDPVTGR	0.997	48.2	25	48	3	4	0	1893.94	171	187
Heterogeneous nuclear ribonucleoprotein D-like GN=HNRNPDL	HNRDL_HUMAN	46.4386	1	7	9	23	0.000316	0.171	GFCFITYTDEEPVKK	0.997	42.7	25	33.6	2	0	0	1833.87	275	289
Heterogeneous nuclear ribonucleoprotein D-like GN=HNRNPDL	HNRDL_HUMAN	46.4386	1	7	9	23	0.000316	0.171	VAQPKEVYR	0.997	33.4	25	25.1	2	0	0	1089.61	307	315
Heterogeneous nuclear ribonucleoprotein D-like GN=HNRNPDL	HNRDL_HUMAN	46.4386	1	7	9	23	0.000316	0.171	EVYRQQQQQQK	0.995	27.2	25	23.2	3	2	0	1462.74	312	322
Heterogeneous nuclear ribonucleoprotein H GN=HNRNPH1	HNRH1_HUMAN	49.2298	1	9	10	61	0.000838	0.229	GLPWSCSADEVQR	0.997	56.4	25	54.3	2	0	0	1504.68	17	29
Heterogeneous nuclear ribonucleoprotein H GN=HNRNPH1	HNRH1_HUMAN	49.2298	1	9	10	61	0.000838	0.229	FFSDCKIQNGAQGIR	0.997	28.7	25	26.5	0	3	0	1740.85	30	44
Heterogeneous nuclear ribonucleoprotein H GN=HNRNPH1	HNRH1_HUMAN	49.2298	1	9	10	61	0.000838	0.229	HTGPNSPDTANDGFVR	0.997	70.1	25	66.8	5	7	0	1684.77	99	114
Heterogeneous nuclear ribonucleoprotein H GN=HNRNPH1	HNRH1_HUMAN	49.2298	1	9	10	61	0.000838	0.229	HTGPNSPDTANDGFVRLR	0.996	21.9	25	21.9	0	1	0	1953.95	99	116
Heterogeneous nuclear ribonucleoprotein H GN=HNRNPH1	HNRH1_HUMAN	49.2298	1	9	10	61	0.000838	0.229	STGEAFVQFASQEIAEK	0.997	80.3	25	80.3	17	0	0	1841.89	151	167
Heterogeneous nuclear ribonucleoprotein H GN=HNRNPH1	HNRH1_HUMAN	49.2298	1	9	10	61	0.000838	0.229	IGHRYIEIFK	0.997	36.8	25	30.5	0	2	0	1275.72	176	185
Heterogeneous nuclear ribonucleoprotein H GN=HNRNPH1	HNRH1_HUMAN	49.2298	1	9	10	61	0.000838	0.229	YIEIFKSSR	0.997	40.8	25	39.5	5	0	0	1142.62	180	188
Heterogeneous nuclear ribonucleoprotein H GN=HNRNPH1	HNRH1_HUMAN	49.2298	1	9	10	61	0.000838	0.229	ATENDIYNFFSPLNPVR	0.997	81.9	25	81.9	10	0	0	1996.98	300	316
Heterogeneous nuclear ribonucleoprotein H GN=HNRNPH1	HNRH1_HUMAN	49.2298	1	9	10	61	0.000838	0.229	VHIEIGPDGR	0.997	46.5	25	43.8	9	0	0	1092.58	317	326
Heterogeneous nuclear ribonucleoprotein H3 GN=HNRNPH3	HNRH3_HUMAN	36.9276	1	5	6	13	0.000179	0.188	HNGPNDASDGTVR	0.984	26	25	23.1	1	0	0	1339.6	7	19
Heterogeneous nuclear ribonucleoprotein H3 GN=HNRNPH3	HNRH3_HUMAN	36.9276	1	5	6	13	0.000179	0.188	STGEAFVQFASK	0.997	58.9	25	50.9	6	0	0	1271.63	56	67
Heterogeneous nuclear ribonucleoprotein H3 GN=HNRNPH3	HNRH3_HUMAN	36.9276	1	5	6	13	0.000179	0.188	EIAENALGK	0.988	28.5	25	28.5	2	0	0	944.505	68	76
Heterogeneous nuclear ribonucleoprotein H3 GN=HNRNPH3	HNRH3_HUMAN	36.9276	1	5	6	13	0.000179	0.188	ATENDIANFFSPLNPIR	0.997	38.6	25	38.6	1	0	0	1918.97	206	222
Heterogeneous nuclear ribonucleoprotein H3 GN=HNRNPH3	HNRH3_HUMAN	36.9276	1	5	6	13	0.000179	0.188	DGMDNQGGYGSVGR	0.997	46.8	25	46.8	3	0	0	1428.58	288	301
Heterogeneous nuclear ribonucleoprotein U-like protein 1 GN=HNRNPUL1	HNRL1_HUMAN	95.7397	1	11	13	32	0.00044	0.129	GYFEHREDR	0.994	20.7	25	18.9	0	1	0	1208.54	182	190
Heterogeneous nuclear ribonucleoprotein U-like protein 1 GN=HNRNPUL1	HNRL1_HUMAN	95.7397	1	11	13	32	0.00044	0.129	HLPSTEPDPHVVR	0.997	40.4	25	39.6	1	4	0	1483.77	271	283
Heterogeneous nuclear ribonucleoprotein U-like protein 1 GN=HNRNPUL1	HNRL1_HUMAN	95.7397	1	11	13	32	0.00044	0.129	IQKEALGGQALYPHVLVK	0.997	46.2	25	46.2	0	2	0	1964.13	358	375
Heterogeneous nuclear ribonucleoprotein U-like protein 1 GN=HNRNPUL1	HNRL1_HUMAN	95.7397	1	11	13	32	0.00044	0.129	EALGGQALYPHVLVK	0.997	34	25	34	0	2	0	1594.9	361	375
Heterogeneous nuclear ribonucleoprotein U-like protein 1 GN=HNRNPUL1	HNRL1_HUMAN	95.7397	1	11	13	32	0.00044	0.129	NCAVEFNFGQR	0.997	65.1	25	65.1	4	0	0	1341.6	376	386
Heterogeneous nuclear ribonucleoprotein U-like protein 1 GN=HNRNPUL1	HNRL1_HUMAN	95.7397	1	11	13	32	0.00044	0.129	IRGTVGPK	0.997	32.5	25	24.7	3	0	0	827.51	409	416
Heterogeneous nuclear ribonucleoprotein U-like protein 1 GN=HNRNPUL1	HNRL1_HUMAN	95.7397	1	11	13	32	0.00044	0.129	YNILGTNAIMDK	0.997	58.8	25	54.4	2	0	0	1352.69	450	461
Heterogeneous nuclear ribonucleoprotein U-like protein 1 GN=HNRNPUL1	HNRL1_HUMAN	95.7397	1	11	13	32	0.00044	0.129	YNILGTNAIMDKMR	0.997	50.5	25	50.5	2	1	0	1639.83	450	463
Heterogeneous nuclear ribonucleoprotein U-like protein 1 GN=HNRNPUL1	HNRL1_HUMAN	95.7397	1	11	13	32	0.00044	0.129	NYILDQTNVYGSAQR	0.997	110	25	107	6	0	0	1741.85	501	515
Heterogeneous nuclear ribonucleoprotein U-like protein 1 GN=HNRNPUL1	HNRL1_HUMAN	95.7397	1	11	13	32	0.00044	0.129	AIVICPTDEDLKDR	0.993	19.5	25	18.7	0	1	0	1644.83	528	541
Heterogeneous nuclear ribonucleoprotein U-like protein 1 GN=HNRNPUL1	HNRL1_HUMAN	95.7397	1	11	13	32	0.00044	0.129	AGPPPEKR	0.997	40.6	25	22.4	3	0	0	851.473	601	608
Heterogeneous nuclear ribonucleoprotein U-like protein 2 GN=HNRNPUL2	HNRL2_HUMAN	85.1052	0.998	2	3	5	6.87e-05	0.0308	YNVLGAETVLNQMR	0.997	81.6	25	75.1	3	0	0	1607.82	481	494
Heterogeneous nuclear ribonucleoprotein U-like protein 2 GN=HNRNPUL2	HNRL2_HUMAN	85.1052	0.998	2	3	5	6.87e-05	0.0308	NYYGYQGYR	0.997	34.4	25	34.4	2	0	0	1183.52	739	747
Heterogeneous nuclear ribonucleoproteins C1/C2 GN=HNRNPC	HNRPC_HUMAN	33.6705	1	14	17	64	0.000879	0.363	VFIGNLNTLVVK	0.997	71.9	25	71.8	14	0	0	1316.79	18	29
Heterogeneous nuclear ribonucleoproteins C1/C2 GN=HNRNPC	HNRPC_HUMAN	33.6705	1	14	17	64	0.000879	0.363	VFIGNLNTLVVKK	0.997	47.7	25	47.7	3	0	0	1444.89	18	30
Heterogeneous nuclear ribonucleoproteins C1/C2 GN=HNRNPC	HNRPC_HUMAN	33.6705	1	14	17	64	0.000879	0.363	KSDVEAIFSK	0.997	57.4	25	43.7	5	0	0	1123.6	30	39
Heterogeneous nuclear ribonucleoproteins C1/C2 GN=HNRNPC	HNRPC_HUMAN	33.6705	1	14	17	64	0.000879	0.363	SDVEAIFSK	0.997	50.8	25	43	2	0	0	995.504	31	39
Heterogeneous nuclear ribonucleoproteins C1/C2 GN=HNRNPC	HNRPC_HUMAN	33.6705	1	14	17	64	0.000879	0.363	YGKIVGCSVHK	0.975	23.3	25	17.2	1	0	0	1247.66	40	50
Heterogeneous nuclear ribonucleoproteins C1/C2 GN=HNRNPC	HNRPC_HUMAN	33.6705	1	14	17	64	0.000879	0.363	IVGCSVHK	0.993	26.7	25	24.6	1	0	0	899.477	43	50
Heterogeneous nuclear ribonucleoproteins C1/C2 GN=HNRNPC	HNRPC_HUMAN	33.6705	1	14	17	64	0.000879	0.363	GFAFVQYVNER	0.997	69.3	25	66.3	6	0	0	1329.66	51	61
Heterogeneous nuclear ribonucleoproteins C1/C2 GN=HNRNPC	HNRPC_HUMAN	33.6705	1	14	17	64	0.000879	0.363	AAVAGEDGR	0.997	47.1	25	43.8	4	0	0	845.411	65	73
Heterogeneous nuclear ribonucleoproteins C1/C2 GN=HNRNPC	HNRPC_HUMAN	33.6705	1	14	17	64	0.000879	0.363	AAVAGEDGRMIAGQVLDINLAAEPK	0.997	65.1	25	64.5	0	4	0	2509.31	65	89
Heterogeneous nuclear ribonucleoproteins C1/C2 GN=HNRNPC	HNRPC_HUMAN	33.6705	1	14	17	64	0.000879	0.363	MIAGQVLDINLAAEPK	0.997	96.8	25	96.8	16	2	0	1682.91	74	89
Heterogeneous nuclear ribonucleoproteins C1/C2 GN=HNRNPC	HNRPC_HUMAN	33.6705	1	14	17	64	0.000879	0.363	MYSYPARVPPPPPIAR	0.997	36	25	36	0	1	0	1811.96	136	151
Heterogeneous nuclear ribonucleoproteins C1/C2 GN=HNRNPC	HNRPC_HUMAN	33.6705	1	14	17	64	0.000879	0.363	VPPPPPIAR	0.997	31.8	25	24.6	2	0	0	943.572	143	151
Heterogeneous nuclear ribonucleoproteins C1/C2 GN=HNRNPC	HNRPC_HUMAN	33.6705	1	14	17	64	0.000879	0.363	QKVDSLLENLEK	0.992	27.5	25	24.6	1	0	0	1415.77	205	216
Heterogeneous nuclear ribonucleoproteins C1/C2 GN=HNRNPC	HNRPC_HUMAN	33.6705	1	14	17	64	0.000879	0.363	NDKSEEEQSSSSVK	0.997	44.5	25	44.5	2	0	0	1553.69	230	243
Heterogeneous nuclear ribonucleoprotein D0 GN=HNRNPD	HNRPD_HUMAN	38.4345	1	4	5	14	0.000192	0.118	FGEVVDCTLK	0.997	39.1	25	0	5	0	0	1167.57	120	129
Heterogeneous nuclear ribonucleoprotein D0 GN=HNRNPD	HNRPD_HUMAN	38.4345	1	4	5	14	0.000192	0.118	FGEVVDCTLKLDPITGR	0.997	41.6	25	41.6	1	5	0	1919.99	120	136
Heterogeneous nuclear ribonucleoprotein D0 GN=HNRNPD	HNRPD_HUMAN	38.4345	1	4	5	14	0.000192	0.118	IFVGGLSPDTPEEK	0.997	72.2	25	66.1	5	0	0	1488.76	184	197
Heterogeneous nuclear ribonucleoprotein D0 GN=HNRNPD	HNRPD_HUMAN	38.4345	1	4	5	14	0.000192	0.118	IFVGGLSPDTPEEKIR	0.997	28.8	25	26.3	0	2	0	1757.94	184	199
Heterogeneous nuclear ribonucleoprotein D0 GN=HNRNPD	HNRPD_HUMAN	38.4345	1	4	5	14	0.000192	0.118	KYHNVGLSK	0.958	22.2	25	17.4	1	0	0	1045.58	243	251
Heterogeneous nuclear ribonucleoprotein F GN=HNRNPF	HNRPF_HUMAN	45.6719	1	6	7	14	0.000192	0.236	QSGEAFVELGSEDDVK	0.997	40.6	25	34.7	1	0	0	1709.79	53	68
Heterogeneous nuclear ribonucleoprotein F GN=HNRNPF	HNRPF_HUMAN	45.6719	1	6	7	14	0.000192	0.236	HSGPNSADSANDGFVR	0.997	55.3	25	55.3	2	3	0	1630.72	99	114
Heterogeneous nuclear ribonucleoprotein F GN=HNRNPF	HNRPF_HUMAN	45.6719	1	6	7	14	0.000192	0.236	HSGPNSADSANDGFVRLR	0.997	21.2	25	21.2	0	2	0	1899.91	99	116
Heterogeneous nuclear ribonucleoprotein F GN=HNRNPF	HNRPF_HUMAN	45.6719	1	6	7	14	0.000192	0.236	ITGEAFVQFASQELAEK	0.997	71.2	25	67.1	2	0	0	1867.94	151	167
Heterogeneous nuclear ribonucleoprotein F GN=HNRNPF	HNRPF_HUMAN	45.6719	1	6	7	14	0.000192	0.236	YIEVFKSSQEEVR	0.997	64.4	25	62.2	2	0	0	1613.82	180	192
Heterogeneous nuclear ribonucleoprotein F GN=HNRNPF	HNRPF_HUMAN	45.6719	1	6	7	14	0.000192	0.236	RYIGIVK	0.981	22.8	25	8.09	2	0	0	848.535	218	224
Heterogeneous nuclear ribonucleoprotein F GN=HNRNPF	HNRPF_HUMAN	45.6719	1	6	7	14	0.000192	0.236	ATENDIYNFFSPLNPVR	0.997	81.9	25	81.9	10	0	0	1996.98	300	316
Heterogeneous nuclear ribonucleoprotein F GN=HNRNPF	HNRPF_HUMAN	45.6719	1	6	7	14	0.000192	0.236	VHIEIGPDGR	0.997	46.5	25	43.8	9	0	0	1092.58	317	326
Heterogeneous nuclear ribonucleoprotein K GN=HNRNPK	HNRPK_HUMAN	50.9785	1	13	14	24	0.00033	0.281	RPAEDMEEEQAFKR	0.997	43.5	25	43.5	0	1	0	1735.81	22	35
Heterogeneous nuclear ribonucleoprotein K GN=HNRNPK	HNRPK_HUMAN	50.9785	1	13	14	24	0.00033	0.281	SRNTDEMVELR	0.997	45.2	25	31	2	1	0	1349.65	36	46
Heterogeneous nuclear ribonucleoprotein K GN=HNRNPK	HNRPK_HUMAN	50.9785	1	13	14	24	0.00033	0.281	NAGAVIGKGGK	0.983	25.6	25	13.4	1	0	0	971.563	53	63
Heterogeneous nuclear ribonucleoprotein K GN=HNRNPK	HNRPK_HUMAN	50.9785	1	13	14	24	0.00033	0.281	ALRTDYNASVSVPDSSGPER	0.997	65.9	25	63.9	2	0	0	2121.02	67	86
Heterogeneous nuclear ribonucleoprotein K GN=HNRNPK	HNRPK_HUMAN	50.9785	1	13	14	24	0.00033	0.281	TDYNASVSVPDSSGPER	0.997	69.4	25	69.4	2	0	0	1780.8	70	86
Heterogeneous nuclear ribonucleoprotein K GN=HNRNPK	HNRPK_HUMAN	50.9785	1	13	14	24	0.00033	0.281	IILDLISESPIK	0.997	40.1	25	40.1	2	0	0	1340.8	208	219
Heterogeneous nuclear ribonucleoprotein K GN=HNRNPK	HNRPK_HUMAN	50.9785	1	13	14	24	0.00033	0.281	IILDLISESPIKGR	0.997	49.3	25	43	2	0	0	1553.93	208	221
Heterogeneous nuclear ribonucleoprotein K GN=HNRNPK	HNRPK_HUMAN	50.9785	1	13	14	24	0.00033	0.281	DYDDMSPR	0.997	39.1	25	39.1	2	0	0	998.389	279	286
Heterogeneous nuclear ribonucleoprotein K GN=HNRNPK	HNRPK_HUMAN	50.9785	1	13	14	24	0.00033	0.281	NLPLPPPPPPR	0.982	23	25	11.5	1	0	0	1194.7	306	316
Heterogeneous nuclear ribonucleoprotein K GN=HNRNPK	HNRPK_HUMAN	50.9785	1	13	14	24	0.00033	0.281	GGDLMAYDR	0.997	41.7	25	37.3	1	0	0	997.441	317	325
Heterogeneous nuclear ribonucleoprotein K GN=HNRNPK	HNRPK_HUMAN	50.9785	1	13	14	24	0.00033	0.281	GSYGDLGGPIITTQVTIPK	0.997	74.6	25	73.2	4	0	0	1917.03	378	396
Heterogeneous nuclear ribonucleoprotein K GN=HNRNPK	HNRPK_HUMAN	50.9785	1	13	14	24	0.00033	0.281	GSYGDLGGPIITTQVTIPKDLAGSIIGK	0.973	29.1	25	29.1	0	1	0	2771.52	378	405
Heterogeneous nuclear ribonucleoprotein K GN=HNRNPK	HNRPK_HUMAN	50.9785	1	13	14	24	0.00033	0.281	DLAGSIIGKGGQR	0.997	74.7	25	61.7	2	0	0	1271.71	397	409
Heterogeneous nuclear ribonucleoprotein L GN=HNRNPL	HNRPL_HUMAN	64.1328	1	10	10	21	0.000288	0.2	YYGGGSEGGRAPK	0.997	72.5	25	66	4	0	0	1298.61	47	59
Heterogeneous nuclear ribonucleoprotein L GN=HNRNPL	HNRPL_HUMAN	64.1328	1	10	10	21	0.000288	0.2	ISRPGDSDDSR	0.997	40.5	25	23.4	3	0	0	1204.56	179	189
Heterogeneous nuclear ribonucleoprotein L GN=HNRNPL	HNRPL_HUMAN	64.1328	1	10	10	21	0.000288	0.2	NGVQAMVEFDSVQSAQR	0.997	97.1	25	97.1	1	0	0	1865.88	230	246
Heterogeneous nuclear ribonucleoprotein L GN=HNRNPL	HNRPL_HUMAN	64.1328	1	10	10	21	0.000288	0.2	MGPPVGGHR	0.977	22	25	3.81	1	0	0	907.457	345	353
Heterogeneous nuclear ribonucleoprotein L GN=HNRNPL	HNRPL_HUMAN	64.1328	1	10	10	21	0.000288	0.2	VFNVFCLYGNVEK	0.997	60.8	25	56.3	2	0	0	1588.78	399	411
Heterogeneous nuclear ribonucleoprotein L GN=HNRNPL	HNRPL_HUMAN	64.1328	1	10	10	21	0.000288	0.2	SKPGAAMVEMADGYAVDR	0.991	28.5	25	28.5	1	0	0	1867.87	417	434
Heterogeneous nuclear ribonucleoprotein L GN=HNRNPL	HNRPL_HUMAN	64.1328	1	10	10	21	0.000288	0.2	LNVCVSK	0.982	22.9	25	15.6	1	0	0	819.439	449	455
Heterogeneous nuclear ribonucleoprotein L GN=HNRNPL	HNRPL_HUMAN	64.1328	1	10	10	21	0.000288	0.2	NNRFSTPEQAAK	0.997	48.8	25	41.7	4	0	0	1362.68	482	493
Heterogeneous nuclear ribonucleoprotein L GN=HNRNPL	HNRPL_HUMAN	64.1328	1	10	10	21	0.000288	0.2	VFSGKSER	0.997	34.2	25	24.3	1	0	0	909.479	534	541
Heterogeneous nuclear ribonucleoprotein L GN=HNRNPL	HNRPL_HUMAN	64.1328	1	10	10	21	0.000288	0.2	LCFSTAQHAS	0.997	43.3	25	43.3	3	0	0	1121.5	580	589
Heterogeneous nuclear ribonucleoprotein M GN=HNRNPM	HNRPM_HUMAN	77.5173	1	62	108	350	0.00481	0.656	GEGERPAQNEK	0.997	63.4	25	48.8	4	0	0	1214.58	38	48
Heterogeneous nuclear ribonucleoprotein M GN=HNRNPM	HNRPM_HUMAN	77.5173	1	62	108	350	0.00481	0.656	GEGERPAQNEKR	0.997	43.5	25	33.2	0	4	0	1370.68	38	49
Heterogeneous nuclear ribonucleoprotein M GN=HNRNPM	HNRPM_HUMAN	77.5173	1	62	108	350	0.00481	0.656	GGNRFEPYANPTK	0.997	39.1	25	30.8	2	0	0	1450.71	57	69
Heterogeneous nuclear ribonucleoprotein M GN=HNRNPM	HNRPM_HUMAN	77.5173	1	62	108	350	0.00481	0.656	FEPYANPTKR	0.97	20.6	25	14.7	1	0	0	1222.62	61	70
Heterogeneous nuclear ribonucleoprotein M GN=HNRNPM	HNRPM_HUMAN	77.5173	1	62	108	350	0.00481	0.656	AFITNIPFDVK	0.997	67.3	25	52.7	2	0	0	1264.69	73	83
Heterogeneous nuclear ribonucleoprotein M GN=HNRNPM	HNRPM_HUMAN	77.5173	1	62	108	350	0.00481	0.656	VGEVTYVELLMDAEGK	0.997	63.9	25	54.3	2	0	0	1768.87	95	110
Heterogeneous nuclear ribonucleoprotein M GN=HNRNPM	HNRPM_HUMAN	77.5173	1	62	108	350	0.00481	0.656	GCAVVEFK	0.997	44.3	25	29.6	2	0	0	909.45	113	120
[truncated: 4,472 more rows]

## Sheet: Table S1-2
Supplemental Table S1-2. List of proteins identified in immunoprecipitation product of vector control (Replicate 2)
Protein name and gene name (GN)	Accession number	M.W. (kDa)	Protein probability	No. of unique peptide	No. of unique spectra	No. of total spectra	Percentage of total spectra	Sequence coverage	Peptide sequence	Best peptide probability	Mascot			No. of spectra			Calculated +1H peptide mass (AMU)	Peptide index
											ion score	identity score	delta ion score	+2H	+3H	+4H		start	stop
14-3-3 protein epsilon GN=YWHAE	1433E_HUMAN	29.175	0.998	2	2	3	4.37e-05	0.0902	YLAEFATGNDRK	0.978	28.6	25	21.4	1	0	0	1384.69	131	142
14-3-3 protein epsilon GN=YWHAE	1433E_HUMAN	29.175	0.998	2	2	3	4.37e-05	0.0902	EAAENSLVAYK	0.997	53.3	25	44.5	2	0	0	1194.6	143	153
14-3-3 protein zeta/delta GN=YWHAZ	1433Z_HUMAN	27.7459	1	4	5	8	0.000117	0.229	LAEQAERYDDMAACMK	0.993	30.3	25	30.3	0	1	0	1933.81	12	27
14-3-3 protein zeta/delta GN=YWHAZ	1433Z_HUMAN	27.7459	1	4	5	8	0.000117	0.229	SVTEQGAELSNEER	0.997	88.9	25	78.5	2	0	0	1548.71	28	41
14-3-3 protein zeta/delta GN=YWHAZ	1433Z_HUMAN	27.7459	1	4	5	8	0.000117	0.229	VVSSIEQKTEGAEK	0.997	62.6	25	57.2	2	1	0	1504.79	61	74
14-3-3 protein zeta/delta GN=YWHAZ	1433Z_HUMAN	27.7459	1	4	5	8	0.000117	0.229	YLAEVAAGDDKK	0.997	66	25	55.5	2	0	0	1279.65	128	139
Serine/threonine-protein phosphatase 2A 65 kDa regulatory subunit A alpha isoform GN=PPP2R1A	2AAA_HUMAN	65.3097	1	3	3	5	7.29e-05	0.0645	LSTIALALGVER	0.997	92.3	25	87.1	2	0	0	1242.74	35	46
Serine/threonine-protein phosphatase 2A 65 kDa regulatory subunit A alpha isoform GN=PPP2R1A	2AAA_HUMAN	65.3097	1	3	3	5	7.29e-05	0.0645	TSACGLFSVCYPR	0.997	45.7	25	45.7	2	0	0	1517.69	145	157
Serine/threonine-protein phosphatase 2A 65 kDa regulatory subunit A alpha isoform GN=PPP2R1A	2AAA_HUMAN	65.3097	1	3	3	5	7.29e-05	0.0645	VLAMSGDPNYLHR	0.973	35.6	25	34.4	1	0	0	1472.73	486	498
4F2 cell-surface antigen heavy chain GN=SLC3A2	4F2_HUMAN	67.9964	1	5	7	11	0.00016	0.105	IKVAEDEAEAAAAAK	0.997	67.2	25	67.2	2	2	0	1486.77	146	160
4F2 cell-surface antigen heavy chain GN=SLC3A2	4F2_HUMAN	67.9964	1	5	7	11	0.00016	0.105	VAEDEAEAAAAAK	0.997	42.4	25	42.4	1	0	0	1245.6	148	160
4F2 cell-surface antigen heavy chain GN=SLC3A2	4F2_HUMAN	67.9964	1	5	7	11	0.00016	0.105	FTGLSKEELLK	0.997	31.9	25	31.9	2	1	0	1264.71	161	171
4F2 cell-surface antigen heavy chain GN=SLC3A2	4F2_HUMAN	67.9964	1	5	7	11	0.00016	0.105	IGDLQAFQGHGAGNLAGLK	0.997	36	25	36	0	2	0	1866.98	227	245
4F2 cell-surface antigen heavy chain GN=SLC3A2	4F2_HUMAN	67.9964	1	5	7	11	0.00016	0.105	ADLLLSTQPGREEGSPLELER	0.997	41.2	25	41.2	0	1	0	2310.19	593	613
Aldehyde dehydrogenase family 16 member A1 GN=ALDH16A1	A16A1_HUMAN	85.1268	1	6	6	10	0.000146	0.091	LAEVIQKHQR	0.997	22.6	25	19.4	0	2	0	1221.71	108	117
Aldehyde dehydrogenase family 16 member A1 GN=ALDH16A1	A16A1_HUMAN	85.1268	1	6	6	10	0.000146	0.091	VAFCGAPEEGR	0.997	34.4	25	34.4	2	0	0	1192.54	246	256
Aldehyde dehydrogenase family 16 member A1 GN=ALDH16A1	A16A1_HUMAN	85.1268	1	6	6	10	0.000146	0.091	GLDGAVDMGAR	0.997	50.1	25	40	2	0	0	1061.5	335	345
Aldehyde dehydrogenase family 16 member A1 GN=ALDH16A1	A16A1_HUMAN	85.1268	1	6	6	10	0.000146	0.091	EALLVANGTPR	0.997	37.8	25	35.9	2	0	0	1140.64	414	424
Aldehyde dehydrogenase family 16 member A1 GN=ALDH16A1	A16A1_HUMAN	85.1268	1	6	6	10	0.000146	0.091	AAEAEVELSAR	0.971	21.6	25	9.01	1	0	0	1145.58	619	629
Aldehyde dehydrogenase family 16 member A1 GN=ALDH16A1	A16A1_HUMAN	85.1268	1	6	6	10	0.000146	0.091	VQAQGHTLQVAGLRGPVLR	0.996	22	25	22	0	1	0	2000.15	638	656
Aladin GN=AAAS	AAAS_HUMAN	59.5741	1	3	3	6	8.75e-05	0.0659	VYNASSTIVPSLK	0.997	48.2	25	47.5	2	0	0	1378.76	177	189
Aladin GN=AAAS	AAAS_HUMAN	59.5741	1	3	3	6	8.75e-05	0.0659	ILATTPSAVFR	0.997	62.5	25	58.3	2	0	0	1175.68	302	312
Aladin GN=AAAS	AAAS_HUMAN	59.5741	1	3	3	6	8.75e-05	0.0659	VQDGKPVILLFR	0.963	23.9	25	23.9	2	0	0	1384.83	421	432
5'-AMP-activated protein kinase catalytic subunit alpha-1 GN=PRKAA1	AAPK1_HUMAN	64.0108	0.999	2	2	3	4.37e-05	0.059	DLKPENVLLDAHMNAK	0.997	24.3	25	24.3	0	1	0	1807.94	150	165
5'-AMP-activated protein kinase catalytic subunit alpha-1 GN=PRKAA1	AAPK1_HUMAN	64.0108	0.999	2	2	3	4.37e-05	0.059	TSCGSPNYAAPEVISGR	0.997	33.7	25	33.7	2	0	0	1765.82	183	199
Aspartate aminotransferase, mitochondrial GN=GOT2	AATM_HUMAN	47.5186	1	4	4	7	0.000102	0.112	ASAELALGENSEVLK	0.997	52.7	25	46.3	2	0	0	1530.8	108	122
Aspartate aminotransferase, mitochondrial GN=GOT2	AATM_HUMAN	47.5186	1	4	4	7	0.000102	0.112	FVTVQTISGTGALR	0.997	100	25	99.4	2	0	0	1449.81	126	139
Aspartate aminotransferase, mitochondrial GN=GOT2	AATM_HUMAN	47.5186	1	4	4	7	0.000102	0.112	DAGMQLQGYR	0.994	36.2	25	36.2	1	0	0	1138.53	171	180
Aspartate aminotransferase, mitochondrial GN=GOT2	AATM_HUMAN	47.5186	1	4	4	7	0.000102	0.112	TQLVSNLKK	0.986	24.5	25	21.3	2	0	0	1030.63	356	364
ATP-binding cassette sub-family B member 10, mitochondrial GN=ABCB10	ABCBA_HUMAN	79.1509	0.998	2	2	3	4.37e-05	0.0257	LSSDTALLGR	0.982	32.8	25	30.7	1	0	0	1032.57	275	284
ATP-binding cassette sub-family B member 10, mitochondrial GN=ABCB10	ABCBA_HUMAN	79.1509	0.998	2	2	3	4.37e-05	0.0257	STVLSLLLR	0.997	47	25	23.1	2	0	0	1001.64	534	542
ATP-binding cassette sub-family D member 3 GN=ABCD3	ABCD3_HUMAN	75.4792	1	4	4	8	0.000117	0.0759	AVVDKVFFSR	0.997	52.4	25	48.7	2	0	0	1167.65	57	66
ATP-binding cassette sub-family D member 3 GN=ABCD3	ABCD3_HUMAN	75.4792	1	4	4	8	0.000117	0.0759	STHSELLEDYYQSGR	0.997	57.5	25	57.5	0	2	0	1784.81	348	362
ATP-binding cassette sub-family D member 3 GN=ABCD3	ABCD3_HUMAN	75.4792	1	4	4	8	0.000117	0.0759	IVLAGREMTR	0.991	27.2	25	16.1	2	0	0	1145.65	374	383
ATP-binding cassette sub-family D member 3 GN=ABCD3	ABCD3_HUMAN	75.4792	1	4	4	8	0.000117	0.0759	SGANVLICGPNGCGK	0.997	68.7	25	68.7	2	0	0	1503.7	465	479
ATP-binding cassette sub-family F member 2 GN=ABCF2	ABCF2_HUMAN	71.2925	1	12	14	22	0.000321	0.162	YGLIGLNGIGK	0.997	46.8	25	41.9	4	0	0	1104.64	114	124
ATP-binding cassette sub-family F member 2 GN=ABCF2	ABCF2_HUMAN	71.2925	1	12	14	22	0.000321	0.162	SMLLSAIGKR	0.99	26.2	25	21.6	2	0	0	1091.62	125	134
ATP-binding cassette sub-family F member 2 GN=ABCF2	ABCF2_HUMAN	71.2925	1	12	14	22	0.000321	0.162	EVPIPEHIDIYHLTR	0.997	24.9	25	24.9	0	1	0	1831.97	135	149
ATP-binding cassette sub-family F member 2 GN=ABCF2	ABCF2_HUMAN	71.2925	1	12	14	22	0.000321	0.162	ILHGLGFTPAMQR	0.995	21.7	25	17.4	0	1	0	1440.78	211	223
ATP-binding cassette sub-family F member 2 GN=ABCF2	ABCF2_HUMAN	71.2925	1	12	14	22	0.000321	0.162	YYTGNYDQYVK	0.997	36.5	25	23.9	2	0	0	1413.63	305	315
ATP-binding cassette sub-family F member 2 GN=ABCF2	ABCF2_HUMAN	71.2925	1	12	14	22	0.000321	0.162	LLTGELLPTDGMIR	0.997	72	25	66.1	1	0	0	1528.84	442	455
ATP-binding cassette sub-family F member 2 GN=ABCF2	ABCF2_HUMAN	71.2925	1	12	14	22	0.000321	0.162	LLTGELLPTDGMIRK	0.988	19.7	25	19.7	0	2	0	1672.93	442	456
ATP-binding cassette sub-family F member 2 GN=ABCF2	ABCF2_HUMAN	71.2925	1	12	14	22	0.000321	0.162	YGLTGKQQVSPIR	0.997	28.2	25	28.2	1	1	0	1446.81	503	515
ATP-binding cassette sub-family F member 2 GN=ABCF2	ABCF2_HUMAN	71.2925	1	12	14	22	0.000321	0.162	QQVSPIR	0.994	30.4	25	19.1	1	0	0	827.473	509	515
ATP-binding cassette sub-family F member 2 GN=ABCF2	ABCF2_HUMAN	71.2925	1	12	14	22	0.000321	0.162	SKLVDEEPQLTK	0.997	57.8	25	50.1	2	0	0	1386.75	607	618
ATP-binding cassette sub-family F member 2 GN=ABCF2	ABCF2_HUMAN	71.2925	1	12	14	22	0.000321	0.162	LVDEEPQLTK	0.997	37.7	25	21.3	2	0	0	1171.62	609	618
ATP-binding cassette sub-family F member 2 GN=ABCF2	ABCF2_HUMAN	71.2925	1	12	14	22	0.000321	0.162	LVDEEPQLTKR	0.997	38.9	25	31.3	2	0	0	1327.72	609	619
Activator of basal transcription 1 GN=ABT1	ABT1_HUMAN	31.0794	0.999	2	4	6	8.75e-05	0.0882	NLLSAYGEVGR	0.997	54.5	25	39.3	2	0	0	1178.62	64	74
Activator of basal transcription 1 GN=ABT1	ABT1_HUMAN	31.0794	0.999	2	4	6	8.75e-05	0.0882	VAASLHNTPMGAR	0.997	46.9	25	43.1	3	1	0	1324.68	121	133
Acetyl-CoA carboxylase 1 GN=ACACA	ACACA_HUMAN	265.556	1	3	3	3	4.37e-05	0.0183	AIGIGAYLVR	0.982	28.7	25	16.7	1	0	0	1032.62	1824	1833
Acetyl-CoA carboxylase 1 GN=ACACA	ACACA_HUMAN	265.556	1	3	3	3	4.37e-05	0.0183	TVELSIPADPANLDSEAK	0.976	22.4	25	19.7	1	0	0	1869.94	1992	2009
Acetyl-CoA carboxylase 1 GN=ACACA	ACACA_HUMAN	265.556	1	3	3	3	4.37e-05	0.0183	GSVLEPEGTVEIKFR	0.955	20.1	25	18.6	0	1	0	1660.89	2115	2129
Acyl-CoA dehydrogenase family member 9, mitochondrial GN=ACAD9	ACAD9_HUMAN	68.7628	1	4	4	6	8.75e-05	0.0902	AFAKELFLGK	0.997	39.6	25	39.6	2	0	0	1123.65	38	47
Acyl-CoA dehydrogenase family member 9, mitochondrial GN=ACAD9	ACAD9_HUMAN	68.7628	1	4	4	6	8.75e-05	0.0902	LASGEHIAAFCLTEPASGSDAASIR	0.997	45.7	25	45.1	0	2	0	2531.22	169	193
Acyl-CoA dehydrogenase family member 9, mitochondrial GN=ACAD9	ACAD9_HUMAN	68.7628	1	4	4	6	8.75e-05	0.0902	ILLIFEGTNEILR	0.997	32.3	25	32.3	1	0	0	1530.89	421	433
Acyl-CoA dehydrogenase family member 9, mitochondrial GN=ACAD9	ACAD9_HUMAN	68.7628	1	4	4	6	8.75e-05	0.0902	TVETLLLR	0.997	35.2	25	19.4	1	0	0	944.578	511	518
Medium-chain specific acyl-CoA dehydrogenase, mitochondrial GN=ACADM	ACADM_HUMAN	46.5895	1	4	4	7	0.000102	0.131	ANWYFLLAR	0.997	49.8	25	42.4	2	0	0	1153.62	198	206
Medium-chain specific acyl-CoA dehydrogenase, mitochondrial GN=ACADM	ACADM_HUMAN	46.5895	1	4	4	7	0.000102	0.131	AFTGFIVEADTPGIQIGR	0.991	34.2	25	30.4	1	0	0	1891.99	218	235
Medium-chain specific acyl-CoA dehydrogenase, mitochondrial GN=ACADM	ACADM_HUMAN	46.5895	1	4	4	7	0.000102	0.131	TRPVVAAGAVGLAQR	0.997	30.8	25	29.2	0	2	0	1465.86	280	294
Medium-chain specific acyl-CoA dehydrogenase, mitochondrial GN=ACADM	ACADM_HUMAN	46.5895	1	4	4	7	0.000102	0.131	IYQIYEGTSQIQR	0.997	61.6	25	58.1	2	0	0	1598.82	396	408
Arf-GAP with coiled-coil, ANK repeat and PH domain-containing protein 2 GN=ACAP2	ACAP2_HUMAN	88.0301	0.998	2	2	2	2.92e-05	0.0219	FGPGDQVR	0.996	28.8	25	17.6	1	0	0	875.437	544	551
Arf-GAP with coiled-coil, ANK repeat and PH domain-containing protein 2 GN=ACAP2	ACAP2_HUMAN	88.0301	0.998	2	2	2	2.92e-05	0.0219	ASYEKNLPK	0.97	23	25	16.7	1	0	0	1049.56	613	621
Short/branched chain specific acyl-CoA dehydrogenase, mitochondrial GN=ACADSB	ACDSB_HUMAN	47.4871	1	4	4	7	0.000102	0.12	ATYLPQLTTEK	0.972	22.2	25	22.2	1	0	0	1264.68	160	170
Short/branched chain specific acyl-CoA dehydrogenase, mitochondrial GN=ACADSB	ACDSB_HUMAN	47.4871	1	4	4	7	0.000102	0.12	YAIGSLNEGR	0.997	52.4	25	41.5	2	0	0	1079.55	285	294
Short/branched chain specific acyl-CoA dehydrogenase, mitochondrial GN=ACADSB	ACDSB_HUMAN	47.4871	1	4	4	7	0.000102	0.12	YYASEIAGQTTSK	0.997	82.6	25	78.5	2	0	0	1418.68	372	384
Short/branched chain specific acyl-CoA dehydrogenase, mitochondrial GN=ACADSB	ACDSB_HUMAN	47.4871	1	4	4	7	0.000102	0.12	IGTIYEGASNIQLNTIAK	0.997	85.6	25	85.6	2	0	0	1906.03	409	426
Apoptotic chromatin condensation inducer in the nucleus GN=ACIN1	ACINU_HUMAN	151.862	1	10	10	32	0.000466	0.0805	VTDLKAALEQR	0.996	50.8	25	39.1	2	0	0	1243.7	77	87
Apoptotic chromatin condensation inducer in the nucleus GN=ACIN1	ACINU_HUMAN	151.862	1	10	10	32	0.000466	0.0805	GALMLENLQK	0.997	45	25	37.4	2	0	0	1116.61	104	113
Apoptotic chromatin condensation inducer in the nucleus GN=ACIN1	ACINU_HUMAN	151.862	1	10	10	32	0.000466	0.0805	SQEQEVLER	0.997	50.4	25	44.8	2	0	0	1117.55	328	336
Apoptotic chromatin condensation inducer in the nucleus GN=ACIN1	ACINU_HUMAN	151.862	1	10	10	32	0.000466	0.0805	GVPAGNSDTEGGQPGR	0.997	69.8	25	63.4	7	0	0	1498.69	832	847
Apoptotic chromatin condensation inducer in the nucleus GN=ACIN1	ACINU_HUMAN	151.862	1	10	10	32	0.000466	0.0805	GVPAGNSDTEGGQPGRK	0.997	37.7	25	34.8	2	0	0	1626.78	832	848
Apoptotic chromatin condensation inducer in the nucleus GN=ACIN1	ACINU_HUMAN	151.862	1	10	10	32	0.000466	0.0805	WGASTATTQK	0.997	53.5	25	44.1	3	0	0	1050.52	851	860
Apoptotic chromatin condensation inducer in the nucleus GN=ACIN1	ACINU_HUMAN	151.862	1	10	10	32	0.000466	0.0805	KPSISITTESLK	0.997	31.9	25	30.9	2	0	0	1303.75	861	872
Apoptotic chromatin condensation inducer in the nucleus GN=ACIN1	ACINU_HUMAN	151.862	1	10	10	32	0.000466	0.0805	VTLGDTLTRR	0.988	24.7	25	16.2	3	0	0	1131.65	971	980
Apoptotic chromatin condensation inducer in the nucleus GN=ACIN1	ACINU_HUMAN	151.862	1	10	10	32	0.000466	0.0805	SGVSITIDDPVR	0.997	67.2	25	58.3	8	0	0	1258.66	987	998
Apoptotic chromatin condensation inducer in the nucleus GN=ACIN1	ACINU_HUMAN	151.862	1	10	10	32	0.000466	0.0805	SHCFVTYSTVEEAVATR	0.991	18.2	25	14.4	0	1	0	1956.91	1050	1066
ATP-citrate synthase GN=ACLY	ACLY_HUMAN	120.843	1	29	44	97	0.00141	0.263	AISEQTGKELLYK	0.997	53.5	25	53.5	2	1	0	1479.81	5	17
ATP-citrate synthase GN=ACLY	ACLY_HUMAN	120.843	1	29	44	97	0.00141	0.263	FICTTSAIQNR	0.997	62.5	25	60.2	2	0	0	1310.65	18	28
ATP-citrate synthase GN=ACLY	ACLY_HUMAN	120.843	1	29	44	97	0.00141	0.263	GKLGLVGVNLTLDGVK	0.997	62.6	25	62.6	2	2	0	1582.95	67	82
ATP-citrate synthase GN=ACLY	ACLY_HUMAN	120.843	1	29	44	97	0.00141	0.263	LGLVGVNLTLDGVK	0.997	59.4	25	59.4	2	0	0	1397.84	69	82
ATP-citrate synthase GN=ACLY	ACLY_HUMAN	120.843	1	29	44	97	0.00141	0.263	LGQEATVGK	0.997	63.3	25	46.8	4	0	0	902.494	89	97
ATP-citrate synthase GN=ACLY	ACLY_HUMAN	120.843	1	29	44	97	0.00141	0.263	LGQEATVGKATGFLK	0.997	36.5	25	31.7	1	2	0	1519.85	89	103
ATP-citrate synthase GN=ACLY	ACLY_HUMAN	120.843	1	29	44	97	0.00141	0.263	EAYPEEAYIADLDAK	0.997	46.8	25	46.8	2	0	0	1697.79	245	259
ATP-citrate synthase GN=ACLY	ACLY_HUMAN	120.843	1	29	44	97	0.00141	0.263	TILSLMTR	0.997	35.4	25	22.6	6	0	0	934.539	322	329
ATP-citrate synthase GN=ACLY	ACLY_HUMAN	120.843	1	29	44	97	0.00141	0.263	RGGPNYQEGLR	0.996	30.4	25	20.6	2	0	0	1246.63	379	389
ATP-citrate synthase GN=ACLY	ACLY_HUMAN	120.843	1	29	44	97	0.00141	0.263	GGPNYQEGLR	0.988	38.4	25	29.2	1	0	0	1090.53	380	389
ATP-citrate synthase GN=ACLY	ACLY_HUMAN	120.843	1	29	44	97	0.00141	0.263	TASFSESRADEVAPAK	0.997	52.1	25	52.1	2	2	0	1665.81	453	468
ATP-citrate synthase GN=ACLY	ACLY_HUMAN	120.843	1	29	44	97	0.00141	0.263	AKPAMPQDSVPSPR	0.997	55.8	25	55.8	3	1	0	1496.75	470	483
ATP-citrate synthase GN=ACLY	ACLY_HUMAN	120.843	1	29	44	97	0.00141	0.263	SLQGKSTTLFSR	0.996	26.1	25	25.8	0	1	0	1324.72	484	495
ATP-citrate synthase GN=ACLY	ACLY_HUMAN	120.843	1	29	44	97	0.00141	0.263	SAYDSTMETMNYAQIR	0.997	58.3	25	58.3	6	0	0	1880.82	577	592
ATP-citrate synthase GN=ACLY	ACLY_HUMAN	120.843	1	29	44	97	0.00141	0.263	TIAIIAEGIPEALTR	0.997	79.1	25	74.6	8	0	0	1567.91	593	607
ATP-citrate synthase GN=ACLY	ACLY_HUMAN	120.843	1	29	44	97	0.00141	0.263	TIAIIAEGIPEALTRK	0.997	29.2	25	29.2	0	2	0	1696	593	608
ATP-citrate synthase GN=ACLY	ACLY_HUMAN	120.843	1	29	44	97	0.00141	0.263	ADQKGVTIIGPATVGGIKPGCFK	0.997	43	25	43	0	2	0	2314.26	613	635
ATP-citrate synthase GN=ACLY	ACLY_HUMAN	120.843	1	29	44	97	0.00141	0.263	GVTIIGPATVGGIKPGCFK	0.997	31.6	25	25.1	2	2	0	1872.04	617	635
ATP-citrate synthase GN=ACLY	ACLY_HUMAN	120.843	1	29	44	97	0.00141	0.263	IGNTGGMLDNILASK	0.997	65.9	25	60.7	3	0	0	1503.78	636	650
ATP-citrate synthase GN=ACLY	ACLY_HUMAN	120.843	1	29	44	97	0.00141	0.263	LYRPGSVAYVSR	0.997	33.5	25	27.1	1	5	0	1367.74	651	662
ATP-citrate synthase GN=ACLY	ACLY_HUMAN	120.843	1	29	44	97	0.00141	0.263	SGGMSNELNNIISR	0.997	82	25	70.1	9	0	0	1491.72	663	676
ATP-citrate synthase GN=ACLY	ACLY_HUMAN	120.843	1	29	44	97	0.00141	0.263	YQDTPGVK	0.962	20.1	25	5.76	2	0	0	907.452	704	711
ATP-citrate synthase GN=ACLY	ACLY_HUMAN	120.843	1	29	44	97	0.00141	0.263	NQALKEAGVFVPR	0.997	77.4	25	72.5	2	2	0	1428.8	776	788
ATP-citrate synthase GN=ACLY	ACLY_HUMAN	120.843	1	29	44	97	0.00141	0.263	EAGVFVPR	0.997	33.3	25	18.6	2	0	0	874.478	781	788
ATP-citrate synthase GN=ACLY	ACLY_HUMAN	120.843	1	29	44	97	0.00141	0.263	AFDSGIIPMEFVNK	0.997	65.7	25	65.6	4	0	0	1583.78	949	962
ATP-citrate synthase GN=ACLY	ACLY_HUMAN	120.843	1	29	44	97	0.00141	0.263	EGKLIMGIGHR	0.995	20.7	25	18.7	0	2	0	1226.67	966	976
ATP-citrate synthase GN=ACLY	ACLY_HUMAN	120.843	1	29	44	97	0.00141	0.263	LIMGIGHR	0.989	25.4	25	20.7	1	0	0	912.509	969	976
ATP-citrate synthase GN=ACLY	ACLY_HUMAN	120.843	1	29	44	97	0.00141	0.263	SINNPDMR	0.989	27.5	25	19.4	2	0	0	946.441	979	986
ATP-citrate synthase GN=ACLY	ACLY_HUMAN	120.843	1	29	44	97	0.00141	0.263	VQILKDYVR	0.976	24.5	25	15.2	2	0	0	1133.67	987	995
Acyl-coenzyme A thioesterase 1 GN=ACOT1	ACOT1_HUMAN	46.2782	0.998	2	2	4	5.83e-05	0.0523	AATLILEPAGR	0.997	45.3	25	38.2	2	0	0	1111.65	2	12
Acyl-coenzyme A thioesterase 1 GN=ACOT1	ACOT1_HUMAN	46.2782	0.998	2	2	4	5.83e-05	0.0523	GLAPEQPVTLR	0.997	31.1	25	23.5	2	0	0	1180.67	25	35
Acyl-coenzyme A thioesterase 8 GN=ACOT8	ACOT8_HUMAN	35.9134	0.998	2	2	3	4.37e-05	0.0815	LFGGQIVGQALVAAAK	0.997	52.6	25	52.6	2	0	0	1542.9	54	69
Acyl-coenzyme A thioesterase 8 GN=ACOT8	ACOT8_HUMAN	35.9134	0.998	2	2	3	4.37e-05	0.0815	VKPQVSESKL	0.996	30.1	25	25.4	1	0	0	1114.65	310	319
Acyl-coenzyme A thioesterase 9, mitochondrial GN=ACOT9	ACOT9_HUMAN	49.9025	1	3	3	6	8.75e-05	0.0661	YLTVQNTVR	0.997	32.7	25	32	2	0	0	1093.6	104	112
Acyl-coenzyme A thioesterase 9, mitochondrial GN=ACOT9	ACOT9_HUMAN	49.9025	1	3	3	6	8.75e-05	0.0661	IAFSSTSLLK	0.997	44.9	25	44.9	2	0	0	1066.61	241	250
Acyl-coenzyme A thioesterase 9, mitochondrial GN=ACOT9	ACOT9_HUMAN	49.9025	1	3	3	6	8.75e-05	0.0661	SLEICHPQER	0.997	44	25	42.5	2	0	0	1268.61	295	304
Long-chain-fatty-acid--CoA ligase 3 GN=ACSL3	ACSL3_HUMAN	80.4231	1	3	3	6	8.75e-05	0.0556	LKDIVSLVPR	0.997	38.9	25	38.9	2	0	0	1139.71	221	230
Long-chain-fatty-acid--CoA ligase 3 GN=ACSL3	ACSL3_HUMAN	80.4231	1	3	3	6	8.75e-05	0.0556	IGYSSPQTLADQSSK	0.997	64.3	25	64.3	2	0	0	1581.78	349	363
Long-chain-fatty-acid--CoA ligase 3 GN=ACSL3	ACSL3_HUMAN	80.4231	1	3	3	6	8.75e-05	0.0556	LLLCGGAPLSATTQR	0.997	64.6	25	46.8	2	0	0	1557.84	447	461
Actin, cytoplasmic 2 GN=ACTG1	ACTG_HUMAN	41.7939	1	25	47	183	0.00267	0.56	AGFAGDDAPR	0.997	75.7	25	59.2	18	0	0	976.448	19	28
Actin, cytoplasmic 2 GN=ACTG1	ACTG_HUMAN	41.7939	1	25	47	183	0.00267	0.56	AVFPSIVGRPR	0.997	56.7	25	53.6	6	0	0	1198.71	29	39
Actin, cytoplasmic 2 GN=ACTG1	ACTG_HUMAN	41.7939	1	25	47	183	0.00267	0.56	HQGVMVGMGQK	0.997	55.7	25	24.4	6	0	0	1187.57	40	50
Actin, cytoplasmic 2 GN=ACTG1	ACTG_HUMAN	41.7939	1	25	47	183	0.00267	0.56	HQGVMVGMGQKDSYVGDEAQSK	0.997	49.2	25	49.2	0	9	0	2351.08	40	61
Actin, cytoplasmic 2 GN=ACTG1	ACTG_HUMAN	41.7939	1	25	47	183	0.00267	0.56	DSYVGDEAQSK	0.997	56.4	25	56.4	4	0	0	1198.52	51	61
Actin, cytoplasmic 2 GN=ACTG1	ACTG_HUMAN	41.7939	1	25	47	183	0.00267	0.56	DSYVGDEAQSKR	0.997	72.7	25	70.3	10	2	0	1354.62	51	62
Actin, cytoplasmic 2 GN=ACTG1	ACTG_HUMAN	41.7939	1	25	47	183	0.00267	0.56	RGILTLK	0.994	29	25	16.1	1	0	0	800.535	62	68
Actin, cytoplasmic 2 GN=ACTG1	ACTG_HUMAN	41.7939	1	25	47	183	0.00267	0.56	VAPEEHPVLLTEAPLNPK	0.997	45.8	25	12.6	5	7	0	1954.06	96	113
Actin, cytoplasmic 2 GN=ACTG1	ACTG_HUMAN	41.7939	1	25	47	183	0.00267	0.56	VAPEEHPVLLTEAPLNPKANR	0.997	31.1	25	29.1	0	1	0	2295.25	96	116
Actin, cytoplasmic 2 GN=ACTG1	ACTG_HUMAN	41.7939	1	25	47	183	0.00267	0.56	LDLAGRDLTDYLMK	0.997	52.7	25	48.9	5	4	0	1623.84	178	191
Actin, cytoplasmic 2 GN=ACTG1	ACTG_HUMAN	41.7939	1	25	47	183	0.00267	0.56	DLTDYLMK	0.993	26.2	25	19.1	3	0	0	998.486	184	191
Actin, cytoplasmic 2 GN=ACTG1	ACTG_HUMAN	41.7939	1	25	47	183	0.00267	0.56	ILTERGYSFTTTAER	0.997	46.9	25	45.7	2	2	0	1744.89	192	206
Actin, cytoplasmic 2 GN=ACTG1	ACTG_HUMAN	41.7939	1	25	47	183	0.00267	0.56	GYSFTTTAER	0.997	62	25	54.8	8	0	0	1132.53	197	206
Actin, cytoplasmic 2 GN=ACTG1	ACTG_HUMAN	41.7939	1	25	47	183	0.00267	0.56	GYSFTTTAEREIVR	0.997	29.9	25	25.6	2	2	0	1629.82	197	210
Actin, cytoplasmic 2 GN=ACTG1	ACTG_HUMAN	41.7939	1	25	47	183	0.00267	0.56	LCYVALDFEQEMATAASSSSLEK	0.997	76.6	25	76.6	2	2	0	2566.17	216	238
Actin, cytoplasmic 2 GN=ACTG1	ACTG_HUMAN	41.7939	1	25	47	183	0.00267	0.56	SYELPDGQVITIGNER	0.997	79	25	69.8	24	2	0	1790.89	239	254
Actin, cytoplasmic 2 GN=ACTG1	ACTG_HUMAN	41.7939	1	25	47	183	0.00267	0.56	SYELPDGQVITIGNERFR	0.984	18	25	14.3	0	1	0	2094.06	239	256
Actin, cytoplasmic 2 GN=ACTG1	ACTG_HUMAN	41.7939	1	25	47	183	0.00267	0.56	CDVDIRK	0.993	26.7	25	9.07	2	0	0	905.451	285	291
Actin, cytoplasmic 2 GN=ACTG1	ACTG_HUMAN	41.7939	1	25	47	183	0.00267	0.56	DLYANTVLSGGTTMYPGIADR	0.997	100	25	100	4	4	0	2231.07	292	312
Actin, cytoplasmic 2 GN=ACTG1	ACTG_HUMAN	41.7939	1	25	47	183	0.00267	0.56	MQKEITALAPSTMK	0.997	76.3	25	67.1	11	7	0	1564.81	313	326
Actin, cytoplasmic 2 GN=ACTG1	ACTG_HUMAN	41.7939	1	25	47	183	0.00267	0.56	EITALAPSTMK	0.997	48.5	25	28.2	14	0	0	1161.62	316	326
Actin, cytoplasmic 2 GN=ACTG1	ACTG_HUMAN	41.7939	1	25	47	183	0.00267	0.56	EITALAPSTMKIK	0.997	36.9	25	36.7	4	1	0	1402.8	316	328
Actin, cytoplasmic 2 GN=ACTG1	ACTG_HUMAN	41.7939	1	25	47	183	0.00267	0.56	IKIIAPPER	0.997	36.9	25	36.9	2	0	0	1036.65	327	335
Actin, cytoplasmic 2 GN=ACTG1	ACTG_HUMAN	41.7939	1	25	47	183	0.00267	0.56	QEYDESGPSIVHR	0.997	41.8	25	41.8	2	2	0	1516.7	360	372
Actin, cytoplasmic 2 GN=ACTG1	ACTG_HUMAN	41.7939	1	25	47	183	0.00267	0.56	QEYDESGPSIVHRK	0.997	26.9	25	25.8	0	2	0	1644.8	360	373
Alpha-centractin GN=ACTR1A	ACTZ_HUMAN	42.6152	1	7	9	17	0.000248	0.25	AGFAGDQIPK	0.997	61.1	25	45.5	3	0	0	1003.52	23	32
Alpha-centractin GN=ACTR1A	ACTZ_HUMAN	42.6152	1	7	9	17	0.000248	0.25	YCFPNYVGRPK	0.997	41.6	25	41.6	2	1	0	1400.68	33	43
Alpha-centractin GN=ACTR1A	ACTZ_HUMAN	42.6152	1	7	9	17	0.000248	0.25	VMAGALEGDIFIGPK	0.997	75.1	25	0	4	0	0	1517.8	47	61
Alpha-centractin GN=ACTR1A	ACTZ_HUMAN	42.6152	1	7	9	17	0.000248	0.25	IDIAGRDVSR	0.997	34.9	25	26.5	2	0	0	1101.6	183	192
Alpha-centractin GN=ACTR1A	ACTZ_HUMAN	42.6152	1	7	9	17	0.000248	0.25	EGYDFHSSSEFEIVK	0.996	21.1	25	20	0	1	0	1773.8	201	215
Alpha-centractin GN=ACTR1A	ACTZ_HUMAN	42.6152	1	7	9	17	0.000248	0.25	AQYYLPDGSTIEIGPSR	0.997	48	25	40.5	2	0	0	1866.92	239	255
Alpha-centractin GN=ACTR1A	ACTZ_HUMAN	42.6152	1	7	9	17	0.000248	0.25	TLFSNIVLSGGSTLFK	0.997	77.8	25	77.8	2	0	0	1683.93	293	308
Proteasomal ubiquitin receptor ADRM1 GN=ADRM1	ADRM1_HUMAN	42.1543	1	3	3	8	0.000117	0.086	GASNKYLVEFR	0.997	41.2	25	24.7	2	0	0	1283.67	17	27
Proteasomal ubiquitin receptor ADRM1 GN=ADRM1	ADRM1_HUMAN	42.1543	1	3	3	8	0.000117	0.086	VPQCPSGR	0.997	40.1	25	38.1	1	0	0	900.436	85	92
Proteasomal ubiquitin receptor ADRM1 GN=ADRM1	ADRM1_HUMAN	42.1543	1	3	3	8	0.000117	0.086	SQSAAVTPSSTTSSTR	0.997	53.4	25	53.1	5	0	0	1567.76	211	226
NADPH:adrenodoxin oxidoreductase, mitochondrial GN=FDXR	ADRO_HUMAN	53.8365	0.998	2	2	2	2.92e-05	0.055	TATEKPGPAEAAR	0.96	15.5	25	15.5	0	1	0	1298.67	283	295
NADPH:adrenodoxin oxidoreductase, mitochondrial GN=FDXR	ADRO_HUMAN	53.8365	0.998	2	2	2	2.92e-05	0.055	LAVTRLEGVDEATR	0.99	18.8	25	18.8	0	1	0	1529.83	328	341
ADP/ATP translocase 1 GN=SLC25A4	ADT1_HUMAN	33.0654	1	2	2	3	4.37e-05	0.329	TAVAPIER	0.995	32.4	25	24.6	3	0	0	856.489	24	31
ADP/ATP translocase 1 GN=SLC25A4	ADT1_HUMAN	33.0654	1	2	2	3	4.37e-05	0.329	TAVAPIERVK	0.997	40.1	25	36.3	2	0	0	1083.65	24	33
ADP/ATP translocase 1 GN=SLC25A4	ADT1_HUMAN	33.0654	1	2	2	3	4.37e-05	0.329	VKLLLQVQHASK	0.997	66.2	25	46.8	2	9	0	1363.84	32	43
ADP/ATP translocase 1 GN=SLC25A4	ADT1_HUMAN	33.0654	1	2	2	3	4.37e-05	0.329	LLLQVQHASK	0.997	43.1	25	37.7	9	0	0	1136.68	34	43
ADP/ATP translocase 1 GN=SLC25A4	ADT1_HUMAN	33.0654	1	2	2	3	4.37e-05	0.329	GIIDCVVR	0.997	33.5	25	14.8	2	0	0	931.503	53	60
ADP/ATP translocase 1 GN=SLC25A4	ADT1_HUMAN	33.0654	1	2	2	3	4.37e-05	0.329	GNLANVIR	0.997	40.6	25	29.7	2	0	0	856.5	73	80
ADP/ATP translocase 1 GN=SLC25A4	ADT1_HUMAN	33.0654	1	2	2	3	4.37e-05	0.329	YFPTQALNFAFK	0.997	47.2	25	39.1	2	0	0	1446.74	81	92
ADP/ATP translocase 1 GN=SLC25A4	ADT1_HUMAN	33.0654	1	2	2	3	4.37e-05	0.329	YFPTQALNFAFKDK	0.997	43.7	25	39.1	2	0	0	1689.86	81	94
ADP/ATP translocase 1 GN=SLC25A4	ADT1_HUMAN	33.0654	1	2	2	3	4.37e-05	0.329	TRLAADVGK	0.997	31.3	25	9.64	4	0	0	930.537	139	147
ADP/ATP translocase 1 GN=SLC25A4	ADT1_HUMAN	33.0654	1	2	2	3	4.37e-05	0.329	LAADVGKGAAQR	0.997	69.6	25	63	2	0	0	1156.64	141	152
ADP/ATP translocase 1 GN=SLC25A4	ADT1_HUMAN	33.0654	1	2	2	3	4.37e-05	0.329	EFHGLGDCIIK	0.97	24.7	25	22.2	1	0	0	1288.64	153	163
ADP/ATP translocase 1 GN=SLC25A4	ADT1_HUMAN	33.0654	1	2	2	3	4.37e-05	0.329	AAYFGVYDTAK	0.997	56.1	25	53.5	2	0	0	1205.58	189	199
ADP/ATP translocase 1 GN=SLC25A4	ADT1_HUMAN	33.0654	1	2	2	3	4.37e-05	0.329	AFFKGAWSNVLR	0.96	26.2	25	26.2	2	0	0	1395.75	269	280
ADP/ATP translocase 1 GN=SLC25A4	ADT1_HUMAN	33.0654	1	2	2	3	4.37e-05	0.329	GAWSNVLR	0.997	37.4	25	16.7	3	0	0	902.484	273	280
ADP/ATP translocase 2 GN=SLC25A5	ADT2_HUMAN	32.8535	1	22	24	64	0.000933	0.473	DFLAGGVAAAISK	0.997	98.8	25	90.5	2	0	0	1219.67	11	23
ADP/ATP translocase 2 GN=SLC25A5	ADT2_HUMAN	32.8535	1	22	24	64	0.000933	0.473	TAVAPIER	0.995	32.4	25	24.6	3	0	0	856.489	24	31
ADP/ATP translocase 2 GN=SLC25A5	ADT2_HUMAN	32.8535	1	22	24	64	0.000933	0.473	TAVAPIERVK	0.997	40.1	25	36.3	2	0	0	1083.65	24	33
ADP/ATP translocase 2 GN=SLC25A5	ADT2_HUMAN	32.8535	1	22	24	64	0.000933	0.473	VKLLLQVQHASK	0.997	66.2	25	46.8	2	9	0	1363.84	32	43
ADP/ATP translocase 2 GN=SLC25A5	ADT2_HUMAN	32.8535	1	22	24	64	0.000933	0.473	LLLQVQHASK	0.997	43.1	25	37.7	9	0	0	1136.68	34	43
ADP/ATP translocase 2 GN=SLC25A5	ADT2_HUMAN	32.8535	1	22	24	64	0.000933	0.473	GIIDCVVR	0.997	33.5	25	14.8	2	0	0	931.503	53	60
ADP/ATP translocase 2 GN=SLC25A5	ADT2_HUMAN	32.8535	1	22	24	64	0.000933	0.473	IPKEQGVLSFWR	0.997	37.3	25	37.3	1	2	0	1459.81	61	72
ADP/ATP translocase 2 GN=SLC25A5	ADT2_HUMAN	32.8535	1	22	24	64	0.000933	0.473	EQGVLSFWR	0.996	33.8	25	33.8	2	0	0	1121.57	64	72
ADP/ATP translocase 2 GN=SLC25A5	ADT2_HUMAN	32.8535	1	22	24	64	0.000933	0.473	EQGVLSFWRGNLANVIR	0.988	19.7	25	19.7	0	1	0	1959.06	64	80
ADP/ATP translocase 2 GN=SLC25A5	ADT2_HUMAN	32.8535	1	22	24	64	0.000933	0.473	GNLANVIR	0.997	40.6	25	29.7	2	0	0	856.5	73	80
ADP/ATP translocase 2 GN=SLC25A5	ADT2_HUMAN	32.8535	1	22	24	64	0.000933	0.473	YFPTQALNFAFK	0.997	47.2	25	39.1	2	0	0	1446.74	81	92
ADP/ATP translocase 2 GN=SLC25A5	ADT2_HUMAN	32.8535	1	22	24	64	0.000933	0.473	YFPTQALNFAFKDK	0.997	43.7	25	39.1	2	0	0	1689.86	81	94
ADP/ATP translocase 2 GN=SLC25A5	ADT2_HUMAN	32.8535	1	22	24	64	0.000933	0.473	QIFLGGVDKR	0.997	33.8	25	13.3	2	0	0	1132.65	97	106
ADP/ATP translocase 2 GN=SLC25A5	ADT2_HUMAN	32.8535	1	22	24	64	0.000933	0.473	TRLAADVGK	0.997	31.3	25	9.64	4	0	0	930.537	139	147
ADP/ATP translocase 2 GN=SLC25A5	ADT2_HUMAN	32.8535	1	22	24	64	0.000933	0.473	LAADVGKAGAER	0.997	74.8	25	69.8	2	0	0	1157.63	141	152
ADP/ATP translocase 2 GN=SLC25A5	ADT2_HUMAN	32.8535	1	22	24	64	0.000933	0.473	EFRGLGDCLVK	0.997	32.8	25	23.1	1	0	0	1293.66	153	163
ADP/ATP translocase 2 GN=SLC25A5	ADT2_HUMAN	32.8535	1	22	24	64	0.000933	0.473	GLGDCLVK	0.997	44.8	25	28.7	3	0	0	861.45	156	163
ADP/ATP translocase 2 GN=SLC25A5	ADT2_HUMAN	32.8535	1	22	24	64	0.000933	0.473	GLGDCLVKIYK	0.997	55.6	25	50.4	2	0	0	1265.69	156	166
ADP/ATP translocase 2 GN=SLC25A5	ADT2_HUMAN	32.8535	1	22	24	64	0.000933	0.473	AAYFGIYDTAK	0.997	59.6	25	50.3	2	0	0	1219.6	189	199
ADP/ATP translocase 2 GN=SLC25A5	ADT2_HUMAN	32.8535	1	22	24	64	0.000933	0.473	DEGGKAFFK	0.997	50.4	25	42.8	2	0	0	998.494	264	272
ADP/ATP translocase 2 GN=SLC25A5	ADT2_HUMAN	32.8535	1	22	24	64	0.000933	0.473	AFFKGAWSNVLR	0.96	26.2	25	26.2	2	0	0	1395.75	269	280
ADP/ATP translocase 2 GN=SLC25A5	ADT2_HUMAN	32.8535	1	22	24	64	0.000933	0.473	GAWSNVLR	0.997	37.4	25	16.7	3	0	0	902.484	273	280
ADP/ATP translocase 3 GN=SLC25A6	ADT3_HUMAN	32.8671	1	4	5	12	0.000175	0.413	DFLAGGIAAAISK	0.997	79.2	25	73.3	4	0	0	1233.68	11	23
ADP/ATP translocase 3 GN=SLC25A6	ADT3_HUMAN	32.8671	1	4	5	12	0.000175	0.413	TAVAPIER	0.995	32.4	25	24.6	3	0	0	856.489	24	31
ADP/ATP translocase 3 GN=SLC25A6	ADT3_HUMAN	32.8671	1	4	5	12	0.000175	0.413	TAVAPIERVK	0.997	40.1	25	36.3	2	0	0	1083.65	24	33
ADP/ATP translocase 3 GN=SLC25A6	ADT3_HUMAN	32.8671	1	4	5	12	0.000175	0.413	VKLLLQVQHASK	0.997	66.2	25	46.8	2	9	0	1363.84	32	43
ADP/ATP translocase 3 GN=SLC25A6	ADT3_HUMAN	32.8671	1	4	5	12	0.000175	0.413	LLLQVQHASK	0.997	43.1	25	37.7	9	0	0	1136.68	34	43
ADP/ATP translocase 3 GN=SLC25A6	ADT3_HUMAN	32.8671	1	4	5	12	0.000175	0.413	IPKEQGVLSFWR	0.997	37.3	25	37.3	1	2	0	1459.81	61	72
ADP/ATP translocase 3 GN=SLC25A6	ADT3_HUMAN	32.8671	1	4	5	12	0.000175	0.413	EQGVLSFWR	0.996	33.8	25	33.8	2	0	0	1121.57	64	72
ADP/ATP translocase 3 GN=SLC25A6	ADT3_HUMAN	32.8671	1	4	5	12	0.000175	0.413	EQGVLSFWRGNLANVIR	0.988	19.7	25	19.7	0	1	0	1959.06	64	80
ADP/ATP translocase 3 GN=SLC25A6	ADT3_HUMAN	32.8671	1	4	5	12	0.000175	0.413	GNLANVIR	0.997	40.6	25	29.7	2	0	0	856.5	73	80
ADP/ATP translocase 3 GN=SLC25A6	ADT3_HUMAN	32.8671	1	4	5	12	0.000175	0.413	YFPTQALNFAFK	0.997	47.2	25	39.1	2	0	0	1446.74	81	92
ADP/ATP translocase 3 GN=SLC25A6	ADT3_HUMAN	32.8671	1	4	5	12	0.000175	0.413	YFPTQALNFAFKDK	0.997	43.7	25	39.1	2	0	0	1689.86	81	94
ADP/ATP translocase 3 GN=SLC25A6	ADT3_HUMAN	32.8671	1	4	5	12	0.000175	0.413	TRLAADVGK	0.997	31.3	25	9.64	4	0	0	930.537	139	147
ADP/ATP translocase 3 GN=SLC25A6	ADT3_HUMAN	32.8671	1	4	5	12	0.000175	0.413	LAADVGKSGTER	0.997	75.2	25	64	2	2	0	1203.63	141	152
ADP/ATP translocase 3 GN=SLC25A6	ADT3_HUMAN	32.8671	1	4	5	12	0.000175	0.413	EFRGLGDCLVK	0.997	32.8	25	23.1	1	0	0	1293.66	153	163
ADP/ATP translocase 3 GN=SLC25A6	ADT3_HUMAN	32.8671	1	4	5	12	0.000175	0.413	GLGDCLVK	0.997	44.8	25	28.7	3	0	0	861.45	156	163
ADP/ATP translocase 3 GN=SLC25A6	ADT3_HUMAN	32.8671	1	4	5	12	0.000175	0.413	GLGDCLVKITK	0.997	56.4	25	48.8	2	0	0	1203.68	156	166
ADP/ATP translocase 3 GN=SLC25A6	ADT3_HUMAN	32.8671	1	4	5	12	0.000175	0.413	AAYFGVYDTAK	0.997	56.1	25	53.5	2	0	0	1205.58	189	199
ADP/ATP translocase 3 GN=SLC25A6	ADT3_HUMAN	32.8671	1	4	5	12	0.000175	0.413	DEGGKAFFK	0.997	50.4	25	42.8	2	0	0	998.494	264	272
ADP/ATP translocase 3 GN=SLC25A6	ADT3_HUMAN	32.8671	1	4	5	12	0.000175	0.413	AFFKGAWSNVLR	0.96	26.2	25	26.2	2	0	0	1395.75	269	280
ADP/ATP translocase 3 GN=SLC25A6	ADT3_HUMAN	32.8671	1	4	5	12	0.000175	0.413	GAWSNVLR	0.997	37.4	25	16.7	3	0	0	902.484	273	280
AFG3-like protein 2 GN=AFG3L2	AFG32_HUMAN	88.5868	1	4	4	5	7.29e-05	0.054	TGRGMGGLFSVGETTAK	0.981	17.1	25	17.1	0	1	0	1684.83	281	297
AFG3-like protein 2 GN=AFG3L2	AFG32_HUMAN	88.5868	1	4	4	5	7.29e-05	0.054	GMGGLFSVGETTAK	0.977	23.3	25	23.3	1	0	0	1354.67	284	297
AFG3-like protein 2 GN=AFG3L2	AFG32_HUMAN	88.5868	1	4	4	5	7.29e-05	0.054	GAILTGPPGTGKTLLAK	0.975	25.3	25	25.3	1	0	0	1594.95	343	359
AFG3-like protein 2 GN=AFG3L2	AFG32_HUMAN	88.5868	1	4	4	5	7.29e-05	0.054	VSEEIFFGR	0.997	55.4	25	41.1	2	0	0	1083.55	633	641
Acylglycerol kinase, mitochondrial GN=AGK	AGK_HUMAN	47.138	0.998	2	2	3	4.37e-05	0.0332	KATVFLNPAACK	0.989	27.7	25	27.7	2	0	0	1319.71	62	73
Acylglycerol kinase, mitochondrial GN=AGK	AGK_HUMAN	47.138	0.998	2	2	3	4.37e-05	0.0332	ATVFLNPAACKGK	0.987	25.3	25	19.1	1	0	0	1376.74	63	75
Phosphoacetylglucosamine mutase GN=PGM3	AGM1_HUMAN	59.8524	1	2	3	7	0.000102	0.0369	AFVELTK	0.976	23.9	25	15.9	1	0	0	807.461	190	196
Phosphoacetylglucosamine mutase GN=PGM3	AGM1_HUMAN	59.8524	1	2	3	7	0.000102	0.0369	AFVRPSGTEDVVR	0.997	45.4	25	40.7	2	4	0	1432.75	493	505
Activator of 90 kDa heat shock protein ATPase homolog 1 GN=AHSA1	AHSA1_HUMAN	38.2744	1	4	5	8	0.000117	0.142	WIVEER	0.993	26.2	25	13.3	1	0	0	831.436	11	16
Activator of 90 kDa heat shock protein ATPase homolog 1 GN=AHSA1	AHSA1_HUMAN	38.2744	1	4	5	8	0.000117	0.142	ITLKETFLTSPEELYR	0.993	21.1	25	21.1	0	1	0	1940.04	209	224
Activator of 90 kDa heat shock protein ATPase homolog 1 GN=AHSA1	AHSA1_HUMAN	38.2744	1	4	5	8	0.000117	0.142	GIPAPEEERTR	0.997	40.5	25	40.5	2	0	0	1254.64	306	316
Activator of 90 kDa heat shock protein ATPase homolog 1 GN=AHSA1	AHSA1_HUMAN	38.2744	1	4	5	8	0.000117	0.142	YYFEGIKQTFGYGAR	0.997	50.9	25	50.9	2	2	0	1799.88	322	336
Apoptosis-inducing factor 1, mitochondrial GN=AIFM1	AIFM1_HUMAN	66.9015	1	10	12	20	0.000292	0.199	ISGLGLTPEQK	0.997	55.5	25	45.2	2	0	0	1142.64	99	109
Apoptosis-inducing factor 1, mitochondrial GN=AIFM1	AIFM1_HUMAN	66.9015	1	10	12	20	0.000292	0.199	VLIVSEDPELPYMRPPLSK	0.997	29.3	25	29.3	0	2	0	2183.18	159	177
Apoptosis-inducing factor 1, mitochondrial GN=AIFM1	AIFM1_HUMAN	66.9015	1	10	12	20	0.000292	0.199	LNDGSQITYEK	0.997	46.8	25	46.8	1	0	0	1267.62	245	255
Apoptosis-inducing factor 1, mitochondrial GN=AIFM1	AIFM1_HUMAN	66.9015	1	10	12	20	0.000292	0.199	CLIATGGTPR	0.997	47.7	25	34.6	2	0	0	1045.55	256	265
Apoptosis-inducing factor 1, mitochondrial GN=AIFM1	AIFM1_HUMAN	66.9015	1	10	12	20	0.000292	0.199	SLSAIDRAGAEVK	0.997	44.4	25	32.1	2	1	0	1316.72	266	278
Apoptosis-inducing factor 1, mitochondrial GN=AIFM1	AIFM1_HUMAN	66.9015	1	10	12	20	0.000292	0.199	ALGTEVIQLFPEK	0.997	32.4	25	31.2	2	0	0	1444.8	325	337
Apoptosis-inducing factor 1, mitochondrial GN=AIFM1	AIFM1_HUMAN	66.9015	1	10	12	20	0.000292	0.199	ALGTEVIQLFPEKGNMGK	0.997	33.3	25	33.3	0	4	0	1948.02	325	342
Apoptosis-inducing factor 1, mitochondrial GN=AIFM1	AIFM1_HUMAN	66.9015	1	10	12	20	0.000292	0.199	EGVKVMPNAIVQSVGVSSGK	0.997	45.5	25	45.5	0	2	0	1986.07	359	378
Apoptosis-inducing factor 1, mitochondrial GN=AIFM1	AIFM1_HUMAN	66.9015	1	10	12	20	0.000292	0.199	VMPNAIVQSVGVSSGK	0.997	40.6	25	40.6	1	0	0	1572.84	363	378
Apoptosis-inducing factor 1, mitochondrial GN=AIFM1	AIFM1_HUMAN	66.9015	1	10	12	20	0.000292	0.199	VETDHIVAAVGLEPNVELAK	0.997	29.1	25	29.1	0	1	0	2104.13	389	408
Aminoacyl tRNA synthase complex-interacting multifunctional protein 1 GN=AIMP1	AIMP1_HUMAN	34.353	1	5	8	16	0.000233	0.179	KQQSIAGSADSKPIDVSR	0.997	53.5	25	53.5	0	2	0	1886.99	137	154
Aminoacyl tRNA synthase complex-interacting multifunctional protein 1 GN=AIMP1	AIMP1_HUMAN	34.353	1	5	8	16	0.000233	0.179	QQSIAGSADSKPIDVSR	0.997	47.1	25	47.1	1	2	0	1758.9	138	154
Aminoacyl tRNA synthase complex-interacting multifunctional protein 1 GN=AIMP1	AIMP1_HUMAN	34.353	1	5	8	16	0.000233	0.179	IGCIITAR	0.997	61.5	25	37.9	4	0	0	903.508	159	166
Aminoacyl tRNA synthase complex-interacting multifunctional protein 1 GN=AIMP1	AIMP1_HUMAN	34.353	1	5	8	16	0.000233	0.179	TVVSGLVNHVPLEQMQNR	0.997	52.2	25	48	0	3	0	2037.05	188	205
Aminoacyl tRNA synthase complex-interacting multifunctional protein 1 GN=AIMP1	AIMP1_HUMAN	34.353	1	5	8	16	0.000233	0.179	MVILLCNLKPAK	0.997	53.5	25	53.5	4	0	0	1415.81	206	217
Aminoacyl tRNA synthase complex-interacting multifunctional protein 2 GN=AIMP2	AIMP2_HUMAN	35.3493	1	3	3	5	7.29e-05	0.122	LYELKAAVDGLSK	0.997	57.5	25	57.5	2	0	0	1406.79	66	78
Aminoacyl tRNA synthase complex-interacting multifunctional protein 2 GN=AIMP2	AIMP2_HUMAN	35.3493	1	3	3	5	7.29e-05	0.122	FSIQTMCPIEGEGNIAR	0.997	46.3	25	46.3	1	0	0	1938.9	199	215
Aminoacyl tRNA synthase complex-interacting multifunctional protein 2 GN=AIMP2	AIMP2_HUMAN	35.3493	1	3	3	5	7.29e-05	0.122	FLFSLFGQK	0.995	27.5	25	27.5	2	0	0	1086.6	216	224
Alpha-internexin GN=INA	AINX_HUMAN	55.3923	1	13	14	24	0.00035	0.301	LSGAGGAGGFR	0.997	70	25	55.7	2	0	0	949.485	29	39
Alpha-internexin GN=INA	AINX_HUMAN	55.3923	1	13	14	24	0.00035	0.301	SNVASSAACSSASSLGLGLAYR	0.997	93.1	25	93.1	1	2	0	2129.03	46	67
Alpha-internexin GN=INA	AINX_HUMAN	55.3923	1	13	14	24	0.00035	0.301	RPPASDGLDLSQAAAR	0.997	63.9	25	57.6	0	2	0	1624.84	68	83
Alpha-internexin GN=INA	AINX_HUMAN	55.3923	1	13	14	24	0.00035	0.301	ALEAELAALR	0.997	52.5	25	40	2	0	0	1056.6	121	130
Alpha-internexin GN=INA	AINX_HUMAN	55.3923	1	13	14	24	0.00035	0.301	ALEAELAALRQR	0.981	23.3	25	18.2	2	0	0	1340.76	121	132
Alpha-internexin GN=INA	AINX_HUMAN	55.3923	1	13	14	24	0.00035	0.301	VGELFQR	0.997	41.6	25	15.8	2	0	0	848.462	139	145
Alpha-internexin GN=INA	AINX_HUMAN	55.3923	1	13	14	24	0.00035	0.301	DLRAQLEEASSAR	0.963	22.9	25	17.8	1	0	0	1445.73	149	161
Alpha-internexin GN=INA	AINX_HUMAN	55.3923	1	13	14	24	0.00035	0.301	AQLEEASSAR	0.997	48.6	25	48.6	1	0	0	1061.52	152	161
Alpha-internexin GN=INA	AINX_HUMAN	55.3923	1	13	14	24	0.00035	0.301	DVDGATLAR	0.993	30.8	25	21.4	2	0	0	917.469	202	210
Alpha-internexin GN=INA	AINX_HUMAN	55.3923	1	13	14	24	0.00035	0.301	AQYESLAAK	0.978	23.5	25	0	1	0	0	980.505	270	278
Alpha-internexin GN=INA	AINX_HUMAN	55.3923	1	13	14	24	0.00035	0.301	FANLNEQAAR	0.997	53.1	25	19.2	2	0	0	1133.57	291	300
Alpha-internexin GN=INA	AINX_HUMAN	55.3923	1	13	14	24	0.00035	0.301	TIEIEGLRGANESLER	0.997	32.8	25	31.8	0	2	0	1786.93	323	338
Alpha-internexin GN=INA	AINX_HUMAN	55.3923	1	13	14	24	0.00035	0.301	HLREYQDLLNVK	0.997	29.2	25	22.5	0	5	0	1527.83	375	386
Alpha-internexin GN=INA	AINX_HUMAN	55.3923	1	13	14	24	0.00035	0.301	SNIEETTISSQKI	0.997	66.5	25	64.8	2	0	0	1449.74	487	499
Aldehyde dehydrogenase X, mitochondrial GN=ALDH1B1	AL1B1_HUMAN	57.2066	0.998	2	2	2	2.92e-05	0.0445	LAPALATGNTVVMK	0.997	54.8	25	53.6	1	0	0	1385.78	196	209
Aldehyde dehydrogenase X, mitochondrial GN=ALDH1B1	AL1B1_HUMAN	57.2066	0.998	2	2	2	2.92e-05	0.0445	TVTIKVPQK	0.985	23.4	25	7.57	1	0	0	1013.64	507	515
Mitochondrial 10-formyltetrahydrofolate dehydrogenase GN=ALDH1L2	AL1L2_HUMAN	101.748	0.998	2	2	4	5.83e-05	0.0347	NGLVLFGNDGKALTVR	0.996	23.3	25	23.3	0	1	0	1673.93	296	311
Mitochondrial 10-formyltetrahydrofolate dehydrogenase GN=ALDH1L2	AL1L2_HUMAN	101.748	0.998	2	2	4	5.83e-05	0.0347	GVINIIPGSGGIAGQR	0.997	58.3	25	58.3	3	0	0	1508.85	642	657
Serum albumin GN=ALB	ALBU_HUMAN	69.3669	1	5	6	110	0.0016	0.0755	CASLQKFGER	0.997	47.1	25	38.3	8	0	0	1195.59	224	233
Serum albumin GN=ALB	ALBU_HUMAN	69.3669	1	5	6	110	0.0016	0.0755	YICENQDSISSK	0.997	30.6	25	19.6	9	0	0	1443.64	287	298
Serum albumin GN=ALB	ALBU_HUMAN	69.3669	1	5	6	110	0.0016	0.0755	KVPQVSTPTLVEVSR	0.997	90.2	25	90.2	40	39	0	1639.94	438	452
Serum albumin GN=ALB	ALBU_HUMAN	69.3669	1	5	6	110	0.0016	0.0755	VPQVSTPTLVEVSR	0.997	34	25	34	1	0	0	1511.84	439	452
Serum albumin GN=ALB	ALBU_HUMAN	69.3669	1	5	6	110	0.0016	0.0755	CCTESLVNR	0.997	45.8	25	45.8	13	0	0	1138.5	500	508
Fructose-bisphosphate aldolase A GN=ALDOA	ALDOA_HUMAN	39.4206	1	4	4	7	0.000102	0.132	IVAPGKGILAADESTGSIAK	0.997	31.5	25	31.5	0	2	0	1898.06	23	42
Fructose-bisphosphate aldolase A GN=ALDOA	ALDOA_HUMAN	39.4206	1	4	4	7	0.000102	0.132	ALQASALK	0.987	27	25	0	1	0	0	801.483	305	312
Fructose-bisphosphate aldolase A GN=ALDOA	ALDOA_HUMAN	39.4206	1	4	4	7	0.000102	0.132	AAQEEYVKR	0.997	40.5	25	40.2	2	0	0	1093.56	323	331
Fructose-bisphosphate aldolase A GN=ALDOA	ALDOA_HUMAN	39.4206	1	4	4	7	0.000102	0.132	ALANSLACQGK	0.997	49.5	25	43.3	2	0	0	1132.58	332	342
Ankyrin repeat and FYVE domain-containing protein 1 GN=ANKFY1	ANFY1_HUMAN	128.402	0.998	2	3	4	5.83e-05	0.0282	GSHTDAPDTATGNCLLQR	0.997	27.8	25	25.5	1	1	0	1913.88	447	464
Ankyrin repeat and FYVE domain-containing protein 1 GN=ANKFY1	ANFY1_HUMAN	128.402	0.998	2	3	4	5.83e-05	0.0282	AIDENNEPTACFLIR	0.997	41.3	25	39.9	2	0	0	1762.84	732	746
Protein arginine N-methyltransferase 1 GN=PRMT1	ANM1_HUMAN	41.5161	1	3	4	6	8.75e-05	0.102	KVIGIECSSISDYAVK	0.997	34.7	25	34.7	1	2	0	1768.92	103	118
Protein arginine N-methyltransferase 1 GN=PRMT1	ANM1_HUMAN	41.5161	1	3	4	6	8.75e-05	0.102	ATLYVTAIEDR	0.997	74.1	25	73.3	2	0	0	1251.66	186	196
Protein arginine N-methyltransferase 1 GN=PRMT1	ANM1_HUMAN	41.5161	1	3	4	6	8.75e-05	0.102	QLVTNACLIK	0.994	27.9	25	18.6	1	0	0	1159.65	234	243
Protein arginine N-methyltransferase 3 GN=PRMT3	ANM3_HUMAN	59.8772	0.998	2	2	3	4.37e-05	0.0452	ALSAEAALAR	0.997	70.8	25	49	2	0	0	972.547	169	178
Protein arginine N-methyltransferase 3 GN=PRMT3	ANM3_HUMAN	59.8772	0.998	2	2	3	4.37e-05	0.0452	AVIPEAVVEVLDPK	0.995	30.8	25	30.5	1	0	0	1478.85	397	410
Protein arginine N-methyltransferase 5 GN=PRMT5	ANM5_HUMAN	72.6851	1	34	48	318	0.00464	0.491	VSSGRDLNCVPEIADTLGAVAK	0.997	76.2	25	75.9	3	17	0	2272.16	14	35
Protein arginine N-methyltransferase 5 GN=PRMT5	ANM5_HUMAN	72.6851	1	34	48	318	0.00464	0.491	DLNCVPEIADTLGAVAK	0.997	50.8	25	47.5	20	2	0	1785.91	19	35
Protein arginine N-methyltransferase 5 GN=PRMT5	ANM5_HUMAN	72.6851	1	34	48	318	0.00464	0.491	QGFDFLCMPVFHPR	0.997	41.3	25	41.3	9	24	0	1766.81	36	49
Protein arginine N-methyltransferase 5 GN=PRMT5	ANM5_HUMAN	72.6851	1	34	48	318	0.00464	0.491	REFIQEPAK	0.997	38.5	25	26	2	0	0	1117.6	52	60
Protein arginine N-methyltransferase 5 GN=PRMT5	ANM5_HUMAN	72.6851	1	34	48	318	0.00464	0.491	EFIQEPAK	0.997	47.5	25	29.6	26	0	0	961.499	53	60
Protein arginine N-methyltransferase 5 GN=PRMT5	ANM5_HUMAN	72.6851	1	34	48	318	0.00464	0.491	EFIQEPAKNRPGPQTR	0.997	36.5	25	34	2	9	0	1867.98	53	68
Protein arginine N-methyltransferase 5 GN=PRMT5	ANM5_HUMAN	72.6851	1	34	48	318	0.00464	0.491	SDLLLSGR	0.997	35.7	25	13.9	1	0	0	860.484	69	76
Protein arginine N-methyltransferase 5 GN=PRMT5	ANM5_HUMAN	72.6851	1	34	48	318	0.00464	0.491	SDLLLSGRDWNTLIVGK	0.997	46.9	25	46	9	17	0	1887.03	69	85
Protein arginine N-methyltransferase 5 GN=PRMT5	ANM5_HUMAN	72.6851	1	34	48	318	0.00464	0.491	LSPWIRPDSKVEK	0.997	46.5	25	40.7	2	0	0	1554.86	86	98
Protein arginine N-methyltransferase 5 GN=PRMT5	ANM5_HUMAN	72.6851	1	34	48	318	0.00464	0.491	VPLVAPEDLR	0.997	50.1	25	50.1	4	0	0	1108.64	155	164
Protein arginine N-methyltransferase 5 GN=PRMT5	ANM5_HUMAN	72.6851	1	34	48	318	0.00464	0.491	VPLVAPEDLRDDIIENAPTTHTEEYSGEEK	0.997	36.5	25	36.5	0	2	0	3367.62	155	184
Protein arginine N-methyltransferase 5 GN=PRMT5	ANM5_HUMAN	72.6851	1	34	48	318	0.00464	0.491	TLCDYSKR	0.997	40.1	25	32.7	13	0	0	1042.5	194	201
Protein arginine N-methyltransferase 5 GN=PRMT5	ANM5_HUMAN	72.6851	1	34	48	318	0.00464	0.491	IAVALEIGADLPSNHVIDR	0.997	76.5	25	76.5	4	9	0	2003.09	202	220
Protein arginine N-methyltransferase 5 GN=PRMT5	ANM5_HUMAN	72.6851	1	34	48	318	0.00464	0.491	WLGEPIK	0.997	41.2	25	32.7	2	0	0	842.477	221	227
Protein arginine N-methyltransferase 5 GN=PRMT5	ANM5_HUMAN	72.6851	1	34	48	318	0.00464	0.491	WLGEPIKAAILPTSIFLTNK	0.997	32.4	25	32.4	0	2	0	2212.27	221	240
Protein arginine N-methyltransferase 5 GN=PRMT5	ANM5_HUMAN	72.6851	1	34	48	318	0.00464	0.491	AAILPTSIFLTNK	0.997	82.4	25	82.4	30	0	0	1388.81	228	240
Protein arginine N-methyltransferase 5 GN=PRMT5	ANM5_HUMAN	72.6851	1	34	48	318	0.00464	0.491	AAILPTSIFLTNKK	0.997	49.7	25	49.7	6	12	0	1516.91	228	241
Protein arginine N-methyltransferase 5 GN=PRMT5	ANM5_HUMAN	72.6851	1	34	48	318	0.00464	0.491	KGFPVLSK	0.997	48.8	25	36.2	20	0	0	875.535	241	248
Protein arginine N-methyltransferase 5 GN=PRMT5	ANM5_HUMAN	72.6851	1	34	48	318	0.00464	0.491	DPIKYSQYQQAIYK	0.997	57.9	25	57.2	2	2	0	1744.89	330	343
Protein arginine N-methyltransferase 5 GN=PRMT5	ANM5_HUMAN	72.6851	1	34	48	318	0.00464	0.491	YSQYQQAIYK	0.997	55.6	25	55.6	15	0	0	1291.63	334	343
Protein arginine N-methyltransferase 5 GN=PRMT5	ANM5_HUMAN	72.6851	1	34	48	318	0.00464	0.491	VPEEEKDTNVQVLMVLGAGR	0.997	52.2	25	52.2	0	4	0	2184.13	349	368
Protein arginine N-methyltransferase 5 GN=PRMT5	ANM5_HUMAN	72.6851	1	34	48	318	0.00464	0.491	DTNVQVLMVLGAGR	0.997	72.8	25	61.7	2	0	0	1472.79	355	368
Protein arginine N-methyltransferase 5 GN=PRMT5	ANM5_HUMAN	72.6851	1	34	48	318	0.00464	0.491	GPLVNASLR	0.997	56.3	25	48.8	4	0	0	926.542	369	377
Protein arginine N-methyltransferase 5 GN=PRMT5	ANM5_HUMAN	72.6851	1	34	48	318	0.00464	0.491	GPLVNASLRAAK	0.997	49.2	25	42	2	0	0	1196.71	369	380
Protein arginine N-methyltransferase 5 GN=PRMT5	ANM5_HUMAN	72.6851	1	34	48	318	0.00464	0.491	IKLYAVEK	0.997	38	25	26.8	4	0	0	963.587	386	393
Protein arginine N-methyltransferase 5 GN=PRMT5	ANM5_HUMAN	72.6851	1	34	48	318	0.00464	0.491	DDGVSIPGEYTSFLAPISSSK	0.997	43.9	25	43.9	3	0	0	2170.06	459	479
Protein arginine N-methyltransferase 5 GN=PRMT5	ANM5_HUMAN	72.6851	1	34	48	318	0.00464	0.491	LYNEVRACR	0.979	23.7	25	16	2	0	0	1180.59	480	488
Protein arginine N-methyltransferase 5 GN=PRMT5	ANM5_HUMAN	72.6851	1	34	48	318	0.00464	0.491	DRDPEAQFEMPYVVR	0.997	49.5	25	42.3	3	10	0	1851.87	491	505
Protein arginine N-methyltransferase 5 GN=PRMT5	ANM5_HUMAN	72.6851	1	34	48	318	0.00464	0.491	DPEAQFEMPYVVR	0.997	34.6	25	34.6	1	0	0	1580.74	493	505
Protein arginine N-methyltransferase 5 GN=PRMT5	ANM5_HUMAN	72.6851	1	34	48	318	0.00464	0.491	LHNFHQLSAPQPCFTFSHPNR	0.997	29.5	25	16.5	0	1	0	2535.21	506	526
Protein arginine N-methyltransferase 5 GN=PRMT5	ANM5_HUMAN	72.6851	1	34	48	318	0.00464	0.491	DPMIDNNR	0.996	28.3	25	28.3	2	0	0	974.436	527	534
Protein arginine N-methyltransferase 5 GN=PRMT5	ANM5_HUMAN	72.6851	1	34	48	318	0.00464	0.491	QPITVREGQTICVR	0.997	23	25	22.6	0	1	0	1656.89	588	601
Protein arginine N-methyltransferase 5 GN=PRMT5	ANM5_HUMAN	72.6851	1	34	48	318	0.00464	0.491	EGQTICVR	0.997	37.5	25	37.5	12	0	0	962.472	594	601
Protein arginine N-methyltransferase 5 GN=PRMT5	ANM5_HUMAN	72.6851	1	34	48	318	0.00464	0.491	EGQTICVRFWR	0.996	22.8	25	22.8	0	1	0	1451.72	594	604
Annexin A6 GN=ANXA6	ANXA6_HUMAN	75.8775	1	2	2	4	5.83e-05	0.0342	NKPLFFADKLYK	0.997	25.6	25	24.2	0	2	0	1483.83	599	610
Annexin A6 GN=ANXA6	ANXA6_HUMAN	75.8775	1	2	2	4	5.83e-05	0.0342	GAGTDEKTLTR	0.997	48.8	25	39.4	2	0	0	1148.59	614	624
AP-1 complex subunit beta-1 GN=AP1B1	AP1B1_HUMAN	104.639	1	2	2	2	2.92e-05	0.0221	CAIKVEQSAER	0.978	23.4	25	16.9	1	0	0	1290.65	380	390
AP-1 complex subunit beta-1 GN=AP1B1	AP1B1_HUMAN	104.639	1	2	2	2	2.92e-05	0.0221	GLEISGTFTR	0.995	35.9	25	29.9	1	0	0	1080.57	731	740
AP-1 complex subunit gamma-1 GN=AP1G1	AP1G1_HUMAN	91.3543	1	4	5	6	8.75e-05	0.0401	SSFREEDNTYR	0.997	25.7	25	25.7	0	1	0	1403.62	36	46
AP-1 complex subunit gamma-1 GN=AP1G1	AP1G1_HUMAN	91.3543	1	4	5	6	8.75e-05	0.0401	KAALCAVHVIR	0.993	22.4	25	22.4	0	1	0	1237.72	156	166
AP-1 complex subunit gamma-1 GN=AP1G1	AP1G1_HUMAN	91.3543	1	4	5	6	8.75e-05	0.0401	AALCAVHVIR	0.997	70.9	25	70.1	2	0	0	1109.62	157	166
AP-1 complex subunit gamma-1 GN=AP1G1	AP1G1_HUMAN	91.3543	1	4	5	6	8.75e-05	0.0401	TVQTDHNAVQR	0.997	42.6	25	36.7	1	1	0	1268.63	335	345
AP-1 complex subunit mu-1 GN=AP1M1	AP1M1_HUMAN	48.5878	1	8	8	13	0.000189	0.213	ILQEYITQEGHK	0.997	48.3	25	41.2	1	0	0	1458.76	130	141
AP-1 complex subunit mu-1 GN=AP1M1	AP1M1_HUMAN	48.5878	1	8	8	13	0.000189	0.213	VFLSGMPELR	0.997	38.5	25	30.2	1	0	0	1164.61	202	211
AP-1 complex subunit mu-1 GN=AP1M1	AP1M1_HUMAN	48.5878	1	8	8	13	0.000189	0.213	LGLNDKVLFDNTGR	0.997	44	25	43	2	0	0	1561.83	212	225
AP-1 complex subunit mu-1 GN=AP1M1	AP1M1_HUMAN	48.5878	1	8	8	13	0.000189	0.213	SVELEDVKFHQCVR	0.997	36.7	25	35	0	2	0	1745.86	230	243
AP-1 complex subunit mu-1 GN=AP1M1	AP1M1_HUMAN	48.5878	1	8	8	13	0.000189	0.213	STANNVEIHIPVPNDADSPK	0.997	38.5	25	38.5	0	2	0	2118.05	305	324
AP-1 complex subunit mu-1 GN=AP1M1	AP1M1_HUMAN	48.5878	1	8	8	13	0.000189	0.213	YLKIIEK	0.997	40.1	25	6.74	2	0	0	906.566	394	400
AP-1 complex subunit mu-1 GN=AP1M1	AP1M1_HUMAN	48.5878	1	8	8	13	0.000189	0.213	YITQNGDYQLR	0.997	33	25	33	1	0	0	1370.67	411	421
AP-1 complex subunit mu-1 GN=AP1M1	AP1M1_HUMAN	48.5878	1	8	8	13	0.000189	0.213	YITQNGDYQLRTQ	0.997	58	25	46.9	2	0	0	1599.78	411	423
AP-2 complex subunit alpha-1 GN=AP2A1	AP2A1_HUMAN	107.549	1	2	2	2	2.92e-05	0.0246	GLAVFISDIRNCK	0.997	38.2	25	38.2	1	0	0	1492.79	12	24
AP-2 complex subunit alpha-1 GN=AP2A1	AP2A1_HUMAN	107.549	1	2	2	2	2.92e-05	0.0246	LVECLETVLNK	0.997	43.7	25	31	1	0	0	1317.71	280	290
AP-2 complex subunit alpha-2 GN=AP2A2	AP2A2_HUMAN	103.963	1	3	3	3	4.37e-05	0.0607	GLAVFISDIRNCK	0.997	38.2	25	38.2	1	0	0	1492.79	12	24
AP-2 complex subunit alpha-2 GN=AP2A2	AP2A2_HUMAN	103.963	1	3	3	3	4.37e-05	0.0607	EMAEAFAGEIPK	0.992	30	25	24.5	1	0	0	1308.61	142	153
AP-2 complex subunit alpha-2 GN=AP2A2	AP2A2_HUMAN	103.963	1	3	3	3	4.37e-05	0.0607	TVFEALQAPACHENLVK	0.985	18.2	25	18.2	0	1	0	1926.97	481	497
AP-2 complex subunit alpha-2 GN=AP2A2	AP2A2_HUMAN	103.963	1	3	3	3	4.37e-05	0.0607	SDSQLRNADVELQQR	0.996	23.1	25	21.2	0	1	0	1758.87	564	578
AP-3 complex subunit mu-1 GN=AP3M1	AP3M1_HUMAN	46.94	1	4	4	6	8.75e-05	0.134	SVVSQSVCDYFFEAQEK	0.993	28.2	25	28.2	1	0	0	2022.91	22	38
AP-3 complex subunit mu-1 GN=AP3M1	AP3M1_HUMAN	46.94	1	4	4	6	8.75e-05	0.134	LLDDVSFHPCIR	0.997	31.1	25	26.2	0	2	0	1471.74	227	238
AP-3 complex subunit mu-1 GN=AP3M1	AP3M1_HUMAN	46.94	1	4	4	6	8.75e-05	0.134	VSSQNLVAIPVYVK	0.978	23.8	25	23.8	1	0	0	1516.87	264	277
AP-3 complex subunit mu-1 GN=AP3M1	AP3M1_HUMAN	46.94	1	4	4	6	8.75e-05	0.134	TIEGITVTVHMPK	0.997	43.9	25	37.5	2	0	0	1425.78	304	316
Anaphase-promoting complex subunit 1 GN=ANAPC1	APC1_HUMAN	216.503	1	4	4	4	5.83e-05	0.0303	FSEQGGTPQNVATSSSLTAHLR	0.997	34.4	25	34.4	0	1	0	2288.13	285	306
Anaphase-promoting complex subunit 1 GN=ANAPC1	APC1_HUMAN	216.503	1	4	4	4	5.83e-05	0.0303	SPSISNMAALSR	0.997	63.2	25	56.7	1	0	0	1233.63	341	352
Anaphase-promoting complex subunit 1 GN=ANAPC1	APC1_HUMAN	216.503	1	4	4	4	5.83e-05	0.0303	NFDFEGSLSPVIAPK	0.997	50.9	25	50.9	1	0	0	1620.83	680	694
Anaphase-promoting complex subunit 1 GN=ANAPC1	APC1_HUMAN	216.503	1	4	4	4	5.83e-05	0.0303	HLYVLAAEPR	0.978	22.8	25	18.7	1	0	0	1168.65	1608	1617
Anaphase-promoting complex subunit 7 GN=ANAPC7	APC7_HUMAN	66.8578	1	7	8	13	0.000189	0.14	AISTICSLEK	0.997	42.9	25	38	2	0	0	1121.59	254	263
Anaphase-promoting complex subunit 7 GN=ANAPC7	APC7_HUMAN	66.8578	1	7	8	13	0.000189	0.14	GMDVYGYLLAR	0.997	55	25	51.8	2	0	0	1257.63	307	317
Anaphase-promoting complex subunit 7 GN=ANAPC7	APC7_HUMAN	66.8578	1	7	8	13	0.000189	0.14	EGRLEDVENLGCR	0.976	18.9	25	14.1	0	1	0	1546.73	318	330
Anaphase-promoting complex subunit 7 GN=ANAPC7	APC7_HUMAN	66.8578	1	7	8	13	0.000189	0.14	AIQLNSNSVQALLLK	0.997	69.4	25	64.5	2	0	0	1611.94	365	379
Anaphase-promoting complex subunit 7 GN=ANAPC7	APC7_HUMAN	66.8578	1	7	8	13	0.000189	0.14	ALTQRPDYIK	0.987	24.4	25	20.3	1	0	0	1204.67	468	477
Anaphase-promoting complex subunit 7 GN=ANAPC7	APC7_HUMAN	66.8578	1	7	8	13	0.000189	0.14	EQKYEDGIALLR	0.997	27.8	25	20.8	1	2	0	1434.76	489	500
Anaphase-promoting complex subunit 7 GN=ANAPC7	APC7_HUMAN	66.8578	1	7	8	13	0.000189	0.14	NALANQSDCVLHR	0.997	56.7	25	47.3	2	0	0	1497.72	501	513
Apolipoprotein C-III GN=APOC3	APOC3_HUMAN	10.8523	0.998	2	2	5	7.29e-05	0.192	TAKDALSSVQESQVAQQAR	0.951	16.8	25	16.8	0	1	0	2017.03	42	60
Apolipoprotein C-III GN=APOC3	APOC3_HUMAN	10.8523	0.998	2	2	5	7.29e-05	0.192	DALSSVQESQVAQQAR	0.997	76.1	25	61.1	4	0	0	1716.85	45	60
Apolipoprotein O-like GN=APOOL	APOOL_HUMAN	29.1593	1	5	5	6	8.75e-05	0.28	YVEEQPGHLQMGFASIR	0.99	22.5	25	22.4	0	1	0	1961.95	53	69
Apolipoprotein O-like GN=APOOL	APOOL_HUMAN	29.1593	1	5	5	6	8.75e-05	0.28	MGVITVSGLAGLVSAR	0.997	82.4	25	79	2	0	0	1546.86	115	130
Apolipoprotein O-like GN=APOOL	APOOL_HUMAN	29.1593	1	5	5	6	8.75e-05	0.28	VYATSQQIFGAVK	0.997	42.9	25	28.3	1	0	0	1411.76	168	180
Apolipoprotein O-like GN=APOOL	APOOL_HUMAN	29.1593	1	5	5	6	8.75e-05	0.28	SSKEESLPKPK	0.997	28.7	25	28.7	0	1	0	1229.67	186	196
Apolipoprotein O-like GN=APOOL	APOOL_HUMAN	29.1593	1	5	5	6	8.75e-05	0.28	LGSSSEIEVPAKTTHVLK	0.988	20	25	20	0	1	0	1896.04	201	218
Armadillo repeat-containing protein 6 GN=ARMC6	ARMC6_HUMAN	54.1415	0.998	2	2	4	5.83e-05	0.0599	AIAGNDDVKDAIVR	0.997	64.8	25	62	2	0	0	1456.78	353	366
Armadillo repeat-containing protein 6 GN=ARMC6	ARMC6_HUMAN	54.1415	0.998	2	2	4	5.83e-05	0.0599	IIVEGGGAVAALQAMK	0.997	89	25	89	2	0	0	1527.86	407	422
Actin-related protein 2 GN=ACTR2	ARP2_HUMAN	44.7617	1	3	3	3	4.37e-05	0.0635	KVVVCDNGTGFVK	0.971	15.7	25	11.7	0	1	0	1422.74	7	19
Actin-related protein 2 GN=ACTR2	ARP2_HUMAN	44.7617	1	3	3	3	4.37e-05	0.0635	VVVCDNGTGFVK	0.997	33	25	33	1	0	0	1294.65	8	19
Actin-related protein 2 GN=ACTR2	ARP2_HUMAN	44.7617	1	3	3	3	4.37e-05	0.0635	ILLTEPPMNPTK	0.997	38	25	36.3	1	0	0	1353.74	107	118
Activating signal cointegrator 1 complex subunit 3 GN=ASCC3	ASCC3_HUMAN	251.467	1	7	8	15	0.000219	0.0359	ALAAEMTDYFSR	0.997	47.8	25	43.7	1	0	0	1390.63	541	552
Activating signal cointegrator 1 complex subunit 3 GN=ASCC3	ASCC3_HUMAN	251.467	1	7	8	15	0.000219	0.0359	RLEPLGIIVK	0.991	25.4	25	25.4	2	0	0	1137.74	553	562
Activating signal cointegrator 1 complex subunit 3 GN=ASCC3	ASCC3_HUMAN	251.467	1	7	8	15	0.000219	0.0359	SVGDVALSQIVR	0.997	49.5	25	45.3	2	0	0	1243.7	595	606
Activating signal cointegrator 1 complex subunit 3 GN=ASCC3	ASCC3_HUMAN	251.467	1	7	8	15	0.000219	0.0359	TVAAELAIFR	0.997	52.2	25	52.2	4	0	0	1090.63	1356	1365
Activating signal cointegrator 1 complex subunit 3 GN=ASCC3	ASCC3_HUMAN	251.467	1	7	8	15	0.000219	0.0359	VIELTGDVTPDMK	0.983	24.2	25	24.2	2	0	0	1433.72	1404	1416
Activating signal cointegrator 1 complex subunit 3 GN=ASCC3	ASCC3_HUMAN	251.467	1	7	8	15	0.000219	0.0359	AGRPQFDDQGK	0.997	28.1	25	28.1	0	2	0	1218.59	1690	1700
Activating signal cointegrator 1 complex subunit 3 GN=ASCC3	ASCC3_HUMAN	251.467	1	7	8	15	0.000219	0.0359	VSDSLTDLALK	0.991	27.4	25	22	2	0	0	1161.64	2192	2202
Asparagine synthetase [glutamine-hydrolyzing] GN=ASNS	ASNS_HUMAN	64.3717	1	8	10	19	0.000277	0.152	LAVVDPLFGMQPIR	0.997	54.5	25	52.7	4	0	0	1571.86	50	63
Asparagine synthetase [glutamine-hydrolyzing] GN=ASNS	ASNS_HUMAN	64.3717	1	8	10	19	0.000277	0.152	DTYGVRPLFK	0.986	24.3	25	20.9	2	0	0	1195.65	138	147
Asparagine synthetase [glutamine-hydrolyzing] GN=ASNS	ASNS_HUMAN	64.3717	1	8	10	19	0.000277	0.152	AMTEDGFLAVCSEAK	0.997	78.2	25	76.2	4	0	0	1644.72	148	162
Asparagine synthetase [glutamine-hydrolyzing] GN=ASNS	ASNS_HUMAN	64.3717	1	8	10	19	0.000277	0.152	VASVEMVK	0.949	19.5	25	11.4	1	0	0	862.47	196	203
Asparagine synthetase [glutamine-hydrolyzing] GN=ASNS	ASNS_HUMAN	64.3717	1	8	10	19	0.000277	0.152	ILFNNAVK	0.992	27.5	25	6.12	2	0	0	918.541	237	244
Asparagine synthetase [glutamine-hydrolyzing] GN=ASNS	ASNS_HUMAN	64.3717	1	8	10	19	0.000277	0.152	ELYLFDVLR	0.997	42.8	25	36.2	2	0	0	1167.64	396	404
Asparagine synthetase [glutamine-hydrolyzing] GN=ASNS	ASNS_HUMAN	64.3717	1	8	10	19	0.000277	0.152	EAFSDGITSVK	0.997	48.1	25	42	2	0	0	1153.57	468	478
Asparagine synthetase [glutamine-hydrolyzing] GN=ASNS	ASNS_HUMAN	64.3717	1	8	10	19	0.000277	0.152	WINATDPSAR	0.997	38.1	25	38.1	2	0	0	1130.56	541	550
Sodium/potassium-transporting ATPase subunit alpha-1 GN=ATP1A1	AT1A1_HUMAN	112.9	1	5	5	9	0.000131	0.0626	YGTDLSR	0.972	24.9	25	11.3	1	0	0	811.394	55	61
Sodium/potassium-transporting ATPase subunit alpha-1 GN=ATP1A1	AT1A1_HUMAN	112.9	1	5	5	9	0.000131	0.0626	AVAGDASESALLK	0.997	38.8	25	38.7	4	0	0	1231.65	446	458
Sodium/potassium-transporting ATPase subunit alpha-1 GN=ATP1A1	AT1A1_HUMAN	112.9	1	5	5	9	0.000131	0.0626	SAGIKVIMVTGDHPITAK	0.99	18.6	25	18.6	0	1	0	1838.02	608	625
Sodium/potassium-transporting ATPase subunit alpha-1 GN=ATP1A1	AT1A1_HUMAN	112.9	1	5	5	9	0.000131	0.0626	LNIPVSQVNPR	0.971	21.8	25	21.8	1	0	0	1236.71	648	658
Sodium/potassium-transporting ATPase subunit alpha-1 GN=ATP1A1	AT1A1_HUMAN	112.9	1	5	5	9	0.000131	0.0626	TSPQQKLIIVEGCQR	0.993	24.6	25	24.6	0	2	0	1756.94	693	707
Sarcoplasmic/endoplasmic reticulum calcium ATPase 2 GN=ATP2A2	AT2A2_HUMAN	114.759	1	7	8	16	0.000233	0.0969	NMLFSGTNIAAGK	0.986	30.9	25	30.9	2	0	0	1323.67	206	218
Sarcoplasmic/endoplasmic reticulum calcium ATPase 2 GN=ATP2A2	AT2A2_HUMAN	114.759	1	7	8	16	0.000233	0.0969	VGEATETALTCLVEK	0.997	66.7	25	62.4	2	0	0	1620.82	437	451
Sarcoplasmic/endoplasmic reticulum calcium ATPase 2 GN=ATP2A2	AT2A2_HUMAN	114.759	1	7	8	16	0.000233	0.0969	SMSVYCTPNKPSR	0.954	21.5	25	21.5	1	0	0	1526.71	493	505
Sarcoplasmic/endoplasmic reticulum calcium ATPase 2 GN=ATP2A2	AT2A2_HUMAN	114.759	1	7	8	16	0.000233	0.0969	IGIFGQDEDVTSK	0.997	60.7	25	57.9	4	0	0	1408.7	638	650
Sarcoplasmic/endoplasmic reticulum calcium ATPase 2 GN=ATP2A2	AT2A2_HUMAN	114.759	1	7	8	16	0.000233	0.0969	AFTGREFDELNPSAQR	0.981	16.9	25	16.9	0	1	0	1837.88	651	666
Sarcoplasmic/endoplasmic reticulum calcium ATPase 2 GN=ATP2A2	AT2A2_HUMAN	114.759	1	7	8	16	0.000233	0.0969	KAEIGIAMGSGTAVAK	0.997	36.4	25	36.4	0	3	0	1519.82	712	727
Sarcoplasmic/endoplasmic reticulum calcium ATPase 2 GN=ATP2A2	AT2A2_HUMAN	114.759	1	7	8	16	0.000233	0.0969	NYLEPGKECVQPATK	0.997	25.2	25	20.4	0	3	0	1733.85	989	1003
ATP synthase subunit s-like protein GN=ATP5SL	AT5SL_HUMAN	29.268	1	2	2	3	4.37e-05	0.0895	LGAAVAPEGNQK	0.978	22.1	25	17.3	1	0	0	1154.62	25	36
ATP synthase subunit s-like protein GN=ATP5SL	AT5SL_HUMAN	29.268	1	2	2	3	4.37e-05	0.0895	LKELQSLSLQR	0.997	43.9	25	43.9	2	0	0	1314.77	147	157
ATPase family AAA domain-containing protein 3A GN=ATAD3A	ATD3A_HUMAN	71.3702	1	24	30	75	0.00109	0.371	GLGDRPAPK	0.997	49.1	25	42	3	0	0	910.511	36	44
ATPase family AAA domain-containing protein 3A GN=ATAD3A	ATD3A_HUMAN	71.3702	1	24	30	75	0.00109	0.371	TLSEETRQHQAR	0.997	54.1	25	51.6	2	4	0	1455.73	166	177
ATPase family AAA domain-containing protein 3A GN=ATAD3A	ATD3A_HUMAN	71.3702	1	24	30	75	0.00109	0.371	AQYQDKLAR	0.997	48.6	25	38.7	4	0	0	1092.58	178	186
ATPase family AAA domain-containing protein 3A GN=ATAD3A	ATD3A_HUMAN	71.3702	1	24	30	75	0.00109	0.371	ATVEREMELR	0.997	32.5	25	16.8	2	0	0	1233.63	220	229
ATPase family AAA domain-containing protein 3A GN=ATAD3A	ATD3A_HUMAN	71.3702	1	24	30	75	0.00109	0.371	ENADIIREQIR	0.997	26.4	25	25.4	2	2	0	1356.72	250	260
ATPase family AAA domain-containing protein 3A GN=ATAD3A	ATD3A_HUMAN	71.3702	1	24	30	75	0.00109	0.371	AAEHRQTVLESIR	0.997	36.2	25	36.2	1	2	0	1509.81	263	275
ATPase family AAA domain-containing protein 3A GN=ATAD3A	ATD3A_HUMAN	71.3702	1	24	30	75	0.00109	0.371	QTVLESIR	0.997	43.9	25	24.5	2	0	0	945.536	268	275
ATPase family AAA domain-containing protein 3A GN=ATAD3A	ATD3A_HUMAN	71.3702	1	24	30	75	0.00109	0.371	TAGTLFGEGFR	0.997	71.4	25	67.8	4	0	0	1155.58	276	286
ATPase family AAA domain-containing protein 3A GN=ATAD3A	ATD3A_HUMAN	71.3702	1	24	30	75	0.00109	0.371	NATLVAGRFIEAR	0.994	27.1	25	18.3	1	0	0	1417.79	314	326
ATPase family AAA domain-containing protein 3A GN=ATAD3A	ATD3A_HUMAN	71.3702	1	24	30	75	0.00109	0.371	LGKPSLVR	0.997	37.1	25	30	4	0	0	869.557	327	334
ATPase family AAA domain-containing protein 3A GN=ATAD3A	ATD3A_HUMAN	71.3702	1	24	30	75	0.00109	0.371	ITVLEALR	0.997	45.7	25	31	2	0	0	914.567	339	346
ATPase family AAA domain-containing protein 3A GN=ATAD3A	ATD3A_HUMAN	71.3702	1	24	30	75	0.00109	0.371	ITVLEALRHPIQVSR	0.997	45.5	25	45.5	0	4	0	1732.02	339	353
ATPase family AAA domain-containing protein 3A GN=ATAD3A	ATD3A_HUMAN	71.3702	1	24	30	75	0.00109	0.371	LLSRPQDALEGVVLSPSLEAR	0.997	33.2	25	32.1	0	2	0	2250.25	355	375
ATPase family AAA domain-containing protein 3A GN=ATAD3A	ATD3A_HUMAN	71.3702	1	24	30	75	0.00109	0.371	VRDIAIATR	0.997	44.2	25	36.6	4	0	0	1014.61	376	384
ATPase family AAA domain-containing protein 3A GN=ATAD3A	ATD3A_HUMAN	71.3702	1	24	30	75	0.00109	0.371	SLYRNILMYGPPGTGK	0.997	28.7	25	28.7	0	2	0	1766.93	391	406
ATPase family AAA domain-containing protein 3A GN=ATAD3A	ATD3A_HUMAN	71.3702	1	24	30	75	0.00109	0.371	NILMYGPPGTGK	0.997	58.5	25	53.8	4	0	0	1263.64	395	406
ATPase family AAA domain-containing protein 3A GN=ATAD3A	ATD3A_HUMAN	71.3702	1	24	30	75	0.00109	0.371	LALHSGMDYAIMTGGDVAPMGR	0.997	39	25	39	0	4	0	2311.05	413	434
ATPase family AAA domain-containing protein 3A GN=ATAD3A	ATD3A_HUMAN	71.3702	1	24	30	75	0.00109	0.371	LFDWANTSR	0.962	21.5	25	16.3	1	0	0	1109.54	443	451
ATPase family AAA domain-containing protein 3A GN=ATAD3A	ATD3A_HUMAN	71.3702	1	24	30	75	0.00109	0.371	MYFDKYVLKPATEGK	0.997	25.7	25	25.7	0	4	0	1805.91	535	549
ATPase family AAA domain-containing protein 3A GN=ATAD3A	ATD3A_HUMAN	71.3702	1	24	30	75	0.00109	0.371	LKLAQFDYGR	0.997	41.6	25	41.6	2	2	0	1210.66	552	561
ATPase family AAA domain-containing protein 3A GN=ATAD3A	ATD3A_HUMAN	71.3702	1	24	30	75	0.00109	0.371	LAQFDYGR	0.997	46.7	25	46.7	2	0	0	969.479	554	561
ATPase family AAA domain-containing protein 3A GN=ATAD3A	ATD3A_HUMAN	71.3702	1	24	30	75	0.00109	0.371	LAQFDYGRK	0.997	37.8	25	37.8	4	0	0	1097.57	554	562
ATPase family AAA domain-containing protein 3A GN=ATAD3A	ATD3A_HUMAN	71.3702	1	24	30	75	0.00109	0.371	LTEGMSGR	0.997	39.7	25	39.7	2	0	0	850.409	569	576
ATPase family AAA domain-containing protein 3A GN=ATAD3A	ATD3A_HUMAN	71.3702	1	24	30	75	0.00109	0.371	AEGPGRGDEPSPS	0.99	28.1	25	28.1	3	0	0	1255.56	622	634
ATPase family AAA domain-containing protein 3B GN=ATAD3B	ATD3B_HUMAN	72.574	1	4	4	4	5.83e-05	0.327	GLGDRPAPK	0.997	49.1	25	42	3	0	0	910.511	36	44
ATPase family AAA domain-containing protein 3B GN=ATAD3B	ATD3B_HUMAN	72.574	1	4	4	4	5.83e-05	0.327	TLSEETRQHQAR	0.997	54.1	25	51.6	2	4	0	1455.73	118	129
ATPase family AAA domain-containing protein 3B GN=ATAD3B	ATD3B_HUMAN	72.574	1	4	4	4	5.83e-05	0.327	AQYQDKLAR	0.997	48.6	25	38.7	4	0	0	1092.58	130	138
ATPase family AAA domain-containing protein 3B GN=ATAD3B	ATD3B_HUMAN	72.574	1	4	4	4	5.83e-05	0.327	ATVEREMELR	0.997	32.5	25	16.8	2	0	0	1233.63	172	181
ATPase family AAA domain-containing protein 3B GN=ATAD3B	ATD3B_HUMAN	72.574	1	4	4	4	5.83e-05	0.327	ENADIIREQIR	0.997	26.4	25	25.4	2	2	0	1356.72	202	212
ATPase family AAA domain-containing protein 3B GN=ATAD3B	ATD3B_HUMAN	72.574	1	4	4	4	5.83e-05	0.327	QTVLESIR	0.997	43.9	25	24.5	2	0	0	945.536	220	227
ATPase family AAA domain-containing protein 3B GN=ATAD3B	ATD3B_HUMAN	72.574	1	4	4	4	5.83e-05	0.327	TAGTLFGEGFR	0.997	71.4	25	67.8	4	0	0	1155.58	228	238
ATPase family AAA domain-containing protein 3B GN=ATAD3B	ATD3B_HUMAN	72.574	1	4	4	4	5.83e-05	0.327	LGKPSLVR	0.997	37.1	25	30	4	0	0	869.557	279	286
ATPase family AAA domain-containing protein 3B GN=ATAD3B	ATD3B_HUMAN	72.574	1	4	4	4	5.83e-05	0.327	ITVLEALR	0.997	45.7	25	31	2	0	0	914.567	291	298
ATPase family AAA domain-containing protein 3B GN=ATAD3B	ATD3B_HUMAN	72.574	1	4	4	4	5.83e-05	0.327	ITVLEALRHPIQVSR	0.997	45.5	25	45.5	0	4	0	1732.02	291	305
ATPase family AAA domain-containing protein 3B GN=ATAD3B	ATD3B_HUMAN	72.574	1	4	4	4	5.83e-05	0.327	LLSRPQDVLEGVVLSPSLEAR	0.989	19.5	25	19.5	0	1	0	2278.28	307	327
ATPase family AAA domain-containing protein 3B GN=ATAD3B	ATD3B_HUMAN	72.574	1	4	4	4	5.83e-05	0.327	VRDIAIATR	0.997	44.2	25	36.6	4	0	0	1014.61	328	336
ATPase family AAA domain-containing protein 3B GN=ATAD3B	ATD3B_HUMAN	72.574	1	4	4	4	5.83e-05	0.327	LALHSGMDYAIMTGGDVAPMGR	0.997	39	25	39	0	4	0	2311.05	365	386
ATPase family AAA domain-containing protein 3B GN=ATAD3B	ATD3B_HUMAN	72.574	1	4	4	4	5.83e-05	0.327	LFDWANTSR	0.962	21.5	25	16.3	1	0	0	1109.54	395	403
ATPase family AAA domain-containing protein 3B GN=ATAD3B	ATD3B_HUMAN	72.574	1	4	4	4	5.83e-05	0.327	GLLLFMDEADAFLR	0.997	52.6	25	52.6	1	0	0	1626.82	405	418
ATPase family AAA domain-containing protein 3B GN=ATAD3B	ATD3B_HUMAN	72.574	1	4	4	4	5.83e-05	0.327	ATEEISKDLR	0.978	24.1	25	7.23	1	0	0	1161.61	421	430
ATPase family AAA domain-containing protein 3B GN=ATAD3B	ATD3B_HUMAN	72.574	1	4	4	4	5.83e-05	0.327	LHFDNCVLKPATEGK	0.997	37.2	25	36.5	0	1	0	1728.87	487	501
ATPase family AAA domain-containing protein 3B GN=ATAD3B	ATD3B_HUMAN	72.574	1	4	4	4	5.83e-05	0.327	LKLAQFDYGR	0.997	41.6	25	41.6	2	2	0	1210.66	504	513
ATPase family AAA domain-containing protein 3B GN=ATAD3B	ATD3B_HUMAN	72.574	1	4	4	4	5.83e-05	0.327	LAQFDYGR	0.997	46.7	25	46.7	2	0	0	969.479	506	513
ATPase family AAA domain-containing protein 3B GN=ATAD3B	ATD3B_HUMAN	72.574	1	4	4	4	5.83e-05	0.327	LAQFDYGRK	0.997	37.8	25	37.8	4	0	0	1097.57	506	514
ATPase family AAA domain-containing protein 3B GN=ATAD3B	ATD3B_HUMAN	72.574	1	4	4	4	5.83e-05	0.327	LTEGMSGR	0.997	39.7	25	39.7	2	0	0	850.409	521	528
ATP synthase subunit alpha, mitochondrial GN=ATP5A1	ATPA_HUMAN	59.7521	1	18	24	96	0.0014	0.349	ILGADTSVDLEETGRVLSIGDGIAR	0.997	66.5	25	66.5	0	2	0	2557.35	59	83
ATP synthase subunit alpha, mitochondrial GN=ATP5A1	ATPA_HUMAN	59.7521	1	18	24	96	0.0014	0.349	TGAIVDVPVGEELLGR	0.997	73.4	25	73.4	8	0	0	1624.89	134	149
ATP synthase subunit alpha, mitochondrial GN=ATP5A1	ATPA_HUMAN	59.7521	1	18	24	96	0.0014	0.349	VVDALGNAIDGKGPIGSK	0.997	57.6	25	57.6	2	3	0	1710.94	150	167
ATP synthase subunit alpha, mitochondrial GN=ATP5A1	ATPA_HUMAN	59.7521	1	18	24	96	0.0014	0.349	VGLKAPGIIPR	0.997	39	25	39	3	0	0	1120.72	172	182
ATP synthase subunit alpha, mitochondrial GN=ATP5A1	ATPA_HUMAN	59.7521	1	18	24	96	0.0014	0.349	ISVREPMQTGIK	0.997	45.8	25	39	3	3	0	1358.75	183	194
ATP synthase subunit alpha, mitochondrial GN=ATP5A1	ATPA_HUMAN	59.7521	1	18	24	96	0.0014	0.349	AVDSLVPIGR	0.997	55.1	25	55	10	0	0	1026.59	195	204
ATP synthase subunit alpha, mitochondrial GN=ATP5A1	ATPA_HUMAN	59.7521	1	18	24	96	0.0014	0.349	AVDSLVPIGRGQR	0.997	57.3	25	43.6	2	2	0	1367.78	195	207
ATP synthase subunit alpha, mitochondrial GN=ATP5A1	ATPA_HUMAN	59.7521	1	18	24	96	0.0014	0.349	ELIIGDR	0.992	26.8	25	16.2	1	0	0	815.462	208	214
ATP synthase subunit alpha, mitochondrial GN=ATP5A1	ATPA_HUMAN	59.7521	1	18	24	96	0.0014	0.349	ELIIGDRQTGK	0.997	45.4	25	30.5	7	0	0	1229.69	208	218
ATP synthase subunit alpha, mitochondrial GN=ATP5A1	ATPA_HUMAN	59.7521	1	18	24	96	0.0014	0.349	TSIAIDTIINQK	0.997	56.7	25	55.4	5	0	0	1316.74	219	230
ATP synthase subunit alpha, mitochondrial GN=ATP5A1	ATPA_HUMAN	59.7521	1	18	24	96	0.0014	0.349	TSIAIDTIINQKR	0.997	69	25	69	7	3	0	1472.84	219	231
ATP synthase subunit alpha, mitochondrial GN=ATP5A1	ATPA_HUMAN	59.7521	1	18	24	96	0.0014	0.349	STVAQLVKR	0.997	57.4	25	46.9	10	0	0	1001.61	254	262
ATP synthase subunit alpha, mitochondrial GN=ATP5A1	ATPA_HUMAN	59.7521	1	18	24	96	0.0014	0.349	HALIIYDDLSK	0.997	50.1	25	46.4	8	0	0	1287.69	306	316
ATP synthase subunit alpha, mitochondrial GN=ATP5A1	ATPA_HUMAN	59.7521	1	18	24	96	0.0014	0.349	EAYPGDVFYLHSR	0.997	59.6	25	59.2	9	0	0	1553.74	335	347
ATP synthase subunit alpha, mitochondrial GN=ATP5A1	ATPA_HUMAN	59.7521	1	18	24	96	0.0014	0.349	EAYPGDVFYLHSRLLER	0.994	19.7	25	17.9	0	1	0	2065.05	335	351
ATP synthase subunit alpha, mitochondrial GN=ATP5A1	ATPA_HUMAN	59.7521	1	18	24	96	0.0014	0.349	GIRPAINVGLSVSR	0.997	37.9	25	37.9	0	4	0	1438.85	403	416
ATP synthase subunit alpha, mitochondrial GN=ATP5A1	ATPA_HUMAN	59.7521	1	18	24	96	0.0014	0.349	GVRLTELLK	0.96	21.3	25	4.9	1	0	0	1028.65	464	472
ATP synthase subunit alpha, mitochondrial GN=ATP5A1	ATPA_HUMAN	59.7521	1	18	24	96	0.0014	0.349	LKEIVTNFLAGFEA	0.997	62.3	25	62.3	2	0	0	1551.84	540	553
ATP synthase subunit beta, mitochondrial GN=ATP5B	ATPB_HUMAN	56.5606	1	12	19	62	0.000904	0.333	LVLEVAQHLGESTVR	0.997	73.8	25	73.8	2	2	0	1650.92	95	109
ATP synthase subunit beta, mitochondrial GN=ATP5B	ATPB_HUMAN	56.5606	1	12	19	62	0.000904	0.333	TIAMDGTEGLVR	0.997	60.4	25	50.1	9	0	0	1262.64	110	121
ATP synthase subunit beta, mitochondrial GN=ATP5B	ATPB_HUMAN	56.5606	1	12	19	62	0.000904	0.333	VLDSGAPIKIPVGPETLGR	0.997	60.7	25	60.7	2	9	0	1919.1	125	143
ATP synthase subunit beta, mitochondrial GN=ATP5B	ATPB_HUMAN	56.5606	1	12	19	62	0.000904	0.333	VVDLLAPYAK	0.997	41.3	25	41.3	4	0	0	1088.64	189	198
ATP synthase subunit beta, mitochondrial GN=ATP5B	ATPB_HUMAN	56.5606	1	12	19	62	0.000904	0.333	IGLFGGAGVGK	0.997	37.7	25	30.2	4	0	0	975.562	202	212
ATP synthase subunit beta, mitochondrial GN=ATP5B	ATPB_HUMAN	56.5606	1	12	19	62	0.000904	0.333	TVLIMELINNVAK	0.997	54.8	25	54.8	3	0	0	1473.83	213	225
ATP synthase subunit beta, mitochondrial GN=ATP5B	ATPB_HUMAN	56.5606	1	12	19	62	0.000904	0.333	AHGGYSVFAGVGER	0.997	54	25	53.4	2	4	0	1406.68	226	239
ATP synthase subunit beta, mitochondrial GN=ATP5B	ATPB_HUMAN	56.5606	1	12	19	62	0.000904	0.333	VALVYGQMNEPPGAR	0.997	61.5	25	47.9	7	0	0	1601.81	265	279
ATP synthase subunit beta, mitochondrial GN=ATP5B	ATPB_HUMAN	56.5606	1	12	19	62	0.000904	0.333	FTQAGSEVSALLGR	0.997	84.6	25	79	2	0	0	1435.75	311	324
ATP synthase subunit beta, mitochondrial GN=ATP5B	ATPB_HUMAN	56.5606	1	12	19	62	0.000904	0.333	AIAELGIYPAVDPLDSTSR	0.997	62.6	25	62.6	8	0	0	1988.03	388	406
ATP synthase subunit beta, mitochondrial GN=ATP5B	ATPB_HUMAN	56.5606	1	12	19	62	0.000904	0.333	IMDPNIVGSEHYDVAR	0.997	23.4	25	21.6	0	2	0	1815.87	407	422
ATP synthase subunit beta, mitochondrial GN=ATP5B	ATPB_HUMAN	56.5606	1	12	19	62	0.000904	0.333	FLSQPFQVAEVFTGHMGK	0.997	35.4	25	34	0	2	0	2023.01	463	480
ATP synthase subunit gamma, mitochondrial GN=ATP5C1	ATPG_HUMAN	32.998	1	10	15	30	0.000437	0.346	IYGLGSLALYEK	0.997	78.6	25	71.5	4	0	0	1326.73	68	79
ATP synthase subunit gamma, mitochondrial GN=ATP5C1	ATPG_HUMAN	32.998	1	10	15	30	0.000437	0.346	HLLIGVSSDR	0.997	50	25	32.6	2	0	0	1096.61	91	100
ATP synthase subunit gamma, mitochondrial GN=ATP5C1	ATPG_HUMAN	32.998	1	10	15	30	0.000437	0.346	GLCGAIHSSIAK	0.997	66.6	25	66.6	2	1	0	1213.64	101	112
ATP synthase subunit gamma, mitochondrial GN=ATP5C1	ATPG_HUMAN	32.998	1	10	15	30	0.000437	0.346	QMKSEVATLTAAGK	0.986	20.4	25	19.7	0	1	0	1450.76	113	126
ATP synthase subunit gamma, mitochondrial GN=ATP5C1	ATPG_HUMAN	32.998	1	10	15	30	0.000437	0.346	SEVATLTAAGK	0.997	69.1	25	49	2	0	0	1047.57	116	126
ATP synthase subunit gamma, mitochondrial GN=ATP5C1	ATPG_HUMAN	32.998	1	10	15	30	0.000437	0.346	EVMLVGIGDKIR	0.997	73.4	25	66.2	4	0	0	1329.76	127	138
ATP synthase subunit gamma, mitochondrial GN=ATP5C1	ATPG_HUMAN	32.998	1	10	15	30	0.000437	0.346	THSDQFLVAFK	0.997	73.7	25	65.3	2	0	0	1292.66	144	154
ATP synthase subunit gamma, mitochondrial GN=ATP5C1	ATPG_HUMAN	32.998	1	10	15	30	0.000437	0.346	THSDQFLVAFKEVGR	0.997	40.2	25	40.2	0	2	0	1733.9	144	158
ATP synthase subunit gamma, mitochondrial GN=ATP5C1	ATPG_HUMAN	32.998	1	10	15	30	0.000437	0.346	NASEMIDKLTLTFNR	0.997	66.1	25	66.1	4	4	0	1752.89	263	277
ATP synthase subunit gamma, mitochondrial GN=ATP5C1	ATPG_HUMAN	32.998	1	10	15	30	0.000437	0.346	ELIEIISGAAALD	0.997	31.3	25	31.3	2	0	0	1314.72	286	298
ATP synthase subunit O, mitochondrial GN=ATP5O	ATPO_HUMAN	23.2774	0.998	2	2	2	2.92e-05	0.0986	VAQILKEPK	0.991	29.4	25	15.2	1	0	0	1025.64	65	73
ATP synthase subunit O, mitochondrial GN=ATP5O	ATPO_HUMAN	23.2774	0.998	2	2	2	2.92e-05	0.0986	VAASVLNPYVKR	0.95	19.2	25	19.2	1	0	0	1316.77	74	85
Serine/threonine-protein kinase ATR GN=ATR	ATR_HUMAN	301.373	1	3	3	4	5.83e-05	0.0102	ASPAASALIR	0.986	29.6	25	17	1	0	0	956.552	1006	1015
Serine/threonine-protein kinase ATR GN=ATR	ATR_HUMAN	301.373	1	3	3	4	5.83e-05	0.0102	LGQLLLSAK	0.954	33.6	25	33.6	1	0	0	942.598	1804	1812
Serine/threonine-protein kinase ATR GN=ATR	ATR_HUMAN	301.373	1	3	3	4	5.83e-05	0.0102	LAELYVER	0.997	52.7	25	17.1	2	0	0	992.541	1952	1959
Ataxin-10 GN=ATXN10	ATX10_HUMAN	53.4908	1	3	3	5	7.29e-05	0.0653	ALTALFKEQR	0.997	43.2	25	43.2	2	0	0	1176.67	28	37
Ataxin-10 GN=ATXN10	ATX10_HUMAN	53.4908	1	3	3	5	7.29e-05	0.0653	VLDILKK	0.962	20.6	25	13.3	1	0	0	828.556	50	56
Ataxin-10 GN=ATXN10	ATX10_HUMAN	53.4908	1	3	3	5	7.29e-05	0.0653	NACIECSVNQNSIR	0.997	76	25	66.7	2	0	0	1664.75	90	103
[3-methyl-2-oxobutanoate dehydrogenase [lipoamide]] kinase, mitochondrial GN=BCKDK	BCKD_HUMAN	46.3624	1	4	5	8	0.000117	0.124	TVTSFYNQSAIDAAAEKPSVR	0.977	19.5	25	19.5	0	1	0	2255.13	49	69
[3-methyl-2-oxobutanoate dehydrogenase [lipoamide]] kinase, mitochondrial GN=BCKDK	BCKD_HUMAN	46.3624	1	4	5	8	0.000117	0.124	LTPTMMLYAGR	0.997	39.7	25	0	3	0	0	1269.63	70	80
[3-methyl-2-oxobutanoate dehydrogenase [lipoamide]] kinase, mitochondrial GN=BCKDK	BCKD_HUMAN	46.3624	1	4	5	8	0.000117	0.124	YLQQELPVR	0.997	58.8	25	46.4	3	0	0	1145.63	93	101
[3-methyl-2-oxobutanoate dehydrogenase [lipoamide]] kinase, mitochondrial GN=BCKDK	BCKD_HUMAN	46.3624	1	4	5	8	0.000117	0.124	YFLDKTLTSR	0.997	33.3	25	23.4	1	0	0	1243.67	188	197
Bcl-2-associated transcription factor 1 GN=BCLAF1	BCLF1_HUMAN	106.125	1	18	22	61	0.000889	0.202	KAEGEPQEESPLK	0.997	43	25	34.6	3	1	0	1441.72	168	180
Bcl-2-associated transcription factor 1 GN=BCLAF1	BCLF1_HUMAN	106.125	1	18	22	61	0.000889	0.202	TIAPQNAPR	0.997	43	25	22.3	4	0	0	967.532	304	312
Bcl-2-associated transcription factor 1 GN=BCLAF1	BCLF1_HUMAN	106.125	1	18	22	61	0.000889	0.202	TIAPQNAPRDESR	0.996	29.2	25	24.8	2	0	0	1454.73	304	316
Bcl-2-associated transcription factor 1 GN=BCLAF1	BCLF1_HUMAN	106.125	1	18	22	61	0.000889	0.202	GRSSFYPDGGDQETAK	0.989	17.8	25	16.9	0	1	0	1714.77	317	332
Bcl-2-associated transcription factor 1 GN=BCLAF1	BCLF1_HUMAN	106.125	1	18	22	61	0.000889	0.202	SSFYPDGGDQETAK	0.997	47.7	25	47.7	6	0	0	1501.64	319	332
Bcl-2-associated transcription factor 1 GN=BCLAF1	BCLF1_HUMAN	106.125	1	18	22	61	0.000889	0.202	SSFYPDGGDQETAKTGK	0.997	51.3	25	49.7	4	2	0	1787.81	319	335
Bcl-2-associated transcription factor 1 GN=BCLAF1	BCLF1_HUMAN	106.125	1	18	22	61	0.000889	0.202	SVLADQGKSFATASHR	0.997	63.5	25	63.5	0	6	0	1674.86	414	429
Bcl-2-associated transcription factor 1 GN=BCLAF1	BCLF1_HUMAN	106.125	1	18	22	61	0.000889	0.202	NTEEEGLKYK	0.997	40	25	28.6	11	0	0	1210.6	430	439
Bcl-2-associated transcription factor 1 GN=BCLAF1	BCLF1_HUMAN	106.125	1	18	22	61	0.000889	0.202	LKETGYVVERPSTTK	0.955	16.2	25	15.6	0	1	0	1707.93	461	475
Bcl-2-associated transcription factor 1 GN=BCLAF1	BCLF1_HUMAN	106.125	1	18	22	61	0.000889	0.202	ETQSPEQVKSEK	0.959	21.2	25	15.9	1	0	0	1389.69	493	504
Bcl-2-associated transcription factor 1 GN=BCLAF1	BCLF1_HUMAN	106.125	1	18	22	61	0.000889	0.202	LKDLFDYSPPLHK	0.963	15.9	25	15.9	0	1	0	1572.84	505	517
Bcl-2-associated transcription factor 1 GN=BCLAF1	BCLF1_HUMAN	106.125	1	18	22	61	0.000889	0.202	STFREESPLR	0.997	25.8	25	23.4	1	3	0	1221.62	525	534
Bcl-2-associated transcription factor 1 GN=BCLAF1	BCLF1_HUMAN	106.125	1	18	22	61	0.000889	0.202	MIASDSHRPEVK	0.972	16	25	13.1	0	1	0	1369.69	537	548
Bcl-2-associated transcription factor 1 GN=BCLAF1	BCLF1_HUMAN	106.125	1	18	22	61	0.000889	0.202	LLASTLVHSVK	0.97	21.7	25	17.8	1	0	0	1167.71	570	580
Bcl-2-associated transcription factor 1 GN=BCLAF1	BCLF1_HUMAN	106.125	1	18	22	61	0.000889	0.202	SIFDHIKLPQASK	0.997	35.6	25	31.6	0	3	0	1483.83	587	599
Bcl-2-associated transcription factor 1 GN=BCLAF1	BCLF1_HUMAN	106.125	1	18	22	61	0.000889	0.202	SAAMTLNER	0.997	31.1	25	24.3	5	0	0	992.483	623	631
Bcl-2-associated transcription factor 1 GN=BCLAF1	BCLF1_HUMAN	106.125	1	18	22	61	0.000889	0.202	SAAMTLNERFTSYQK	0.997	41	25	41	1	1	0	1746.85	623	637
Bcl-2-associated transcription factor 1 GN=BCLAF1	BCLF1_HUMAN	106.125	1	18	22	61	0.000889	0.202	RPKEEEWDPEYTPK	0.997	28.1	25	28.1	0	2	0	1803.86	829	842
Beta-galactosidase GN=GLB1	BGAL_HUMAN	76.0777	1	8	10	18	0.000262	0.168	DSFLKDGQPFR	0.997	36.9	25	36.9	2	1	0	1309.65	39	49
Beta-galactosidase GN=GLB1	BGAL_HUMAN	76.0777	1	8	10	18	0.000262	0.168	YISGSIHYSR	0.997	61.1	25	60.4	2	0	0	1182.59	50	59
Beta-galactosidase GN=GLB1	BGAL_HUMAN	76.0777	1	8	10	18	0.000262	0.168	TEAVASSLYDILAR	0.997	71.4	25	71.4	2	0	0	1508.8	286	299
Beta-galactosidase GN=GLB1	BGAL_HUMAN	76.0777	1	8	10	18	0.000262	0.168	TVGAALDILCPSGPIK	0.997	62.2	25	62.2	2	0	0	1611.88	384	399
Beta-galactosidase GN=GLB1	BGAL_HUMAN	76.0777	1	8	10	18	0.000262	0.168	SLYPLTFIQVK	0.986	26.6	25	26.6	1	0	0	1308.76	400	410
Beta-galactosidase GN=GLB1	BGAL_HUMAN	76.0777	1	8	10	18	0.000262	0.168	TTLPQDCSNPAPLSSPLNGVHDR	0.997	43.2	25	41.8	0	2	0	2476.19	420	442
Beta-galactosidase GN=GLB1	BGAL_HUMAN	76.0777	1	8	10	18	0.000262	0.168	AYVAVDGIPQGVLER	0.997	64.4	25	64.4	2	0	0	1586.85	443	457
Beta-galactosidase GN=GLB1	BGAL_HUMAN	76.0777	1	8	10	18	0.000262	0.168	AGATLDLLVENMGR	0.997	69.4	25	64	4	0	0	1459.76	469	482
Ribosome biogenesis protein BMS1 homolog GN=BMS1	BMS1_HUMAN	145.812	0.999	2	2	3	4.37e-05	0.0156	AFAVQSAVR	0.997	58.3	25	50	2	0	0	948.526	44	52
Ribosome biogenesis protein BMS1 homolog GN=BMS1	BMS1_HUMAN	145.812	0.999	2	2	3	4.37e-05	0.0156	SSLKGAEGQLQ	0.997	34.5	25	18.3	1	0	0	1117.58	1272	1282
Lys-63-specific deubiquitinase BRCC36 GN=BRCC3	BRCC3_HUMAN	36.0711	1	4	4	7	0.000102	0.146	TVAEKVDAVR	0.997	53.8	25	40.3	2	0	0	1087.61	61	70
Lys-63-specific deubiquitinase BRCC36 GN=BRCC3	BRCC3_HUMAN	36.0711	1	4	4	7	0.000102	0.146	VLYTCFQSIQAQK	0.997	51.1	25	46.1	2	0	0	1585.8	168	180
Lys-63-specific deubiquitinase BRCC36 GN=BRCC3	BRCC3_HUMAN	36.0711	1	4	4	7	0.000102	0.146	VCLESAVELPK	0.997	42.4	25	29.9	2	0	0	1244.66	227	237
Lys-63-specific deubiquitinase BRCC36 GN=BRCC3	BRCC3_HUMAN	36.0711	1	4	4	7	0.000102	0.146	IHSLTHLDSVTK	0.948	18	25	18	0	1	0	1350.74	250	261
Ribosome biogenesis protein BRX1 homolog GN=BRIX1	BRX1_HUMAN	41.403	0.999	2	2	3	4.37e-05	0.0567	ILIFSSR	0.997	33.2	25	24.7	2	0	0	835.504	62	68
Ribosome biogenesis protein BRX1 homolog GN=BRIX1	BRX1_HUMAN	41.403	0.999	2	2	3	4.37e-05	0.0567	FLVQNIHTLAELK	0.997	36.3	25	36.3	1	0	0	1525.87	141	153
TATA-binding protein-associated factor 172 GN=BTAF1	BTAF1_HUMAN	206.89	1	2	2	3	4.37e-05	0.0141	LFILLDTGTTPVTR	0.997	64.3	25	64.3	1	0	0	1546.88	9	22
TATA-binding protein-associated factor 172 GN=BTAF1	BTAF1_HUMAN	206.89	1	2	2	3	4.37e-05	0.0141	IAAGQAVEAIVK	0.997	63.9	25	59.7	2	0	0	1169.69	60	71
Basic leucine zipper and W2 domain-containing protein 2 GN=BZW2	BZW2_HUMAN	48.164	1	3	3	4	5.83e-05	0.0668	EGIAASFAVK	0.98	23.6	25	23.6	1	0	0	992.541	180	189
Basic leucine zipper and W2 domain-containing protein 2 GN=BZW2	BZW2_HUMAN	48.164	1	3	3	4	5.83e-05	0.0668	LLELFPVNR	0.99	26.9	25	21.8	2	0	0	1100.65	216	224
Basic leucine zipper and W2 domain-containing protein 2 GN=BZW2	BZW2_HUMAN	48.164	1	3	3	4	5.83e-05	0.0668	ELQKELQER	0.975	26.8	25	13.5	1	0	0	1172.63	257	265
C-1-tetrahydrofolate synthase, cytoplasmic GN=MTHFD1	C1TC_HUMAN	101.561	1	7	9	13	0.000189	0.11	APAEILNGKEISAQIR	0.997	61.5	25	61.5	1	2	0	1709.95	2	17
C-1-tetrahydrofolate synthase, cytoplasmic GN=MTHFD1	C1TC_HUMAN	101.561	1	7	9	13	0.000189	0.11	GDLNDCFIPCTPK	0.954	21.1	25	20.5	1	0	0	1536.68	138	150
C-1-tetrahydrofolate synthase, cytoplasmic GN=MTHFD1	C1TC_HUMAN	101.561	1	7	9	13	0.000189	0.11	VVGDVAYDEAKER	0.997	76.9	25	72.4	2	1	0	1450.72	252	264
C-1-tetrahydrofolate synthase, cytoplasmic GN=MTHFD1	C1TC_HUMAN	101.561	1	7	9	13	0.000189	0.11	TPVPSDIDISR	0.997	43.4	25	41.6	2	0	0	1199.63	314	324
C-1-tetrahydrofolate synthase, cytoplasmic GN=MTHFD1	C1TC_HUMAN	101.561	1	7	9	13	0.000189	0.11	VLLSALER	0.997	52.2	25	35.3	2	0	0	900.551	355	362
C-1-tetrahydrofolate synthase, cytoplasmic GN=MTHFD1	C1TC_HUMAN	101.561	1	7	9	13	0.000189	0.11	YVVVTGITPTPLGEGK	0.997	51.7	25	51.7	1	0	0	1630.91	371	386
C-1-tetrahydrofolate synthase, cytoplasmic GN=MTHFD1	C1TC_HUMAN	101.561	1	7	9	13	0.000189	0.11	VLDTNDRFLR	0.988	18.9	25	13.8	1	1	0	1248.67	533	542
C-1-tetrahydrofolate synthase, cytoplasmic GN=MTHFD1	C1TC_HUMAN	101.561	1	7	9	13	0.000189	0.11	YSGLCPHVVVLVATVR	0.997	51.1	25	50.8	0	1	0	1769.97	687	702
Monofunctional C1-tetrahydrofolate synthase, mitochondrial GN=MTHFD1L	C1TM_HUMAN	105.792	1	9	12	22	0.000321	0.0982	AVIELLEK	0.996	29	25	11.8	1	0	0	914.556	206	213
Monofunctional C1-tetrahydrofolate synthase, mitochondrial GN=MTHFD1L	C1TM_HUMAN	105.792	1	9	12	22	0.000321	0.0982	LQPLSPVPSDIEISR	0.997	38	25	36.3	3	0	0	1650.91	353	367
Monofunctional C1-tetrahydrofolate synthase, mitochondrial GN=MTHFD1L	C1TM_HUMAN	105.792	1	9	12	22	0.000321	0.0982	VRLSVLER	0.997	37.1	25	27.4	2	0	0	971.6	398	405
Monofunctional C1-tetrahydrofolate synthase, mitochondrial GN=MTHFD1L	C1TM_HUMAN	105.792	1	9	12	22	0.000321	0.0982	VLDTNDRFLR	0.988	18.9	25	13.8	1	1	0	1248.67	576	585
Monofunctional C1-tetrahydrofolate synthase, mitochondrial GN=MTHFD1L	C1TM_HUMAN	105.792	1	9	12	22	0.000321	0.0982	ASGLVPNVVVLVATVR	0.997	78.7	25	78.7	4	2	0	1593.97	730	745
Monofunctional C1-tetrahydrofolate synthase, mitochondrial GN=MTHFD1L	C1TM_HUMAN	105.792	1	9	12	22	0.000321	0.0982	TIAQAVYGAK	0.997	37.2	25	33	2	0	0	1021.57	871	880
Monofunctional C1-tetrahydrofolate synthase, mitochondrial GN=MTHFD1L	C1TM_HUMAN	105.792	1	9	12	22	0.000321	0.0982	TIAQAVYGAKDIELSPEAQAK	0.997	37.2	25	37.2	0	2	0	2203.16	871	891
Monofunctional C1-tetrahydrofolate synthase, mitochondrial GN=MTHFD1L	C1TM_HUMAN	105.792	1	9	12	22	0.000321	0.0982	DIELSPEAQAK	0.997	42.7	25	32.9	1	0	0	1200.61	881	891
Monofunctional C1-tetrahydrofolate synthase, mitochondrial GN=MTHFD1L	C1TM_HUMAN	105.792	1	9	12	22	0.000321	0.0982	IDRYTQQGFGNLPICMAK	0.997	26.5	25	26.5	0	3	0	2112.04	892	909
Calmodulin-regulated spectrin-associated protein 3 GN=CAMSAP3	CAMP3_HUMAN	134.752	1	5	5	9	0.000131	0.0488	LLLSAELYCR	0.997	53.5	25	53.5	1	0	0	1237.66	77	86
Calmodulin-regulated spectrin-associated protein 3 GN=CAMSAP3	CAMP3_HUMAN	134.752	1	5	5	9	0.000131	0.0488	ASPAAPADGAAPAQPSIR	0.997	54.8	25	54.8	2	0	0	1647.85	192	209
Calmodulin-regulated spectrin-associated protein 3 GN=CAMSAP3	CAMP3_HUMAN	134.752	1	5	5	9	0.000131	0.0488	RSPGPGPSQSPR	0.997	22.2	25	14	0	1	0	1222.63	768	779
Calmodulin-regulated spectrin-associated protein 3 GN=CAMSAP3	CAMP3_HUMAN	134.752	1	5	5	9	0.000131	0.0488	APAEEEVGPR	0.997	57.3	25	48.6	4	0	0	1054.52	964	973
Calmodulin-regulated spectrin-associated protein 3 GN=CAMSAP3	CAMP3_HUMAN	134.752	1	5	5	9	0.000131	0.0488	SGCCDDSALAR	0.997	39.3	25	39.3	1	0	0	1211.48	1020	1030
Cullin-associated NEDD8-dissociated protein 1 GN=CAND1	CAND1_HUMAN	136.381	1	13	15	39	0.000568	0.102	LLEDKNGEVQNLAVK	0.996	25.3	25	16.3	0	1	0	1669.91	56	70
Cullin-associated NEDD8-dissociated protein 1 GN=CAND1	CAND1_HUMAN	136.381	1	13	15	39	0.000568	0.102	CLGPLVSK	0.993	26.3	25	6.99	2	0	0	873.486	71	78
Cullin-associated NEDD8-dissociated protein 1 GN=CAND1	CAND1_HUMAN	136.381	1	13	15	39	0.000568	0.102	TYIQCIAAISR	0.997	72.5	25	65.1	5	0	0	1295.68	233	243
Cullin-associated NEDD8-dissociated protein 1 GN=CAND1	CAND1_HUMAN	136.381	1	13	15	39	0.000568	0.102	TVSPALISR	0.997	30.3	25	19.6	2	0	0	943.557	374	382
Cullin-associated NEDD8-dissociated protein 1 GN=CAND1	CAND1_HUMAN	136.381	1	13	15	39	0.000568	0.102	AADIDQEVKER	0.997	57.9	25	49.1	3	5	0	1273.64	578	588
Cullin-associated NEDD8-dissociated protein 1 GN=CAND1	CAND1_HUMAN	136.381	1	13	15	39	0.000568	0.102	ALTLIAGSPLK	0.997	71.4	25	69.8	4	0	0	1083.68	631	641
Cullin-associated NEDD8-dissociated protein 1 GN=CAND1	CAND1_HUMAN	136.381	1	13	15	39	0.000568	0.102	QSYYSIAK	0.983	23.5	25	11.7	1	0	0	959.483	794	801
Cullin-associated NEDD8-dissociated protein 1 GN=CAND1	CAND1_HUMAN	136.381	1	13	15	39	0.000568	0.102	EGPAVVGQFIQDVK	0.997	51.5	25	51.5	4	0	0	1486.79	813	826
Cullin-associated NEDD8-dissociated protein 1 GN=CAND1	CAND1_HUMAN	136.381	1	13	15	39	0.000568	0.102	EGPAVVGQFIQDVKNSR	0.959	14.9	25	14.5	0	1	0	1843.97	813	829
Cullin-associated NEDD8-dissociated protein 1 GN=CAND1	CAND1_HUMAN	136.381	1	13	15	39	0.000568	0.102	LTLIDPETLLPR	0.997	41.8	25	41.8	3	0	0	1380.81	958	969
Cullin-associated NEDD8-dissociated protein 1 GN=CAND1	CAND1_HUMAN	136.381	1	13	15	39	0.000568	0.102	LKGYLISGSSYAR	0.997	38.5	25	38.4	1	4	0	1414.77	970	982
Cullin-associated NEDD8-dissociated protein 1 GN=CAND1	CAND1_HUMAN	136.381	1	13	15	39	0.000568	0.102	TLEDPDLNVR	0.95	24.5	25	19.4	1	0	0	1171.6	1014	1023
Cullin-associated NEDD8-dissociated protein 1 GN=CAND1	CAND1_HUMAN	136.381	1	13	15	39	0.000568	0.102	TLEDPDLNVRR	0.997	29.8	25	20.7	2	0	0	1327.7	1014	1024
Cullin-associated NEDD8-dissociated protein 2 GN=CAND2	CAND2_HUMAN	135.26	0.998	2	2	3	4.37e-05	0.0283	LLEDKNGEVQNLAVK	0.996	25.3	25	16.3	0	1	0	1669.91	56	70
Cullin-associated NEDD8-dissociated protein 2 GN=CAND2	CAND2_HUMAN	135.26	0.998	2	2	3	4.37e-05	0.0283	VPTSPTAIR	0.995	32.9	25	24.9	1	0	0	941.542	227	235
Cullin-associated NEDD8-dissociated protein 2 GN=CAND2	CAND2_HUMAN	135.26	0.998	2	2	3	4.37e-05	0.0283	TLIQCLGSVGR	0.997	57.4	25	47.4	2	0	0	1203.65	236	246
F-actin-capping protein subunit beta GN=CAPZB	CAPZB_HUMAN	31.3516	1	2	2	4	5.83e-05	0.0866	SGSGTMNLGGSLTR	0.997	57.6	25	48	3	0	0	1353.64	182	195
F-actin-capping protein subunit beta GN=CAPZB	CAPZB_HUMAN	31.3516	1	2	2	4	5.83e-05	0.0866	STLNEIYFGK	0.974	22.1	25	22.1	1	0	0	1171.6	226	235
F-actin-capping protein subunit alpha-1 GN=CAPZA1	CAZA1_HUMAN	32.9232	1	2	2	2	2.92e-05	0.0594	LLLNNDNLLR	0.948	20.1	25	14.7	1	0	0	1197.7	38	47
F-actin-capping protein subunit alpha-1 GN=CAPZA1	CAZA1_HUMAN	32.9232	1	2	2	2	2.92e-05	0.0594	RQLPVTR	0.946	20	25	10.8	1	0	0	869.532	260	266
Carbonyl reductase [NADPH] 1 GN=CBR1	CBR1_HUMAN	30.3748	1	6	7	23	0.000335	0.242	LFSGDVVLTAR	0.997	58.5	25	51.3	4	0	0	1177.66	28	38
Carbonyl reductase [NADPH] 1 GN=CBR1	CBR1_HUMAN	30.3748	1	6	7	23	0.000335	0.242	DVTRGQAAVQQLQAEGLSPR	0.997	45.1	25	42.7	0	2	0	2124.12	39	58
Carbonyl reductase [NADPH] 1 GN=CBR1	CBR1_HUMAN	30.3748	1	6	7	23	0.000335	0.242	GQAAVQQLQAEGLSPR	0.997	85.6	25	81.4	3	0	0	1652.87	43	58
Carbonyl reductase [NADPH] 1 GN=CBR1	CBR1_HUMAN	30.3748	1	6	7	23	0.000335	0.242	EYGGLDVLVNNAGIAFK	0.997	63.1	25	63.1	2	0	0	1779.93	80	96
Carbonyl reductase [NADPH] 1 GN=CBR1	CBR1_HUMAN	30.3748	1	6	7	23	0.000335	0.242	VVNVSSIMSVR	0.997	75.1	25	65.3	8	0	0	1190.66	135	145
Carbonyl reductase [NADPH] 1 GN=CBR1	CBR1_HUMAN	30.3748	1	6	7	23	0.000335	0.242	IGVTVLSR	0.997	60.9	25	0	4	0	0	844.525	199	206
Cystathionine beta-synthase GN=CBS	CBS_HUMAN	60.5873	1	5	5	9	0.000131	0.107	PSETPQAEVGPTGCPHR	0.997	61.1	25	57.1	0	2	0	1819.84	2	18
Cystathionine beta-synthase GN=CBS	CBS_HUMAN	60.5873	1	5	5	9	0.000131	0.107	IGDTPMVR	0.997	42	25	28	2	0	0	904.456	84	91
Cystathionine beta-synthase GN=CBS	CBS_HUMAN	60.5873	1	5	5	9	0.000131	0.107	CEFFNAGGSVKDR	0.963	14.4	25	13.1	0	1	0	1486.67	109	121
Cystathionine beta-synthase GN=CBS	CBS_HUMAN	60.5873	1	5	5	9	0.000131	0.107	SNDEEAFTFAR	0.997	58.3	25	58.3	2	0	0	1286.56	326	336
Cystathionine beta-synthase GN=CBS	CBS_HUMAN	60.5873	1	5	5	9	0.000131	0.107	AAQELQEGQR	0.997	58.6	25	48.3	2	0	0	1129.56	360	369
COBW domain-containing protein 2 GN=CBWD2	CBWD2_HUMAN	44.035	1	3	3	5	7.29e-05	0.109	IPVTIITGYLGAGK	0.961	22.6	25	22.6	1	0	0	1402.83	42	55
COBW domain-containing protein 2 GN=CBWD2	CBWD2_HUMAN	44.035	1	3	3	5	7.29e-05	0.109	VAVILNEFGEGSALEK	0.997	64.5	25	62.4	2	0	0	1675.89	71	86
COBW domain-containing protein 2 GN=CBWD2	CBWD2_HUMAN	44.035	1	3	3	5	7.29e-05	0.109	SINGLGQILETQR	0.997	43.7	25	41.8	2	0	0	1428.78	222	234
Coiled-coil domain-containing protein 47 GN=CCDC47	CCD47_HUMAN	55.8749	1	3	3	4	5.83e-05	0.0621	VCCEGMLIQLR	0.997	51.2	25	50.6	1	0	0	1378.66	213	223
Coiled-coil domain-containing protein 47 GN=CCDC47	CCD47_HUMAN	55.8749	1	3	3	4	5.83e-05	0.0621	RQDLLNVLAR	0.997	37.2	25	33.7	2	0	0	1197.71	227	236
Coiled-coil domain-containing protein 47 GN=CCDC47	CCD47_HUMAN	55.8749	1	3	3	4	5.83e-05	0.0621	ARVEENFLK	0.992	31.1	25	21	1	0	0	1105.6	411	419
Cell division cycle protein 23 homolog GN=CDC23	CDC23_HUMAN	68.8368	1	3	3	4	5.83e-05	0.0469	AYFDVKEYDR	0.997	41.7	25	41.7	2	0	0	1305.61	92	101
Cell division cycle protein 23 homolog GN=CDC23	CDC23_HUMAN	68.8368	1	3	3	4	5.83e-05	0.0469	ALKLNPR	0.994	27.7	25	16.9	1	0	0	811.515	357	363
Cell division cycle protein 23 homolog GN=CDC23	CDC23_HUMAN	68.8368	1	3	3	4	5.83e-05	0.0469	VSPLNLSSVTP	0.951	25.4	25	25.4	1	0	0	1113.62	587	597
Cell division control protein 45 homolog GN=CDC45	CDC45_HUMAN	65.5695	0.998	2	2	3	4.37e-05	0.0389	YVTDVGVLQR	0.997	43	25	28.7	2	0	0	1149.63	238	247
Cell division control protein 45 homolog GN=CDC45	CDC45_HUMAN	65.5695	0.998	2	2	3	4.37e-05	0.0389	AFEKAAESTSSR	0.997	50.5	25	50.5	1	0	0	1283.62	525	536
Cell division cycle 5-like protein GN=CDC5L	CDC5L_HUMAN	92.2542	1	2	2	2	2.92e-05	0.0187	IASLLHR	0.997	34.3	25	29.6	1	0	0	809.499	34	40
Cell division cycle 5-like protein GN=CDC5L	CDC5L_HUMAN	92.2542	1	2	2	2	2.92e-05	0.0187	TIAPIIGR	0.988	24.3	25	24.3	1	0	0	840.53	84	91
Cyclin-dependent kinase 1 GN=CDK1	CDK1_HUMAN	34.0973	1	15	23	61	0.000889	0.444	IGEGTYGVVYK	0.997	87.6	25	40.4	4	0	0	1185.62	10	20
Cyclin-dependent kinase 1 GN=CDK1	CDK1_HUMAN	34.0973	1	15	23	61	0.000889	0.444	IGEGTYGVVYKGR	0.997	67.7	25	26.2	2	2	0	1398.74	10	22
Cyclin-dependent kinase 1 GN=CDK1	CDK1_HUMAN	34.0973	1	15	23	61	0.000889	0.444	HKTTGQVVAMK	0.997	28.8	25	17.1	2	2	0	1199.66	23	33
Cyclin-dependent kinase 1 GN=CDK1	CDK1_HUMAN	34.0973	1	15	23	61	0.000889	0.444	TTGQVVAMKK	0.997	39.1	25	31.7	2	0	0	1062.6	25	34
Cyclin-dependent kinase 1 GN=CDK1	CDK1_HUMAN	34.0973	1	15	23	61	0.000889	0.444	IRLESEEEGVPSTAIR	0.997	49.7	25	39.6	2	2	0	1785.93	35	50
Cyclin-dependent kinase 1 GN=CDK1	CDK1_HUMAN	34.0973	1	15	23	61	0.000889	0.444	LESEEEGVPSTAIR	0.997	45.3	25	42	2	0	0	1516.75	37	50
Cyclin-dependent kinase 1 GN=CDK1	CDK1_HUMAN	34.0973	1	15	23	61	0.000889	0.444	EISLLKELR	0.997	30.8	25	16.1	2	0	0	1100.67	51	59
Cyclin-dependent kinase 1 GN=CDK1	CDK1_HUMAN	34.0973	1	15	23	61	0.000889	0.444	DLKPQNLLIDDKGTIK	0.997	41.3	25	41.3	1	7	0	1811.03	128	143
Cyclin-dependent kinase 1 GN=CDK1	CDK1_HUMAN	34.0973	1	15	23	61	0.000889	0.444	LADFGLAR	0.997	50.3	25	0	6	0	0	862.478	144	151
Cyclin-dependent kinase 1 GN=CDK1	CDK1_HUMAN	34.0973	1	15	23	61	0.000889	0.444	SPEVLLGSAR	0.997	82.7	25	73.1	7	0	0	1028.57	171	180
Cyclin-dependent kinase 1 GN=CDK1	CDK1_HUMAN	34.0973	1	15	23	61	0.000889	0.444	WKPGSLASHVK	0.997	29.1	25	27.2	1	2	0	1209.67	244	254
Cyclin-dependent kinase 1 GN=CDK1	CDK1_HUMAN	34.0973	1	15	23	61	0.000889	0.444	NLDENGLDLLSK	0.997	63.2	25	38.6	5	0	0	1330.69	255	266
Cyclin-dependent kinase 1 GN=CDK1	CDK1_HUMAN	34.0973	1	15	23	61	0.000889	0.444	MLIYDPAK	0.997	34.4	25	26.4	4	0	0	950.502	267	274
Cyclin-dependent kinase 1 GN=CDK1	CDK1_HUMAN	34.0973	1	15	23	61	0.000889	0.444	MLIYDPAKR	0.997	40.5	25	28.2	4	0	0	1122.6	267	275
Cyclin-dependent kinase 1 GN=CDK1	CDK1_HUMAN	34.0973	1	15	23	61	0.000889	0.444	MALNHPYFNDLDNQIK	0.997	30.8	25	28.1	0	2	0	1932.93	280	295
Cyclin-dependent kinase 2 GN=CDK2	CDK2_HUMAN	33.9307	1	6	8	12	0.000175	0.339	IGEGTYGVVYK	0.997	87.6	25	40.4	4	0	0	1185.62	10	20
Cyclin-dependent kinase 2 GN=CDK2	CDK2_HUMAN	33.9307	1	6	8	12	0.000175	0.339	NKLTGEVVALK	0.997	31.4	25	20.4	2	0	0	1171.7	23	33
Cyclin-dependent kinase 2 GN=CDK2	CDK2_HUMAN	33.9307	1	6	8	12	0.000175	0.339	IRLDTETEGVPSTAIR	0.997	39.2	25	28.8	0	1	0	1757.94	35	50
Cyclin-dependent kinase 2 GN=CDK2	CDK2_HUMAN	33.9307	1	6	8	12	0.000175	0.339	ELNHPNIVK	0.997	31.7	25	17.9	1	0	0	1063.59	57	65
Cyclin-dependent kinase 2 GN=CDK2	CDK2_HUMAN	33.9307	1	6	8	12	0.000175	0.339	FMDASALTGIPLPLIK	0.997	65.4	25	64.3	3	0	0	1702.95	90	105
Cyclin-dependent kinase 2 GN=CDK2	CDK2_HUMAN	33.9307	1	6	8	12	0.000175	0.339	DLKPQNLLINTEGAIK	0.997	35	25	33.5	1	2	0	1767	127	142
Cyclin-dependent kinase 2 GN=CDK2	CDK2_HUMAN	33.9307	1	6	8	12	0.000175	0.339	LADFGLAR	0.997	50.3	25	0	6	0	0	862.478	143	150
Cyclin-dependent kinase 2 GN=CDK2	CDK2_HUMAN	33.9307	1	6	8	12	0.000175	0.339	ALFPGDSEIDQLFR	0.997	59.4	25	56.3	2	0	0	1607.81	201	214
Cyclin-dependent kinase 5 GN=CDK5	CDK5_HUMAN	33.3058	0.999	2	2	2	2.92e-05	0.103	IGEGTYGTVFK	0.997	34.7	25	33.3	1	0	0	1171.6	10	20
Cyclin-dependent kinase 5 GN=CDK5	CDK5_HUMAN	33.3058	0.999	2	2	2	2.92e-05	0.103	DLKPQNLLINR	0.978	23.1	25	23.1	1	0	0	1323.77	126	136
Cyclin-dependent kinase 5 GN=CDK5	CDK5_HUMAN	33.3058	0.999	2	2	2	2.92e-05	0.103	LADFGLAR	0.997	50.3	25	0	6	0	0	862.478	142	149
Cat eye syndrome critical region protein 5 GN=CECR5	CECR5_HUMAN	46.3216	1	3	4	8	0.000117	0.078	LVNSQGQLR	0.971	23.9	25	19	1	0	0	1014.57	74	82
Cat eye syndrome critical region protein 5 GN=CECR5	CECR5_HUMAN	46.3216	1	3	4	8	0.000117	0.078	NVVTVDELR	0.983	24.5	25	6.92	1	0	0	1044.57	153	161
Cat eye syndrome critical region protein 5 GN=CECR5	CECR5_HUMAN	46.3216	1	3	4	8	0.000117	0.078	ATHDGAPELGAGGTR	0.997	35.9	25	24.4	2	4	0	1409.68	332	346
Centromere protein V GN=CENPV	CENPV_HUMAN	29.9462	1	6	9	20	0.000292	0.338	SGASGASAAPAASAAAALAPSATR	0.997	51.8	25	51.8	2	1	0	1985	18	41
Centromere protein V GN=CENPV	CENPV_HUMAN	29.9462	1	6	9	20	0.000292	0.338	SQAVEKPPSEKPR	0.997	40.6	25	40.6	2	3	0	1452.78	53	65
Centromere protein V GN=CENPV	CENPV_HUMAN	29.9462	1	6	9	20	0.000292	0.338	LLLDTFEYQGLVK	0.997	88.1	25	78.7	4	0	0	1538.85	135	147
Centromere protein V GN=CENPV	CENPV_HUMAN	29.9462	1	6	9	20	0.000292	0.338	GAEHITTYTFNTHK	0.997	42.4	25	38.3	0	2	0	1619.78	197	210
Centromere protein V GN=CENPV	CENPV_HUMAN	29.9462	1	6	9	20	0.000292	0.338	CGVQSFYTPR	0.997	61.2	25	61.2	2	0	0	1214.56	219	228
Centromere protein V GN=CENPV	CENPV_HUMAN	29.9462	1	6	9	20	0.000292	0.338	SNPGGFGIAPHCLDEGTVR	0.997	61.1	25	59.2	2	2	0	1983.93	229	247
Centrosomal protein of 70 kDa GN=CEP70	CEP70_HUMAN	69.7532	0.998	2	2	2	2.92e-05	0.0285	APVIIYKQTK	0.997	34.6	25	34.6	1	0	0	1160.7	364	373
Centrosomal protein of 70 kDa GN=CEP70	CEP70_HUMAN	69.7532	0.998	2	2	2	2.92e-05	0.0285	MNEVYTR	0.992	29.7	25	29.7	1	0	0	912.424	489	495
UPF0488 protein C8orf33 GN=C8orf33	CH033_HUMAN	24.9928	1	2	2	4	5.83e-05	0.114	QKEQAIGAIR	0.997	30.9	25	19.4	2	0	0	1113.64	134	143
UPF0488 protein C8orf33 GN=C8orf33	CH033_HUMAN	24.9928	1	2	2	4	5.83e-05	0.114	AAAYSAQVQPVDGATR	0.997	47	25	40.3	2	0	0	1604.8	183	198
60 kDa heat shock protein, mitochondrial GN=HSPD1	CH60_HUMAN	61.0557	1	18	22	39	0.000568	0.353	TVIIEQSWGSPK	0.997	63	25	54.5	2	0	0	1344.72	61	72
60 kDa heat shock protein, mitochondrial GN=HSPD1	CH60_HUMAN	61.0557	1	18	22	39	0.000568	0.353	VTKDGVTVAK	0.997	51.7	25	35.5	2	0	0	1017.59	73	82
60 kDa heat shock protein, mitochondrial GN=HSPD1	CH60_HUMAN	61.0557	1	18	22	39	0.000568	0.353	LVQDVANNTNEEAGDGTTTATVLAR	0.997	48.7	25	48.7	0	2	0	2560.25	97	121
60 kDa heat shock protein, mitochondrial GN=HSPD1	CH60_HUMAN	61.0557	1	18	22	39	0.000568	0.353	SIAKEGFEK	0.997	36.4	25	29.4	1	0	0	1008.54	122	130
60 kDa heat shock protein, mitochondrial GN=HSPD1	CH60_HUMAN	61.0557	1	18	22	39	0.000568	0.353	GANPVEIRR	0.997	37.6	25	33.2	2	0	0	1011.57	134	142
60 kDa heat shock protein, mitochondrial GN=HSPD1	CH60_HUMAN	61.0557	1	18	22	39	0.000568	0.353	GYISPYFINTSK	0.997	48.7	25	44	2	0	0	1389.7	222	233
60 kDa heat shock protein, mitochondrial GN=HSPD1	CH60_HUMAN	61.0557	1	18	22	39	0.000568	0.353	GYISPYFINTSKGQK	0.997	75.8	25	75.8	1	0	0	1702.88	222	236
60 kDa heat shock protein, mitochondrial GN=HSPD1	CH60_HUMAN	61.0557	1	18	22	39	0.000568	0.353	ISSIQSIVPALEIANAHR	0.997	27.9	25	27.9	0	2	0	1919.07	251	268
60 kDa heat shock protein, mitochondrial GN=HSPD1	CH60_HUMAN	61.0557	1	18	22	39	0.000568	0.353	VGLQVVAVK	0.997	73.3	25	73.3	2	0	0	912.588	293	301
60 kDa heat shock protein, mitochondrial GN=HSPD1	CH60_HUMAN	61.0557	1	18	22	39	0.000568	0.353	VGEVIVTK	0.987	32.7	25	29.3	2	0	0	844.514	345	352
60 kDa heat shock protein, mitochondrial GN=HSPD1	CH60_HUMAN	61.0557	1	18	22	39	0.000568	0.353	VGEVIVTKDDAMLLK	0.997	55.1	25	54.6	4	3	0	1630.91	345	359
60 kDa heat shock protein, mitochondrial GN=HSPD1	CH60_HUMAN	61.0557	1	18	22	39	0.000568	0.353	LSDGVAVLK	0.952	27	25	13.5	1	0	0	901.535	397	405
60 kDa heat shock protein, mitochondrial GN=HSPD1	CH60_HUMAN	61.0557	1	18	22	39	0.000568	0.353	VGGTSDVEVNEK	0.997	30.1	25	30.1	1	0	0	1233.6	406	417
60 kDa heat shock protein, mitochondrial GN=HSPD1	CH60_HUMAN	61.0557	1	18	22	39	0.000568	0.353	VTDALNATR	0.997	72.9	25	55.8	2	0	0	960.511	421	429
60 kDa heat shock protein, mitochondrial GN=HSPD1	CH60_HUMAN	61.0557	1	18	22	39	0.000568	0.353	AAVEEGIVLGGGCALLR	0.997	74.5	25	73.2	4	1	0	1684.91	430	446
60 kDa heat shock protein, mitochondrial GN=HSPD1	CH60_HUMAN	61.0557	1	18	22	39	0.000568	0.353	TLKIPAMTIAK	0.996	21.8	25	11.7	0	1	0	1202.72	471	481
60 kDa heat shock protein, mitochondrial GN=HSPD1	CH60_HUMAN	61.0557	1	18	22	39	0.000568	0.353	NAGVEGSLIVEK	0.997	67.4	25	57.1	2	0	0	1215.66	482	493
60 kDa heat shock protein, mitochondrial GN=HSPD1	CH60_HUMAN	61.0557	1	18	22	39	0.000568	0.353	GIIDPTKVVR	0.997	41.2	25	38.2	2	0	0	1097.67	517	526
Chromodomain-helicase-DNA-binding protein 1-like GN=CHD1L	CHD1L_HUMAN	100.988	1	4	4	7	0.000102	0.0535	GGQAPGFLLR	0.976	24.5	25	8.39	2	0	0	1015.57	10	19
Chromodomain-helicase-DNA-binding protein 1-like GN=CHD1L	CHD1L_HUMAN	100.988	1	4	4	7	0.000102	0.0535	FAPGLSCVTYAGDKEER	0.992	19.5	25	17.5	0	1	0	1899.89	117	133
Chromodomain-helicase-DNA-binding protein 1-like GN=CHD1L	CHD1L_HUMAN	100.988	1	4	4	7	0.000102	0.0535	GGLFTALEKR	0.997	47.4	25	47.4	2	0	0	1091.62	749	758
Chromodomain-helicase-DNA-binding protein 1-like GN=CHD1L	CHD1L_HUMAN	100.988	1	4	4	7	0.000102	0.0535	GIPTYIYYFPR	0.997	46.1	25	46.1	2	0	0	1389.72	867	877
Charged multivesicular body protein 4b GN=CHMP4B	CHM4B_HUMAN	24.9512	1	3	3	5	7.29e-05	0.0982	AGKGGPTPQEAIQR	0.997	31.7	25	30	0	1	0	1409.75	15	28
Charged multivesicular body protein 4b GN=CHMP4B	CHM4B_HUMAN	24.9512	1	3	3	5	7.29e-05	0.0982	GGPTPQEAIQR	0.997	52.8	25	41.7	2	0	0	1153.6	18	28
Charged multivesicular body protein 4b GN=CHMP4B	CHM4B_HUMAN	24.9512	1	3	3	5	7.29e-05	0.0982	AALQALKR	0.997	32.5	25	12.3	2	0	0	870.552	64	71
Chromatin target of PRMT1 protein GN=CHTOP	CHTOP_HUMAN	26.3978	1	5	9	25	0.000364	0.246	NKQPTPVNIR	0.987	24.6	25	21.4	4	0	0	1166.66	29	38
Chromatin target of PRMT1 protein GN=CHTOP	CHTOP_HUMAN	26.3978	1	5	9	25	0.000364	0.246	ASMQQQQQLASAR	0.997	79.8	25	68.3	9	0	0	1462.71	39	51
Chromatin target of PRMT1 protein GN=CHTOP	CHTOP_HUMAN	26.3978	1	5	9	25	0.000364	0.246	LAQQMENRPSVQAALK	0.997	31.7	25	31.7	1	5	0	1783.95	55	70
Chromatin target of PRMT1 protein GN=CHTOP	CHTOP_HUMAN	26.3978	1	5	9	25	0.000364	0.246	LGKSNIQAR	0.997	42.9	25	40.7	2	0	0	986.574	79	87
Chromatin target of PRMT1 protein GN=CHTOP	CHTOP_HUMAN	26.3978	1	5	9	25	0.000364	0.246	EQLDNQLDAYMSK	0.997	76.6	25	76.6	4	0	0	1570.71	214	226
Probable cytosolic iron-sulfur protein assembly protein CIAO1 GN=CIAO1	CIAO1_HUMAN	37.8389	1	3	3	5	7.29e-05	0.106	SVLSEGHQR	0.984	24	25	17	2	0	0	1012.52	54	62
Probable cytosolic iron-sulfur protein assembly protein CIAO1 GN=CIAO1	CIAO1_HUMAN	37.8389	1	3	3	5	7.29e-05	0.106	SVAWAPSGNLLATCSR	0.997	47.6	25	47.3	1	0	0	1689.84	110	125
Probable cytosolic iron-sulfur protein assembly protein CIAO1 GN=CIAO1	CIAO1_HUMAN	37.8389	1	3	3	5	7.29e-05	0.106	LASCSDDRTVR	0.994	20.3	25	20.3	0	2	0	1279.61	209	219
Cytoskeleton-associated protein 5 GN=CKAP5	CKAP5_HUMAN	225.502	1	5	5	9	0.000131	0.0295	TTGEVVSGVVSK	0.997	47.4	25	30.5	4	0	0	1162.63	85	96
Cytoskeleton-associated protein 5 GN=CKAP5	CKAP5_HUMAN	225.502	1	5	5	9	0.000131	0.0295	LEAGDYADLVK	0.987	24.6	25	12.5	1	0	0	1193.61	312	322
Cytoskeleton-associated protein 5 GN=CKAP5	CKAP5_HUMAN	225.502	1	5	5	9	0.000131	0.0295	TALAATNPAVR	0.965	26	25	24.7	1	0	0	1084.61	762	772
Cytoskeleton-associated protein 5 GN=CKAP5	CKAP5_HUMAN	225.502	1	5	5	9	0.000131	0.0295	TEISDKITSELVSK	0.997	56.9	25	56.9	1	0	0	1549.83	855	868
Cytoskeleton-associated protein 5 GN=CKAP5	CKAP5_HUMAN	225.502	1	5	5	9	0.000131	0.0295	AQNISSNANMLR	0.997	50.6	25	50.6	2	0	0	1318.65	1442	1453
Chloride channel CLIC-like protein 1 GN=CLCC1	CLCC1_HUMAN	62.0245	1	2	2	3	4.37e-05	0.0436	ETLLEIQK	0.997	38.8	25	25.4	1	0	0	973.557	132	139
Chloride channel CLIC-like protein 1 GN=CLCC1	CLCC1_HUMAN	62.0245	1	2	2	3	4.37e-05	0.0436	GVAGPRGQDPVSSPCG	0.997	40.5	25	23.2	2	0	0	1540.72	536	551
Clathrin heavy chain 1 GN=CLTC	CLH1_HUMAN	191.619	1	8	8	18	0.000262	0.0639	NNLAGAEELFAR	0.997	72.6	25	68.8	2	0	0	1304.66	355	366
Clathrin heavy chain 1 GN=CLTC	CLH1_HUMAN	191.619	1	8	8	18	0.000262	0.0639	KFNALFAQGNYSEAAK	0.997	31.7	25	29	0	1	0	1758.88	367	382
Clathrin heavy chain 1 GN=CLTC	CLH1_HUMAN	191.619	1	8	8	18	0.000262	0.0639	SVDPTLALSVYLR	0.997	79.6	25	79.6	3	0	0	1433.8	469	481
Clathrin heavy chain 1 GN=CLTC	CLH1_HUMAN	191.619	1	8	8	18	0.000262	0.0639	ALEHFTDLYDIKR	0.997	47.9	25	47.9	0	2	0	1620.84	626	638
Clathrin heavy chain 1 GN=CLTC	CLH1_HUMAN	191.619	1	8	8	18	0.000262	0.0639	IYIDSNNNPER	0.997	40.4	25	31.7	2	0	0	1334.63	882	892
Clathrin heavy chain 1 GN=CLTC	CLH1_HUMAN	191.619	1	8	8	18	0.000262	0.0639	LLYNNVSNFGR	0.997	52.7	25	52.7	2	0	0	1296.67	1216	1226
Clathrin heavy chain 1 GN=CLTC	CLH1_HUMAN	191.619	1	8	8	18	0.000262	0.0639	LASTLVHLGEYQAAVDGAR	0.997	34.1	25	34.1	0	4	0	1971.03	1227	1245
Clathrin heavy chain 1 GN=CLTC	CLH1_HUMAN	191.619	1	8	8	18	0.000262	0.0639	VKQLPLVKPYLR	0.997	30.2	25	30.2	0	2	0	1453.93	1442	1453
ATP-dependent Clp protease ATP-binding subunit clpX-like, mitochondrial GN=CLPX	CLPX_HUMAN	69.2247	1	8	8	14	0.000204	0.161	SIIKEPESAAEAVK	0.997	34.9	25	30	1	0	0	1471.8	145	158
ATP-dependent Clp protease ATP-binding subunit clpX-like, mitochondrial GN=CLPX	CLPX_HUMAN	69.2247	1	8	8	14	0.000204	0.161	GGEVLDSSHDDIKLEK	0.997	24	25	16	0	1	0	1741.86	271	286
ATP-dependent Clp protease ATP-binding subunit clpX-like, mitochondrial GN=CLPX	CLPX_HUMAN	69.2247	1	8	8	14	0.000204	0.161	SNILLLGPTGSGK	0.997	85.9	25	84.3	2	0	0	1256.72	287	299
ATP-dependent Clp protease ATP-binding subunit clpX-like, mitochondrial GN=CLPX	CLPX_HUMAN	69.2247	1	8	8	14	0.000204	0.161	TLLAQTLAK	0.997	35.7	25	26.1	2	0	0	958.593	300	308
ATP-dependent Clp protease ATP-binding subunit clpX-like, mitochondrial GN=CLPX	CLPX_HUMAN	69.2247	1	8	8	14	0.000204	0.161	DVGGEGVQQGLLK	0.996	38	25	38	2	0	0	1299.69	374	386
ATP-dependent Clp protease ATP-binding subunit clpX-like, mitochondrial GN=CLPX	CLPX_HUMAN	69.2247	1	8	8	14	0.000204	0.161	LLEGTIVNVPEKNSR	0.997	26.3	25	26.3	0	2	0	1668.93	387	401
ATP-dependent Clp protease ATP-binding subunit clpX-like, mitochondrial GN=CLPX	CLPX_HUMAN	69.2247	1	8	8	14	0.000204	0.161	YLGFGTPSNLGK	0.997	43.2	25	37.6	2	0	0	1253.65	438	449
ATP-dependent Clp protease ATP-binding subunit clpX-like, mitochondrial GN=CLPX	CLPX_HUMAN	69.2247	1	8	8	14	0.000204	0.161	AAAAADLANR	0.997	60.3	25	55.2	2	0	0	943.495	453	462
Calcium-binding mitochondrial carrier protein Aralar1 GN=SLC25A12	CMC1_HUMAN	74.764	0.998	2	3	4	5.83e-05	0.125	IAPLAEGALPYNLAELQR	0.997	42.6	25	42.2	2	1	0	1939.06	292	309
Calcium-binding mitochondrial carrier protein Aralar1 GN=SLC25A12	CMC1_HUMAN	74.764	0.998	2	3	4	5.83e-05	0.125	VLRYEGFFGLYR	0.989	19.3	25	19.1	0	1	0	1519.81	379	390
Calcium-binding mitochondrial carrier protein Aralar1 GN=SLC25A12	CMC1_HUMAN	74.764	0.998	2	3	4	5.83e-05	0.125	YEGFFGLYR	0.997	48.4	25	46	2	0	0	1151.55	382	390
Calcium-binding mitochondrial carrier protein Aralar1 GN=SLC25A12	CMC1_HUMAN	74.764	0.998	2	3	4	5.83e-05	0.125	GLIPQLIGVAPEK	0.997	72.1	25	0	2	0	0	1334.8	391	403
Calcium-binding mitochondrial carrier protein Aralar1 GN=SLC25A12	CMC1_HUMAN	74.764	0.998	2	3	4	5.83e-05	0.125	AIKLTVNDFVR	0.997	31	25	31	2	2	0	1275.74	404	414
Calcium-binding mitochondrial carrier protein Aralar1 GN=SLC25A12	CMC1_HUMAN	74.764	0.998	2	3	4	5.83e-05	0.125	LTVNDFVR	0.997	55.5	25	49.7	2	0	0	963.526	407	414
Calcium-binding mitochondrial carrier protein Aralar1 GN=SLC25A12	CMC1_HUMAN	74.764	0.998	2	3	4	5.83e-05	0.125	VSALNVLR	0.997	46.4	25	33.5	1	0	0	871.536	466	473
Calcium-binding mitochondrial carrier protein Aralar1 GN=SLC25A12	CMC1_HUMAN	74.764	0.998	2	3	4	5.83e-05	0.125	TRLQVAAR	0.997	34.5	25	9.96	2	0	0	914.553	544	551
Calcium-binding mitochondrial carrier protein Aralar1 GN=SLC25A12	CMC1_HUMAN	74.764	0.998	2	3	4	5.83e-05	0.125	AGQTTYSGVIDCFR	0.997	73	25	73	2	0	0	1574.73	552	565
Calcium-binding mitochondrial carrier protein Aralar1 GN=SLC25A12	CMC1_HUMAN	74.764	0.998	2	3	4	5.83e-05	0.125	AGQTTYSGVIDCFRK	0.997	65.3	25	65.3	2	0	0	1702.82	552	566
Calcium-binding mitochondrial carrier protein Aralar2 GN=SLC25A13	CMC2_HUMAN	74.1772	1	21	24	42	0.000612	0.31	YLNIFGESQPNPK	0.997	71.6	25	70.8	2	0	0	1506.76	44	56
Calcium-binding mitochondrial carrier protein Aralar2 GN=SLC25A13	CMC2_HUMAN	74.1772	1	21	24	42	0.000612	0.31	TVELLSGVVDQTK	0.997	53.5	25	43	1	0	0	1388.76	57	69
Calcium-binding mitochondrial carrier protein Aralar2 GN=SLC25A13	CMC2_HUMAN	74.1772	1	21	24	42	0.000612	0.31	DVEVTKEEFVLAAQK	0.997	44.2	25	44.2	1	2	0	1705.9	246	260
Calcium-binding mitochondrial carrier protein Aralar2 GN=SLC25A13	CMC2_HUMAN	74.1772	1	21	24	42	0.000612	0.31	MTLADIER	0.997	41.8	25	32.3	2	0	0	948.482	285	292
Calcium-binding mitochondrial carrier protein Aralar2 GN=SLC25A13	CMC2_HUMAN	74.1772	1	21	24	42	0.000612	0.31	IAPLEEGTLPFNLAEAQR	0.997	57.7	25	57.7	2	1	0	1969.04	293	310
Calcium-binding mitochondrial carrier protein Aralar2 GN=SLC25A13	CMC2_HUMAN	74.1772	1	21	24	42	0.000612	0.31	IAPLEEGTLPFNLAEAQRQK	0.989	18.4	25	18.4	0	1	0	2225.19	293	312
Calcium-binding mitochondrial carrier protein Aralar2 GN=SLC25A13	CMC2_HUMAN	74.1772	1	21	24	42	0.000612	0.31	ASGDSARPVLLQVAESAYR	0.997	60.2	25	60.2	0	2	0	1990.04	313	331
Calcium-binding mitochondrial carrier protein Aralar2 GN=SLC25A13	CMC2_HUMAN	74.1772	1	21	24	42	0.000612	0.31	FGLGSVAGAVGATAVYPIDLVK	0.956	23.2	25	23.2	1	0	0	2105.16	332	353
Calcium-binding mitochondrial carrier protein Aralar2 GN=SLC25A13	CMC2_HUMAN	74.1772	1	21	24	42	0.000612	0.31	STGSFVGELMYK	0.997	53.7	25	46.6	2	0	0	1318.63	361	372
Calcium-binding mitochondrial carrier protein Aralar2 GN=SLC25A13	CMC2_HUMAN	74.1772	1	21	24	42	0.000612	0.31	VLRYEGFFGLYR	0.989	19.3	25	19.1	0	1	0	1519.81	381	392
Calcium-binding mitochondrial carrier protein Aralar2 GN=SLC25A13	CMC2_HUMAN	74.1772	1	21	24	42	0.000612	0.31	YEGFFGLYR	0.997	48.4	25	46	2	0	0	1151.55	384	392
Calcium-binding mitochondrial carrier protein Aralar2 GN=SLC25A13	CMC2_HUMAN	74.1772	1	21	24	42	0.000612	0.31	GLLPQLLGVAPEK	0.997	72.1	25	0	2	0	0	1334.8	393	405
Calcium-binding mitochondrial carrier protein Aralar2 GN=SLC25A13	CMC2_HUMAN	74.1772	1	21	24	42	0.000612	0.31	AIKLTVNDFVR	0.997	31	25	31	2	2	0	1275.74	406	416
Calcium-binding mitochondrial carrier protein Aralar2 GN=SLC25A13	CMC2_HUMAN	74.1772	1	21	24	42	0.000612	0.31	LTVNDFVR	0.997	55.5	25	49.7	2	0	0	963.526	409	416
Calcium-binding mitochondrial carrier protein Aralar2 GN=SLC25A13	CMC2_HUMAN	74.1772	1	21	24	42	0.000612	0.31	VSALSVVR	0.997	51	25	42.1	2	0	0	830.509	468	475
Calcium-binding mitochondrial carrier protein Aralar2 GN=SLC25A13	CMC2_HUMAN	74.1772	1	21	24	42	0.000612	0.31	DLGFFGIYK	0.991	27.3	25	21.3	2	0	0	1059.55	476	484
Calcium-binding mitochondrial carrier protein Aralar2 GN=SLC25A13	CMC2_HUMAN	74.1772	1	21	24	42	0.000612	0.31	DLGFFGIYKGAK	0.997	45.1	25	39.7	2	0	0	1315.7	476	487
Calcium-binding mitochondrial carrier protein Aralar2 GN=SLC25A13	CMC2_HUMAN	74.1772	1	21	24	42	0.000612	0.31	TRLQVAAR	0.997	34.5	25	9.96	2	0	0	914.553	546	553
Calcium-binding mitochondrial carrier protein Aralar2 GN=SLC25A13	CMC2_HUMAN	74.1772	1	21	24	42	0.000612	0.31	AGQTTYSGVIDCFR	0.997	73	25	73	2	0	0	1574.73	554	567
Calcium-binding mitochondrial carrier protein Aralar2 GN=SLC25A13	CMC2_HUMAN	74.1772	1	21	24	42	0.000612	0.31	AGQTTYSGVIDCFRK	0.997	65.3	25	65.3	2	0	0	1702.82	554	568
Calcium-binding mitochondrial carrier protein Aralar2 GN=SLC25A13	CMC2_HUMAN	74.1772	1	21	24	42	0.000612	0.31	ILREEGPK	0.997	37.9	25	32.6	2	0	0	941.542	569	576
Protein CMSS1 GN=CMSS1	CMS1_HUMAN	31.8854	1	4	4	8	0.000117	0.125	SEPKPGLPEDLQK	0.997	34.4	25	26.9	2	0	0	1437.76	85	97
Protein CMSS1 GN=CMSS1	CMS1_HUMAN	31.8854	1	4	4	8	0.000117	0.125	RVVHLGVGTPGR	0.997	33.7	25	33.7	0	3	0	1247.73	204	215
Protein CMSS1 GN=CMSS1	CMS1_HUMAN	31.8854	1	4	4	8	0.000117	0.125	VVHLGVGTPGR	0.997	50.2	25	50.2	1	0	0	1091.63	205	215
Protein CMSS1 GN=CMSS1	CMS1_HUMAN	31.8854	1	4	4	8	0.000117	0.125	QGGLNLSPLK	0.997	40.4	25	33.5	2	0	0	1026.59	222	231
2',3'-cyclic-nucleotide 3'-phosphodiesterase GN=CNP	CN37_HUMAN	47.5806	1	7	7	10	0.000146	0.197	MVSADAYKITPGAR	0.965	15.2	25	15.2	0	1	0	1495.76	80	93
2',3'-cyclic-nucleotide 3'-phosphodiesterase GN=CNP	CN37_HUMAN	47.5806	1	7	7	10	0.000146	0.197	AGQVFLEELGNHK	0.997	52.5	25	48.1	2	0	0	1441.74	205	217
2',3'-cyclic-nucleotide 3'-phosphodiesterase GN=CNP	CN37_HUMAN	47.5806	1	7	7	10	0.000146	0.197	QFVPGDEPREK	0.995	31	25	21.4	1	0	0	1301.65	225	235
2',3'-cyclic-nucleotide 3'-phosphodiesterase GN=CNP	CN37_HUMAN	47.5806	1	7	7	10	0.000146	0.197	RPPGVLHCTTK	0.996	20.6	25	16.6	0	1	0	1265.68	245	255
2',3'-cyclic-nucleotide 3'-phosphodiesterase GN=CNP	CN37_HUMAN	47.5806	1	7	7	10	0.000146	0.197	APGAEEYAQQDVLKK	0.997	32.7	25	32.5	0	2	0	1646.84	262	276
2',3'-cyclic-nucleotide 3'-phosphodiesterase GN=CNP	CN37_HUMAN	47.5806	1	7	7	10	0.000146	0.197	GKLYSLGNGR	0.992	30.2	25	24.7	1	0	0	1064.58	370	379
2',3'-cyclic-nucleotide 3'-phosphodiesterase GN=CNP	CN37_HUMAN	47.5806	1	7	7	10	0.000146	0.197	AIFTGYYGK	0.997	36.7	25	25.9	2	0	0	1019.52	392	400
Condensin complex subunit 2 GN=NCAPH	CND2_HUMAN	82.5651	1	2	2	2	2.92e-05	0.0189	SRVFDLQFSTDSPR	0.99	18.6	25	18.6	0	1	0	1654.82	70	83
Condensin complex subunit 2 GN=NCAPH	CND2_HUMAN	82.5651	1	2	2	2	2.92e-05	0.0189	VFDLQFSTDSPR	0.997	70.8	25	70.8	1	0	0	1411.69	72	83
Condensin complex subunit 3 GN=NCAPG	CND3_HUMAN	114.338	0.998	2	2	4	5.83e-05	0.0197	IQAVLALSR	0.997	50.2	25	35.6	2	0	0	970.604	160	168
Condensin complex subunit 3 GN=NCAPG	CND3_HUMAN	114.338	0.998	2	2	4	5.83e-05	0.0197	AVLSCIAPSAK	0.997	40.6	25	31.4	2	0	0	1116.61	198	208
Condensin-2 complex subunit D3 GN=NCAPD3	CNDD3_HUMAN	168.894	0.998	2	2	2	2.92e-05	0.0194	NSSAFSYQR	0.997	45.4	25	42.2	1	0	0	1059.49	506	514
Condensin-2 complex subunit D3 GN=NCAPD3	CNDD3_HUMAN	168.894	0.998	2	2	2	2.92e-05	0.0194	ASAGHVAVSSPTPETGPLQR	0.997	29.3	25	29.3	0	1	0	1962	1320	1339
CCR4-NOT transcription complex subunit 1 GN=CNOT1	CNOT1_HUMAN	266.945	1	3	3	8	0.000117	0.0126	LAEVGQYEQVK	0.997	35.2	25	35.2	3	0	0	1263.66	460	470
CCR4-NOT transcription complex subunit 1 GN=CNOT1	CNOT1_HUMAN	266.945	1	3	3	8	0.000117	0.0126	NLDEQLSAPK	0.997	38.4	25	38.4	4	0	0	1114.57	1311	1320
CCR4-NOT transcription complex subunit 1 GN=CNOT1	CNOT1_HUMAN	266.945	1	3	3	8	0.000117	0.0126	NLILSAFPR	0.997	37.9	25	32.4	1	0	0	1030.6	2130	2138
Conserved oligomeric Golgi complex subunit 1 GN=COG1	COG1_HUMAN	108.981	1	3	3	5	7.29e-05	0.0357	QALTDFLLAR	0.992	26.4	25	24.7	2	0	0	1147.65	225	234
Conserved oligomeric Golgi complex subunit 1 GN=COG1	COG1_HUMAN	108.981	1	3	3	5	7.29e-05	0.0357	HIVDCIR	0.994	27.3	25	8.88	1	0	0	912.472	580	586
Conserved oligomeric Golgi complex subunit 1 GN=COG1	COG1_HUMAN	108.981	1	3	3	5	7.29e-05	0.0357	TSVLFGLVTGTENQLAPR	0.997	47.1	25	47.1	2	0	0	1903.03	872	889
Coatomer subunit alpha GN=COPA	COPA_HUMAN	138.349	1	9	9	17	0.000248	0.085	NLSPGAVESDVR	0.949	19.1	25	9.24	1	0	0	1243.63	171	182
Coatomer subunit alpha GN=COPA	COPA_HUMAN	138.349	1	9	9	17	0.000248	0.085	GITGVDLFGTTDAVVK	0.997	39.9	25	39.9	2	0	0	1592.85	183	198
Coatomer subunit alpha GN=COPA	COPA_HUMAN	138.349	1	9	9	17	0.000248	0.085	ASNLENSTYDLYTIPK	0.987	24.1	25	24.1	1	0	0	1828.9	383	398
Coatomer subunit alpha GN=COPA	COPA_HUMAN	138.349	1	9	9	17	0.000248	0.085	SSGLTAVWVAR	0.997	59.5	25	29.7	2	0	0	1146.63	413	423
Coatomer subunit alpha GN=COPA	COPA_HUMAN	138.349	1	9	9	17	0.000248	0.085	TLDLPIYVTR	0.997	45.9	25	43.4	4	0	0	1190.68	563	572
Coatomer subunit alpha GN=COPA	COPA_HUMAN	138.349	1	9	9	17	0.000248	0.085	VLTIDPTEFKFK	0.989	24.7	25	24.7	1	0	0	1437.8	589	600
Coatomer subunit alpha GN=COPA	COPA_HUMAN	138.349	1	9	9	17	0.000248	0.085	GFFEGTIASK	0.997	46.6	25	46.6	3	0	0	1056.54	816	825
Coatomer subunit alpha GN=COPA	COPA_HUMAN	138.349	1	9	9	17	0.000248	0.085	GFFEGTIASKGK	0.997	35.9	25	35.9	1	0	0	1241.65	816	827
Coatomer subunit alpha GN=COPA	COPA_HUMAN	138.349	1	9	9	17	0.000248	0.085	LLELGPKPEVAQQTR	0.997	36.1	25	35.8	0	2	0	1678.95	1128	1142
[truncated: 5,106 more rows]

## Sheet: Table S1-3
Supplemental Table S1-3. List of proteins identified in immunoprecipitation product of vector control (Replicate 3)
[truncated: 4,067 more rows]

[truncated: 3 more sheets: Table S1-4, Table S1-5, Table S1-6]
