# Supplementary material for: Interactome Profiling of N-Terminus-Truncated NS1 Protein of Influenza A Virus Reveals Role of 14-3-3γ in Virus Replication
Source: Pathogens. 2022 Jun 27;11(7):733. doi: 10.3390/pathogens11070733 (PMC9321973; doi:10.3390/pathogens11070733)
Supplement: Supplementary file 1 [file pathogens-11-00733-s001.zip › Supplemental Table S2.xlsx]

## Sheet: Table S2
Supplemental Table S2. Spectral counting-based identification of proteins co-immunoprecipitating with N terminus-truncated NS1 protein
Protein name	Gene name	Accession number	Spectral counts (SCs)							Ratio of tNS179-230/VCa
			Vector control (VC)				tNS179-230
			Rep 1	Rep 2	Rep 3		Rep 1	Rep 2	Rep 3
Filaggrin	FLG	FILA_HUMAN	0	0	0		46	32	0	28.6337
Filaggrin-2	FLG2	FILA2_HUMAN	0	0	0		34	27	0	22.3669
Prelamin-A/C	LMNA	LMNA_HUMAN	0	0	0		22	24	0	16.7668
Calmodulin-like protein 5	CALML5	CALL5_HUMAN	0	0	0		21	24	0	16.3835
Inosine-5'-monophosphate dehydrogenase 2	IMPDH2	IMDH2_HUMAN	0	0	0		18	13	11	15.6778
14-3-3 protein gamma	YWHAG	1433G_HUMAN	0	0	0		13	14	14	15.3065
Desmoglein-1	DSG1	DSG1_HUMAN	0	0	0		18	22	0	14.5668
Galectin-7	LGALS7	LEG7_HUMAN	0	0	0		21	18	0	14.3835
Keratinocyte proline-rich protein	KPRP	KPRP_HUMAN	0	0	0		8	9	17	12.9352
14-3-3 protein sigma	SFN	1433S_HUMAN	0	0	0		15	20	0	12.7501
Neuroblast differentiation-associated protein AHNAK	AHNAK	AHNK_HUMAN	0	0	0		13	20	0	11.9834
Involucrin	IVL	INVO_HUMAN	0	0	0		15	16	0	11.4168
Envoplakin	EVPL	EVPL_HUMAN	0	0	0		13	17	0	10.9834
Periplakin	PPL	PEPL_HUMAN	0	0	0		12	17	0	10.6001
Histone H2B type 1-C/E/F/G/I	HIST1H2BC	H2B1C_HUMAN	0	0	0		12	12	4	10.2162
Histone H2A type 1-D	HIST1H2AD	H2A1D_HUMAN	0	0	0		13	11	0	8.98343
60S ribosomal protein L26	RPL26	RL26_HUMAN	0	0	0		5	9	10	8.957
Suprabasin	SBSN	SBSN_HUMAN	0	0	0		12	12	0	8.93343
60S ribosomal protein L12	RPL12	RL12_HUMAN	0	0	0		10	8	6	8.92426
Desmoplakin	DSP	DESP_HUMAN	20	20	0		159	160	23	8.53231
40S ribosomal protein S11	RPS11	RS11_HUMAN	3	0	0		12	11	14	8.16586
Serine/threonine-protein kinase 38	STK38	STK38_HUMAN	0	0	0		9	7	5	7.80355
Ethylmalonyl-CoA decarboxylase	ECHDC1	ECHD1_HUMAN	0	0	0		6	8	7	7.79492
Heat shock protein beta-1	HSPB1	HSPB1_HUMAN	4	2	0		28	18	5	7.68406
Spliceosome RNA helicase DDX39B	DDX39B	DX39B_HUMAN	0	0	0		9	5	6	7.54092
Unconventional myosin-Ib	MYO1B	MYO1B_HUMAN	0	0	0		7	12	2	7.49145
Hydroxyacylglutathione hydrolase, mitochondrial	HAGH	GLO2_HUMAN	0	0	0		5	7	7	7.07825
Tubulin alpha-1C chain	TUBA1C	TBA1C_HUMAN	0	0	0		10	8	0	6.83341
Epiplakin	EPPK1	EPIPL_HUMAN	0	0	0		8	10	0	6.7334
Caspase-14	CASP14	CASPE_HUMAN	0	0	0		7	11	0	6.68339
Protein POF1B	POF1B	POF1B_HUMAN	0	0	0		7	11	0	6.68339
Malate dehydrogenase, mitochondrial	MDH2	MDHM_HUMAN	0	0	0		7	7	4	6.63284
Lon protease homolog, mitochondrial	LONP1	LONM_HUMAN	0	0	0		8	7	3	6.61215
DNA ligase 3	LIG3	DNLI3_HUMAN	0	0	0		6	9	3	6.51214
tRNA selenocysteine 1-associated protein 1	TRNAU1AP	TSAP1_HUMAN	0	0	0		7	4	6	6.4409
T-complex protein 1 subunit beta	CCT2	TCPB_HUMAN	0	0	0		6	6	5	6.3202
Ribosome biogenesis protein NSA2 homolog	NSA2	NSA2_HUMAN	0	0	0		6	0	9	6.26965
Dehydrogenase/reductase SDR family member 4	DHRS4	DHRS4_HUMAN	0	0	0		0	10	6	6.09085
Serpin B3	SERPINB3	SPB3_HUMAN	0	0	0		8	8	0	6.06673
Tripartite motif-containing protein 29	TRIM29	TRI29_HUMAN	0	0	0		8	8	0	6.06673
RNA-binding protein PNO1	PNO1	PNO1_HUMAN	0	0	0		9	3	4	6.06619
Probable ATP-dependent RNA helicase DDX47	DDX47	DDX47_HUMAN	0	0	0		3	6	7	5.97823
60S ribosomal protein L28	RPL28	RL28_HUMAN	0	0	0		5	6	5	5.93685
Zinc finger CCCH-type antiviral protein 1-like	ZC3HAV1L	ZCCHL_HUMAN	0	0	0		7	0	7	5.84493
2-methoxy-6-polyprenyl-1,4-benzoquinol methylase, mitochondrial	COQ5	COQ5_HUMAN	0	0	0		0	9	6	5.75751
Peptidyl-prolyl cis-trans isomerase A	PPIA	PPIA_HUMAN	0	0	0		6	9	0	5.63338
Endoplasmin	HSP90B1	ENPL_HUMAN	0	4	0		8	10	13	5.51679
Histone H4	HIST1H4A	H4_HUMAN	0	0	0		8	6	0	5.40006
Insulin-degrading enzyme	IDE	IDE_HUMAN	0	0	0		8	6	0	5.40006
Junction plakoglobin	JUP	PLAK_HUMAN	3	4	3		29	26	4	5.21492
Phosphoglycerate kinase 1	PGK1	PGK1_HUMAN	3	3	0		16	11	7	5.14214
DNA replication licensing factor MCM2	MCM2	MCM2_HUMAN	0	0	0		6	6	2	5.10811
Alpha-actinin-4	ACTN4	ACTN4_HUMAN	0	0	0		6	7	0	4.96671
GTPase-activating protein and VPS9 domain-containing protein 1	GAPVD1	GAPD1_HUMAN	0	0	0		5	8	0	4.91671
Septin-2	SEPT2	SEPT2_HUMAN	0	0	0		3	5	5	4.83684
Leucine--tRNA ligase, cytoplasmic	LARS	SYLC_HUMAN	0	0	0		5	5	3	4.79546
Transitional endoplasmic reticulum ATPase	VCP	TERA_HUMAN	0	0	0		9	3	0	4.7834
Uncharacterized protein C19orf52	C19orf52	CS052_HUMAN	0	0	0		0	6	6	4.75751
60S ribosomal protein L32	RPL32	RL32_HUMAN	0	0	0		0	6	6	4.75751
Cathepsin D	CTSD	CATD_HUMAN	0	0	0		6	6	0	4.63338
Desmocollin-1	DSC1	DSC1_HUMAN	0	0	0		4	8	0	4.53336
ER membrane protein complex subunit 2	EMC2	EMC2_HUMAN	0	0	0		3	4	5	4.50351
Lymphoid-specific helicase	HELLS	HELLS_HUMAN	0	0	0		4	4	4	4.48282
Glycogen phosphorylase, brain form	PYGB	PYGB_HUMAN	0	0	0		4	4	4	4.48282
Glutathione S-transferase P	GSTP1	GSTP1_HUMAN	0	0	0		4	4	4	4.48282
Annexin A2	ANXA2	ANXA2_HUMAN	0	0	0		3	7	2	4.29142
Cytosolic Fe-S cluster assembly factor NUBP2	NUBP2	NUBP2_HUMAN	0	0	0		0	7	4	4.28279
Myeloid leukemia factor 2	MLF2	MLF2_HUMAN	0	6	0		7	15	11	4.27795
14-3-3 protein eta	YWHAH	1433F_HUMAN	0	0	0		5	0	5	4.27019
Annexin A5	ANXA5	ANXA5_HUMAN	0	0	0		5	6	0	4.25004
14-3-3 protein theta	YWHAQ	1433T_HUMAN	0	0	0		6	0	4	4.2495
Serine palmitoyltransferase 1	SPTLC1	SPTC1_HUMAN	0	0	0		3	2	6	4.24087
Aldehyde dehydrogenase X, mitochondrial	ALDH1B1	AL1B1_HUMAN	3	3	0		12	12	4	4.15995
Chloride intracellular channel protein 1	CLIC1	CLIC1_HUMAN	0	0	0		2	6	3	3.97877
DnaJ homolog subfamily B member 6	DNAJB6	DNJB6_HUMAN	0	0	0		3	0	6	3.90754
Uridine 5'-monophosphate synthase	UMPS	UMPS_HUMAN	0	0	0		3	0	6	3.90754
Probable ATP-dependent RNA helicase YTHDC2	YTHDC2	YTDC2_HUMAN	0	0	0		0	0	8	3.89891
DnaJ homolog subfamily B member 12	DNAJB12	DJB12_HUMAN	0	0	0		0	0	8	3.89891
Polymeric immunoglobulin receptor	PIGR	PIGR_HUMAN	0	0	0		0	0	8	3.89891
Plakophilin-1	PKP1	PKP1_HUMAN	0	0	0		4	6	0	3.8667
Nicotinamide phosphoribosyltransferase	NAMPT	NAMPT_HUMAN	4	0	0		7	6	8	3.85907
60S ribosomal protein L7-like 1	RPL7L1	RL7L_HUMAN	0	0	0		6	0	3	3.84547
Peroxisomal membrane protein PMP34	SLC25A17	PM34_HUMAN	0	0	0		6	0	3	3.84547
Tetratricopeptide repeat protein 19, mitochondrial	TTC19	TTC19_HUMAN	0	0	0		3	2	5	3.83684
39S ribosomal protein L24, mitochondrial	MRPL24	RM24_HUMAN	0	0	0		7	0	2	3.82478
Dual specificity protein phosphatase 9	DUSP9	DUS9_HUMAN	0	0	0		4	2	4	3.81615
ATP-dependent RNA helicase DDX19A	DDX19A	DD19A_HUMAN	4	0	0		6	8	7	3.80022
Extended synaptotagmin-2	ESYT2	ESYT2_HUMAN	0	0	0		4	3	3	3.74545
Tubulin-folding cofactor B	TBCB	TBCB_HUMAN	0	0	0		4	3	3	3.74545
14-3-3 protein beta/alpha	YWHAB	1433B_HUMAN	0	0	0		8	0	0	3.7334
Elongation factor Ts, mitochondrial	TSFM	EFTS_HUMAN	0	0	0		2	4	4	3.71614
Syntaxin-binding protein 1	STXBP1	STXB1_HUMAN	0	0	0		2	4	4	3.71614
V-type proton ATPase subunit H	ATP6V1H	VATH_HUMAN	0	0	0		0	4	5	3.68682
14-3-3 protein epsilon	YWHAE	1433E_HUMAN	0	3	4		0	25	11	3.66536
Pre-mRNA-processing factor 19	PRPF19	PRP19_HUMAN	0	0	2		6	5	6	3.6594
Ran-specific GTPase-activating protein	RANBP1	RANG_HUMAN	3	0	0		9	0	6	3.64071
Carbonic anhydrase 2	CA2	CAH2_HUMAN	0	0	0		6	3	0	3.63338
Uridine-cytidine kinase 2	UCK2	UCK2_HUMAN	0	3	0		0	8	8	3.55965
ATP-binding cassette sub-family E member 1	ABCE1	ABCE1_HUMAN	0	0	0		0	6	3	3.54542
Triosephosphate isomerase	TPI1	TPIS_HUMAN	0	0	0		4	5	0	3.53336
Protein S100-A11	S100A11	S10AB_HUMAN	0	0	0		4	5	0	3.53336
Proline-, glutamic acid- and leucine-rich protein 1	PELP1	PELP1_HUMAN	0	0	2		2	4	10	3.51592
Nucleoporin SEH1	SEH1L	SEH1_HUMAN	0	0	0		3	0	5	3.50351
Elongation factor 1-beta	EEF1B2	EF1B_HUMAN	0	0	0		4	0	4	3.48282
L-aminoadipate-semialdehyde dehydrogenase-phosphopantetheinyl transferase	AASDHPPT	ADPPT_HUMAN	0	0	0		4	0	4	3.48282
Ancient ubiquitous protein 1	AUP1	AUP1_HUMAN	0	0	2		2	5	9	3.47544
Ubiquitin-conjugating enzyme E2 S	UBE2S	UBE2S_HUMAN	0	0	0		5	0	3	3.46213
AP-2 complex subunit mu	AP2M1	AP2M1_HUMAN	4	0	3		10	9	11	3.37911
Glycosylphosphatidylinositol anchor attachment 1 protein	GPAA1	GPAA1_HUMAN	0	0	0		3	3	3	3.36211
Tubulin alpha-1A chain	TUBA1A	TBA1A_HUMAN	0	0	0		7	0	0	3.35005
Protein O-GlcNAcase	MGEA5	OGA_HUMAN	0	0	0		4	3	2	3.34142
Gem-associated protein 4	GEMIN4	GEMI4_HUMAN	0	4	2		5	8	12	3.29941
SUMO-activating enzyme subunit 1	SAE1	SAE1_HUMAN	4	0	0		5	6	7	3.28832
DNA replication licensing factor MCM6	MCM6	MCM6_HUMAN	8	10	5		22	31	27	3.26744
Heat shock cognate 71 kDa protein	HSPA8	HSP7C_HUMAN	69	73	42		213	243	180	3.22706
DNA repair protein RAD50	RAD50	RAD50_HUMAN	6	3	3		9	3	27	3.21279
E3 ubiquitin-protein ligase RING2	RNF2	RING2_HUMAN	0	0	0		0	5	3	3.21209
Prolyl 4-hydroxylase subunit alpha-1	P4HA1	P4HA1_HUMAN	0	0	0		0	5	3	3.21209
Alkyldihydroxyacetonephosphate synthase, peroxisomal	AGPS	ADAS_HUMAN	0	0	0		0	5	3	3.21209
Vacuolar protein sorting-associated protein 33B	VPS33B	VP33B_HUMAN	0	2	0		5	4	3	3.2115
Tropomyosin alpha-3 chain	TPM3	TPM3_HUMAN	0	0	0		4	4	0	3.20003
Dihydrolipoyl dehydrogenase, mitochondrial	DLD	DLDH_HUMAN	0	0	0		4	4	0	3.20003
Heat shock protein 105 kDa	HSPH1	HS105_HUMAN	5	7	0		13	17	10	3.198
AP-1 complex subunit gamma-1	AP1G1	AP1G1_HUMAN	5	5	0		10	11	12	3.1901
Exportin-5	XPO5	XPO5_HUMAN	5	0	3		11	15	6	3.16019
Double-stranded RNA-binding protein Staufen homolog 1	STAU1	STAU1_HUMAN	2	0	0		4	0	6	3.15756
Synembryn-A	RIC8A	RIC8A_HUMAN	0	0	0		3	5	0	3.15002
Plastin-3	PLS3	PLST_HUMAN	0	0	0		3	5	0	3.15002
Ig gamma-1 chain C region	IGHG1	IGHG1_HUMAN	0	0	0		3	5	0	3.15002
Phenylalanine--tRNA ligase alpha subunit	FARSA	SYFA_HUMAN	0	6	0		11	9	4	3.11572
Peroxisomal biogenesis factor 3	PEX3	PEX3_HUMAN	0	0	0		3	0	4	3.09948
Core histone macro-H2A.1	H2AFY	H2AY_HUMAN	0	0	0		3	0	4	3.09948
AH receptor-interacting protein	AIP	AIP_HUMAN	0	0	0		3	0	4	3.09948
Cyclin-dependent kinase 9	CDK9	CDK9_HUMAN	0	0	0		3	0	4	3.09948
Sideroflexin-5	SFXN5	SFXN5_HUMAN	0	0	0		3	0	4	3.09948
Keratin-associated protein 13-2	KRTAP13-2	KR132_HUMAN	0	0	0		3	0	4	3.09948
Sister chromatid cohesion protein PDS5 homolog B	PDS5B	PDS5B_HUMAN	0	0	0		0	0	6	3.09085
Fanconi anemia group D2 protein	FANCD2	FACD2_HUMAN	0	0	0		0	0	6	3.09085
AP-3 complex subunit delta-1	AP3D1	AP3D1_HUMAN	0	0	0		0	0	6	3.09085
ATP-dependent RNA helicase DDX24	DDX24	DDX24_HUMAN	0	0	0		0	0	6	3.09085
Target of rapamycin complex subunit LST8	MLST8	LST8_HUMAN	0	0	0		4	0	3	3.07879
Cornifin-B	SPRR1B	SPR1B_HUMAN	0	0	0		4	0	3	3.07879
Solute carrier family 35 member F6	SLC35F6	S35F6_HUMAN	0	0	0		4	0	3	3.07879
Aspartate--tRNA ligase, cytoplasmic	DARS	SYDC_HUMAN	2	5	0		6	8	9	3.03726
Isoleucine--tRNA ligase, cytoplasmic	IARS	SYIC_HUMAN	8	8	6		17	19	35	3.03294
DNA repair protein XRCC1	XRCC1	XRCC1_HUMAN	4	0	0		9	0	6	3.02635
Ezrin	EZR	EZRI_HUMAN	0	0	0		0	7	0	3
Serpin B4	SERPINB4	SPB4_HUMAN	0	0	0		6	0	0	2.96671
Neurofilament light polypeptide	NEFL	NFL_HUMAN	0	3	0		2	6	6	2.96485
Polypyrimidine tract-binding protein 1	PTBP1	PTBP1_HUMAN	7	0	2		15	5	9	2.88141
HEAT repeat-containing protein 5B	HEATR5B	HTR5B_HUMAN	0	0	0		4	3	0	2.8667
Acyl-CoA-binding protein	DBI	ACBP_HUMAN	0	0	0		4	3	0	2.8667
Macrophage-capping protein	CAPG	CAPG_HUMAN	0	0	0		4	3	0	2.8667
Protein VPRBP	VPRBP	VPRBP_HUMAN	2	0	0		0	2	7	2.8171
RuvB-like 1	RUVBL1	RUVB1_HUMAN	0	0	0		3	4	0	2.81669
60S ribosomal protein L27a	RPL27A	RL27A_HUMAN	0	0	13		17	16	24	2.8037
AP-2 complex subunit alpha-2	AP2A2	AP2A2_HUMAN	6	4	0		7	11	11	2.79966
Nuclear pore complex protein Nup160	NUP160	NU160_HUMAN	4	0	3		3	5	16	2.78088
Dynactin subunit 1	DCTN1	DCTN1_HUMAN	6	4	0		5	13	11	2.77372
28S ribosomal protein S2, mitochondrial	MRPS2	RT02_HUMAN	2	9	0		0	20	12	2.76961
Transportin-3	TNPO3	TNPO3_HUMAN	4	3	0		8	8	5	2.76717
Fructose-bisphosphate aldolase A	ALDOA	ALDOA_HUMAN	6	7	6		22	26	11	2.74602
Dihydrolipoyllysine-residue acetyltransferase component of pyruvate dehydrogenase complex, mitochondrial	DLAT	ODP2_HUMAN	5	3	0		7	8	8	2.72618
ATPase family AAA domain-containing protein 3B	ATAD3B	ATD3B_HUMAN	4	6	0		14	12	3	2.72222
Melanoma-associated antigen G1	NDNL2	MAGG1_HUMAN	0	0	0		2	0	4	2.71614
ADP/ATP translocase 1	SLC25A4	ADT1_HUMAN	4	4	3		19	0	11	2.71057
General transcription factor 3C polypeptide 3	GTF3C3	TF3C3_HUMAN	4	0	0		5	6	4	2.69739
Proteasome-associated protein ECM29 homolog	ECM29	ECM29_HUMAN	16	7	7		32	36	19	2.69637
3'(2'),5'-bisphosphate nucleotidase 1	BPNT1	BPNT1_HUMAN	0	0	0		3	0	3	2.69545
Calcyclin-binding protein	CACYBP	CYBP_HUMAN	0	0	0		3	0	3	2.69545
High mobility group protein B1	HMGB1	HMGB1_HUMAN	0	0	0		3	0	3	2.69545
39S ribosomal protein L16, mitochondrial	MRPL16	RM16_HUMAN	0	0	0		3	0	3	2.69545
Protein diaphanous homolog 1	DIAPH1	DIAP1_HUMAN	0	0	0		0	0	5	2.68682
Probable serine carboxypeptidase CPVL	CPVL	CPVL_HUMAN	0	0	0		0	0	5	2.68682
ATP-dependent RNA helicase DDX39A	DDX39A	DX39A_HUMAN	0	0	0		0	0	5	2.68682
Histone lysine demethylase PHF8	PHF8	PHF8_HUMAN	0	0	0		0	0	5	2.68682
Mitochondrial 2-oxodicarboxylate carrier	SLC25A21	ODC_HUMAN	0	0	0		0	0	5	2.68682
Condensin complex subunit 2	NCAPH	CND2_HUMAN	0	3	0		3	7	3	2.68188
Lactadherin	MFGE8	MFGM_HUMAN	3	4	0		7	6	7	2.66631
Protein transport protein Sec16A	SEC16A	SC16A_HUMAN	0	0	0		0	2	4	2.61612
Vacuolar protein sorting-associated protein 16 homolog	VPS16	VPS16_HUMAN	0	0	0		0	2	4	2.61612
Ubiquitin-40S ribosomal protein S27a	RPS27A	RS27A_HUMAN	40	45	3		80	101	46	2.61355
GTP-binding nuclear protein Ran	RAN	RAN_HUMAN	3	0	0		3	5	4	2.59982
F-actin-capping protein subunit beta	CAPZB	CAPZB_HUMAN	0	6	0		7	8	5	2.59978
Translation initiation factor eIF-2B subunit alpha	EIF2B1	EI2BA_HUMAN	0	4	3		0	17	7	2.59768
Nascent polypeptide-associated complex subunit alpha, muscle-specific form	NACA	NACAM_HUMAN	0	0	2		5	3	4	2.59548
Ubiquitin-like modifier-activating enzyme 1	UBA1	UBA1_HUMAN	7	4	0		12	14	4	2.59009
Proteasome subunit alpha type-7	PSMA7	PSA7_HUMAN	0	0	0		5	0	0	2.58337
NADH dehydrogenase [ubiquinone] iron-sulfur protein 3, mitochondrial	NDUFS3	NDUS3_HUMAN	0	0	0		5	0	0	2.58337
Transcription termination factor 2	TTF2	TTF2_HUMAN	0	0	0		5	0	0	2.58337
Transaldolase	TALDO1	TALDO_HUMAN	0	0	0		5	0	0	2.58337
Nck-associated protein 1	NCKAP1	NCKP1_HUMAN	2	0	0		4	0	4	2.56293
Structural maintenance of chromosomes protein 2	SMC2	SMC2_HUMAN	8	6	3		18	20	8	2.56203
Pescadillo homolog	PES1	PESC_HUMAN	3	3	2		6	8	8	2.56035
Exportin-7	XPO7	XPO7_HUMAN	4	4	0		4	10	8	2.56024
DNA polymerase delta catalytic subunit	POLD1	DPOD1_HUMAN	5	4	2		9	15	6	2.55509
Oxygen-dependent coproporphyrinogen-III oxidase, mitochondrial	CPOX	HEM6_HUMAN	0	0	0		0	3	3	2.54542
Radical S-adenosyl methionine domain-containing protein 1, mitochondrial	RSAD1	RSAD1_HUMAN	0	0	0		0	3	3	2.54542
Glypican-4	GPC4	GPC4_HUMAN	0	0	0		0	3	3	2.54542
Biliverdin reductase A	BLVRA	BIEA_HUMAN	0	0	0		0	3	3	2.54542
Replication initiator 1	REPIN1	REPI1_HUMAN	0	0	0		0	3	3	2.54542
Glutaminyl-peptide cyclotransferase	QPCT	QPCT_HUMAN	0	0	0		4	2	0	2.53336
Ubiquitin thioesterase OTUB1	OTUB1	OTUB1_HUMAN	0	0	0		4	2	0	2.53336
Tubulin beta-3 chain	TUBB3	TBB3_HUMAN	0	0	0		4	2	0	2.53336
Exosome complex exonuclease RRP44	DIS3	RRP44_HUMAN	5	5	4		13	15	11	2.53249
Farnesyl pyrophosphate synthase	FDPS	FPPS_HUMAN	5	0	0		6	4	6	2.52682
Mitochondrial carnitine/acylcarnitine carrier protein	SLC25A20	MCAT_HUMAN	0	7	3		0	23	8	2.50572
U3 small nucleolar RNA-associated protein 18 homolog	UTP18	UTP18_HUMAN	0	0	0		3	3	0	2.48336
SH3 domain-binding glutamic acid-rich-like protein 3	SH3BGRL3	SH3L3_HUMAN	0	0	0		3	3	0	2.48336
Profilin-1	PFN1	PROF1_HUMAN	0	0	0		3	3	0	2.48336
Fanconi anemia group I protein	FANCI	FANCI_HUMAN	3	0	0		0	2	8	2.48218
Proteasome subunit alpha type-3	PSMA3	PSA3_HUMAN	3	0	0		7	0	3	2.48017
GPN-loop GTPase 3	GPN3	GPN3_HUMAN	0	0	0		0	4	2	2.47473
tRNA-splicing ligase RtcB homolog	RTCB	RTCB_HUMAN	0	3	0		5	0	5	2.43899
Alpha-enolase	ENO1	ENOA_HUMAN	11	5	13		32	30	21	2.43427
Telomere length regulation protein TEL2 homolog	TELO2	TELO2_HUMAN	0	0	0		2	4	0	2.43335
Protein TFG	TFG	TFG_HUMAN	0	0	0		2	4	0	2.43335
DNA mismatch repair protein Msh2	MSH2	MSH2_HUMAN	4	3	0		6	5	7	2.42505
YTH domain-containing family protein 2	YTHDF2	YTHD2_HUMAN	3	6	0		7	8	8	2.42439
UPF0488 protein C8orf33	C8orf33	CH033_HUMAN	3	5	5		0	22	14	2.40285
Translation initiation factor eIF-2B subunit delta	EIF2B4	EI2BD_HUMAN	2	3	4		9	7	9	2.39326
26S proteasome non-ATPase regulatory subunit 6	PSMD6	PSMD6_HUMAN	5	0	0		8	7	0	2.3916
Dynamin-like 120 kDa protein, mitochondrial	OPA1	OPA1_HUMAN	3	4	0		2	7	9	2.3911
60S ribosomal protein L14	RPL14	RL14_HUMAN	17	6	0		20	20	13	2.33561
Iron-sulfur protein NUBPL	NUBPL	NUBPL_HUMAN	0	0	0		0	5	0	2.33333
Protein PBDC1	PBDC1	PBDC1_HUMAN	0	0	0		0	5	0	2.33333
Guanine nucleotide-binding protein subunit beta-like protein 1	GNB1L	GNB1L_HUMAN	0	0	0		2	0	3	2.31211
Gem-associated protein 8	GEMIN8	GEMI8_HUMAN	0	0	0		2	0	3	2.31211
Septin-9	SEPT9	SEPT9_HUMAN	0	2	0		0	5	3	2.31181
Solute carrier family 25 member 33	SLC25A33	S2533_HUMAN	3	3	0		6	4	5	2.30207
AP-1 complex subunit beta-1	AP1B1	AP1B1_HUMAN	0	3	0		0	5	5	2.29618
Tubulin beta-6 chain	TUBB6	TBB6_HUMAN	6	9	0		16	12	7	2.28904
Probable glutamate--tRNA ligase, mitochondrial	EARS2	SYEM_HUMAN	4	2	0		6	5	4	2.28749
Hypoxia up-regulated protein 1	HYOU1	HYOU1_HUMAN	0	0	0		0	0	4	2.28279
Aldose reductase	AKR1B1	ALDR_HUMAN	0	0	0		0	0	4	2.28279
Protein CIP2A	KIAA1524	CIP2A_HUMAN	0	0	0		0	0	4	2.28279
Protein timeless homolog	TIMELESS	TIM_HUMAN	0	0	0		0	0	4	2.28279
Poly [ADP-ribose] polymerase 2	PARP2	PARP2_HUMAN	0	0	0		0	0	4	2.28279
Exosome component 10	EXOSC10	EXOSX_HUMAN	0	0	0		0	0	4	2.28279
OTU domain-containing protein 4	OTUD4	OTUD4_HUMAN	0	0	0		0	0	4	2.28279
Focadhesin	FOCAD	FOCAD_HUMAN	0	0	0		0	0	4	2.28279
UPF0505 protein C16orf62	C16orf62	CP062_HUMAN	0	0	0		0	0	4	2.28279
RNA polymerase II-associated protein 1	RPAP1	RPAP1_HUMAN	0	0	0		0	0	4	2.28279
Adenylosuccinate lyase	ADSL	PUR8_HUMAN	0	0	0		0	0	4	2.28279
BRISC and BRCA1-A complex member 1	BABAM1	BABA1_HUMAN	0	0	0		0	0	4	2.28279
Neuronal-specific septin-3	SEPT3	SEPT3_HUMAN	0	0	0		0	0	4	2.28279
Mitochondrial ribonuclease P protein 1	TRMT10C	MRRP1_HUMAN	8	7	0		12	9	13	2.28205
Helicase-like transcription factor	HLTF	HLTF_HUMAN	4	3	0		6	5	6	2.28085
Structural maintenance of chromosomes protein 4	SMC4	SMC4_HUMAN	10	11	3		6	9	38	2.28059
60S ribosomal protein L11	RPL11	RL11_HUMAN	10	0	4		16	10	10	2.26852
Condensin complex subunit 1	NCAPD2	CND1_HUMAN	5	0	7		6	11	18	2.26577
Cell differentiation protein RCD1 homolog	RQCD1	RCD1_HUMAN	0	3	0		0	6	4	2.2558
Dolichol-phosphate mannosyltransferase subunit 1	DPM1	DPM1_HUMAN	5	8	8		32	0	18	2.22273
RNA/RNP complex-1-interacting phosphatase	DUSP11	DUS11_HUMAN	0	0	0		0	2	3	2.21209
MMS19 nucleotide excision repair protein homolog	MMS19	MMS19_HUMAN	5	0	0		0	4	9	2.21204
Protein TBRG4	TBRG4	TBRG4_HUMAN	0	3	0		4	6	0	2.20853
WASH complex subunit strumpellin	KIAA0196	STRUM_HUMAN	0	0	0		4	0	0	2.20003
Protein-glutamine gamma-glutamyltransferase E	TGM3	TGM3_HUMAN	0	0	0		4	0	0	2.20003
L-lactate dehydrogenase C chain	LDHC	LDHC_HUMAN	0	0	0		4	0	0	2.20003
NEDD8 ultimate buster 1	NUB1	NUB1_HUMAN	0	0	0		4	0	0	2.20003
Galectin-3	LGALS3	LEG3_HUMAN	0	0	0		4	0	0	2.20003
Probable ATP-dependent RNA helicase DDX27	DDX27	DDX27_HUMAN	2	0	0		0	3	4	2.17044
Electron transfer flavoprotein subunit beta	ETFB	ETFB_HUMAN	0	6	6		20	0	11	2.16769
Dual specificity mitogen-activated protein kinase kinase 3	MAP2K3	MP2K3_HUMAN	4	2	0		0	10	4	2.16455
ATP-dependent Clp protease proteolytic subunit, mitochondrial	CLPP	CLPP_HUMAN	0	2	3		10	0	4	2.16122
DNA-directed RNA polymerase II subunit RPB2	POLR2B	RPB2_HUMAN	0	0	0		3	2	0	2.15002
3-hydroxyisobutyryl-CoA hydrolase, mitochondrial	HIBCH	HIBCH_HUMAN	0	0	0		3	2	0	2.15002
Trifunctional purine biosynthetic protein adenosine-3	GART	PUR2_HUMAN	10	9	5		18	18	18	2.14304
General transcription factor II-I	GTF2I	GTF2I_HUMAN	0	0	0		0	3	2	2.14139
DNA-directed RNA polymerase, mitochondrial	POLRMT	RPOM_HUMAN	0	0	0		0	3	2	2.14139
Erythrocyte band 7 integral membrane protein	STOM	STOM_HUMAN	0	5	0		0	10	4	2.1357
Eukaryotic translation initiation factor 3 subunit C	EIF3C	EIF3C_HUMAN	8	0	0		5	10	5	2.11608
Phosphoserine aminotransferase	PSAT1	SERC_HUMAN	2	0	4		6	6	6	2.11114
Threonine--tRNA ligase, mitochondrial	TARS2	SYTM_HUMAN	2	0	0		4	3	0	2.10954
Coatomer subunit beta	COPB1	COPB_HUMAN	12	18	4		24	28	21	2.10785
Serine/threonine-protein phosphatase 2A 65 kDa regulatory subunit A alpha isoform	PPP2R1A	2AAA_HUMAN	0	5	2		7	5	6	2.1038
E3 ubiquitin-protein ligase TRIM21	TRIM21	RO52_HUMAN	9	7	5		15	22	11	2.10059
Paired amphipathic helix protein Sin3a	SIN3A	SIN3A_HUMAN	4	0	0		0	0	9	2.09779
Peroxisomal 2,4-dienoyl-CoA reductase	DECR2	DECR2_HUMAN	0	3	3		0	12	5	2.09194
Superkiller viralicidic activity 2-like 2	SKIV2L2	SK2L2_HUMAN	9	7	4		16	17	11	2.08147
Eukaryotic translation initiation factor 4 gamma 2	EIF4G2	IF4G2_HUMAN	10	6	0		12	10	11	2.0758
SUN domain-containing protein 1	SUN1	SUN1_HUMAN	0	2	0		0	4	3	2.07191
Mitochondrial 10-formyltetrahydrofolate dehydrogenase	ALDH1L2	AL1L2_HUMAN	10	4	0		8	10	11	2.06949
Structural maintenance of chromosomes protein 1A	SMC1A	SMC1A_HUMAN	11	8	8		11	18	31	2.06414
Graves disease carrier protein	SLC25A16	GDC_HUMAN	3	2	0		0	7	4	2.04481
Lethal(2) giant larvae protein homolog 1	LLGL1	L2GL1_HUMAN	0	2	0		3	4	0	2.02724
Probable ATP-dependent RNA helicase DDX52	DDX52	DDX52_HUMAN	5	5	0		6	8	7	2.01374
[Pyruvate dehydrogenase (acetyl-transferring)] kinase isozyme 1, mitochondrial	PDK1	PDK1_HUMAN	0	4	0		5	6	0	2.01216
Protein S100-A9	S100A9	S10A9_HUMAN	0	0	0		0	4	0	2
FAS-associated factor 2	FAF2	FAF2_HUMAN	0	0	0		0	4	0	2
Methionyl-tRNA formyltransferase, mitochondrial	MTFMT	FMT_HUMAN	0	0	0		0	4	0	2
40S ribosomal protein S14	RPS14	RS14_HUMAN	0	0	0		0	4	0	2
Cytosolic acyl coenzyme A thioester hydrolase	ACOT7	BACH_HUMAN	0	0	0		0	4	0	2
Myosin light polypeptide 6	MYL6	MYL6_HUMAN	0	0	0		0	4	0	2
Phosphatidylserine decarboxylase proenzyme	PISD	PISD_HUMAN	3	2	0		3	3	5	1.99104
Translation initiation factor eIF-2B subunit gamma	EIF2B3	EI2BG_HUMAN	2	0	0		3	0	3	1.98352
Heat shock 70 kDa protein 1A/1B	HSPA1A	HSP71_HUMAN	89	85	46		164	158	134	1.9648
Chromosome transmission fidelity protein 18 homolog	CHTF18	CTF18_HUMAN	0	3	0		3	2	4	1.96071
Ribonuclease H2 subunit A	RNASEH2A	RNH2A_HUMAN	0	2	0		2	0	4	1.95486
Phosphatidylinositol 4-kinase alpha	PI4KA	PI4KA_HUMAN	5	0	0		7	5	0	1.95361
Eukaryotic translation initiation factor 3 subunit D	EIF3D	EIF3D_HUMAN	18	21	5		26	39	23	1.95292
14-3-3 protein zeta/delta	YWHAZ	1433Z_HUMAN	6	8	8		31	5	11	1.93764
Protein unc-45 homolog A	UNC45A	UN45A_HUMAN	8	4	0		9	10	5	1.93576
Poly [ADP-ribose] polymerase 1	PARP1	PARP1_HUMAN	60	51	34		96	105	97	1.92848
Protein flightless-1 homolog	FLII	FLII_HUMAN	5	5	4		6	9	14	1.92318
6-phosphogluconolactonase	PGLS	6PGL_HUMAN	0	3	0		7	0	0	1.91344
tRNA (cytosine(34)-C(5))-methyltransferase	NSUN2	NSUN2_HUMAN	11	11	10		21	26	21	1.9119
Gamma-tubulin complex component 2	TUBGCP2	GCP2_HUMAN	0	0	0		2	0	2	1.90808
Neutral amino acid transporter B(0)	SLC1A5	AAAT_HUMAN	6	0	0		5	5	4	1.89525
Cytoplasmic tRNA 2-thiolation protein 1	CTU1	CTU1_HUMAN	3	0	0		0	5	3	1.88387
U2 small nuclear ribonucleoprotein A'	SNRPA1	RU2A_HUMAN	0	0	0		0	0	3	1.87876
MAP7 domain-containing protein 1	MAP7D1	MA7D1_HUMAN	0	0	0		0	0	3	1.87876
Nicotinamide/nicotinic acid mononucleotide adenylyltransferase 1	NMNAT1	NMNA1_HUMAN	0	0	0		0	0	3	1.87876
Trafficking protein particle complex subunit 8	TRAPPC8	TPPC8_HUMAN	0	0	0		0	0	3	1.87876
F-box only protein 22	FBXO22	FBX22_HUMAN	0	0	0		0	0	3	1.87876
Pyruvate carboxylase, mitochondrial	PC	PYC_HUMAN	0	0	0		0	0	3	1.87876
Hypermethylated in cancer 2 protein	HIC2	HIC2_HUMAN	0	0	0		0	0	3	1.87876
Eukaryotic translation initiation factor 3 subunit M	EIF3M	EIF3M_HUMAN	0	0	0		0	0	3	1.87876
FACT complex subunit SSRP1	SSRP1	SSRP1_HUMAN	0	0	0		0	0	3	1.87876
Rab3 GTPase-activating protein non-catalytic subunit	RAB3GAP2	RBGPR_HUMAN	0	0	0		0	0	3	1.87876
DNA polymerase delta subunit 3	POLD3	DPOD3_HUMAN	0	0	0		0	0	3	1.87876
Opioid growth factor receptor	OGFR	OGFR_HUMAN	0	0	0		0	0	3	1.87876
SWI/SNF-related matrix-associated actin-dependent regulator of chromatin subfamily A containing DEAD/H box 1	SMARCAD1	SMRCD_HUMAN	0	0	0		0	0	3	1.87876
Lysophosphatidylcholine acyltransferase 1	LPCAT1	PCAT1_HUMAN	0	0	0		0	0	3	1.87876
Cell division control protein 45 homolog	CDC45	CDC45_HUMAN	0	3	0		0	4	4	1.87502
Tubulin beta-4A chain	TUBB4A	TBB4A_HUMAN	0	2	0		5	0	0	1.85931
Coiled-coil domain-containing protein 47	CCDC47	CCD47_HUMAN	0	4	3		5	7	5	1.84499
WD repeat-containing protein 1	WDR1	WDR1_HUMAN	0	6	4		7	8	8	1.84124
E3 ubiquitin-protein ligase HUWE1	HUWE1	HUWE1_HUMAN	36	34	7		38	52	51	1.84059
DNA-directed RNA polymerase II subunit RPB3	POLR2C	RPB3_HUMAN	2	0	2		5	0	4	1.83635
Dual specificity mitogen-activated protein kinase kinase 2	MAP2K2	MP2K2_HUMAN	2	2	3		7	5	3	1.83287
Creatine kinase B-type	CKB	KCRB_HUMAN	11	8	4		18	17	9	1.82921
Heterogeneous nuclear ribonucleoprotein H3	HNRNPH3	HNRH3_HUMAN	13	13	11		24	26	24	1.82103
D-3-phosphoglycerate dehydrogenase	PHGDH	SERA_HUMAN	26	24	28		62	46	51	1.82091
EH domain-containing protein 1	EHD1	EHD1_HUMAN	2	8	0		5	12	3	1.82014
Hsp70-binding protein 1	HSPBP1	HPBP1_HUMAN	0	0	0		3	0	0	1.81669
Mitochondrial ornithine transporter 1	SLC25A15	ORNT1_HUMAN	0	0	0		3	0	0	1.81669
Proteasome activator complex subunit 3	PSME3	PSME3_HUMAN	0	0	0		3	0	0	1.81669
U3 small nucleolar ribonucleoprotein protein IMP4	IMP4	IMP4_HUMAN	0	0	0		3	0	0	1.81669
5'-nucleotidase domain-containing protein 2	NT5DC2	NT5D2_HUMAN	0	0	0		3	0	0	1.81669
Phosphatidylglycerophosphatase and protein-tyrosine phosphatase 1	PTPMT1	PTPM1_HUMAN	0	0	0		3	0	0	1.81669
Proteasome subunit alpha type-5	PSMA5	PSA5_HUMAN	0	0	0		3	0	0	1.81669
Thioredoxin domain-containing protein 5	TXNDC5	TXND5_HUMAN	0	0	0		3	0	0	1.81669
Keratin-associated protein 13-4	KRTAP13-4	KR134_HUMAN	0	0	0		3	0	0	1.81669
Serine hydroxymethyltransferase, mitochondrial	SHMT2	GLYM_HUMAN	9	6	7		13	15	16	1.81492
RNA-binding protein 7	RBM7	RBM7_HUMAN	0	0	3		4	3	4	1.81492
Heat shock 70 kDa protein 4L	HSPA4L	HS74L_HUMAN	0	0	0		0	2	2	1.80806
Nuclear pore complex protein Nup98-Nup96	NUP98	NUP98_HUMAN	0	0	0		0	2	2	1.80806
PCI domain-containing protein 2	PCID2	PCID2_HUMAN	2	6	7		11	10	11	1.80647
5'-AMP-activated protein kinase subunit gamma-1	PRKAG1	AAKG1_HUMAN	3	0	0		4	0	3	1.80569
Tuberin	TSC2	TSC2_HUMAN	0	0	2		3	5	0	1.80369
EH domain-containing protein 4	EHD4	EHD4_HUMAN	6	0	0		5	8	0	1.79218
F-actin-capping protein subunit alpha-1	CAPZA1	CAZA1_HUMAN	0	2	0		3	3	0	1.78733
Eukaryotic translation initiation factor 3 subunit H	EIF3H	EIF3H_HUMAN	5	4	0		4	8	5	1.77239
DDB1- and CUL4-associated factor 7	DCAF7	DCAF7_HUMAN	0	5	4		5	11	5	1.76836
Rho guanine nucleotide exchange factor 2	ARHGEF2	ARHG2_HUMAN	0	0	0		2	2	0	1.76668
A-kinase anchor protein 8-like	AKAP8L	AKP8L_HUMAN	3	0	5		4	6	9	1.76109
Clathrin heavy chain 1	CLTC	CLH1_HUMAN	20	21	8		24	33	31	1.73787
Probable ATP-dependent RNA helicase DDX56	DDX56	DDX56_HUMAN	0	3	4		5	8	4	1.73315
Myosin-14	MYH14	MYH14_HUMAN	2	0	0		0	5	0	1.71705
ELMO domain-containing protein 2	ELMOD2	ELMD2_HUMAN	0	5	6		5	11	9	1.71384
Sister chromatid cohesion protein PDS5 homolog A	PDS5A	PDS5A_HUMAN	0	4	0		0	5	4	1.71203
ATP synthase subunit s-like protein	ATP5SL	AT5SL_HUMAN	0	5	3		0	11	6	1.70861
MICOS complex subunit MIC27	APOOL	MIC27_HUMAN	0	8	2		0	15	5	1.70847
AP-3 complex subunit beta-1	AP3B1	AP3B1_HUMAN	2	0	5		4	6	7	1.7078
Puromycin-sensitive aminopeptidase	NPEPPS	PSA_HUMAN	22	18	14		29	35	35	1.70332
Pumilio homolog 1	PUM1	PUM1_HUMAN	5	0	0		4	4	3	1.70141
Tetratricopeptide repeat protein 37	TTC37	TTC37_HUMAN	7	6	4		6	8	16	1.69334
Sideroflexin-1	SFXN1	SFXN1_HUMAN	28	30	24		45	54	53	1.69196
Lys-63-specific deubiquitinase BRCC36	BRCC3	BRCC3_HUMAN	4	7	4		10	7	10	1.68053
26S proteasome non-ATPase regulatory subunit 11	PSMD11	PSD11_HUMAN	3	4	0		8	4	0	1.68016
Acidic fibroblast growth factor intracellular-binding protein	FIBP	FIBP_HUMAN	0	0	0		0	3	0	1.66667
Nucleolar GTP-binding protein 2	GNL2	NOG2_HUMAN	0	0	0		0	3	0	1.66667
Lysophospholipid acyltransferase 7	MBOAT7	MBOA7_HUMAN	0	0	0		0	3	0	1.66667
Kinesin-like protein KIF23	KIF23	KIF23_HUMAN	0	0	0		0	3	0	1.66667
PIN2/TERF1-interacting telomerase inhibitor 1	PINX1	PINX1_HUMAN	0	0	0		0	3	0	1.66667
Casein kinase I isoform alpha	CSNK1A1	KC1A_HUMAN	0	0	0		0	3	0	1.66667
Rapamycin-insensitive companion of mTOR	RICTOR	RICTR_HUMAN	0	0	0		0	3	0	1.66667
BAG family molecular chaperone regulator 2	BAG2	BAG2_HUMAN	0	0	0		0	3	0	1.66667
Probable proline--tRNA ligase, mitochondrial	PARS2	SYPM_HUMAN	0	0	0		0	3	0	1.66667
DnaJ homolog subfamily C member 7	DNAJC7	DNJC7_HUMAN	0	0	0		0	3	0	1.66667
F-box/LRR-repeat protein 12	FBXL12	FXL12_HUMAN	0	0	0		0	3	0	1.66667
Dolichyl-diphosphooligosaccharide--protein glycosyltransferase subunit 2	RPN2	RPN2_HUMAN	0	0	0		0	3	0	1.66667
Cleavage and polyadenylation specificity factor subunit 3	CPSF3	CPSF3_HUMAN	0	0	0		0	3	0	1.66667
Metaxin-3	MTX3	MTX3_HUMAN	0	0	0		0	3	0	1.66667
Ras-related GTP-binding protein A	RRAGA	RRAGA_HUMAN	0	0	0		0	3	0	1.66667
Actin-related protein 2/3 complex subunit 3	ARPC3	ARPC3_HUMAN	0	0	0		0	3	0	1.66667
60S acidic ribosomal protein P2	RPLP2	RLA2_HUMAN	0	0	0		0	3	0	1.66667
V-type proton ATPase catalytic subunit A	ATP6V1A	VATA_HUMAN	2	4	0		3	4	4	1.65897
Poly(rC)-binding protein 2	PCBP2	PCBP2_HUMAN	9	6	8		15	17	11	1.65177
mRNA turnover protein 4 homolog	MRTO4	MRT4_HUMAN	2	3	0		4	0	4	1.65084
Leucine-rich PPR motif-containing protein, mitochondrial	LRPPRC	LPPRC_HUMAN	17	18	13		31	36	20	1.647
Tetratricopeptide repeat protein 4	TTC4	TTC4_HUMAN	0	2	0		0	0	4	1.64297
Exportin-T	XPOT	XPOT_HUMAN	3	6	5		8	9	9	1.64289
Nucleoporin NUP188 homolog	NUP188	NU188_HUMAN	5	3	4		2	4	15	1.64052
Importin subunit alpha-5	KPNA1	IMA5_HUMAN	0	3	0		4	3	0	1.63736
Integrator complex subunit 11	CPSF3L	INT11_HUMAN	0	3	0		4	3	0	1.63736
Nuclear pore complex protein Nup214	NUP214	NU214_HUMAN	6	0	0		4	4	4	1.63402
Mitochondrial 2-oxoglutarate/malate carrier protein	SLC25A11	M2OM_HUMAN	16	20	10		6	43	32	1.62748
Interferon-inducible double-stranded RNA-dependent protein kinase activator A	PRKRA	PRKRA_HUMAN	0	2	5		4	4	8	1.624
Survival motor neuron protein	SMN1	SMN_HUMAN	5	6	4		9	7	10	1.62149
WD repeat-containing protein 82	WDR82	WDR82_HUMAN	7	16	7		15	24	14	1.61935
Importin subunit alpha-1	KPNA2	IMA1_HUMAN	5	9	5		9	16	9	1.61663
Stomatin-like protein 2, mitochondrial	STOML2	STML2_HUMAN	3	4	0		4	3	5	1.61631
NADH-ubiquinone oxidoreductase 75 kDa subunit, mitochondrial	NDUFS1	NDUS1_HUMAN	10	11	3		12	13	14	1.61105
Coatomer subunit alpha	COPA	COPA_HUMAN	25	19	14		29	29	40	1.60088
Vimentin	VIM	VIME_HUMAN	127	137	101		209	232	192	1.58806
Methionine--tRNA ligase, cytoplasmic	MARS	SYMC_HUMAN	34	22	6		35	40	24	1.58755
Neurofilament medium polypeptide	NEFM	NFM_HUMAN	9	6	5		7	13	14	1.58755
Isovaleryl-CoA dehydrogenase, mitochondrial	IVD	IVD_HUMAN	0	3	4		5	4	6	1.58631
Activator of 90 kDa heat shock protein ATPase homolog 1	AHSA1	AHSA1_HUMAN	6	7	0		8	7	6	1.58394
Exosome complex component RRP4	EXOSC2	EXOS2_HUMAN	4	5	0		6	5	4	1.5839
Ribonuclease P protein subunit p30	RPP30	RPP30_HUMAN	7	6	6		23	0	8	1.58131
Citrate synthase, mitochondrial	CS	CISY_HUMAN	3	0	0		3	0	3	1.58086
ER membrane protein complex subunit 3	EMC3	EMC3_HUMAN	2	3	0		0	8	0	1.57999
Kinesin-like protein KIF14	KIF14	KIF14_HUMAN	3	0	0		0	0	5	1.5758
Replication factor C subunit 3	RFC3	RFC3_HUMAN	11	15	19		23	29	30	1.5706
Spermidine synthase	SRM	SPEE_HUMAN	13	13	8		18	21	18	1.56642
Tubulin-specific chaperone D	TBCD	TBCD_HUMAN	4	6	4		9	8	7	1.56591
DNA replication licensing factor MCM4	MCM4	MCM4_HUMAN	12	8	9		18	23	10	1.56316
Catenin delta-1	CTNND1	CTND1_HUMAN	12	7	0		8	14	8	1.56283
Conserved oligomeric Golgi complex subunit 1	COG1	COG1_HUMAN	3	4	0		5	5	2	1.55878
Nuclear RNA export factor 1	NXF1	NXF1_HUMAN	2	2	0		2	0	4	1.55355
T-complex protein 1 subunit delta	CCT4	TCPD_HUMAN	23	29	23		50	47	32	1.54781
Putative RNA-binding protein 15	RBM15	RBM15_HUMAN	5	3	0		2	5	6	1.543
AP-2 complex subunit alpha-1	AP2A1	AP2A1_HUMAN	3	3	0		2	8	0	1.53376
Importin-7	IPO7	IPO7_HUMAN	6	0	0		4	7	0	1.53094
Bifunctional purine biosynthesis protein PURH	ATIC	PUR9_HUMAN	0	3	5		7	6	4	1.53016
Protein SEC13 homolog	SEC13	SEC13_HUMAN	3	3	3		6	3	6	1.52966
Nucleosome assembly protein 1-like 1	NAP1L1	NP1L1_HUMAN	0	3	0		0	6	0	1.52311
78 kDa glucose-regulated protein	HSPA5	GRP78_HUMAN	47	37	17		54	57	48	1.52237
Glyceraldehyde-3-phosphate dehydrogenase	GAPDH	G3P_HUMAN	21	19	18		34	38	26	1.51786
AP-1 complex subunit mu-1	AP1M1	AP1M1_HUMAN	13	11	7		16	18	16	1.5177
Ribosomal biogenesis protein LAS1L	LAS1L	LAS1L_HUMAN	6	7	5		13	12	5	1.50614
39S ribosomal protein L46, mitochondrial	MRPL46	RM46_HUMAN	0	3	5		10	0	5	1.50281
Melanoma-associated antigen D2	MAGED2	MAGD2_HUMAN	3	3	4		4	5	8	1.50215
HCLS1-associated protein X-1	HAX1	HAX1_HUMAN	13	14	6		18	20	14	1.50202
Cat eye syndrome critical region protein 5	CECR5	CECR5_HUMAN	11	10	9		14	21	15	1.50057
39S ribosomal protein L2, mitochondrial	MRPL2	RM02_HUMAN	6	9	7		21	0	13	1.49707
Neutral alpha-glucosidase AB	GANAB	GANAB_HUMAN	7	6	0		7	8	5	1.49664
Leucine-rich repeat-containing protein 40	LRRC40	LRC40_HUMAN	13	12	7		17	20	14	1.49341
Apoptosis-inducing factor 1, mitochondrial	AIFM1	AIFM1_HUMAN	23	19	7		28	28	19	1.49108
Inactive hydroxysteroid dehydrogenase-like protein 1	HSDL1	HSDL1_HUMAN	3	7	9		11	8	14	1.48806
Plasma membrane calcium-transporting ATPase 1	ATP2B1	AT2B1_HUMAN	3	0	0		4	2	0	1.4858
ADP/ATP translocase 2	SLC25A5	ADT2_HUMAN	78	66	50		147	44	110	1.48325
Protein MON2 homolog	MON2	MON2_HUMAN	3	2	0		0	0	6	1.47572
Pre-mRNA-splicing factor SYF1	XAB2	SYF1_HUMAN	0	0	0		0	0	2	1.47473
Heat shock 70 kDa protein 4	HSPA4	HSP74_HUMAN	0	0	0		0	0	2	1.47473
DNA-directed RNA polymerase III subunit RPC1	POLR3A	RPC1_HUMAN	0	0	0		0	0	2	1.47473
Structural maintenance of chromosomes protein 6	SMC6	SMC6_HUMAN	0	0	0		0	0	2	1.47473
Elongator complex protein 1	IKBKAP	ELP1_HUMAN	0	0	0		0	0	2	1.47473
G-rich sequence factor 1	GRSF1	GRSF1_HUMAN	0	0	0		0	0	2	1.47473
Malate dehydrogenase, cytoplasmic	MDH1	MDHC_HUMAN	0	0	0		0	0	2	1.47473
Threonine--tRNA ligase, cytoplasmic	TARS	SYTC_HUMAN	0	0	0		0	0	2	1.47473
Ral GTPase-activating protein subunit beta	RALGAPB	RLGPB_HUMAN	0	0	0		0	0	2	1.47473
Vacuolar protein sorting-associated protein 26B	VPS26B	VP26B_HUMAN	0	0	0		0	0	2	1.47473
Protein phosphatase 1F	PPM1F	PPM1F_HUMAN	0	0	0		0	0	2	1.47473
DnaJ homolog subfamily B member 1	DNAJB1	DNJB1_HUMAN	0	0	0		0	0	2	1.47473
Geranylgeranyl transferase type-2 subunit beta	RABGGTB	PGTB2_HUMAN	0	0	0		0	0	2	1.47473
Succinyl-CoA:3-ketoacid coenzyme A transferase 1, mitochondrial	OXCT1	SCOT1_HUMAN	0	0	0		0	0	2	1.47473
Serine/threonine-protein kinase 11-interacting protein	STK11IP	S11IP_HUMAN	0	0	0		0	0	2	1.47473
NLR family member X1	NLRX1	NLRX1_HUMAN	0	0	0		0	0	2	1.47473
Ribosome maturation protein SBDS	SBDS	SBDS_HUMAN	0	0	0		0	0	2	1.47473
Protein transport protein Sec23A	SEC23A	SC23A_HUMAN	0	0	0		0	0	2	1.47473
[Pyruvate dehydrogenase (acetyl-transferring)] kinase isozyme 3, mitochondrial	PDK3	PDK3_HUMAN	5	0	0		4	5	0	1.47389
RRP12-like protein	RRP12	RRP12_HUMAN	4	3	4		5	5	8	1.47263
Sodium/potassium-transporting ATPase subunit alpha-1	ATP1A1	AT1A1_HUMAN	14	14	10		15	20	25	1.47136
Tubulin beta-2A chain	TUBB2A	TBB2A_HUMAN	16	18	0		13	19	17	1.46938
40S ribosomal protein S4, X isoform	RPS4X	RS4X_HUMAN	49	54	45		95	54	86	1.46725
Replication protein A 70 kDa DNA-binding subunit	RPA1	RFA1_HUMAN	4	5	0		3	6	5	1.46683
39S ribosomal protein L4, mitochondrial	MRPL4	RM04_HUMAN	4	0	0		0	7	0	1.46258
Ubiquitin-associated domain-containing protein 2	UBAC2	UBAC2_HUMAN	4	0	0		0	7	0	1.46258
Probable dimethyladenosine transferase	DIMT1	DIM1_HUMAN	16	18	14		23	34	21	1.46087
BRCA1-associated ATM activator 1	BRAT1	BRAT1_HUMAN	3	0	0		3	3	0	1.45647
Mediator of RNA polymerase II transcription subunit 16	MED16	MED16_HUMAN	3	0	0		3	3	0	1.45647
Elongation factor 2	EEF2	EF2_HUMAN	51	36	38		61	69	69	1.45106
ATP-dependent Clp protease ATP-binding subunit clpX-like, mitochondrial	CLPX	CLPX_HUMAN	0	14	15		19	15	18	1.44957
60S ribosomal protein L18	RPL18	RL18_HUMAN	34	4	15		33	24	25	1.44289
Signal recognition particle receptor subunit beta	SRPRB	SRPRB_HUMAN	10	11	6		23	4	13	1.44276
Voltage-dependent anion-selective channel protein 1	VDAC1	VDAC1_HUMAN	15	13	5		15	19	15	1.44122
ATP-dependent zinc metalloprotease YME1L1	YME1L1	YMEL1_HUMAN	0	2	0		0	4	0	1.43945
Protein DENND6A	DENND6A	DEN6A_HUMAN	0	2	0		0	4	0	1.43945
Bifunctional glutamate/proline--tRNA ligase	EPRS	SYEP_HUMAN	29	30	18		26	33	57	1.43794
Huntingtin	HTT	HD_HUMAN	0	0	0		2	0	0	1.43335
Aldehyde dehydrogenase, mitochondrial	ALDH2	ALDH2_HUMAN	0	0	0		2	0	0	1.43335
Germinal-center associated nuclear protein	MCM3AP	GANP_HUMAN	0	0	0		2	0	0	1.43335
Nuclear autoantigenic sperm protein	NASP	NASP_HUMAN	0	0	0		2	0	0	1.43335
RAF proto-oncogene serine/threonine-protein kinase	RAF1	RAF1_HUMAN	0	0	0		2	0	0	1.43335
Origin recognition complex subunit 3	ORC3	ORC3_HUMAN	0	0	0		2	0	0	1.43335
Translationally-controlled tumor protein	TPT1	TCTP_HUMAN	0	0	0		2	0	0	1.43335
Activator of basal transcription 1	ABT1	ABT1_HUMAN	7	7	5		7	9	13	1.42915
C-1-tetrahydrofolate synthase, cytoplasmic	MTHFD1	C1TC_HUMAN	24	18	17		30	33	29	1.42631
Peroxiredoxin-1	PRDX1	PRDX1_HUMAN	20	0	3		16	11	7	1.42283
Phosphoribosyl pyrophosphate synthase-associated protein 2	PRPSAP2	KPRB_HUMAN	17	10	16		17	31	22	1.4192
Methyltransferase-like protein 13	METTL13	MET13_HUMAN	3	3	0		3	6	0	1.41839
Galactokinase	GALK1	GALK1_HUMAN	13	8	8		15	13	16	1.41318
26S proteasome non-ATPase regulatory subunit 13	PSMD13	PSD13_HUMAN	0	4	4		5	6	4	1.40485
60S ribosomal protein L10	RPL10	RL10_HUMAN	43	24	14		46	32	38	1.40298
Guanine nucleotide-binding protein-like 3	GNL3	GNL3_HUMAN	17	17	21		25	33	30	1.39971
Far upstream element-binding protein 3	FUBP3	FUBP3_HUMAN	0	4	7		4	9	8	1.39719
Plectin	PLEC	PLEC_HUMAN	42	36	4		33	44	35	1.39559
Protein SET	SET	SET_HUMAN	3	0	4		6	3	4	1.39219
ATP synthase subunit alpha, mitochondrial	ATP5A1	ATPA_HUMAN	114	100	90		158	154	148	1.38259
Importin subunit beta-1	KPNB1	IMB1_HUMAN	20	23	13		29	31	23	1.38153
Exportin-1	XPO1	XPO1_HUMAN	29	25	4		28	35	17	1.37854
Origin recognition complex subunit 5	ORC5	ORC5_HUMAN	3	0	4		5	4	4	1.37803
5-methylcytosine rRNA methyltransferase NSUN4	NSUN4	NSUN4_HUMAN	0	0	4		4	0	5	1.37529
Lipopolysaccharide-responsive and beige-like anchor protein	LRBA	LRBA_HUMAN	13	8	0		10	7	11	1.37378
Phosphoribosyl pyrophosphate synthase-associated protein 1	PRPSAP1	KPRA_HUMAN	8	6	0		4	11	5	1.36989
Mannose-1-phosphate guanyltransferase beta	GMPPB	GMPPB_HUMAN	3	0	0		0	5	0	1.36849
ADP/ATP translocase 3	SLC25A6	ADT3_HUMAN	16	13	12		31	5	23	1.36665
Unconventional myosin-Ic	MYO1C	MYO1C_HUMAN	9	3	0		6	8	3	1.36319
Transcriptional activator protein Pur-beta	PURB	PURB_HUMAN	4	4	3		7	4	5	1.3567
Cyclin-dependent kinase 1	CDK1	CDK1_HUMAN	43	61	32		41	86	72	1.35551
Coatomer subunit epsilon	COPE	COPE_HUMAN	7	4	0		3	10	3	1.3555
Programmed cell death 6-interacting protein	PDCD6IP	PDC6I_HUMAN	5	4	8		7	9	11	1.35122
DNA mismatch repair protein Msh6	MSH6	MSH6_HUMAN	12	6	5		3	5	23	1.34232
RNA-binding protein 4	RBM4	RBM4_HUMAN	11	11	11		16	21	13	1.33995
La-related protein 7	LARP7	LARP7_HUMAN	3	0	0		0	0	4	1.33884
Testis-expressed sequence 10 protein	TEX10	TEX10_HUMAN	9	10	6		14	13	9	1.33789
Major centromere autoantigen B	CENPB	CENPB_HUMAN	2	0	0		3	0	0	1.33686
Mediator of RNA polymerase II transcription subunit 24	MED24	MED24_HUMAN	2	0	0		3	0	0	1.33686
Nucleolar protein 56	NOP56	NOP56_HUMAN	14	18	11		22	27	14	1.3355
Histone H3.1t	HIST3H3	H31T_HUMAN	0	0	0		0	2	0	1.33333
Glucose-6-phosphate translocase	SLC37A4	G6PT1_HUMAN	0	0	0		0	2	0	1.33333
Kinesin-like protein KIF11	KIF11	KIF11_HUMAN	0	0	0		0	2	0	1.33333
Tyrosine-protein kinase BAZ1B	BAZ1B	BAZ1B_HUMAN	0	0	0		0	2	0	1.33333
Leucine-rich repeat-containing protein 59	LRRC59	LRC59_HUMAN	0	0	0		0	2	0	1.33333
Pyruvate dehydrogenase protein X component, mitochondrial	PDHX	ODPX_HUMAN	0	0	0		0	2	0	1.33333
Zinc finger CCHC domain-containing protein 8	ZCCHC8	ZCHC8_HUMAN	0	0	0		0	2	0	1.33333
Guanine nucleotide-binding protein G(i) subunit alpha-2	GNAI2	GNAI2_HUMAN	0	0	0		0	2	0	1.33333
Mitochondrial carrier homolog 2	MTCH2	MTCH2_HUMAN	0	0	0		0	2	0	1.33333
N-acetylserotonin O-methyltransferase-like protein	ASMTL	ASML_HUMAN	0	0	0		0	2	0	1.33333
Actin-related protein 3	ACTR3	ARP3_HUMAN	0	0	0		0	2	0	1.33333
FERM, RhoGEF and pleckstrin domain-containing protein 1	FARP1	FARP1_HUMAN	0	0	0		0	2	0	1.33333
Nuclear valosin-containing protein-like	NVL	NVL_HUMAN	0	0	0		0	2	0	1.33333
Spermatogenesis-associated protein 5	SPATA5	SPAT5_HUMAN	0	0	0		0	2	0	1.33333
Cytoplasmic FMR1-interacting protein 1	CYFIP1	CYFP1_HUMAN	13	10	11		16	22	13	1.33212
Glycogen phosphorylase, liver form	PYGL	PYGL_HUMAN	18	12	6		11	17	21	1.33043
60 kDa heat shock protein, mitochondrial	HSPD1	CH60_HUMAN	29	40	26		48	51	39	1.32774
RNA-binding protein 28	RBM28	RBM28_HUMAN	0	3	3		3	5	3	1.32651
Probable leucine--tRNA ligase, mitochondrial	LARS2	SYLM_HUMAN	4	3	0		2	4	4	1.32625
Importin-5	IPO5	IPO5_HUMAN	14	13	11		12	21	22	1.32336
Probable ATP-dependent RNA helicase DDX5	DDX5	DDX5_HUMAN	63	77	63		105	98	93	1.32097
Voltage-dependent anion-selective channel protein 3	VDAC3	VDAC3_HUMAN	27	32	26		10	76	42	1.32019
Nuclear pore complex protein Nup85	NUP85	NUP85_HUMAN	7	11	7		13	12	11	1.31939
Plakophilin-2	PKP2	PKP2_HUMAN	4	0	3		8	3	0	1.31837
28S ribosomal protein S9, mitochondrial	MRPS9	RT09_HUMAN	14	10	9		15	16	16	1.31756
Short/branched chain specific acyl-CoA dehydrogenase, mitochondrial	ACADSB	ACDSB_HUMAN	7	9	10		13	13	13	1.3156
Alpha-internexin	INA	AINX_HUMAN	10	23	13		22	27	18	1.31475
Mitochondrial import inner membrane translocase subunit TIM50	TIMM50	TIM50_HUMAN	14	19	18		25	23	27	1.31401
Tricarboxylate transport protein, mitochondrial	SLC25A1	TXTP_HUMAN	24	28	29		21	48	51	1.31023
GTP-binding protein 10	GTPBP10	GTPBA_HUMAN	4	0	0		0	0	5	1.30989
Coatomer subunit gamma-1	COPG1	COPG1_HUMAN	26	17	6		25	24	16	1.30823
mRNA export factor	RAE1	RAE1L_HUMAN	12	13	0		9	16	8	1.30821
Nuclear mitotic apparatus protein 1	NUMA1	NUMA1_HUMAN	63	49	31		79	68	51	1.30767
60S ribosomal protein L23a	RPL23A	RL23A_HUMAN	11	7	5		15	6	10	1.30476
Glomulin	GLMN	GLMN_HUMAN	0	0	3		2	3	3	1.30287
Flap endonuclease 1	FEN1	FEN1_HUMAN	5	3	0		3	4	4	1.30221
Transmembrane protein 201	TMEM201	TM201_HUMAN	3	5	6		7	6	8	1.30093
39S ribosomal protein L19, mitochondrial	MRPL19	RM19_HUMAN	4	7	8		0	19	10	1.30046
Double-stranded RNA-specific adenosine deaminase	ADAR	DSRAD_HUMAN	3	7	0		5	7	2	1.2965
Myb-binding protein 1A	MYBBP1A	MBB1A_HUMAN	37	21	28		32	38	52	1.29372
Splicing factor 3B subunit 1	SF3B1	SF3B1_HUMAN	20	15	18		24	18	33	1.29337
Matrin-3	MATR3	MATR3_HUMAN	27	18	13		25	32	23	1.29185
Cell cycle and apoptosis regulator protein 2	CCAR2	CCAR2_HUMAN	7	3	4		7	9	4	1.28817
26S protease regulatory subunit 4	PSMC1	PRS4_HUMAN	9	17	11		21	20	12	1.28741
NF-kappa-B-repressing factor	NKRF	NKRF_HUMAN	7	10	7		9	13	12	1.28687
Heat shock protein HSP 90-beta	HSP90AB1	HS90B_HUMAN	160	157	89		171	201	182	1.28669
Guanine nucleotide-binding protein subunit beta-2-like 1	GNB2L1	GBLP_HUMAN	20	22	19		28	26	32	1.28644
Pyruvate kinase PKM	PKM	KPYM_HUMAN	94	94	47		122	131	68	1.28329
Kinetochore-associated protein 1	KNTC1	KNTC1_HUMAN	8	8	4		9	10	8	1.28084
40S ribosomal protein S8	RPS8	RS8_HUMAN	34	38	22		63	25	38	1.27981
Tubulin alpha-1B chain	TUBA1B	TBA1B_HUMAN	207	188	75		217	266	145	1.27964
Phosphoenolpyruvate carboxykinase [GTP], mitochondrial	PCK2	PCKGM_HUMAN	32	24	12		44	28	18	1.27624
SURP and G-patch domain-containing protein 2	SUGP2	SUGP2_HUMAN	10	7	8		10	11	14	1.27609
Importin-4	IPO4	IPO4_HUMAN	19	10	11		15	26	15	1.2696
CCAAT/enhancer-binding protein zeta	CEBPZ	CEBPZ_HUMAN	6	0	0		4	0	4	1.26951
Protein transport protein Sec61 subunit alpha isoform 1	SEC61A1	S61A1_HUMAN	15	18	19		27	21	26	1.26876
Nucleolar MIF4G domain-containing protein 1	NOM1	NOM1_HUMAN	4	4	3		3	5	7	1.26861
Tyrosine--tRNA ligase, cytoplasmic	YARS	SYYC_HUMAN	8	24	18		21	32	20	1.26642
ATP synthase subunit beta, mitochondrial	ATP5B	ATPB_HUMAN	78	68	48		84	102	79	1.26628
Unconventional myosin-Id	MYO1D	MYO1D_HUMAN	7	0	3		5	6	4	1.26439
Beta-galactosidase	GLB1	BGAL_HUMAN	14	19	7		19	26	9	1.26436
Polymerase delta-interacting protein 2	POLDIP2	PDIP2_HUMAN	6	6	10		8	14	11	1.26274
Protein RFT1 homolog	RFT1	RFT1_HUMAN	12	7	0		8	10	6	1.25764
Cullin-associated NEDD8-dissociated protein 1	CAND1	CAND1_HUMAN	42	40	28		40	62	48	1.25583
Cellular tumor antigen p53	TP53	P53_HUMAN	10	11	11		13	16	16	1.25466
Serine/threonine-protein kinase Nek7	NEK7	NEK7_HUMAN	5	0	0		0	7	0	1.25141
Non-POU domain-containing octamer-binding protein	NONO	NONO_HUMAN	19	27	25		29	35	36	1.25135
Exportin-2	CSE1L	XPO2_HUMAN	35	43	25		35	52	51	1.24799
Guanine nucleotide-binding protein G(s) subunit alpha isoforms short	GNAS	GNAS2_HUMAN	14	12	0		7	8	16	1.24159
Alanine--tRNA ligase, mitochondrial	AARS2	SYAM_HUMAN	8	5	10		12	10	11	1.24091
60S ribosomal protein L15	RPL15	RL15_HUMAN	18	15	9		19	19	17	1.24079
Isoleucine--tRNA ligase, mitochondrial	IARS2	SYIM_HUMAN	9	11	0		6	11	8	1.23914
60S ribosomal protein L7a	RPL7A	RL7A_HUMAN	56	64	53		29	134	80	1.23875
40S ribosomal protein S3	RPS3	RS3_HUMAN	98	105	74		78	180	120	1.2376
Probable methyltransferase-like protein 15	METTL15	MET15_HUMAN	4	3	3		6	0	6	1.23708
TATA-binding protein-associated factor 172	BTAF1	BTAF1_HUMAN	6	4	6		8	11	4	1.23485
Ig kappa chain V-II region RPMI 6410		KV206_HUMAN	59	63	50		80	77	75	1.23444
Insulin-like growth factor 2 mRNA-binding protein 1	IGF2BP1	IF2B1_HUMAN	68	83	43		96	96	64	1.2334
Signal recognition particle subunit SRP68	SRP68	SRP68_HUMAN	10	11	6		13	10	12	1.23318
39S ribosomal protein L1, mitochondrial	MRPL1	RM01_HUMAN	6	5	0		5	5	4	1.23299
Unhealthy ribosome biogenesis protein 2 homolog	URB2	URB2_HUMAN	3	0	0		2	3	0	1.23165
Anaphase-promoting complex subunit 1	ANAPC1	APC1_HUMAN	11	4	5		10	8	8	1.22383
Ribose-phosphate pyrophosphokinase 2	PRPS2	PRPS2_HUMAN	0	4	4		4	5	4	1.22288
Cytochrome c oxidase assembly protein COX15 homolog	COX15	COX15_HUMAN	0	4	4		4	5	4	1.22288
Heterogeneous nuclear ribonucleoprotein D0	HNRNPD	HNRPD_HUMAN	16	14	0		14	13	9	1.22009
28S ribosomal protein S29, mitochondrial	DAP3	RT29_HUMAN	16	15	16		21	22	21	1.21796
Exosome complex component RRP43	EXOSC8	EXOS8_HUMAN	7	5	0		4	6	5	1.21704
Tubulin beta chain	TUBB	TBB5_HUMAN	313	325	167		330	398	310	1.21672
Bifunctional methylenetetrahydrofolate dehydrogenase/cyclohydrolase, mitochondrial	MTHFD2	MTDC_HUMAN	8	6	11		14	9	12	1.21507
Proteasome subunit alpha type-4	PSMA4	PSA4_HUMAN	13	13	17		23	9	26	1.21474
Phosphoglycerate mutase 1	PGAM1	PGAM1_HUMAN	3	5	3		8	0	5	1.21395
Glutaminyl-peptide cyclotransferase-like protein	QPCTL	QPCTL_HUMAN	28	20	16		23	35	26	1.2125
Dolichyl-diphosphooligosaccharide--protein glycosyltransferase 48 kDa subunit	DDOST	OST48_HUMAN	8	9	6		9	10	11	1.2124
NADH dehydrogenase [ubiquinone] 1 alpha subcomplex subunit 9, mitochondrial	NDUFA9	NDUA9_HUMAN	12	14	12		15	18	18	1.2123
Tubulin beta-4B chain	TUBB4B	TBB4B_HUMAN	41	42	29		47	60	41	1.21225
Trifunctional enzyme subunit alpha, mitochondrial	HADHA	ECHA_HUMAN	23	27	8		23	27	22	1.21184
Histone deacetylase 1	HDAC1	HDAC1_HUMAN	0	7	6		6	8	6	1.21117
28S ribosomal protein S18b, mitochondrial	MRPS18B	RT18B_HUMAN	8	13	7		10	16	11	1.21029
Cyclin-dependent-like kinase 5	CDK5	CDK5_HUMAN	3	4	4		0	11	4	1.20948
Vacuolar protein sorting-associated protein 35	VPS35	VPS35_HUMAN	8	6	6		7	7	12	1.2065
Very-long-chain enoyl-CoA reductase	TECR	TECR_HUMAN	4	5	0		6	0	4	1.20562
Arginine--tRNA ligase, cytoplasmic	RARS	SYRC_HUMAN	38	33	14		37	51	20	1.20307
CTP synthase 1	CTPS1	PYRG1_HUMAN	36	35	21		39	43	36	1.20255
60S ribosomal protein L10a	RPL10A	RL10A_HUMAN	25	27	17		49	14	24	1.20149
Pyrroline-5-carboxylate reductase 1, mitochondrial	PYCR1	P5CR1_HUMAN	25	24	17		27	29	29	1.19731
Monocarboxylate transporter 1	SLC16A1	MOT1_HUMAN	8	9	6		6	13	11	1.1962
Coatomer subunit beta'	COPB2	COPB2_HUMAN	6	4	5		4	8	8	1.19457
L-lactate dehydrogenase A chain	LDHA	LDHA_HUMAN	107	100	87		123	132	129	1.1925
RNA binding protein fox-1 homolog 2	RBFOX2	RFOX2_HUMAN	0	5	0		0	3	4	1.19239
Exosome complex component MTR3	EXOSC6	EXOS6_HUMAN	6	14	11		0	30	13	1.19204
cAMP-dependent protein kinase catalytic subunit beta	PRKACB	KAPCB_HUMAN	5	0	6		3	7	7	1.19013
ATP-dependent RNA helicase DDX51	DDX51	DDX51_HUMAN	4	4	4		6	6	4	1.18571
N-acetyltransferase 10	NAT10	NAT10_HUMAN	9	9	7		13	15	5	1.183
Transferrin receptor protein 1	TFRC	TFR1_HUMAN	7	4	0		6	7	0	1.18206
Mitochondrial dicarboxylate carrier	SLC25A10	DIC_HUMAN	20	23	22		56	5	22	1.18113
Aspartate aminotransferase, mitochondrial	GOT2	AATM_HUMAN	8	7	6		6	10	11	1.18034
Eukaryotic initiation factor 4A-I	EIF4A1	IF4A1_HUMAN	40	35	17		38	45	31	1.17999
U1 small nuclear ribonucleoprotein 70 kDa	SNRNP70	RU17_HUMAN	0	0	3		3	0	3	1.17895
Armadillo repeat-containing protein 6	ARMC6	ARMC6_HUMAN	0	4	0		3	3	0	1.17573
RNA-binding protein 39	RBM39	RBM39_HUMAN	11	6	5		14	6	7	1.1752
Stress-70 protein, mitochondrial	HSPA9	GRP75_HUMAN	48	53	41		67	66	50	1.17241
Nuclease-sensitive element-binding protein 1	YBX1	YBOX1_HUMAN	15	20	11		14	23	21	1.17212
Importin-11	IPO11	IPO11_HUMAN	4	3	0		0	4	4	1.1716
Hermansky-Pudlak syndrome 6 protein	HPS6	HPS6_HUMAN	5	5	4		5	7	6	1.17152
RNA-binding protein 14	RBM14	RBM14_HUMAN	30	29	22		31	38	34	1.16939
Peroxisomal membrane protein PEX16	PEX16	PEX16_HUMAN	0	0	3		0	6	0	1.16636
X-ray repair cross-complementing protein 6	XRCC6	XRCC6_HUMAN	22	24	17		24	31	25	1.16368
116 kDa U5 small nuclear ribonucleoprotein component	EFTUD2	U5S1_HUMAN	12	11	5		14	12	8	1.16355
Nucleolar GTP-binding protein 1	GTPBP4	NOG1_HUMAN	13	12	6		12	15	11	1.16305
Dehydrogenase/reductase SDR family member 7B	DHRS7B	DRS7B_HUMAN	7	19	9		4	29	13	1.16288
CTP synthase 2	CTPS2	PYRG2_HUMAN	8	10	0		6	8	7	1.16063
Ataxin-10	ATXN10	ATX10_HUMAN	6	5	4		5	8	6	1.15958
Pachytene checkpoint protein 2 homolog	TRIP13	PCH2_HUMAN	12	13	6		14	15	9	1.15816
T-complex protein 1 subunit alpha	TCP1	TCPA_HUMAN	80	96	72		107	119	90	1.15597
Regulator of nonsense transcripts 1	UPF1	RENT1_HUMAN	0	6	6		7	7	4	1.15537
Elongation factor 1-alpha 1	EEF1A1	EF1A1_HUMAN	142	139	114		158	176	163	1.15015
Mediator of DNA damage checkpoint protein 1	MDC1	MDC1_HUMAN	6	0	0		3	5	0	1.14821
26S proteasome non-ATPase regulatory subunit 4	PSMD4	PSMD4_HUMAN	24	16	15		24	27	18	1.14807
Voltage-dependent anion-selective channel protein 2	VDAC2	VDAC2_HUMAN	35	35	16		31	38	34	1.1463
ATP-dependent RNA helicase A	DHX9	DHX9_HUMAN	84	79	70		92	103	98	1.14442
Nucleolin	NCL	NUCL_HUMAN	103	77	52		112	93	76	1.14297
Polymerase delta-interacting protein 3	POLDIP3	PDIP3_HUMAN	0	3	0		0	4	0	1.14233
TP53-regulating kinase	TP53RK	PRPK_HUMAN	8	7	2		0	16	4	1.14178
Very-long-chain 3-oxoacyl-CoA reductase	HSD17B12	DHB12_HUMAN	17	21	3		6	35	8	1.13955
Dolichyl-phosphate beta-glucosyltransferase	ALG5	ALG5_HUMAN	7	0	7		7	7	6	1.13855
Eukaryotic translation initiation factor 2 subunit 1	EIF2S1	IF2A_HUMAN	5	4	6		8	3	8	1.13772
Chromodomain-helicase-DNA-binding protein 4	CHD4	CHD4_HUMAN	4	0	0		0	5	0	1.13756
Poly(rC)-binding protein 1	PCBP1	PCBP1_HUMAN	30	29	22		26	39	35	1.13337
26S protease regulatory subunit 6A	PSMC3	PRS6A_HUMAN	17	16	2		17	14	8	1.131
Adenylosuccinate synthetase isozyme 2	ADSS	PURA2_HUMAN	5	4	0		6	4	0	1.13028
Enoyl-CoA hydratase, mitochondrial	ECHS1	ECHM_HUMAN	0	0	3		5	0	0	1.12993
Zinc finger protein 768	ZNF768	ZN768_HUMAN	6	3	6		8	4	7	1.12938
Lamin-B2	LMNB2	LMNB2_HUMAN	37	39	27		34	48	44	1.12859
Eukaryotic translation initiation factor 3 subunit E	EIF3E	EIF3E_HUMAN	34	33	26		35	39	40	1.12847
60S ribosomal protein L7	RPL7	RL7_HUMAN	45	45	41		93	11	53	1.12521
Hornerin	HRNR	HORN_HUMAN	58	22	20		55	29	32	1.12508
Pyridoxal phosphate phosphatase	PDXP	PLPP_HUMAN	3	0	3		3	3	3	1.12394
60S ribosomal protein L8	RPL8	RL8_HUMAN	62	67	49		53	90	76	1.12335
Ran GTPase-activating protein 1	RANGAP1	RAGP1_HUMAN	7	13	9		15	11	10	1.12332
Heat shock protein 75 kDa, mitochondrial	TRAP1	TRAP1_HUMAN	17	14	5		16	13	12	1.12258
Replication factor C subunit 1	RFC1	RFC1_HUMAN	6	2	4		0	6	8	1.12231
L-lactate dehydrogenase B chain	LDHB	LDHB_HUMAN	81	89	78		92	117	100	1.12081
Ribosome production factor 2 homolog	RPF2	RPF2_HUMAN	5	5	5		6	8	5	1.12024
Pyrroline-5-carboxylate reductase 2	PYCR2	P5CR2_HUMAN	51	49	27		41	73	39	1.11756
S1 RNA-binding domain-containing protein 1	SRBD1	SRBD1_HUMAN	4	4	0		4	5	0	1.11697
Probable tRNA pseudouridine synthase 1	TRUB1	TRUB1_HUMAN	0	0	5		0	3	6	1.11629
Dimethyladenosine transferase 1, mitochondrial	TFB1M	TFB1M_HUMAN	10	4	3		0	16	4	1.11589
GDP-mannose 4,6 dehydratase	GMDS	GMDS_HUMAN	6	0	5		4	4	7	1.11457
Putative ATP-dependent RNA helicase DHX33	DHX33	DHX33_HUMAN	0	0	3		0	3	3	1.11333
DBIRD complex subunit ZNF326	ZNF326	ZN326_HUMAN	9	10	5		9	9	10	1.11264
60S ribosomal protein L5	RPL5	RL5_HUMAN	72	78	49		67	113	62	1.11107
Ribonuclease P protein subunit p38	RPP38	RPP38_HUMAN	7	7	14		11	12	14	1.10889
Eukaryotic translation initiation factor 3 subunit L	EIF3L	EIF3L_HUMAN	26	39	21		40	38	25	1.1066
Nuclear pore membrane glycoprotein 210	NUP210	PO210_HUMAN	0	4	0		0	5	0	1.1047
Serine racemase	SRR	SRR_HUMAN	0	4	0		0	5	0	1.1047
Heterogeneous nuclear ribonucleoprotein U-like protein 1	HNRNPUL1	HNRL1_HUMAN	37	36	20		39	35	34	1.10215
TATA-binding protein-associated factor 2N	TAF15	RBP56_HUMAN	5	8	7		7	10	8	1.10096
Coatomer subunit delta	ARCN1	COPD_HUMAN	5	17	12		16	18	9	1.09873
Anaphase-promoting complex subunit 7	ANAPC7	APC7_HUMAN	5	14	10		12	13	11	1.09755
Probable arginine--tRNA ligase, mitochondrial	RARS2	SYRM_HUMAN	0	6	8		5	7	8	1.097
Deoxynucleoside triphosphate triphosphohydrolase SAMHD1	SAMHD1	SAMH1_HUMAN	7	10	9		10	11	11	1.09626
COBW domain-containing protein 1	CBWD1	CBWD1_HUMAN	3	5	0		3	6	0	1.09588
Serpin H1	SERPINH1	SERPH_HUMAN	19	16	11		19	20	15	1.09364
Replication factor C subunit 2	RFC2	RFC2_HUMAN	10	11	9		9	19	9	1.09144
C-terminal-binding protein 1	CTBP1	CTBP1_HUMAN	5	7	5		0	6	13	1.08995
Transportin-1	TNPO1	TNPO1_HUMAN	11	8	7		10	13	8	1.08794
DNA replication licensing factor MCM3	MCM3	MCM3_HUMAN	15	11	16		18	18	16	1.08758
PHD finger protein 6	PHF6	PHF6_HUMAN	2	4	2		0	0	7	1.0862
KRR1 small subunit processome component homolog	KRR1	KRR1_HUMAN	11	11	4		8	11	10	1.08364
Probable ATP-dependent RNA helicase DDX23	DDX23	DDX23_HUMAN	2	3	0		0	0	4	1.08203
Cell division cycle protein 23 homolog	CDC23	CDC23_HUMAN	0	4	7		5	5	6	1.08088
4F2 cell-surface antigen heavy chain	SLC3A2	4F2_HUMAN	7	11	8		8	11	12	1.08068
Golgi-specific brefeldin A-resistance guanine nucleotide exchange factor 1	GBF1	GBF1_HUMAN	8	8	5		12	6	6	1.07953
Lupus La protein	SSB	LA_HUMAN	9	11	5		9	14	6	1.07673
Putative ATP-dependent RNA helicase DHX30	DHX30	DHX30_HUMAN	37	30	33		38	49	34	1.07653
Bromodomain adjacent to zinc finger domain protein 1A	BAZ1A	BAZ1A_HUMAN	6	2	4		6	3	5	1.07283
ATP-citrate synthase	ACLY	ACLY_HUMAN	108	96	52		85	113	92	1.07263
Guanine nucleotide-binding protein G(I)/G(S)/G(T) subunit beta-2	GNB2	GBB2_HUMAN	9	8	3		7	8	7	1.07244
Poly(A) RNA polymerase, mitochondrial	MTPAP	PAPD1_HUMAN	0	6	5		3	6	6	1.07175
Acyl-CoA dehydrogenase family member 9, mitochondrial	ACAD9	ACAD9_HUMAN	0	6	7		6	6	6	1.0706
Coiled-coil domain-containing protein 137	CCDC137	CC137_HUMAN	7	0	3		5	0	6	1.06818
Methylthioribose-1-phosphate isomerase	MRI1	MTNA_HUMAN	10	9	10		11	14	10	1.06697
Staphylococcal nuclease domain-containing protein 1	SND1	SND1_HUMAN	3	0	0		3	0	0	1.06548
Bystin	BYSL	BYST_HUMAN	3	0	0		3	0	0	1.06548
Dermcidin	DCD	DCD_HUMAN	26	27	0		19	16	19	1.06305
Histone H1x	H1FX	H1X_HUMAN	18	26	25		19	31	33	1.06272
Anaphase-promoting complex subunit 5	ANAPC5	APC5_HUMAN	0	2	0		0	0	2	1.06139
T-complex protein 1 subunit zeta	CCT6A	TCPZ_HUMAN	45	51	44		50	63	52	1.05914
Cullin-associated NEDD8-dissociated protein 2	CAND2	CAND2_HUMAN	4	3	4		4	4	5	1.05589
Probable rRNA-processing protein EBP2	EBNA1BP2	EBP2_HUMAN	7	4	6		4	7	9	1.05561
Serine/threonine-protein kinase mTOR	MTOR	MTOR_HUMAN	14	13	5		11	14	10	1.05559
Thyroid transcription factor 1-associated protein 26	CCDC59	TAP26_HUMAN	0	3	3		4	4	0	1.05364
Insulin receptor substrate 4	IRS4	IRS4_HUMAN	11	11	17		7	14	26	1.05273
Elongation factor 1-delta	EEF1D	EF1D_HUMAN	8	7	5		8	5	9	1.04646
Lamin-B1	LMNB1	LMNB1_HUMAN	113	107	54		98	109	94	1.04625
Insulin-like growth factor 2 mRNA-binding protein 3	IGF2BP3	IF2B3_HUMAN	13	15	10		14	15	14	1.04596
Heterogeneous nuclear ribonucleoprotein M	HNRNPM	HNRPM_HUMAN	327	361	237		346	399	304	1.04539
Ribose-phosphate pyrophosphokinase 1	PRPS1	PRPS1_HUMAN	15	14	8		14	15	12	1.04426
General vesicular transport factor p115	USO1	USO1_HUMAN	5	6	4		6	6	5	1.04321
Mitochondrial glutamate carrier 1	SLC25A22	GHC1_HUMAN	17	20	13		18	24	15	1.04125
Calcium-binding mitochondrial carrier protein Aralar2	SLC25A13	CMC2_HUMAN	40	42	26		40	46	35	1.0406
GPI transamidase component PIG-T	PIGT	PIGT_HUMAN	0	4	4		0	4	6	1.03871
N-alpha-acetyltransferase 15, NatA auxiliary subunit	NAA15	NAA15_HUMAN	23	24	20		15	27	34	1.03848
CAD protein	CAD	PYR1_HUMAN	84	75	29		73	84	46	1.03807
Sentrin-specific protease 3	SENP3	SENP3_HUMAN	6	4	6		8	7	4	1.03765
ATP-binding cassette sub-family B member 10, mitochondrial	ABCB10	ABCBA_HUMAN	0	3	0		3	0	0	1.03763
Zinc finger CCCH domain-containing protein 18	ZC3H18	ZCH18_HUMAN	4	2	4		0	5	6	1.03688
Pre-mRNA-processing factor 6	PRPF6	PRP6_HUMAN	24	20	14		22	27	16	1.03486
Serine/threonine-protein phosphatase PP1-gamma catalytic subunit	PPP1CC	PP1G_HUMAN	0	0	5		4	0	4	1.03468
Integrator complex subunit 1	INTS1	INT1_HUMAN	13	9	8		16	13	5	1.03445
Ribonucleases P/MRP protein subunit POP1	POP1	POP1_HUMAN	3	5	0		0	4	4	1.03278
Sideroflexin-4	SFXN4	SFXN4_HUMAN	6	12	15		13	13	14	1.03181
Pyrroline-5-carboxylate reductase 3	PYCRL	P5CR3_HUMAN	10	12	10		22	0	12	1.03172
Actin, cytoplasmic 1	ACTB	ACTB_HUMAN	188	193	123		177	230	155	1.02942
Electron transfer flavoprotein subunit alpha, mitochondrial	ETFA	ETFA_HUMAN	19	17	12		14	25	15	1.02928
DNA replication licensing factor MCM7	MCM7	MCM7_HUMAN	56	53	39		53	66	47	1.02878
Fatty acid synthase	FASN	FAS_HUMAN	43	33	0		31	25	19	1.02768
ATP-binding cassette sub-family D member 3	ABCD3	ABCD3_HUMAN	14	8	7		9	13	10	1.02672
E3 UFM1-protein ligase 1	UFL1	UFL1_HUMAN	12	8	5		7	11	9	1.02487
Isocitrate dehydrogenase [NAD] subunit alpha, mitochondrial	IDH3A	IDH3A_HUMAN	22	20	13		23	14	22	1.02339
T-complex protein 1 subunit gamma	CCT3	TCPG_HUMAN	51	62	50		62	69	54	1.02286
Long-chain-fatty-acid--CoA ligase 3	ACSL3	ACSL3_HUMAN	7	8	7		8	9	8	1.02264
Serine-threonine kinase receptor-associated protein	STRAP	STRAP_HUMAN	6	7	4		7	3	8	1.02212
Sarcoplasmic/endoplasmic reticulum calcium ATPase 2	ATP2A2	AT2A2_HUMAN	25	20	13		25	16	21	1.02193
SRSF protein kinase 1	SRPK1	SRPK1_HUMAN	5	0	5		5	4	4	1.02158
Adenylate kinase 4, mitochondrial	AK4	KAD4_HUMAN	4	6	4		8	0	6	1.01959
Dihydropyrimidinase-related protein 4	DPYSL4	DPYL4_HUMAN	0	0	4		0	4	3	1.0186
40S ribosomal protein S3a	RPS3A	RS3A_HUMAN	104	103	80		96	125	99	1.01767
26S proteasome non-ATPase regulatory subunit 3	PSMD3	PSMD3_HUMAN	43	55	34		49	56	41	1.01695
Nuclear pore complex protein Nup107	NUP107	NU107_HUMAN	8	8	5		8	9	6	1.01572
Nucleolar protein 58	NOP58	NOP58_HUMAN	19	29	23		29	31	21	1.01565
Structural maintenance of chromosomes protein 3	SMC3	SMC3_HUMAN	13	12	12		12	17	13	1.01334
60S ribosomal protein L19	RPL19	RL19_HUMAN	20	14	5		16	14	10	1.01084
Heterogeneous nuclear ribonucleoprotein Q	SYNCRIP	HNRPQ_HUMAN	16	11	7		13	12	11	1.01019
Probable ATP-dependent RNA helicase DDX28	DDX28	DDX28_HUMAN	9	20	13		13	17	17	1.00907
Heterogeneous nuclear ribonucleoprotein F	HNRNPF	HNRPF_HUMAN	12	15	9		10	14	15	1.00883
Protein lin-28 homolog B	LIN28B	LN28B_HUMAN	5	4	3		3	5	5	1.00856
ATP-dependent RNA helicase DDX1	DDX1	DDX1_HUMAN	4	0	4		3	0	6	1.00778
Translation initiation factor eIF-2B subunit beta	EIF2B2	EI2BB_HUMAN	6	5	6		7	5	7	1.00776
Far upstream element-binding protein 2	KHSRP	FUBP2_HUMAN	8	8	6		8	8	8	1.00745
40S ribosomal protein S6	RPS6	RS6_HUMAN	60	54	33		36	82	43	1.00703
Heat shock protein HSP 90-alpha	HSP90AA1	HS90A_HUMAN	19	20	13		16	19	21	1.00619
ATPase family AAA domain-containing protein 3A	ATAD3A	ATD3A_HUMAN	63	78	58		69	80	71	1.00611
General transcription factor 3C polypeptide 5	GTF3C5	TF3C5_HUMAN	0	9	11		7	11	8	1.00607
Malectin	MLEC	MLEC_HUMAN	3	5	3		4	4	4	1.00401
Probable ATP-dependent RNA helicase DDX20	DDX20	DDX20_HUMAN	5	4	6		4	5	8	1.00262
26S protease regulatory subunit 7	PSMC2	PRS7_HUMAN	26	31	14		24	28	23	1.00237
Replication factor C subunit 4	RFC4	RFC4_HUMAN	12	13	17		16	20	13	1.00128
Cyclin-dependent kinase 2	CDK2	CDK2_HUMAN	10	15	4		9	13	8	0.99766
Dynamin-2	DNM2	DYN2_HUMAN	10	9	9		10	11	10	0.997213
Phenylalanine--tRNA ligase beta subunit	FARSB	SYFB_HUMAN	13	15	7		8	16	13	0.996565
Serine/threonine-protein phosphatase PGAM5, mitochondrial	PGAM5	PGAM5_HUMAN	15	25	14		17	20	21	0.994646
39S ribosomal protein L45, mitochondrial	MRPL45	RM45_HUMAN	0	4	0		2	3	0	0.994241
Protein DEK	DEK	DEK_HUMAN	9	12	7		9	11	10	0.993426
Dihydropyrimidinase-related protein 1	CRMP1	DPYL1_HUMAN	0	6	7		4	8	5	0.99035
Aminoacyl tRNA synthase complex-interacting multifunctional protein 1	AIMP1	AIMP1_HUMAN	12	17	15		13	19	17	0.988588
Dynein assembly factor 5, axonemal	DNAAF5	DAAF5_HUMAN	15	12	7		14	11	10	0.982424
Asparagine synthetase [glutamine-hydrolyzing]	ASNS	ASNS_HUMAN	9	20	13		16	17	13	0.98222
Splicing factor, proline- and glutamine-rich	SFPQ	SFPQ_HUMAN	11	12	11		10	13	14	0.981574
Splicing factor U2AF 65 kDa subunit	U2AF2	U2AF2_HUMAN	13	16	8		18	15	6	0.981066
Nucleolar complex protein 3 homolog	NOC3L	NOC3L_HUMAN	13	11	6		9	12	10	0.9809
Glutamine--tRNA ligase	QARS	SYQ_HUMAN	15	13	10		13	13	14	0.979366
5'-3' exoribonuclease 2	XRN2	XRN2_HUMAN	13	8	0		5	6	9	0.977856
Glycerol-3-phosphate dehydrogenase 1-like protein	GPD1L	GPD1L_HUMAN	0	0	5		3	4	2	0.977818
MKI67 FHA domain-interacting nucleolar phosphoprotein	NIFK	MK67I_HUMAN	3	0	0		0	3	0	0.97749
Leucine-rich repeat-containing protein 47	LRRC47	LRC47_HUMAN	3	0	0		0	3	0	0.97749
ATP-binding cassette sub-family B member 7, mitochondrial	ABCB7	ABCB7_HUMAN	3	0	0		0	3	0	0.97749
NADH-cytochrome b5 reductase 3	CYB5R3	NB5R3_HUMAN	3	0	0		0	3	0	0.97749
Protein FRG1	FRG1	FRG1_HUMAN	3	0	0		0	3	0	0.97749
Zinc finger protein 512	ZNF512	ZN512_HUMAN	8	8	5		9	8	5	0.973375
Protein VAC14 homolog	VAC14	VAC14_HUMAN	5	0	0		0	5	0	0.973317
DnaJ homolog subfamily C member 11	DNAJC11	DJC11_HUMAN	11	18	6		8	17	11	0.972418
ATP synthase subunit gamma, mitochondrial	ATP5C1	ATPG_HUMAN	34	31	16		19	46	20	0.971155
60S ribosomal protein L24	RPL24	RL24_HUMAN	79	43	27		62	45	42	0.970001
Zinc finger protein 346	ZNF346	ZN346_HUMAN	4	6	4		5	6	4	0.968579
DnaJ homolog subfamily A member 1	DNAJA1	DNJA1_HUMAN	10	9	8		8	13	8	0.963704
Succinyl-CoA ligase [ADP/GDP-forming] subunit alpha, mitochondrial	SUCLG1	SUCA_HUMAN	33	35	23		25	44	27	0.963584
Transducin beta-like protein 3	TBL3	TBL3_HUMAN	8	8	0		6	8	2	0.963526
40S ribosomal protein SA	RPSA	RSSA_HUMAN	11	12	14		12	17	12	0.962605
60S ribosomal protein L13	RPL13	RL13_HUMAN	76	69	66		97	47	76	0.961829
Magnesium transporter protein 1	MAGT1	MAGT1_HUMAN	4	7	4		4	8	4	0.957597
Heterogeneous nuclear ribonucleoprotein A3	HNRNPA3	ROA3_HUMAN	13	13	14		14	15	14	0.95627
N-alpha-acetyltransferase 10	NAA10	NAA10_HUMAN	8	8	8		9	11	6	0.956089
Syntaxin-18	STX18	STX18_HUMAN	3	4	0		0	0	5	0.953709
Solute carrier family 25 member 40	SLC25A40	S2540_HUMAN	0	3	0		0	3	0	0.951945
General transcription factor 3C polypeptide 2	GTF3C2	TF3C2_HUMAN	0	3	0		0	3	0	0.951945
Methionine--tRNA ligase, mitochondrial	MARS2	SYMM_HUMAN	0	3	0		0	3	0	0.951945
26S protease regulatory subunit 6B	PSMC4	PRS6B_HUMAN	18	17	13		17	20	13	0.950684
Protein NipSnap homolog 1	NIPSNAP1	NIPS1_HUMAN	4	5	0		7	0	0	0.950442
MICOS complex subunit MIC60	IMMT	MIC60_HUMAN	30	20	12		19	20	22	0.948062
T-complex protein 1 subunit theta	CCT8	TCPQ_HUMAN	5	11	11		8	13	9	0.947771
Surfeit locus protein 6	SURF6	SURF6_HUMAN	0	4	0		0	4	0	0.946889
7-dehydrocholesterol reductase	DHCR7	DHCR7_HUMAN	13	14	9		7	11	18	0.944839
UAP56-interacting factor	FYTTD1	UIF_HUMAN	14	13	10		12	14	12	0.944627
Charged multivesicular body protein 4b	CHMP4B	CHM4B_HUMAN	7	5	6		7	7	5	0.942133
DNA polymerase epsilon catalytic subunit A	POLE	DPOE1_HUMAN	13	10	0		9	5	7	0.94059
Phosphate carrier protein, mitochondrial	SLC25A3	MPCP_HUMAN	66	79	58		64	83	63	0.938915
39S ribosomal protein L15, mitochondrial	MRPL15	RM15_HUMAN	21	22	11		18	17	18	0.937689
ATP-dependent RNA helicase DDX50	DDX50	DDX50_HUMAN	28	24	10		20	28	13	0.936418
Mitochondrial inner membrane protein OXA1L	OXA1L	OXA1L_HUMAN	9	18	8		10	13	12	0.933717
Eukaryotic translation initiation factor 4 gamma 1	EIF4G1	IF4G1_HUMAN	4	5	0		0	4	4	0.931357
Nucleolar complex protein 4 homolog	NOC4L	NOC4L_HUMAN	0	6	5		3	5	5	0.929979
Guanine nucleotide-binding protein G(k) subunit alpha	GNAI3	GNAI3_HUMAN	3	3	5		3	9	0	0.929784
Probable ubiquitin carboxyl-terminal hydrolase FAF-X	USP9X	USP9X_HUMAN	16	17	0		10	11	9	0.926886
60S ribosomal protein L29	RPL29	RL29_HUMAN	31	30	28		20	40	32	0.924801
Cystathionine beta-synthase	CBS	CBS_HUMAN	3	10	8		5	7	10	0.924102
General transcription factor 3C polypeptide 1	GTF3C1	TF3C1_HUMAN	19	13	0		8	12	9	0.922063
Nucleolar transcription factor 1	UBTF	UBF1_HUMAN	7	0	2		4	5	0	0.921109
Cytoplasmic dynein 1 heavy chain 1	DYNC1H1	DYHC1_HUMAN	223	237	65		161	188	142	0.91831
Suppressor of SWI4 1 homolog	PPAN	SSF1_HUMAN	4	4	5		8	5	0	0.916319
Probable ATP-dependent RNA helicase DDX31	DDX31	DDX31_HUMAN	4	0	0		0	0	3	0.915942
Nucleolar RNA helicase 2	DDX21	DDX21_HUMAN	68	66	33		54	60	47	0.915435
Prohibitin	PHB	PHB_HUMAN	87	87	55		67	83	74	0.912349
Phosphoacetylglucosamine mutase	PGM3	AGM1_HUMAN	4	7	10		5	10	8	0.910801
Basic leucine zipper and W2 domain-containing protein 2	BZW2	BZW2_HUMAN	4	4	0		0	4	3	0.910033
RNA 3'-terminal phosphate cyclase	RTCA	RTCA_HUMAN	12	10	3		9	8	6	0.90987
ATP-dependent RNA helicase DDX54	DDX54	DDX54_HUMAN	4	5	8		0	11	7	0.909159
Translation initiation factor eIF-2B subunit epsilon	EIF2B5	EI2BE_HUMAN	5	3	3		3	5	3	0.908524
40S ribosomal protein S2	RPS2	RS2_HUMAN	109	114	84		86	133	88	0.908108
60S ribosomal protein L3	RPL3	RL3_HUMAN	106	103	71		99	92	81	0.902896
Emerin	EMD	EMD_HUMAN	26	25	23		23	28	23	0.901212
Kinesin-1 heavy chain	KIF5B	KINH_HUMAN	0	0	4		0	3	3	0.900652
Lamin-B receptor	LBR	LBR_HUMAN	29	37	12		19	31	23	0.900366
Heterogeneous nuclear ribonucleoprotein H	HNRNPH1	HNRH1_HUMAN	65	60	32		52	60	38	0.899599
2-oxoisovalerate dehydrogenase subunit beta, mitochondrial	BCKDHB	ODBB_HUMAN	4	4	4		4	4	4	0.89844
Isocitrate dehydrogenase [NAD] subunit beta, mitochondrial	IDH3B	IDH3B_HUMAN	25	28	22		20	34	21	0.896753
Lysine--tRNA ligase	KARS	SYK_HUMAN	6	7	3		6	5	4	0.896688
U5 small nuclear ribonucleoprotein 200 kDa helicase	SNRNP200	U520_HUMAN	86	75	41		74	69	48	0.895642
26S protease regulatory subunit 10B	PSMC6	PRS10_HUMAN	29	29	20		19	27	29	0.894142
40S ribosomal protein S9	RPS9	RS9_HUMAN	36	5	15		21	14	18	0.89375
Vacuolar protein sorting-associated protein 26A	VPS26A	VP26A_HUMAN	6	7	0		4	5	3	0.893188
Crk-like protein	CRKL	CRKL_HUMAN	4	4	2		4	0	4	0.890794
THO complex subunit 3	THOC3	THOC3_HUMAN	7	5	0		2	5	4	0.887435
Splicing factor U2AF 35 kDa subunit	U2AF1	U2AF1_HUMAN	11	13	7		9	9	11	0.886841
Nuclear pore complex protein Nup205	NUP205	NU205_HUMAN	44	43	26		37	33	36	0.886686
Procollagen-lysine,2-oxoglutarate 5-dioxygenase 1	PLOD1	PLOD1_HUMAN	4	3	0		3	3	0	0.886287
G-protein coupled receptor-associated sorting protein 2	GPRASP2	GASP2_HUMAN	4	0	0		3	0	0	0.885683
DnaJ homolog subfamily A member 2	DNAJA2	DNJA2_HUMAN	5	5	6		4	6	6	0.879105
Protein CMSS1	CMSS1	CMS1_HUMAN	11	12	10		9	12	11	0.878284
Ig kappa chain V-I region Lay		KV113_HUMAN	10	7	9		14	4	7	0.878196
Lamina-associated polypeptide 2, isoform alpha	TMPO	LAP2A_HUMAN	9	12	15		8	16	13	0.877975
Serine/threonine-protein kinase 38-like	STK38L	ST38L_HUMAN	22	22	20		20	27	16	0.877422
Vesicle-fusing ATPase	NSF	NSF_HUMAN	27	28	21		29	21	22	0.876759
Constitutive coactivator of PPAR-gamma-like protein 1	FAM120A	F120A_HUMAN	9	7	7		3	8	11	0.876596
Erlin-2	ERLIN2	ERLN2_HUMAN	47	41	34		34	40	42	0.876532
E3 ubiquitin-protein ligase TRIP12	TRIP12	TRIPC_HUMAN	4	3	3		5	4	0	0.876496
Coatomer subunit gamma-2	COPG2	COPG2_HUMAN	11	14	8		10	11	10	0.875215
Alpha-centractin	ACTR1A	ACTZ_HUMAN	19	17	11		16	16	12	0.874405
Aminoacyl tRNA synthase complex-interacting multifunctional protein 2	AIMP2	AIMP2_HUMAN	10	9	7		6	12	7	0.869949
ATPase WRNIP1	WRNIP1	WRIP1_HUMAN	5	4	6		0	6	8	0.867527
Peroxiredoxin-6	PRDX6	PRDX6_HUMAN	6	5	2		6	5	0	0.866347
Chromodomain-helicase-DNA-binding protein 1-like	CHD1L	CHD1L_HUMAN	6	7	3		5	8	2	0.865946
Nuclear pore complex protein Nup93	NUP93	NUP93_HUMAN	46	46	24		28	43	35	0.861666
Ketosamine-3-kinase	FN3KRP	KT3K_HUMAN	2	2	4		4	0	3	0.861309
GPI transamidase component PIG-S	PIGS	PIGS_HUMAN	0	4	0		3	0	0	0.860102
Dolichyl-diphosphooligosaccharide--protein glycosyltransferase subunit 1	RPN1	RPN1_HUMAN	15	12	8		10	12	10	0.857462
Eukaryotic translation initiation factor 3 subunit A	EIF3A	EIF3A_HUMAN	52	46	23		29	34	44	0.855189
N-acylneuraminate cytidylyltransferase	CMAS	NEUA_HUMAN	3	3	3		4	4	0	0.855128
ATP-dependent 6-phosphofructokinase, platelet type	PFKP	PFKAP_HUMAN	24	22	10		14	21	15	0.850898
DNA topoisomerase 1	TOP1	TOP1_HUMAN	16	15	7		10	14	10	0.850893
Exocyst complex component 4	EXOC4	EXOC4_HUMAN	7	3	3		3	6	3	0.850866
60S ribosomal protein L13a	RPL13A	RL13A_HUMAN	37	8	10		20	9	18	0.850345
Calcium-binding mitochondrial carrier protein Aralar1	SLC25A12	CMC1_HUMAN	3	4	3		4	0	4	0.848734
Acetolactate synthase-like protein	ILVBL	ILVBL_HUMAN	11	17	4		13	11	4	0.847722
Nucleoporin NDC1	NDC1	NDC1_HUMAN	12	13	3		0	11	12	0.845027
Histone H1.2	HIST1H1C	H12_HUMAN	299	318	296		260	292	303	0.844552
GTPase Era, mitochondrial	ERAL1	ERAL1_HUMAN	7	6	3		0	5	8	0.842441
ATP-dependent 6-phosphofructokinase, muscle type	PFKM	PFKAM_HUMAN	17	12	5		10	9	10	0.841611
39S ribosomal protein L11, mitochondrial	MRPL11	RM11_HUMAN	3	0	0		2	0	0	0.84065
Heterogeneous nuclear ribonucleoprotein A1	HNRNPA1	ROA1_HUMAN	64	66	64		54	67	61	0.840159
Ubiquitin-protein ligase E3A	UBE3A	UBE3A_HUMAN	0	3	3		0	3	3	0.838105
60S ribosomal protein L4	RPL4	RL4_HUMAN	187	198	134		145	175	148	0.83267
Heterogeneous nuclear ribonucleoprotein D-like	HNRNPDL	HNRDL_HUMAN	20	17	14		16	16	14	0.830243
NADH dehydrogenase [ubiquinone] 1 alpha subcomplex subunit 10, mitochondrial	NDUFA10	NDUAA_HUMAN	12	12	15		14	7	15	0.829533
Histone H1.5	HIST1H1B	H15_HUMAN	0	4	3		3	4	0	0.828805
Zinc finger CCCH-type antiviral protein 1	ZC3HAV1	ZCCHV_HUMAN	8	6	7		2	6	11	0.827286
Protein RRP5 homolog	PDCD11	RRP5_HUMAN	43	35	17		31	30	21	0.827252
Nucleophosmin	NPM1	NPM_HUMAN	86	65	53		65	58	58	0.826725
Protein polybromo-1	PBRM1	PB1_HUMAN	3	0	4		5	2	0	0.82597
Protein SDA1 homolog	SDAD1	SDA1_HUMAN	10	9	12		9	9	11	0.825816
Ribosomal RNA processing protein 1 homolog B	RRP1B	RRP1B_HUMAN	39	33	17		26	29	22	0.824282
Peroxiredoxin-2	PRDX2	PRDX2_HUMAN	12	0	0		6	4	0	0.822937
Ribosomal protein S6 kinase alpha-3	RPS6KA3	KS6A3_HUMAN	3	3	5		6	4	0	0.82264
Pyruvate dehydrogenase E1 component subunit beta, mitochondrial	PDHB	ODPB_HUMAN	15	12	11		7	18	10	0.822626
SWI/SNF-related matrix-associated actin-dependent regulator of chromatin subfamily A member 5	SMARCA5	SMCA5_HUMAN	16	13	14		14	12	13	0.821564
Adenylate kinase 2, mitochondrial	AK2	KAD2_HUMAN	0	0	2		2	0	0	0.820729
Aladin	AAAS	AAAS_HUMAN	4	6	4		7	5	0	0.819876
Exocyst complex component 8	EXOC8	EXOC8_HUMAN	2	2	0		2	0	0	0.819832
Ornithine aminotransferase, mitochondrial	OAT	OAT_HUMAN	42	44	30		35	38	30	0.819233
Delta-1-pyrroline-5-carboxylate synthase	ALDH18A1	P5CS_HUMAN	54	45	17		31	35	31	0.817458
Hydroxysteroid dehydrogenase-like protein 2	HSDL2	HSDL2_HUMAN	9	14	8		10	13	5	0.815375
Replication factor C subunit 5	RFC5	RFC5_HUMAN	15	16	13		11	18	11	0.814847
Probable tRNA pseudouridine synthase 2	TRUB2	TRUB2_HUMAN	5	4	3		3	0	6	0.814783
Dual specificity mitogen-activated protein kinase kinase 7	MAP2K7	MP2K7_HUMAN	3	3	0		0	4	0	0.814382
Proteasome inhibitor PI31 subunit	PSMF1	PSMF1_HUMAN	3	3	0		0	4	0	0.814382
Oxysterol-binding protein-related protein 8	OSBPL8	OSBL8_HUMAN	3	3	0		0	4	0	0.814382
LINE-1 retrotransposable element ORF1 protein	L1RE1	LORF1_HUMAN	3	3	4		4	0	4	0.813353
Nuclear pore complex protein Nup133	NUP133	NU133_HUMAN	4	5	0		4	3	0	0.813309
L-2-hydroxyglutarate dehydrogenase, mitochondrial	L2HGDH	L2HDH_HUMAN	5	4	3		0	0	8	0.812984
DNA replication licensing factor MCM5	MCM5	MCM5_HUMAN	41	40	19		30	30	25	0.812278
Transcription elongation factor, mitochondrial	TEFM	TEFM_HUMAN	0	0	4		3	0	2	0.810776
Guanine nucleotide-binding protein-like 3-like protein	GNL3L	GNL3L_HUMAN	6	0	0		0	2	3	0.806323
Translational activator GCN1	GCN1L1	GCN1L_HUMAN	130	111	31		84	77	60	0.806209
28S ribosomal protein S5, mitochondrial	MRPS5	RT05_HUMAN	14	13	13		10	14	12	0.805959
Nucleolar complex protein 2 homolog	NOC2L	NOC2L_HUMAN	21	23	16		14	17	21	0.805916
COUP transcription factor 2	NR2F2	COT2_HUMAN	2	5	3		2	4	3	0.804144
Cleavage and polyadenylation specificity factor subunit 5	NUDT21	CPSF5_HUMAN	6	4	0		3	0	4	0.803888
V-type proton ATPase subunit d 1	ATP6V0D1	VA0D1_HUMAN	4	3	5		4	3	4	0.802909
Spindlin-1	SPIN1	SPIN1_HUMAN	20	28	23		15	27	22	0.802444
28S ribosomal protein S22, mitochondrial	MRPS22	RT22_HUMAN	18	17	15		10	22	13	0.80203
Transcription activator BRG1	SMARCA4	SMCA4_HUMAN	25	16	13		20	14	12	0.80088
Heterogeneous nuclear ribonucleoproteins A2/B1	HNRNPA2B1	ROA2_HUMAN	107	115	103		96	98	94	0.80063
Serum albumin	ALB	ALBU_HUMAN	118	119	86		94	105	82	0.799562
39S ribosomal protein L38, mitochondrial	MRPL38	RM38_HUMAN	5	4	5		4	0	7	0.799056
X-ray repair cross-complementing protein 5	XRCC5	XRCC5_HUMAN	41	30	27		21	27	36	0.79767
Condensin-2 complex subunit D3	NCAPD3	CNDD3_HUMAN	4	3	4		0	4	5	0.796602
Condensin complex subunit 3	NCAPG	CND3_HUMAN	5	4	4		5	6	0	0.796531
von Willebrand factor A domain-containing protein 8	VWA8	VWA8_HUMAN	3	2	0		0	3	0	0.795746
Trifunctional enzyme subunit beta, mitochondrial	HADHB	ECHB_HUMAN	24	25	19		16	22	21	0.795362
Rac GTPase-activating protein 1	RACGAP1	RGAP1_HUMAN	5	6	7		0	10	6	0.793276
DnaJ homolog subfamily C member 13	DNAJC13	DJC13_HUMAN	22	15	7		17	18	2	0.792455
Sideroflexin-2	SFXN2	SFXN2_HUMAN	18	15	4		7	15	8	0.790386
60S ribosomal protein L9	RPL9	RL9_HUMAN	36	5	7		21	4	12	0.788615
Scaffold attachment factor B1	SAFB	SAFB1_HUMAN	3	3	3		0	3	4	0.788167
Probable cytosolic iron-sulfur protein assembly protein CIAO1	CIAO1	CIAO1_HUMAN	6	5	6		2	6	7	0.785473
E3 ubiquitin-protein ligase MYCBP2	MYCBP2	MYCB2_HUMAN	4	3	0		4	0	0	0.785171
Acylglycerol kinase, mitochondrial	AGK	AGK_HUMAN	4	3	0		4	0	0	0.785171
Acyl-coenzyme A thioesterase 9, mitochondrial	ACOT9	ACOT9_HUMAN	6	6	7		4	7	6	0.783986
Thyroid adenoma-associated protein	THADA	THADA_HUMAN	3	0	0		0	2	0	0.781992
Cleavage and polyadenylation specificity factor subunit 4	CPSF4	CPSF4_HUMAN	3	4	0		4	0	0	0.78092
Centromere protein V	CENPV	CENPV_HUMAN	23	21	12		12	22	13	0.780164
Ribosomal RNA processing protein 1 homolog A	RRP1	RRP1_HUMAN	5	8	6		6	3	7	0.779581
DNA-dependent protein kinase catalytic subunit	PRKDC	PRKDC_HUMAN	526	471	227		317	371	307	0.777597
Eukaryotic translation initiation factor 3 subunit B	EIF3B	EIF3B_HUMAN	29	33	11		20	20	18	0.774357
Heterogeneous nuclear ribonucleoprotein A0	HNRNPA0	ROA0_HUMAN	23	20	15		15	21	13	0.77308
Probable tRNA N6-adenosine threonylcarbamoyltransferase	OSGEP	OSGEP_HUMAN	9	8	5		6	6	6	0.772403
DNA topoisomerase 2-beta	TOP2B	TOP2B_HUMAN	19	16	9		13	14	9	0.771682
T-complex protein 1 subunit eta	CCT7	TCPH_HUMAN	5	5	6		7	4	3	0.771572
Proliferating cell nuclear antigen	PCNA	PCNA_HUMAN	43	41	29		28	40	27	0.771127
28S ribosomal protein S27, mitochondrial	MRPS27	RT27_HUMAN	15	12	11		11	11	10	0.770905
Ribosomal L1 domain-containing protein 1	RSL1D1	RL1D1_HUMAN	26	24	14		20	22	11	0.770666
U4/U6 small nuclear ribonucleoprotein Prp4	PRPF4	PRP4_HUMAN	0	3	3		0	5	0	0.768272
Nucleolar pre-ribosomal-associated protein 1	URB1	NPA1P_HUMAN	5	4	0		3	0	3	0.768047
60S acidic ribosomal protein P0	RPLP0	RLA0_HUMAN	54	56	27		32	56	25	0.766927
Cell growth-regulating nucleolar protein	LYAR	LYAR_HUMAN	14	15	9		11	16	5	0.764954
Tubulin gamma-1 chain	TUBG1	TBG1_HUMAN	22	19	8		12	16	11	0.764772
Zinc finger RNA-binding protein	ZFR	ZFR_HUMAN	0	0	2		0	2	0	0.763461
Interleukin enhancer-binding factor 2	ILF2	ILF2_HUMAN	44	31	11		22	27	18	0.763214
60S ribosomal protein L17	RPL17	RL17_HUMAN	34	6	9		22	8	8	0.762543
E3 ubiquitin-protein ligase UBR4	UBR4	UBR4_HUMAN	7	8	4		4	4	7	0.762018
Putative methyltransferase C9orf114	C9orf114	CI114_HUMAN	0	3	0		0	2	0	0.761556
Eukaryotic translation initiation factor 3 subunit I	EIF3I	EIF3I_HUMAN	29	41	38		31	34	28	0.761074
H/ACA ribonucleoprotein complex subunit 4	DKC1	DKC1_HUMAN	5	10	12		4	9	11	0.75934
Prohibitin-2	PHB2	PHB2_HUMAN	128	125	84		78	113	86	0.758854
Putative mitochondrial import inner membrane translocase subunit Tim23B	TIMM23B	TI23B_HUMAN	5	0	0		3	0	0	0.757806
39S ribosomal protein L39, mitochondrial	MRPL39	RM39_HUMAN	11	11	5		5	12	5	0.757191
AP-3 complex subunit mu-1	AP3M1	AP3M1_HUMAN	5	6	0		4	4	0	0.756108
ATP-binding cassette sub-family F member 2	ABCF2	ABCF2_HUMAN	30	23	22		21	27	15	0.755917
39S ribosomal protein L44, mitochondrial	MRPL44	RM44_HUMAN	11	10	3		4	11	4	0.75393
ELAV-like protein 2	ELAVL2	ELAV2_HUMAN	5	6	3		4	3	4	0.751915
Heterogeneous nuclear ribonucleoprotein L	HNRNPL	HNRPL_HUMAN	20	40	31		23	28	26	0.751821
26S proteasome non-ATPase regulatory subunit 14	PSMD14	PSDE_HUMAN	6	6	7		4	5	7	0.751256
Elongation factor 1-gamma	EEF1G	EF1G_HUMAN	22	27	16		15	23	15	0.748832
Pantothenate kinase 4	PANK4	PANK4_HUMAN	0	2	3		0	4	0	0.747457
DnaJ homolog subfamily A member 3, mitochondrial	DNAJA3	DNJA3_HUMAN	25	28	9		11	22	15	0.745239
Probable ATP-dependent RNA helicase DHX40	DHX40	DHX40_HUMAN	4	2	0		3	0	0	0.744363
60S ribosomal protein L6	RPL6	RL6_HUMAN	98	92	86		73	87	68	0.743486
ATP-dependent 6-phosphofructokinase, liver type	PFKL	PFKAL_HUMAN	46	35	12		23	25	22	0.742933
Required for meiotic nuclear division protein 1 homolog	RMND1	RMND1_HUMAN	5	6	0		0	6	2	0.742253
Mitochondrial thiamine pyrophosphate carrier	SLC25A19	TPC_HUMAN	3	11	3		5	8	0	0.741227
Sphingomyelin phosphodiesterase 4	SMPD4	NSMA3_HUMAN	8	6	10		7	4	9	0.740412
Brefeldin A-inhibited guanine nucleotide-exchange protein 2	ARFGEF2	BIG2_HUMAN	6	0	2		5	0	0	0.74025
Carbonyl reductase [NADPH] 1	CBR1	CBR1_HUMAN	18	21	14		9	25	10	0.7402
N-alpha-acetyltransferase 25, NatB auxiliary subunit	NAA25	NAA25_HUMAN	2	0	0		0	0	0	0.735878
General transcription factor 3C polypeptide 4	GTF3C4	TF3C4_HUMAN	2	0	0		0	0	0	0.735878
Tyrosine-protein kinase JAK1	JAK1	JAK1_HUMAN	2	0	0		0	0	0	0.735878
Dual specificity mitogen-activated protein kinase kinase 4	MAP2K4	MP2K4_HUMAN	2	0	0		0	0	0	0.735878
Protein YIPF5	YIPF5	YIPF5_HUMAN	2	0	0		0	0	0	0.735878
Pericentriolar material 1 protein	PCM1	PCM1_HUMAN	2	0	0		0	0	0	0.735878
Conserved oligomeric Golgi complex subunit 5	COG5	COG5_HUMAN	2	0	0		0	0	0	0.735878
28S ribosomal protein S25, mitochondrial	MRPS25	RT25_HUMAN	2	0	0		0	0	0	0.735878
Methyl-CpG-binding domain protein 3	MBD3	MBD3_HUMAN	2	0	0		0	0	0	0.735878
Cleavage and polyadenylation specificity factor subunit 7	CPSF7	CPSF7_HUMAN	2	0	0		0	0	0	0.735878
TGF-beta-activated kinase 1 and MAP3K7-binding protein 3	TAB3	TAB3_HUMAN	2	0	0		0	0	0	0.735878
Serine/arginine-rich splicing factor 4	SRSF4	SRSF4_HUMAN	2	0	0		0	0	0	0.735878
Exosome complex component CSL4	EXOSC1	EXOS1_HUMAN	2	0	0		0	0	0	0.735878
39S ribosomal protein L48, mitochondrial	MRPL48	RM48_HUMAN	2	0	0		0	0	0	0.735878
Serine/threonine-protein phosphatase 6 catalytic subunit	PPP6C	PPP6_HUMAN	7	9	4		0	9	6	0.734861
Heterogeneous nuclear ribonucleoprotein U	HNRNPU	HNRPU_HUMAN	177	178	87		111	118	111	0.734421
Glutamine--fructose-6-phosphate aminotransferase [isomerizing] 1	GFPT1	GFPT1_HUMAN	7	7	7		5	5	7	0.734286
KH domain-containing, RNA-binding, signal transduction-associated protein 1	KHDRBS1	KHDR1_HUMAN	6	6	5		4	0	8	0.734246
ATP-dependent RNA helicase DDX3X	DDX3X	DDX3X_HUMAN	58	55	49		45	46	40	0.734049
Transcriptional activator protein Pur-alpha	PURA	PURA_HUMAN	11	9	13		8	6	13	0.732981
Erlin-1	ERLIN1	ERLN1_HUMAN	18	15	8		6	10	15	0.732236
GPI-anchor transamidase	PIGK	GPI8_HUMAN	5	6	5		0	5	7	0.731733
Signal transducer and activator of transcription 1-alpha/beta	STAT1	STAT1_HUMAN	6	4	0		3	4	0	0.730543
Splicing factor 3B subunit 3	SF3B3	SF3B3_HUMAN	59	58	21		37	39	28	0.73022
Cell division cycle 5-like protein	CDC5L	CDC5L_HUMAN	4	3	5		0	3	6	0.727064
Signal recognition particle subunit SRP72	SRP72	SRP72_HUMAN	5	0	5		5	0	3	0.726821
HEAT repeat-containing protein 1	HEATR1	HEAT1_HUMAN	8	13	6		7	8	6	0.726141
RNA 3'-terminal phosphate cyclase-like protein	RCL1	RCL1_HUMAN	7	6	7		6	4	6	0.723693
Guanine nucleotide-binding protein subunit alpha-11	GNA11	GNA11_HUMAN	2	0	3		2	0	2	0.721325
Serine/threonine-protein phosphatase 2A 56 kDa regulatory subunit delta isoform	PPP2R5D	2A5D_HUMAN	0	2	0		0	0	0	0.719723
Uncharacterized protein C17orf85	C17orf85	CQ085_HUMAN	0	2	0		0	0	0	0.719723
Serine/threonine-protein kinase 4	STK4	STK4_HUMAN	0	2	0		0	0	0	0.719723
Arf-GAP with coiled-coil, ANK repeat and PH domain-containing protein 2	ACAP2	ACAP2_HUMAN	0	2	0		0	0	0	0.719723
Exosome complex component RRP41	EXOSC4	EXOS4_HUMAN	0	2	0		0	0	0	0.719723
3-keto-steroid reductase	HSD17B7	DHB7_HUMAN	0	2	0		0	0	0	0.719723
DNA-binding protein SATB2	SATB2	SATB2_HUMAN	0	2	0		0	0	0	0.719723
Vacuolar protein sorting-associated protein 51 homolog	VPS51	VPS51_HUMAN	2	3	4		3	4	0	0.715636
Myosin-9	MYH9	MYH9_HUMAN	25	7	6		13	15	0	0.715343
Long-chain fatty acid transport protein 4	SLC27A4	S27A4_HUMAN	4	3	0		0	4	0	0.713782
Deoxyribose-phosphate aldolase	DERA	DEOC_HUMAN	10	8	0		2	11	0	0.712974
Aldehyde dehydrogenase family 16 member A1	ALDH16A1	A16A1_HUMAN	9	10	7		5	7	8	0.712048
CCR4-NOT transcription complex subunit 1	CNOT1	CNOT1_HUMAN	8	8	4		7	5	3	0.71131
Ribosome biogenesis protein BMS1 homolog	BMS1	BMS1_HUMAN	7	3	5		4	5	3	0.710894
Plasminogen activator inhibitor 1 RNA-binding protein	SERBP1	PAIRB_HUMAN	5	6	6		6	0	6	0.70852
ELAV-like protein 1	ELAVL1	ELAV1_HUMAN	43	47	34		31	37	28	0.707422
T-complex protein 1 subunit epsilon	CCT5	TCPE_HUMAN	26	37	35		26	33	20	0.703904
ATP-dependent RNA helicase DDX18	DDX18	DDX18_HUMAN	17	18	12		14	14	8	0.703094
Mitochondrial Rho GTPase 2	RHOT2	MIRO2_HUMAN	8	6	3		5	2	5	0.702084
THO complex subunit 2	THOC2	THOC2_HUMAN	17	12	9		9	8	11	0.700352
Chromatin target of PRMT1 protein	CHTOP	CHTOP_HUMAN	21	26	32		8	28	28	0.698655
Isocitrate dehydrogenase [NAD] subunit gamma, mitochondrial	IDH3G	IDH3G_HUMAN	7	5	6		5	5	4	0.696135
Heterogeneous nuclear ribonucleoprotein R	HNRNPR	HNRPR_HUMAN	60	64	43		44	41	40	0.695787
Serine/threonine-protein phosphatase PP1-alpha catalytic subunit	PPP1CA	PP1A_HUMAN	5	3	3		4	0	3	0.694293
Cytoplasmic dynein 1 light intermediate chain 1	DYNC1LI1	DC1L1_HUMAN	5	10	6		4	6	6	0.694052
Uncharacterized protein C3orf17	C3orf17	CC017_HUMAN	0	3	3		2	3	0	0.69145
2-amino-3-ketobutyrate coenzyme A ligase, mitochondrial	GCAT	KBL_HUMAN	13	11	0		8	8	0	0.688763
DNA topoisomerase 2-alpha	TOP2A	TOP2A_HUMAN	38	27	16		7	13	36	0.683456
Monofunctional C1-tetrahydrofolate synthase, mitochondrial	MTHFD1L	C1TM_HUMAN	26	22	4		14	17	5	0.683106
Centromere/kinetochore protein zw10 homolog	ZW10	ZW10_HUMAN	14	8	7		7	7	7	0.681221
Ras GTPase-activating-like protein IQGAP1	IQGAP1	IQGA1_HUMAN	15	18	8		11	9	9	0.677645
Dimethyladenosine transferase 2, mitochondrial	TFB2M	TFB2M_HUMAN	6	4	7		5	3	5	0.676146
Cytochrome b-c1 complex subunit 2, mitochondrial	UQCRC2	QCR2_HUMAN	42	45	22		23	33	22	0.672626
Methyltransferase-like protein 17, mitochondrial	METTL17	MET17_HUMAN	4	3	0		0	0	3	0.670511
Probable ATP-dependent RNA helicase DDX41	DDX41	DDX41_HUMAN	3	0	3		0	4	0	0.668591
La-related protein 1	LARP1	LARP1_HUMAN	21	11	17		10	10	16	0.667482
Annexin A6	ANXA6	ANXA6_HUMAN	3	4	0		0	0	3	0.666881
Eukaryotic initiation factor 4A-III	EIF4A3	IF4A3_HUMAN	10	12	8		5	10	7	0.666694
Isocitrate dehydrogenase [NADP], mitochondrial	IDH2	IDHP_HUMAN	25	29	19		18	16	18	0.663674
THUMP domain-containing protein 3	THUMPD3	THUM3_HUMAN	0	5	5		4	4	0	0.661212
Methylosome subunit pICln	CLNS1A	ICLN_HUMAN	26	26	14		10	25	12	0.655599
Protein pelota homolog	PELO	PELO_HUMAN	8	12	16		5	13	10	0.653617
Glioma tumor suppressor candidate region gene 2 protein	GLTSCR2	GSCR2_HUMAN	3	2	3		4	0	0	0.650745
Mitotic checkpoint protein BUB3	BUB3	BUB3_HUMAN	4	0	0		0	2	0	0.650034
26S proteasome non-ATPase regulatory subunit 2	PSMD2	PSMD2_HUMAN	35	36	22		19	20	25	0.649998
26S protease regulatory subunit 8	PSMC5	PRS8_HUMAN	40	40	28		23	28	24	0.641383
Heterogeneous nuclear ribonucleoproteins C1/C2	HNRNPC	HNRPC_HUMAN	72	62	32		29	52	32	0.640516
Pyruvate dehydrogenase E1 component subunit alpha, somatic form, mitochondrial	PDHA1	ODPA_HUMAN	18	16	10		8	6	15	0.639083
Protein LSM14 homolog A	LSM14A	LS14A_HUMAN	0	4	6		4	4	0	0.637692
Methylosome protein 50	WDR77	MEP50_HUMAN	131	137	86		81	85	76	0.637665
Nicalin	NCLN	NCLN_HUMAN	5	7	3		4	3	3	0.636989
RNA pseudouridylate synthase domain-containing protein 3	RPUSD3	RUSD3_HUMAN	11	12	8		6	6	9	0.63679
Serine/arginine-rich splicing factor 2	SRSF2	SRSF2_HUMAN	11	9	8		7	5	7	0.630841
Elongation factor Tu, mitochondrial	TUFM	EFTU_HUMAN	110	116	103		68	83	78	0.628665
Poly(U)-binding-splicing factor PUF60	PUF60	PUF60_HUMAN	8	16	11		7	12	6	0.628551
39S ribosomal protein L3, mitochondrial	MRPL3	RM03_HUMAN	5	5	4		2	6	2	0.627471
Protein arginine N-methyltransferase 5	PRMT5	ANM5_HUMAN	323	336	128		183	196	133	0.625881
Gem-associated protein 2	GEMIN2	GEMI2_HUMAN	3	3	2		0	4	0	0.624554
Dedicator of cytokinesis protein 11	DOCK11	DOC11_HUMAN	3	0	4		4	0	0	0.623018
Sec1 family domain-containing protein 1	SCFD1	SCFD1_HUMAN	3	6	0		4	0	0	0.62148
rRNA methyltransferase 3, mitochondrial	RNMTL1	MRM3_HUMAN	18	24	23		15	19	12	0.619743
Transmembrane protein 33	TMEM33	TMM33_HUMAN	10	0	0		0	3	3	0.616633
Serine/threonine-protein kinase MRCK alpha	CDC42BPA	MRCKA_HUMAN	7	4	0		5	0	0	0.614834
Very-long-chain (3R)-3-hydroxyacyl-CoA dehydratase 3	HACD3	HACD3_HUMAN	25	26	6		14	12	9	0.610807
Rabankyrin-5	ANKFY1	ANFY1_HUMAN	5	4	0		0	3	2	0.610174
Heterogeneous nuclear ribonucleoprotein A/B	HNRNPAB	ROAA_HUMAN	21	22	17		11	15	14	0.609631
Proteasomal ubiquitin receptor ADRM1	ADRM1	ADRM1_HUMAN	4	10	8		6	4	5	0.606774
Mitochondrial import receptor subunit TOM40 homolog	TOMM40	TOM40_HUMAN	14	8	0		0	10	3	0.604544
Probable 28S rRNA (cytosine(4447)-C(5))-methyltransferase	NOP2	NOP2_HUMAN	9	17	16		11	10	8	0.602475
Cysteine desulfurase, mitochondrial	NFS1	NFS1_HUMAN	5	6	2		2	3	3	0.598306
DnaJ homolog subfamily C member 9	DNAJC9	DNJC9_HUMAN	4	3	0		0	3	0	0.594818
5'-AMP-activated protein kinase catalytic subunit alpha-1	PRKAA1	AAPK1_HUMAN	0	4	3		0	4	0	0.588495
Neurofibromin	NF1	NF1_HUMAN	3	0	0		0	0	0	0.586494
Nischarin	NISCH	NISCH_HUMAN	3	0	0		0	0	0	0.586494
Alpha-aminoadipic semialdehyde synthase, mitochondrial	AASS	AASS_HUMAN	3	0	0		0	0	0	0.586494
Cullin-1	CUL1	CUL1_HUMAN	3	0	0		0	0	0	0.586494
TraB domain-containing protein	TRABD	TRABD_HUMAN	3	0	0		0	0	0	0.586494
HAUS augmin-like complex subunit 5	HAUS5	HAUS5_HUMAN	3	0	0		0	0	0	0.586494
Cell division cycle and apoptosis regulator protein 1	CCAR1	CCAR1_HUMAN	3	0	0		0	0	0	0.586494
26S proteasome non-ATPase regulatory subunit 7	PSMD7	PSMD7_HUMAN	3	0	0		0	0	0	0.586494
40S ribosomal protein S30	FAU	RS30_HUMAN	3	0	0		0	0	0	0.586494
Lysozyme C	LYZ	LYSC_HUMAN	3	0	0		0	0	0	0.586494
Cullin-4B	CUL4B	CUL4B_HUMAN	3	0	0		0	0	0	0.586494
Ran-binding protein 9	RANBP9	RANB9_HUMAN	3	0	0		0	0	0	0.586494
RAD50-interacting protein 1	RINT1	RINT1_HUMAN	3	0	0		0	0	0	0.586494
Ribosome biogenesis regulatory protein homolog	RRS1	RRS1_HUMAN	3	0	0		0	0	0	0.586494
Serine/threonine-protein kinase TBK1	TBK1	TBK1_HUMAN	3	0	0		0	0	0	0.586494
Derlin-1	DERL1	DERL1_HUMAN	3	0	0		0	0	0	0.586494
Succinate dehydrogenase [ubiquinone] flavoprotein subunit, mitochondrial	SDHA	SDHA_HUMAN	3	0	0		0	0	0	0.586494
Succinyl-CoA ligase [ADP-forming] subunit beta, mitochondrial	SUCLA2	SUCB1_HUMAN	36	30	37		20	24	24	0.586066
Probable ATP-dependent RNA helicase DDX17	DDX17	DDX17_HUMAN	43	35	22		17	23	22	0.585451
Guanine nucleotide-binding protein G(I)/G(S)/G(T) subunit beta-1	GNB1	GBB1_HUMAN	5	7	4		4	3	3	0.583421
Tuftelin-interacting protein 11	TFIP11	TFP11_HUMAN	0	0	3		0	2	0	0.58318
RNA-binding protein 25	RBM25	RBM25_HUMAN	0	0	3		0	2	0	0.58318
rRNA 2'-O-methyltransferase fibrillarin	FBL	FBRL_HUMAN	40	35	36		21	28	23	0.580812
H/ACA ribonucleoprotein complex subunit 1	GAR1	GAR1_HUMAN	10	5	0		5	3	0	0.580209
Heterochromatin protein 1-binding protein 3	HP1BP3	HP1B3_HUMAN	29	22	21		13	19	14	0.578785
DNA-directed RNA polymerase II subunit RPB1	POLR2A	RPB1_HUMAN	5	3	0		3	0	0	0.577074
Nuclear pore complex protein Nup88	NUP88	NUP88_HUMAN	4	4	4		0	4	3	0.576956
Mannose-1-phosphate guanyltransferase alpha	GMPPA	GMPPA_HUMAN	6	4	6		0	0	8	0.576627
Acetyl-CoA acetyltransferase, mitochondrial	ACAT1	THIL_HUMAN	6	4	9		0	5	7	0.576074
Heterogeneous nuclear ribonucleoprotein K	HNRNPK	HNRPK_HUMAN	25	46	32		21	25	20	0.574911
Propionyl-CoA carboxylase alpha chain, mitochondrial	PCCA	PCCA_HUMAN	0	0	2		0	0	0	0.572595
tRNA (adenine(58)-N(1))-methyltransferase non-catalytic subunit TRM6	TRMT6	TRM6_HUMAN	0	0	2		0	0	0	0.572595
Acyl-coenzyme A thioesterase 8	ACOT8	ACOT8_HUMAN	6	3	0		0	4	0	0.572372
Serine/threonine-protein kinase SMG1	SMG1	SMG1_HUMAN	2	2	0		0	0	0	0.57197
Mitochondrial import inner membrane translocase subunit TIM44	TIMM44	TIM44_HUMAN	2	2	0		0	0	0	0.57197
WD repeat-containing protein 5	WDR5	WDR5_HUMAN	7	8	7		5	5	4	0.571806
NADPH:adrenodoxin oxidoreductase, mitochondrial	FDXR	ADRO_HUMAN	0	3	0		0	0	0	0.571167
Protein PRRC2C	PRRC2C	PRC2C_HUMAN	0	3	0		0	0	0	0.571167
TRMT1-like protein	TRMT1L	TRM1L_HUMAN	0	3	0		0	0	0	0.571167
Gamma-tubulin complex component 3	TUBGCP3	GCP3_HUMAN	0	3	0		0	0	0	0.571167
Tryptophan--tRNA ligase, cytoplasmic	WARS	SYWC_HUMAN	0	3	0		0	0	0	0.571167
RUS1 family protein C16orf58	C16orf58	RUS1_HUMAN	0	3	0		0	0	0	0.571167
S-adenosylmethionine synthase isoform type-2	MAT2A	METK2_HUMAN	20	12	6		7	8	7	0.564081
60S ribosomal protein L21	RPL21	RL21_HUMAN	30	4	8		12	5	7	0.563212
Interleukin enhancer-binding factor 3	ILF3	ILF3_HUMAN	60	59	45		25	30	44	0.562801
60S ribosomal protein L18a	RPL18A	RL18A_HUMAN	58	3	13		23	10	9	0.56024
39S ribosomal protein L37, mitochondrial	MRPL37	RM37_HUMAN	8	10	4		3	6	4	0.557944
Striatin-interacting protein 1	STRIP1	STRP1_HUMAN	3	0	3		0	3	0	0.557159
Succinyl-CoA ligase [GDP-forming] subunit beta, mitochondrial	SUCLG2	SUCB2_HUMAN	28	20	19		8	18	15	0.556619
ATP synthase subunit O, mitochondrial	ATP5O	ATPO_HUMAN	19	3	10		10	3	6	0.555738
Putative ATP-dependent RNA helicase DHX57	DHX57	DHX57_HUMAN	0	2	3		0	0	2	0.551147
Pre-mRNA 3'-end-processing factor FIP1	FIP1L1	FIP1_HUMAN	5	3	2		0	3	2	0.549845
Proteasomal ATPase-associated factor 1	PAAF1	PAAF1_HUMAN	5	3	5		0	2	5	0.547705
Unconventional myosin-Va	MYO5A	MYO5A_HUMAN	11	7	4		6	6	0	0.545323
RNA-binding protein Raly	RALY	RALY_HUMAN	17	11	15		9	8	9	0.543114
Protein KRI1 homolog	KRI1	KRI1_HUMAN	3	3	0		0	2	0	0.542921
28S ribosomal protein S23, mitochondrial	MRPS23	RT23_HUMAN	12	0	0		5	0	0	0.535948
Medium-chain specific acyl-CoA dehydrogenase, mitochondrial	ACADM	ACADM_HUMAN	7	8	6		3	3	6	0.534793
Signal transducer and activator of transcription 3	STAT3	STAT3_HUMAN	12	5	3		3	5	3	0.531497
RRP15-like protein	RRP15	RRP15_HUMAN	6	5	5		0	0	7	0.530888
pre-rRNA processing protein FTSJ3	FTSJ3	SPB1_HUMAN	0	0	11		3	0	5	0.530401
26S proteasome non-ATPase regulatory subunit 1	PSMD1	PSMD1_HUMAN	10	7	4		6	5	0	0.527584
Pyridoxal-dependent decarboxylase domain-containing protein 1	PDXDC1	PDXD1_HUMAN	4	4	0		0	3	0	0.526867
AFG3-like protein 2	AFG3L2	AFG32_HUMAN	8	6	3		4	2	3	0.520383
Calcium-binding mitochondrial carrier protein SCaMC-1	SLC25A24	SCMC1_HUMAN	53	45	42		24	23	32	0.520161
Acetyl-CoA carboxylase 1	ACACA	ACACA_HUMAN	9	6	0		5	2	0	0.519287
Cytoplasmic FMR1-interacting protein 2	CYFIP2	CYFP2_HUMAN	6	4	6		5	0	3	0.51203
NADH dehydrogenase [ubiquinone] iron-sulfur protein 2, mitochondrial	NDUFS2	NDUS2_HUMAN	8	9	10		6	7	3	0.511851
DnaJ homolog subfamily C member 10	DNAJC10	DJC10_HUMAN	46	38	28		19	26	17	0.509675
Phosphoglycolate phosphatase	PGP	PGP_HUMAN	8	4	2		0	6	0	0.503687
Pre-mRNA-processing-splicing factor 8	PRPF8	PRP8_HUMAN	79	53	25		28	35	19	0.501328
Putative oxidoreductase GLYR1	GLYR1	GLYR1_HUMAN	13	25	16		10	12	8	0.499077
[3-methyl-2-oxobutanoate dehydrogenase [lipoamide]] kinase, mitochondrial	BCKDK	BCKD_HUMAN	10	9	6		3	4	6	0.493072
Mitochondrial-processing peptidase subunit beta	PMPCB	MPPB_HUMAN	3	0	3		0	0	2	0.492995
2',3'-cyclic-nucleotide 3'-phosphodiesterase	CNP	CN37_HUMAN	13	13	12		5	4	11	0.490832
Pre-mRNA-splicing factor ATP-dependent RNA helicase DHX15	DHX15	DHX15_HUMAN	33	29	18		11	18	13	0.489219
Spermatid perinuclear RNA-binding protein	STRBP	STRBP_HUMAN	4	0	0		0	0	0	0.487526
UDP-N-acetylglucosamine--peptide N-acetylglucosaminyltransferase 110 kDa subunit	OGT	OGT1_HUMAN	4	0	0		0	0	0	0.487526
Transmembrane protein 126A	TMEM126A	T126A_HUMAN	4	0	0		0	0	0	0.487526
Dedicator of cytokinesis protein 7	DOCK7	DOCK7_HUMAN	4	0	0		0	0	0	0.487526
Methylcytosine dioxygenase TET2	TET2	TET2_HUMAN	4	0	0		0	0	0	0.487526
Mitochondrial Rho GTPase 1	RHOT1	MIRO1_HUMAN	4	0	0		0	0	0	0.487526
RNA-binding protein 5	RBM5	RBM5_HUMAN	4	0	0		0	0	0	0.487526
Hydroxyacyl-coenzyme A dehydrogenase, mitochondrial	HADH	HCDH_HUMAN	3	4	3		0	4	0	0.487383
Transformation/transcription domain-associated protein	TRRAP	TRRAP_HUMAN	12	13	0		0	5	6	0.481686
Cytochrome b-c1 complex subunit 1, mitochondrial	UQCRC1	QCR1_HUMAN	5	7	3		3	4	0	0.479034
Activating signal cointegrator 1 complex subunit 3	ASCC3	ASCC3_HUMAN	11	15	0		0	3	8	0.4775
Protein Njmu-R1	C17orf75	NJMU_HUMAN	3	2	0		0	0	0	0.477448
Cleavage and polyadenylation specificity factor subunit 2	CPSF2	CPSF2_HUMAN	3	2	0		0	0	0	0.477448
Syntaxin-binding protein 2	STXBP2	STXB2_HUMAN	2	3	0		0	0	0	0.473996
Serine/threonine-protein kinase ATR	ATR	ATR_HUMAN	0	4	0		0	0	0	0.473444
Manganese-transporting ATPase 13A1	ATP13A1	AT131_HUMAN	7	3	0		3	0	0	0.473052
Ubiquitin carboxyl-terminal hydrolase 24	USP24	UBP24_HUMAN	6	2	0		0	0	2	0.47073
Polyadenylate-binding protein 1	PABPC1	PABP1_HUMAN	166	172	120		70	80	80	0.465417
Serine/arginine-rich splicing factor 5	SRSF5	SRSF5_HUMAN	22	13	13		5	10	9	0.459687
DNA-directed RNA polymerase I subunit RPA34	CD3EAP	RPA34_HUMAN	6	7	6		5	4	0	0.45673
U4/U6 small nuclear ribonucleoprotein Prp31	PRPF31	PRP31_HUMAN	73	83	77		32	51	37	0.456623
Actin-related protein 2	ACTR2	ARP2_HUMAN	6	5	9		5	5	0	0.448002
Serine/arginine-rich splicing factor 1	SRSF1	SRSF1_HUMAN	49	52	44		7	44	23	0.447726
Casein kinase II subunit alpha'	CSNK2A2	CSK22_HUMAN	4	4	5		0	4	2	0.447555
40S ribosomal protein S5	RPS5	RS5_HUMAN	17	0	7		5	4	3	0.446361
Phosphatidylinositol 4-phosphate 5-kinase type-1 gamma	PIP5K1C	PI51C_HUMAN	14	18	13		0	9	12	0.445406
Cytoskeleton-associated protein 5	CKAP5	CKAP5_HUMAN	9	10	7		6	6	0	0.440934
Vacuolar protein sorting-associated protein 52 homolog	VPS52	VPS52_HUMAN	0	3	3		0	2	0	0.439013
Arginase-1	ARG1	ARGI1_HUMAN	0	0	3		0	0	0	0.437385
Crooked neck-like protein 1	CRNKL1	CRNL1_HUMAN	0	0	3		0	0	0	0.437385
Beta-adrenergic receptor kinase 1	ADRBK1	ARBK1_HUMAN	0	0	3		0	0	0	0.437385
Fatty acyl-CoA reductase 1	FAR1	FACR1_HUMAN	0	0	3		0	0	0	0.437385
Protein EFR3 homolog A	EFR3A	EFR3A_HUMAN	0	0	3		0	0	0	0.437385
CLIP-associating protein 2	CLASP2	CLAP2_HUMAN	0	0	3		0	0	0	0.437385
Kelch-like ECH-associated protein 1	KEAP1	KEAP1_HUMAN	0	0	3		0	0	0	0.437385
Chromobox protein homolog 8	CBX8	CBX8_HUMAN	0	0	3		0	0	0	0.437385
Ribosome-binding protein 1	RRBP1	RRBP1_HUMAN	5	6	0		3	0	0	0.42925
Serine/threonine-protein kinase RIO1	RIOK1	RIOK1_HUMAN	155	161	120		58	80	66	0.427853
Serine/threonine-protein kinase MARK2	MARK2	MARK2_HUMAN	0	0	6		0	3	0	0.426698
Adenosylhomocysteinase	AHCY	SAHH_HUMAN	4	0	5		0	0	3	0.425322
FAST kinase domain-containing protein 2	FASTKD2	FAKD2_HUMAN	0	5	6		0	0	4	0.424347
Heterogeneous nuclear ribonucleoprotein U-like protein 2	HNRNPUL2	HNRL2_HUMAN	5	0	0		0	0	0	0.417136
60S ribosomal protein L34	RPL34	RL34_HUMAN	5	0	0		0	0	0	0.417136
U4/U6.U5 tri-snRNP-associated protein 1	SART1	SNUT1_HUMAN	5	0	0		0	0	0	0.417136
Exocyst complex component 6	EXOC6	EXOC6_HUMAN	5	0	0		0	0	0	0.417136
Eukaryotic translation initiation factor 3 subunit K	EIF3K	EIF3K_HUMAN	5	0	0		0	0	0	0.417136
6-phosphofructo-2-kinase/fructose-2,6-bisphosphatase 3	PFKFB3	F263_HUMAN	6	5	3		3	0	2	0.416371
Polyadenylate-binding protein 4	PABPC4	PABP4_HUMAN	32	37	29		11	19	15	0.41419
Zinc finger CCHC domain-containing protein 3	ZCCHC3	ZCHC3_HUMAN	7	5	0		0	0	3	0.411727
Neuroblastoma-amplified sequence	NBAS	NBAS_HUMAN	4	2	0		0	0	0	0.409736
Serine/threonine-protein phosphatase PP1-beta catalytic subunit	PPP1CB	PP1B_HUMAN	0	5	6		4	0	0	0.408964
Bloom syndrome protein	BLM	BLM_HUMAN	3	0	2		0	0	0	0.407917
Putative transferase CAF17, mitochondrial	IBA57	CAF17_HUMAN	3	0	2		0	0	0	0.407917
Developmentally-regulated GTP-binding protein 1	DRG1	DRG1_HUMAN	3	0	6		0	0	3	0.40745
Myosin-10	MYH10	MYH10_HUMAN	29	24	19		11	13	8	0.406728
SNW domain-containing protein 1	SNW1	SNW1_HUMAN	0	5	0		0	0	0	0.404276
28S ribosomal protein S31, mitochondrial	MRPS31	RT31_HUMAN	12	6	0		4	0	2	0.401909
DNA-directed RNA polymerase I subunit RPA1	POLR1A	RPA1_HUMAN	0	3	2		0	0	0	0.400443
TAR DNA-binding protein 43	TARDBP	TADBP_HUMAN	14	12	9		6	5	4	0.397602
40S ribosomal protein S7	RPS7	RS7_HUMAN	26	4	7		13	0	0	0.397223
Polynucleotide 5'-hydroxyl-kinase NOL9	NOL9	NOL9_HUMAN	6	5	0		0	3	0	0.395227
Cleavage and polyadenylation specificity factor subunit 1	CPSF1	CPSF1_HUMAN	25	20	0		0	7	9	0.388732
Midasin	MDN1	MDN1_HUMAN	20	10	0		3	3	5	0.383653
Pentatricopeptide repeat domain-containing protein 3, mitochondrial	PTCD3	PTCD3_HUMAN	13	17	9		3	8	5	0.376521
Katanin p60 ATPase-containing subunit A1	KATNA1	KTNA1_HUMAN	0	2	3		0	0	0	0.373728
Eukaryotic translation initiation factor 3 subunit F	EIF3F	EIF3F_HUMAN	8	5	4		0	4	2	0.367419
60 kDa SS-A/Ro ribonucleoprotein	TROVE2	RO60_HUMAN	5	8	0		3	0	0	0.366638
Filamin-A	FLNA	FLNA_HUMAN	80	71	31		22	28	19	0.363039
Uridine-cytidine kinase-like 1	UCKL1	UCKL1_HUMAN	0	3	6		0	3	0	0.357902
Coilin	COIL	COIL_HUMAN	4	3	0		0	0	0	0.356891
Protein arginine N-methyltransferase 3	PRMT3	ANM3_HUMAN	3	4	0		0	0	0	0.354959
Dual specificity protein kinase CLK2	CLK2	CLK2_HUMAN	0	0	4		0	0	0	0.353832
Serine/arginine-rich splicing factor 7	SRSF7	SRSF7_HUMAN	51	56	50		15	28	19	0.350781
28S ribosomal protein S35, mitochondrial	MRPS35	RT35_HUMAN	7	7	8		5	3	0	0.350537
DDRGK domain-containing protein 1	DDRGK1	DDRGK_HUMAN	3	3	4		0	0	2	0.344397
TGF-beta-activated kinase 1 and MAP3K7-binding protein 1	TAB1	TAB1_HUMAN	27	41	23		11	13	10	0.344195
Putative RNA-binding protein Luc7-like 2	LUC7L2	LC7L2_HUMAN	4	5	5		0	4	0	0.339511
SCY1-like protein 2	SCYL2	SCYL2_HUMAN	16	12	13		6	3	6	0.338851
RNA-binding motif protein, X chromosome	RBMX	RBMX_HUMAN	69	91	57		19	27	33	0.338313
Acyl-coenzyme A thioesterase 1	ACOT1	ACOT1_HUMAN	4	4	4		0	3	0	0.334031
Adenine phosphoribosyltransferase	APRT	APT_HUMAN	7	0	0		0	0	0	0.323671
THO complex subunit 4	ALYREF	THOC4_HUMAN	21	19	0		0	12	0	0.322547
Multifunctional protein ADE2	PAICS	PUR6_HUMAN	10	9	6		4	4	0	0.321515
Paraspeckle component 1	PSPC1	PSPC1_HUMAN	3	8	6		3	0	2	0.319641
Prolactin-inducible protein	PIP	PIP_HUMAN	4	4	0		0	0	0	0.31612
Eukaryotic translation initiation factor 3 subunit G	EIF3G	EIF3G_HUMAN	10	6	6		3	0	3	0.303923
Eukaryotic translation initiation factor 4B	EIF4B	IF4B_HUMAN	200	186	188		64	54	73	0.302715
Protein phosphatase 1B	PPM1B	PPM1B_HUMAN	18	19	20		0	6	12	0.300563
Fragile X mental retardation syndrome-related protein 2	FXR2	FXR2_HUMAN	16	15	13		0	9	5	0.297793
FAST kinase domain-containing protein 5	FASTKD5	FAKD5_HUMAN	0	4	3		0	0	0	0.294248
Nucleoporin-like protein 2	NUPL2	NUPL2_HUMAN	0	4	3		0	0	0	0.294248
MOB kinase activator 2	MOB2	MOB2_HUMAN	25	34	11		0	14	7	0.291241
Protein PRRC2A	PRRC2A	PRC2A_HUMAN	3	0	4		0	0	0	0.283186
U1 small nuclear ribonucleoprotein A	SNRPA	SNRPA_HUMAN	7	11	9		3	5	0	0.279828
Transmembrane protein 199	TMEM199	TM199_HUMAN	0	0	6		0	0	0	0.256019
RING finger protein 219	RNF219	RN219_HUMAN	8	12	15		4	0	5	0.25565
U7 snRNA-associated Sm-like protein LSm11	LSM11	LSM11_HUMAN	3	2	4		0	0	0	0.255058
FAST kinase domain-containing protein 3	FASTKD3	FAKD3_HUMAN	0	4	4		0	0	0	0.253911
Transcription initiation factor TFIID subunit 4	TAF4	TAF4_HUMAN	0	4	4		0	0	0	0.253911
E3 SUMO-protein ligase RanBP2	RANBP2	RBP2_HUMAN	8	12	0		0	0	3	0.252559
RNA-binding protein 10	RBM10	RBM10_HUMAN	154	144	116		37	42	35	0.25198
Protein arginine N-methyltransferase 1	PRMT1	ANM1_HUMAN	10	7	3		0	0	3	0.246861
Transformer-2 protein homolog beta	TRA2B	TRA2B_HUMAN	43	49	36		10	16	9	0.246085
Syntaxin-binding protein 3	STXBP3	STXB3_HUMAN	0	3	5		0	0	0	0.242902
Ubiquitin carboxyl-terminal hydrolase 15	USP15	UBP15_HUMAN	7	4	0		0	0	0	0.237997
DNA-directed RNA polymerases I and III subunit RPAC1	POLR1C	RPAC1_HUMAN	7	9	4		2	2	0	0.225491
Surfeit locus protein 4	SURF4	SURF4_HUMAN	11	0	0		0	0	0	0.22351
Glycogen [starch] synthase, muscle	GYS1	GYS1_HUMAN	6	6	0		0	0	0	0.218419
Transformer-2 protein homolog alpha	TRA2A	TRA2A_HUMAN	43	29	26		7	9	6	0.205774
Zinc finger CCCH domain-containing protein 13	ZC3H13	ZC3HD_HUMAN	6	7	0		0	0	0	0.20244
Probable C-mannosyltransferase DPY19L1	DPY19L1	D19L1_HUMAN	6	7	0		0	0	0	0.20244
Dedicator of cytokinesis protein 4	DOCK4	DOCK4_HUMAN	25	22	15		6	7	0	0.201067
Serine/arginine-rich splicing factor 3	SRSF3	SRSF3_HUMAN	21	6	4		4	0	0	0.189716
Protein LYRIC	MTDH	LYRIC_HUMAN	4	5	4		0	0	0	0.186883
SUN domain-containing protein 2	SUN2	SUN2_HUMAN	18	27	11		0	4	6	0.186573
Protein virilizer homolog	KIAA1429	VIR_HUMAN	6	0	6		0	0	0	0.17701
Coordinator of PRMT5 and differentiation stimulator	COPRS	COPRS_HUMAN	6	0	6		0	0	0	0.17701
Microtubule-associated protein 1B	MAP1B	MAP1B_HUMAN	5	5	4		0	0	0	0.175529
Cancer-related nucleoside-triphosphatase	NTPCR	NTPCR_HUMAN	16	0	0		0	0	0	0.161168
Fibronectin	FN1	FINC_HUMAN	7	10	0		0	0	0	0.156986
TGF-beta-activated kinase 1 and MAP3K7-binding protein 2	TAB2	TAB2_HUMAN	4	5	6		0	0	0	0.155504
Calmodulin-regulated spectrin-associated protein 3	CAMSAP3	CAMP3_HUMAN	18	10	20		0	0	6	0.149738
Unconventional myosin-Vb	MYO5B	MYO5B_HUMAN	30	24	27		7	6	0	0.149157
Serine/arginine-rich splicing factor 10	SRSF10	SRS10_HUMAN	23	20	12		0	5	3	0.148247
Chloride channel CLIC-like protein 1	CLCC1	CLCC1_HUMAN	0	5	9		0	0	0	0.142874
Apolipoprotein C-III	APOC3	APOC3_HUMAN	0	5	9		0	0	0	0.142874
Apoptotic chromatin condensation inducer in the nucleus	ACIN1	ACINU_HUMAN	53	37	37		7	7	5	0.136132
YTH domain-containing protein 1	YTHDC1	YTDC1_HUMAN	11	9	7		0	0	2	0.136058
Putative helicase MOV-10	MOV10	MOV10_HUMAN	8	11	3		0	0	0	0.119562
Mitogen-activated protein kinase kinase kinase 7	MAP3K7	M3K7_HUMAN	7	12	3		0	0	0	0.119345
Nuclear cap-binding protein subunit 1	NCBP1	NCBP1_HUMAN	13	8	4		0	0	0	0.10471
Fragile X mental retardation protein 1	FMR1	FMR1_HUMAN	26	15	0		0	0	2	0.099959
Spectrin beta chain, non-erythrocytic 1	SPTBN1	SPTB2_HUMAN	40	37	6		6	0	0	0.0974118
Girdin	CCDC88A	GRDN_HUMAN	11	9	6		0	0	0	0.0970958
Pinin	PNN	PININ_HUMAN	9	11	8		0	0	0	0.0876472
Cleavage and polyadenylation specificity factor subunit 6	CPSF6	CPSF6_HUMAN	17	15	15		0	3	0	0.085897
Serine/arginine-rich splicing factor 9	SRSF9	SRSF9_HUMAN	12	9	8		0	0	0	0.0852879
Thyroid hormone receptor-associated protein 3	THRAP3	TR150_HUMAN	146	139	119		8	10	15	0.0755126
MAX gene-associated protein	MGA	MGAP_HUMAN	24	20	0		0	0	0	0.0630201
Serine/arginine-rich splicing factor 6	SRSF6	SRSF6_HUMAN	70	68	51		0	0	9	0.0563679
Protein Daple	CCDC88C	DAPLE_HUMAN	18	16	13		0	0	0	0.0525463
Spectrin alpha chain, non-erythrocytic 1	SPTAN1	SPTN1_HUMAN	40	35	6		0	0	0	0.0336331
Telomere-associated protein RIF1	RIF1	RIF1_HUMAN	55	31	14		0	0	0	0.0264564
Bcl-2-associated transcription factor 1	BCLAF1	BCLF1_HUMAN	83	77	52		0	3	0	0.0196939
Serine/arginine repetitive matrix protein 2	SRRM2	SRRM2_HUMAN	105	116	66		0	0	0	0.00877998
a The value was obtained by the mean normalized SC of H1N1 N terminus-truncated NS1 vector (tNS179-230) divided by that of control vector (VC). Proteins with ratios larger than the mean plus two SD (the ratios were above 5.5861) and detected in more than two replicates of the tNS179-230 group are defined as tNS1 interacting partners.
