# Supplementary material for: Interactome Profiling of N-Terminus-Truncated NS1 Protein of Influenza A Virus Reveals Role of 14-3-3γ in Virus Replication
Source: Pathogens. 2022 Jun 27;11(7):733. doi: 10.3390/pathogens11070733 (PMC9321973; doi:10.3390/pathogens11070733)
Supplement: Supplementary file 1 [file pathogens-11-00733-s001.zip › Supplemental Table S3.xlsx]

## Sheet: Table S3
Supplemental Table S3. Spectral counting-based identification of proteins co-immunoprecipitating with N terminus-truncated NS1 protein
Protein name	Gene name	Accession number	Spectral counts (SCs)							Ratio of tNS179-230/VCa
			Vector control (VC)				tNS179-230
			Rep 1	Rep 2	Rep 3		Rep 1	Rep 2	Rep 3
Endoplasmin	HSP90B1	ENPL_HUMAN	0	4	0		8	10	13	5.51679
Histone H4	HIST1H4A	H4_HUMAN	0	0	0		8	6	0	5.40006
Insulin-degrading enzyme	IDE	IDE_HUMAN	0	0	0		8	6	0	5.40006
Junction plakoglobin	JUP	PLAK_HUMAN	3	4	3		29	26	4	5.21492
Phosphoglycerate kinase 1	PGK1	PGK1_HUMAN	3	3	0		16	11	7	5.14214
DNA replication licensing factor MCM2	MCM2	MCM2_HUMAN	0	0	0		6	6	2	5.10811
Alpha-actinin-4	ACTN4	ACTN4_HUMAN	0	0	0		6	7	0	4.96671
GTPase-activating protein and VPS9 domain-containing protein 1	GAPVD1	GAPD1_HUMAN	0	0	0		5	8	0	4.91671
Septin-2	SEPT2	SEPT2_HUMAN	0	0	0		3	5	5	4.83684
Leucine--tRNA ligase, cytoplasmic	LARS	SYLC_HUMAN	0	0	0		5	5	3	4.79546
Transitional endoplasmic reticulum ATPase	VCP	TERA_HUMAN	0	0	0		9	3	0	4.7834
Uncharacterized protein C19orf52	C19orf52	CS052_HUMAN	0	0	0		0	6	6	4.75751
60S ribosomal protein L32	RPL32	RL32_HUMAN	0	0	0		0	6	6	4.75751
Cathepsin D	CTSD	CATD_HUMAN	0	0	0		6	6	0	4.63338
Desmocollin-1	DSC1	DSC1_HUMAN	0	0	0		4	8	0	4.53336
ER membrane protein complex subunit 2	EMC2	EMC2_HUMAN	0	0	0		3	4	5	4.50351
Lymphoid-specific helicase	HELLS	HELLS_HUMAN	0	0	0		4	4	4	4.48282
Glycogen phosphorylase, brain form	PYGB	PYGB_HUMAN	0	0	0		4	4	4	4.48282
Glutathione S-transferase P	GSTP1	GSTP1_HUMAN	0	0	0		4	4	4	4.48282
Annexin A2	ANXA2	ANXA2_HUMAN	0	0	0		3	7	2	4.29142
Cytosolic Fe-S cluster assembly factor NUBP2	NUBP2	NUBP2_HUMAN	0	0	0		0	7	4	4.28279
Myeloid leukemia factor 2	MLF2	MLF2_HUMAN	0	6	0		7	15	11	4.27795
14-3-3 protein eta	YWHAH	1433F_HUMAN	0	0	0		5	0	5	4.27019
Annexin A5	ANXA5	ANXA5_HUMAN	0	0	0		5	6	0	4.25004
14-3-3 protein theta	YWHAQ	1433T_HUMAN	0	0	0		6	0	4	4.2495
Serine palmitoyltransferase 1	SPTLC1	SPTC1_HUMAN	0	0	0		3	2	6	4.24087
Aldehyde dehydrogenase X, mitochondrial	ALDH1B1	AL1B1_HUMAN	3	3	0		12	12	4	4.15995
Chloride intracellular channel protein 1	CLIC1	CLIC1_HUMAN	0	0	0		2	6	3	3.97877
DnaJ homolog subfamily B member 6	DNAJB6	DNJB6_HUMAN	0	0	0		3	0	6	3.90754
Uridine 5'-monophosphate synthase	UMPS	UMPS_HUMAN	0	0	0		3	0	6	3.90754
Probable ATP-dependent RNA helicase YTHDC2	YTHDC2	YTDC2_HUMAN	0	0	0		0	0	8	3.89891
DnaJ homolog subfamily B member 12	DNAJB12	DJB12_HUMAN	0	0	0		0	0	8	3.89891
Polymeric immunoglobulin receptor	PIGR	PIGR_HUMAN	0	0	0		0	0	8	3.89891
Plakophilin-1	PKP1	PKP1_HUMAN	0	0	0		4	6	0	3.8667
Nicotinamide phosphoribosyltransferase	NAMPT	NAMPT_HUMAN	4	0	0		7	6	8	3.85907
60S ribosomal protein L7-like 1	RPL7L1	RL7L_HUMAN	0	0	0		6	0	3	3.84547
Peroxisomal membrane protein PMP34	SLC25A17	PM34_HUMAN	0	0	0		6	0	3	3.84547
Tetratricopeptide repeat protein 19, mitochondrial	TTC19	TTC19_HUMAN	0	0	0		3	2	5	3.83684
39S ribosomal protein L24, mitochondrial	MRPL24	RM24_HUMAN	0	0	0		7	0	2	3.82478
Dual specificity protein phosphatase 9	DUSP9	DUS9_HUMAN	0	0	0		4	2	4	3.81615
ATP-dependent RNA helicase DDX19A	DDX19A	DD19A_HUMAN	4	0	0		6	8	7	3.80022
Extended synaptotagmin-2	ESYT2	ESYT2_HUMAN	0	0	0		4	3	3	3.74545
Tubulin-folding cofactor B	TBCB	TBCB_HUMAN	0	0	0		4	3	3	3.74545
14-3-3 protein beta/alpha	YWHAB	1433B_HUMAN	0	0	0		8	0	0	3.7334
Elongation factor Ts, mitochondrial	TSFM	EFTS_HUMAN	0	0	0		2	4	4	3.71614
Syntaxin-binding protein 1	STXBP1	STXB1_HUMAN	0	0	0		2	4	4	3.71614
V-type proton ATPase subunit H	ATP6V1H	VATH_HUMAN	0	0	0		0	4	5	3.68682
14-3-3 protein epsilon	YWHAE	1433E_HUMAN	0	3	4		0	25	11	3.66536
Pre-mRNA-processing factor 19	PRPF19	PRP19_HUMAN	0	0	2		6	5	6	3.6594
Ran-specific GTPase-activating protein	RANBP1	RANG_HUMAN	3	0	0		9	0	6	3.64071
Carbonic anhydrase 2	CA2	CAH2_HUMAN	0	0	0		6	3	0	3.63338
a The value was obtained by the mean normalized SC of H1N1 N terminus-truncated NS1 vector (tNS179-230) divided by that of control vector (VC). Proteins with ratios greater than 3.6181 (one SD plus mean of total ratios) and smaller than 5.5861 (two SD plus mean of total ratios) are listed.
